# Supplementary material
Source: publisher figshare collection journal article supplement (https://brill.figshare.com/ndownloader/files/26729222)
Supplement: Supplementary file 1 [file 26729222]

## Sheet: Summary statistics of RNA-seq
Supplementary Table 2. Summary statistics of RNA-seq data
Group	Sample	Raw read	Clean read	Total mapped	Uniquely mapped	GC(%)	Q20(%)
1	GNZ_mock_1	33620230	31881957	29615139 (94.18)	28607967 (90.98%)	51.51	96
	GNZ_mock_2	33620230	31881957	29615139 (94.18)	26414371 (82.85%)	51.56	95.67
2	GNZ_RKN _1	33460189	32182097	22886073 (71.94%)	22042407 (69.28%)	47.91	96.22
	GNZ_RKN _2	33460189	32182097	22886073 (71.94%)	20574108 (63.93%)	47.94	95.15
3	R534_mock_1	26239395	22950244	21198815 (93.4%)	20396809 (89.87%)	50.57	95.73
	R534_mock_2	26239395	22950244	21198815 (93.4%)	19206171 (83.69%)	50.41	97.93
4	R534_RKN_1	27569754	24399850	21168909 (87.77%)	20311100 (84.21%)	49.2	95.84
	R534_RKN_2	27569754	24399850	21168909 (87.77%)	19288254 (79.05%)	49.04	95.43
GNZ_RKN = Guinongzhan indica rice cultivar inoculated with M. graminicola at 3 dpi,
R534_RKN = Wushansimiao (R534) indica rice cultivar inoculated with M. graminicola at 3 dpi,
GNZ_mock = Guinongzhan indica rice cultivar mock-inoculated controls,
R534_mock = Wushansimiao (R534) rice cultivar mock-inoculated controls.

## Sheet: DEGs (FPKM≥1)
33157 genes were expressed (FPKM ≥1) in at least one sample between Guinongzhan and Wushansimiao (R534)
geneID	R534_RKN	R534_mock		GNZ_RKN	GNZ_mock
BGIOSGA000001	2294	1780		2293	3119
BGIOSGA000002	3773	4608		3036	2770
BGIOSGA000003	0	0		0	2
BGIOSGA000004	476	460		931	534
BGIOSGA000005	372	680		572	406
BGIOSGA000006	1016	1070		1563	1156
BGIOSGA000007	1191	1047		1106	1047
BGIOSGA000008	13	68		16	36
BGIOSGA000009	2950	2796		3267	2580
BGIOSGA000010	463	2183		2967	646
BGIOSGA000011	898	1102		1517	1495
BGIOSGA000012	606	437		608	874
BGIOSGA000013	471	496		630	663
BGIOSGA000014	1296	1067		1463	1158
BGIOSGA000015	1062	497		668	1146
BGIOSGA000016	266	224		301	267
BGIOSGA000017	335	307		355	333
BGIOSGA000018	22	19		59	19
BGIOSGA000019	64	206		65	697
BGIOSGA000020	1095	1603		1260	1036
BGIOSGA000021	0	1		0	3
BGIOSGA000023	1171	918		1764	443
BGIOSGA000024	704	498		778	494
BGIOSGA000025	45	23		49	27
BGIOSGA000026	133	150		153	189
BGIOSGA000027	1707	1754		1915	2923
BGIOSGA000028	508	563		816	425
BGIOSGA000029	852	536		652	532
BGIOSGA000030	571	945		492	440
BGIOSGA000032	239	172		196	131
BGIOSGA000033	461	374		533	394
BGIOSGA000034	1	1		1	4
BGIOSGA000035	3605	1705		3450	2129
BGIOSGA000036	439	438		819	659
BGIOSGA000037	0	0		0	1
BGIOSGA000038	1	0		0	1
BGIOSGA000039	24	11		10	48
BGIOSGA000040	86	59		58	153
BGIOSGA000041	329	395		491	316
BGIOSGA000042	0	0		0	2
BGIOSGA000044	9	2		7	7
BGIOSGA000045	3570	2962		2981	2242
BGIOSGA000046	2	10		2	0
BGIOSGA000047	2863	3487		2601	2649
BGIOSGA000048	521	697		531	914
BGIOSGA000049	22	93		11	1
BGIOSGA000050	43	16		85	27
BGIOSGA000051	1011	1422		908	797
BGIOSGA000052	136	125		178	164
BGIOSGA000053	2	1		2	3
BGIOSGA000054	5833	4313		5096	3674
BGIOSGA000055	198	115		137	287
BGIOSGA000056	15	14		1	0
BGIOSGA000057	10	8		4	9
BGIOSGA000058	985	937		894	848
BGIOSGA000060	4446	4524		6417	4418
BGIOSGA000061	337	258		401	128
BGIOSGA000062	1269	821		1221	1410
BGIOSGA000063	1081	1019		968	950
BGIOSGA000064	579	710		543	547
BGIOSGA000065	5	12		11	14
BGIOSGA000067	486	348		643	487
BGIOSGA000068	157	159		164	309
BGIOSGA000069	57	6		14	1
BGIOSGA000070	1391	1167		1213	851
BGIOSGA000071	1106	778		524	1026
BGIOSGA000072	2	1		0	0
BGIOSGA000073	234	325		266	856
BGIOSGA000074	318	263		308	242
BGIOSGA000075	1682	1491		1253	4436
BGIOSGA000076	144	80		26	1249
BGIOSGA000077	655	597		649	624
BGIOSGA000078	8	2		21	130
BGIOSGA000079	281	239		260	234
BGIOSGA000080	39	85		44	34
BGIOSGA000081	0	0		0	21
BGIOSGA000082	126	216		218	618
BGIOSGA000083	272	269		199	649
BGIOSGA000084	1	6		10	11
BGIOSGA000085	0	0		0	1
BGIOSGA000086	0	0		0	1
BGIOSGA000087	234	1961		200	5834
BGIOSGA000088	2569	1630		3895	3049
BGIOSGA000089	21	19		14	198
BGIOSGA000090	1583	1112		2117	1845
BGIOSGA000091	6	5		5	0
BGIOSGA000093	4431	1437		3419	2236
BGIOSGA000094	301	131		291	162
BGIOSGA000096	585	279		608	474
BGIOSGA000097	375	1439		324	1404
BGIOSGA000098	3041	3443		3539	3083
BGIOSGA000099	121	95		119	120
BGIOSGA000101	0	0		1	0
BGIOSGA000102	100	241		82	66
BGIOSGA000103	2121	3187		2410	2191
BGIOSGA000104	99	133		95	54
BGIOSGA000105	571	362		472	385
BGIOSGA000106	0	1		0	0
BGIOSGA000108	3	4		7	41
BGIOSGA000109	1069	5294		1709	3979
BGIOSGA000110	684	562		683	914
BGIOSGA000111	719	762		925	697
BGIOSGA000112	139	12		122	18
BGIOSGA000113	237	952		277	1478
BGIOSGA000114	872	780		963	1158
BGIOSGA000115	99	11		117	34
BGIOSGA000116	505	406		524	431
BGIOSGA000118	112	46		16	191
BGIOSGA000119	129	179		29	35
BGIOSGA000121	14	2		21	28
BGIOSGA000124	1	0		2	4
BGIOSGA000125	62	12		76	17
BGIOSGA000126	2531	1814		1919	1970
BGIOSGA000128	167	236		56	98
BGIOSGA000129	202	41		56	28
BGIOSGA000130	435	352		461	490
BGIOSGA000131	29	8		21	13
BGIOSGA000134	0	0		0	4
BGIOSGA000135	79	26		90	160
BGIOSGA000136	18	6		15	8
BGIOSGA000138	1	0		0	0
BGIOSGA000140	76	10		77	14
BGIOSGA000142	1838	1334		2300	2795
BGIOSGA000144	427	508		584	680
BGIOSGA000145	272	83		227	54
BGIOSGA000146	100	69		70	56
BGIOSGA000147	3111	1427		3734	1573
BGIOSGA000148	0	1		0	1
BGIOSGA000150	261	131		278	117
BGIOSGA000151	36	22		49	44
BGIOSGA000152	695	752		1722	2232
BGIOSGA000153	975	1149		1988	4822
BGIOSGA000154	1908	549		401	964
BGIOSGA000155	207	444		200	923
BGIOSGA000156	608	204		125	1346
BGIOSGA000157	7	34		4	135
BGIOSGA000158	36	108		63	480
BGIOSGA000159	132	130		71	99
BGIOSGA000160	221	108		188	153
BGIOSGA000161	2461	1568		2087	1484
BGIOSGA000162	11	29		47	21
BGIOSGA000164	1526	1613		1152	1060
BGIOSGA000165	4319	3631		4359	4928
BGIOSGA000166	88	78		201	284
BGIOSGA000167	766	812		590	487
BGIOSGA000168	949	730		1405	1525
BGIOSGA000169	193	209		253	250
BGIOSGA000170	9	46		55	80
BGIOSGA000171	17	174		68	144
BGIOSGA000172	53	121		69	158
BGIOSGA000173	206	398		703	1262
BGIOSGA000174	164	168		512	803
BGIOSGA000175	5	4		138	199
BGIOSGA000176	1327	12211		1999	21430
BGIOSGA000177	1563	1103		1354	1129
BGIOSGA000178	211	161		184	170
BGIOSGA000179	502	599		677	530
BGIOSGA000180	127	109		211	564
BGIOSGA000181	1369	2116		1537	3423
BGIOSGA000182	33	85		56	68
BGIOSGA000183	112	113		79	202
BGIOSGA000184	2	0		2	3
BGIOSGA000185	1281	1218		1388	1396
BGIOSGA000186	38	51		40	94
BGIOSGA000187	579	1239		734	2177
BGIOSGA000190	132	239		172	92
BGIOSGA000191	291	258		353	264
BGIOSGA000192	1448	1622		1346	1194
BGIOSGA000193	863	968		1413	1307
BGIOSGA000194	802	1069		1345	1561
BGIOSGA000195	8	70		1037	718
BGIOSGA000196	157	319		153	405
BGIOSGA000197	0	0		0	2
BGIOSGA000198	437	442		482	369
BGIOSGA000199	397	176		571	323
BGIOSGA000200	1781	2421		1421	1640
BGIOSGA000201	26	0		1	0
BGIOSGA000202	24	0		0	0
BGIOSGA000203	5	1		0	9
BGIOSGA000204	2	0		0	0
BGIOSGA000205	2485	2026		2425	1870
BGIOSGA000206	102	9		120	61
BGIOSGA000207	1229	838		1159	750
BGIOSGA000208	192	163		188	136
BGIOSGA000209	269	187		234	456
BGIOSGA000210	4	4		2	0
BGIOSGA000211	0	0		0	6
BGIOSGA000212	5189	5398		6576	7243
BGIOSGA000213	3257	2212		4961	3089
BGIOSGA000214	1387	1039		2890	2404
BGIOSGA000215	21115	7135		19283	22873
BGIOSGA000216	66	26		34	49
BGIOSGA000217	298	155		177	211
BGIOSGA000218	2215	1349		2284	2527
BGIOSGA000219	728	293		345	554
BGIOSGA000220	2303	1779		3957	3933
BGIOSGA000221	819	577		1125	2298
BGIOSGA000222	653	884		833	1180
BGIOSGA000223	7	1		1	2
BGIOSGA000224	1835	1813		1508	1936
BGIOSGA000225	3437	3098		4374	3462
BGIOSGA000226	1762	1615		1896	1281
BGIOSGA000227	1562	1388		1449	1144
BGIOSGA000228	5392	5022		6065	5671
BGIOSGA000229	44	57		33	44
BGIOSGA000230	529	333		643	338
BGIOSGA000231	1257	1037		1820	2804
BGIOSGA000232	5	3		8	15
BGIOSGA000233	3183	2607		3230	2840
BGIOSGA000234	4	4		5	9
BGIOSGA000235	1649	1328		1455	1075
BGIOSGA000236	882	704		1233	1083
BGIOSGA000237	1863	1039		1535	1076
BGIOSGA000238	73	206		111	244
BGIOSGA000239	118	15		135	26
BGIOSGA000240	2	1		1	6
BGIOSGA000242	694	655		732	1215
BGIOSGA000243	8306	7846		7501	9988
BGIOSGA000244	1376	1418		1091	1096
BGIOSGA000245	1422	1139		1163	1539
BGIOSGA000247	215	153		262	540
BGIOSGA000248	195	153		380	320
BGIOSGA000249	1403	824		1864	1013
BGIOSGA000251	484	324		655	369
BGIOSGA000252	6	33		36	49
BGIOSGA000253	4	8		0	22
BGIOSGA000254	7	33		9	93
BGIOSGA000255	3883	3786		4045	3644
BGIOSGA000256	798	1170		702	569
BGIOSGA000257	2410	1759		2392	1969
BGIOSGA000258	583	1335		578	1436
BGIOSGA000259	937	1694		849	2900
BGIOSGA000260	488	1271		291	1849
BGIOSGA000261	3918	3610		9967	9358
BGIOSGA000262	4992	2142		5587	2583
BGIOSGA000263	832	723		559	427
BGIOSGA000264	2680	3381		3368	4747
BGIOSGA000265	513	548		300	399
BGIOSGA000267	20	18		43	30
BGIOSGA000268	1010	713		1565	869
BGIOSGA000269	3	0		12	13
BGIOSGA000270	112	9		70	44
BGIOSGA000271	240	162		245	155
BGIOSGA000272	633	561		1251	886
BGIOSGA000273	42	38		97	65
BGIOSGA000274	108	224		24	296
BGIOSGA000275	730	629		748	736
BGIOSGA000276	25	17		22	25
BGIOSGA000277	959	657		1132	652
BGIOSGA000278	24	16		14	52
BGIOSGA000279	9713	11939		8980	19109
BGIOSGA000280	530	656		502	642
BGIOSGA000281	1	93		191	848
BGIOSGA000283	729	911		1291	2562
BGIOSGA000284	0	1		0	0
BGIOSGA000285	1343	1263		1091	1128
BGIOSGA000286	89	146		215	147
BGIOSGA000287	1611	1299		1682	1195
BGIOSGA000288	30	5		22	19
BGIOSGA000289	0	1		8	2
BGIOSGA000290	3486	4474		3163	9943
BGIOSGA000291	1907	1678		1606	1293
BGIOSGA000292	3005	2373		3284	3503
BGIOSGA000293	793	951		834	628
BGIOSGA000294	1219	898		999	879
BGIOSGA000295	123	100		197	227
BGIOSGA000298	2736	2186		2994	2598
BGIOSGA000299	1574	857		1556	1671
BGIOSGA000301	15660	8087		12139	19721
BGIOSGA000302	10	1		6	5
BGIOSGA000303	191	198		345	336
BGIOSGA000304	892	816		1054	973
BGIOSGA000305	811	609		853	712
BGIOSGA000306	1551	1580		1935	1669
BGIOSGA000307	1087	405		869	532
BGIOSGA000309	928	1259		1226	2962
BGIOSGA000310	467	727		670	476
BGIOSGA000311	527	1150		633	547
BGIOSGA000312	930	546		904	932
BGIOSGA000313	700	898		715	533
BGIOSGA000314	4544	2062		5371	1868
BGIOSGA000315	247	483		213	345
BGIOSGA000316	369	748		493	609
BGIOSGA000317	1628	2138		5001	3486
BGIOSGA000318	1106	1218		1083	812
BGIOSGA000319	140	992		244	481
BGIOSGA000320	1184	999		1085	1944
BGIOSGA000321	3	2		0	0
BGIOSGA000322	1763	1351		1663	1670
BGIOSGA000323	3	3		3	9
BGIOSGA000324	3	13		4	4
BGIOSGA000325	4058	4059		3498	3942
BGIOSGA000326	2796	1872		2838	2641
BGIOSGA000327	607	458		635	736
BGIOSGA000328	1516	1197		1482	1360
BGIOSGA000329	1730	1211		1986	1672
BGIOSGA000330	60	2		113	1
BGIOSGA000331	153	42		138	51
BGIOSGA000332	813	762		2341	1294
BGIOSGA000333	13052	12146		12051	12366
BGIOSGA000334	797	593		634	525
BGIOSGA000335	5	2		0	1
BGIOSGA000337	20	10		8	4
BGIOSGA000338	1239	721		1690	788
BGIOSGA000339	2524	1027		2193	2131
BGIOSGA000340	2	0		11	1
BGIOSGA000341	0	0		0	1
BGIOSGA000342	66	153		45	648
BGIOSGA000343	1	1		1	1
BGIOSGA000344	222	288		93	671
BGIOSGA000345	294	82		124	105
BGIOSGA000346	68	52		44	23
BGIOSGA000347	65	43		145	97
BGIOSGA000348	0	0		0	1
BGIOSGA000349	1	0		2	0
BGIOSGA000350	10	4		4	0
BGIOSGA000351	59	34		92	28
BGIOSGA000352	180	33		112	106
BGIOSGA000353	90	78		88	122
BGIOSGA000354	2057	2680		2351	3426
BGIOSGA000355	0	0		1	0
BGIOSGA000356	547	349		723	2564
BGIOSGA000357	64	13		124	26
BGIOSGA000358	1116	1374		915	805
BGIOSGA000359	2535	2145		2799	1675
BGIOSGA000361	3076	3650		3163	2943
BGIOSGA000362	170	132		131	138
BGIOSGA000363	1388	1197		1642	1713
BGIOSGA000364	556	475		521	401
BGIOSGA000365	0	0		3	0
BGIOSGA000366	1059	535		779	848
BGIOSGA000367	7	81		33	357
BGIOSGA000368	272	286		529	329
BGIOSGA000369	4615	1557		3249	2427
BGIOSGA000370	2447	2788		2620	4939
BGIOSGA000371	592	637		548	583
BGIOSGA000372	565	429		596	505
BGIOSGA000373	1109	1172		1139	1155
BGIOSGA000374	2715	4780		3495	15596
BGIOSGA000375	12022	7665		11796	15695
BGIOSGA000377	566	578		509	356
BGIOSGA000378	5221	927		6269	9460
BGIOSGA000379	0	9		6	21
BGIOSGA000380	160	204		224	197
BGIOSGA000381	303	417		272	386
BGIOSGA000382	736	1999		1596	1111
BGIOSGA000383	2276	2745		1063	3539
BGIOSGA000384	0	2		1	23
BGIOSGA000385	8	0		1	1
BGIOSGA000386	27	49		43	18
BGIOSGA000389	568	765		732	1802
BGIOSGA000390	2498	1770		3786	3810
BGIOSGA000391	518	395		374	293
BGIOSGA000392	1	1		3	4
BGIOSGA000393	2355	1818		2178	5125
BGIOSGA000394	279	214		801	895
BGIOSGA000395	40	83		88	202
BGIOSGA000396	433	210		1164	445
BGIOSGA000397	291	172		368	269
BGIOSGA000398	226	243		248	233
BGIOSGA000399	4301	2270		3406	4762
BGIOSGA000400	289	332		518	1123
BGIOSGA000401	8	13		5	29
BGIOSGA000402	1108	1073		945	792
BGIOSGA000403	402	535		739	260
BGIOSGA000404	209	198		206	92
BGIOSGA000405	318	340		249	159
BGIOSGA000406	2211	2957		1775	3540
BGIOSGA000407	734	631		637	858
BGIOSGA000410	497	423		1052	754
BGIOSGA000412	2788	2325		3230	2314
BGIOSGA000413	2877	3483		2845	2595
BGIOSGA000416	300	191		250	173
BGIOSGA000418	0	1		0	1
BGIOSGA000420	1064	969		973	915
BGIOSGA000421	354	278		309	218
BGIOSGA000422	1	3		17	2
BGIOSGA000423	768	671		949	715
BGIOSGA000424	1	2		2	8
BGIOSGA000425	1525	1031		948	652
BGIOSGA000426	1183	1334		1859	1599
BGIOSGA000427	1214	1078		909	892
BGIOSGA000428	722	686		1141	9579
BGIOSGA000429	2683	2132		2548	4876
BGIOSGA000430	1126	1190		740	1783
BGIOSGA000431	1024	1025		1345	1354
BGIOSGA000432	854	1256		1322	1967
BGIOSGA000433	1	0		11	20
BGIOSGA000434	3	10		5	4
BGIOSGA000435	66	260		96	2507
BGIOSGA000436	8	6		2	6
BGIOSGA000437	44	54		42	145
BGIOSGA000438	4783	1909		2999	6487
BGIOSGA000439	3843	2702		4740	3507
BGIOSGA000440	67	958		39	1002
BGIOSGA000441	5	0		2	1
BGIOSGA000442	81	654		110	215
BGIOSGA000443	566	561		442	598
BGIOSGA000444	2096	3765		1709	2948
BGIOSGA000445	2184	1746		1736	1904
BGIOSGA000446	853	586		867	997
BGIOSGA000447	270	211		305	184
BGIOSGA000448	394	393		698	493
BGIOSGA000449	114	116		178	120
BGIOSGA000450	936	707		956	835
BGIOSGA000451	1168	2208		2167	3127
BGIOSGA000452	162	80		49	736
BGIOSGA000453	781	899		900	820
BGIOSGA000455	1230	1809		1608	2844
BGIOSGA000456	744	697		765	767
BGIOSGA000457	2031	2192		1808	1952
BGIOSGA000458	493	336		651	587
BGIOSGA000459	133	89		155	141
BGIOSGA000460	2522	1161		1404	2806
BGIOSGA000461	752	722		740	758
BGIOSGA000462	70	55		62	58
BGIOSGA000463	1480	1505		1662	3139
BGIOSGA000464	75	72		86	80
BGIOSGA000465	699	777		745	708
BGIOSGA000466	1653	8668		1277	27327
BGIOSGA000468	346	113		349	345
BGIOSGA000469	226	126		161	126
BGIOSGA000471	0	0		2	0
BGIOSGA000472	799	677		1409	2605
BGIOSGA000473	3	2		2	3
BGIOSGA000474	703	501		538	403
BGIOSGA000475	1588	1812		1492	2122
BGIOSGA000476	795	603		1912	619
BGIOSGA000477	1053	923		810	870
BGIOSGA000478	3414	1849		2481	1490
BGIOSGA000479	939	710		874	909
BGIOSGA000480	419	222		457	545
BGIOSGA000481	739	759		484	2132
BGIOSGA000482	2395	2069		2119	2805
BGIOSGA000485	210	141		184	123
BGIOSGA000486	280	187		272	211
BGIOSGA000487	5	4		9	41
BGIOSGA000488	315	384		446	350
BGIOSGA000489	296	57		468	283
BGIOSGA000490	557	339		419	777
BGIOSGA000491	1	2		3	3
BGIOSGA000492	935	784		754	969
BGIOSGA000493	39	44		51	26
BGIOSGA000494	445	383		602	594
BGIOSGA000495	708	463		1190	2032
BGIOSGA000496	1129	1352		1100	1725
BGIOSGA000497	793	678		946	627
BGIOSGA000498	670	2011		833	5350
BGIOSGA000499	0	2		0	1
BGIOSGA000500	716	967		1467	1317
BGIOSGA000501	971	707		1048	1178
BGIOSGA000502	250	111		344	267
BGIOSGA000503	9	15		24	30
BGIOSGA000504	58	129		100	121
BGIOSGA000505	3	6		0	1
BGIOSGA000506	0	1		1	0
BGIOSGA000507	1139	647		870	750
BGIOSGA000508	250	375		758	1333
BGIOSGA000509	241	489		561	424
BGIOSGA000510	159	485		221	1024
BGIOSGA000511	4440	3899		6171	4574
BGIOSGA000512	249	101		497	422
BGIOSGA000513	772	582		648	471
BGIOSGA000514	830	1188		1372	1763
BGIOSGA000515	839	546		1093	689
BGIOSGA000516	0	4		1	21
BGIOSGA000517	3178	2329		4144	3912
BGIOSGA000518	3968	7509		10480	2911
BGIOSGA000519	2676	1421		2258	4753
BGIOSGA000520	7761	8590		10442	11490
BGIOSGA000521	187	393		122	367
BGIOSGA000522	265	241		175	256
BGIOSGA000523	143	72		21	231
BGIOSGA000524	445	776		518	1627
BGIOSGA000525	0	0		0	1
BGIOSGA000526	2927	2086		2410	2955
BGIOSGA000527	1490	1156		1169	2690
BGIOSGA000528	1	0		0	1
BGIOSGA000530	104	138		202	532
BGIOSGA000531	835	2492		1411	3156
BGIOSGA000532	8745	5507		8792	8859
BGIOSGA000533	0	1		2	19
BGIOSGA000534	538	441		429	319
BGIOSGA000535	673	405		608	929
BGIOSGA000536	4143	4567		3944	3705
BGIOSGA000537	2855	1948		2427	2323
BGIOSGA000538	11	3		23	4
BGIOSGA000539	21412	22194		21756	19498
BGIOSGA000540	701	548		734	653
BGIOSGA000542	1239	1086		1920	1901
BGIOSGA000543	3992	4506		4769	6864
BGIOSGA000544	3554	3067		2799	2784
BGIOSGA000545	29	68		27	67
BGIOSGA000546	964	1669		1018	2397
BGIOSGA000547	1122	814		863	870
BGIOSGA000548	1822	1556		1886	2085
BGIOSGA000549	514	518		377	351
BGIOSGA000550	19	245		43	281
BGIOSGA000551	91	299		44	610
BGIOSGA000552	0	0		0	2
BGIOSGA000553	1426	569		1730	1452
BGIOSGA000554	1149	1157		1400	1265
BGIOSGA000555	1041	870		873	968
BGIOSGA000556	17	4		43	56
BGIOSGA000557	16	7		18	11
BGIOSGA000558	0	1		1	0
BGIOSGA000560	163	60		225	165
BGIOSGA000561	542	399		809	1055
BGIOSGA000562	397	361		432	475
BGIOSGA000563	668	374		534	328
BGIOSGA000564	221	310		226	299
BGIOSGA000566	534	453		926	96
BGIOSGA000567	1112	932		1245	1181
BGIOSGA000568	1	1		0	0
BGIOSGA000569	316	194		232	288
BGIOSGA000571	2319	5305		3570	8974
BGIOSGA000572	199	490		121	408
BGIOSGA000573	150	104		124	59
BGIOSGA000574	1	1		0	0
BGIOSGA000575	11	10		15	3
BGIOSGA000577	69	344		215	746
BGIOSGA000579	1199	1155		881	2152
BGIOSGA000580	813	517		1542	734
BGIOSGA000581	2759	2122		2787	2136
BGIOSGA000582	2087	1417		2157	1742
BGIOSGA000583	229	740		126	1943
BGIOSGA000586	1	0		5	25
BGIOSGA000587	5013	3999		4908	5085
BGIOSGA000588	439	253		635	515
BGIOSGA000589	55	72		104	525
BGIOSGA000590	13	24		12	29
BGIOSGA000591	3687	3673		3237	7998
BGIOSGA000592	151	207		750	826
BGIOSGA000593	1693	2353		1161	1079
BGIOSGA000594	163	162		345	773
BGIOSGA000595	575	1730		803	4071
BGIOSGA000596	35	4		43	20
BGIOSGA000597	8781	6655		9683	8768
BGIOSGA000598	738	909		591	2574
BGIOSGA000599	9	13		17	9
BGIOSGA000600	55	47		48	29
BGIOSGA000601	1223	2478		1217	9436
BGIOSGA000602	348	472		235	1009
BGIOSGA000603	6675	3768		4959	6472
BGIOSGA000604	229	212		189	127
BGIOSGA000605	4092	5338		4083	8983
BGIOSGA000606	240	229		300	405
BGIOSGA000607	90	166		69	45
BGIOSGA000608	3	12		8	23
BGIOSGA000609	0	0		1	0
BGIOSGA000610	0	1		2	3
BGIOSGA000612	1115	1098		1268	1156
BGIOSGA000613	821	963		886	843
BGIOSGA000614	2519	2237		3792	2701
BGIOSGA000615	133	98		153	97
BGIOSGA000618	512	502		551	355
BGIOSGA000619	407	406		381	365
BGIOSGA000620	336	1171		188	314
BGIOSGA000621	896	1049		715	543
BGIOSGA000622	107	150		124	63
BGIOSGA000623	865	772		727	517
BGIOSGA000624	1505	2083		1747	1641
BGIOSGA000625	144	186		59	116
BGIOSGA000626	269	360		132	197
BGIOSGA000627	5	12		21	16
BGIOSGA000628	445	514		981	2068
BGIOSGA000629	1135	625		1196	764
BGIOSGA000630	1496	1333		1293	1188
BGIOSGA000631	5344	5724		6782	7578
BGIOSGA000632	138	228		121	90
BGIOSGA000633	126	125		119	71
BGIOSGA000634	143	2132		8	56
BGIOSGA000635	846	11986		2730	8504
BGIOSGA000636	0	3		0	0
BGIOSGA000638	2396	1539		3485	3275
BGIOSGA000639	110	412		261	752
BGIOSGA000640	51	154		87	596
BGIOSGA000641	1166	1183		1580	1227
BGIOSGA000642	2075	1268		1877	2637
BGIOSGA000643	231	33		228	78
BGIOSGA000644	395	425		323	645
BGIOSGA000645	984	1766		1145	4446
BGIOSGA000646	0	0		0	6
BGIOSGA000648	1	0		0	0
BGIOSGA000649	190	236		185	617
BGIOSGA000650	211	232		384	997
BGIOSGA000651	4	1		2	8
BGIOSGA000652	634	941		1227	2617
BGIOSGA000653	15	15		9	7
BGIOSGA000654	453	453		310	577
BGIOSGA000655	362	334		313	271
BGIOSGA000657	3507	4293		2338	7774
BGIOSGA000658	623	1222		584	3341
BGIOSGA000659	233	2968		324	5803
BGIOSGA000660	245	494		219	1395
BGIOSGA000661	34	39		7	31
BGIOSGA000662	972	835		797	719
BGIOSGA000663	605	529		534	584
BGIOSGA000666	30	18		44	47
BGIOSGA000667	34	23		4	16
BGIOSGA000668	305	285		372	317
BGIOSGA000669	29	10		138	96
BGIOSGA000670	430	357		459	326
BGIOSGA000672	52	74		42	39
BGIOSGA000673	0	2		0	0
BGIOSGA000674	481	368		375	266
BGIOSGA000676	1	6		7	41
BGIOSGA000677	791	1259		801	8484
BGIOSGA000679	1701	1180		1504	1695
BGIOSGA000680	72	126		40	62
BGIOSGA000681	768	88		186	900
BGIOSGA000682	483	919		1148	2277
BGIOSGA000683	406	166		350	139
BGIOSGA000684	154	262		265	218
BGIOSGA000685	2	4		0	5
BGIOSGA000686	163	231		261	392
BGIOSGA000687	10	2		9	2
BGIOSGA000689	102	1123		103	5474
BGIOSGA000690	1486	1026		1327	1557
BGIOSGA000691	549	770		518	509
BGIOSGA000692	346	259		267	345
BGIOSGA000693	2691	8423		2129	25675
BGIOSGA000694	0	0		0	1
BGIOSGA000696	15	3		1	0
BGIOSGA000697	3	3		7	5
BGIOSGA000698	1301	1030		1206	1043
BGIOSGA000699	112	216		131	205
BGIOSGA000700	247	246		0	0
BGIOSGA000701	29	20		12	55
BGIOSGA000702	2230	3122		3370	5476
BGIOSGA000703	4	9		40	100
BGIOSGA000704	141	95		240	124
BGIOSGA000706	3715	4022		3373	7643
BGIOSGA000707	0	0		0	1
BGIOSGA000713	11	0		7	3
BGIOSGA000715	90	45		122	158
BGIOSGA000716	216	240		333	391
BGIOSGA000717	409	387		398	408
BGIOSGA000718	792	729		875	1516
BGIOSGA000719	1221	4854		1463	8181
BGIOSGA000720	787	507		721	680
BGIOSGA000721	768	535		788	695
BGIOSGA000723	841	633		806	1034
BGIOSGA000724	613	1163		1454	9702
BGIOSGA000725	2605	3267		2082	2543
BGIOSGA000726	1594	1677		821	1264
BGIOSGA000727	1	1		0	0
BGIOSGA000728	44	176		40	41
BGIOSGA000729	17	5		11	7
BGIOSGA000730	602	550		619	582
BGIOSGA000731	284	237		295	291
BGIOSGA000732	2	1		3	4
BGIOSGA000733	188	189		202	424
BGIOSGA000734	1076	796		898	910
BGIOSGA000735	110	95		88	67
BGIOSGA000736	0	2		1	0
BGIOSGA000737	1021	1057		1074	1003
BGIOSGA000738	3415	2766		3578	4875
BGIOSGA000739	244	359		454	325
BGIOSGA000741	134	70		162	147
BGIOSGA000742	228	228		287	243
BGIOSGA000743	759	951		935	1009
BGIOSGA000746	104	126		124	131
BGIOSGA000747	811	920		560	1960
BGIOSGA000748	80	346		80	784
BGIOSGA000749	0	0		1	1
BGIOSGA000750	1373	1529		1531	1695
BGIOSGA000751	6464	5999		5967	5221
BGIOSGA000752	1358	1397		1131	2009
BGIOSGA000753	114	159		34	666
BGIOSGA000754	344	489		305	1347
BGIOSGA000755	0	0		0	2
BGIOSGA000756	60	990		258	841
BGIOSGA000757	99	173		49	42
BGIOSGA000758	60	179		60	373
BGIOSGA000759	241	323		276	360
BGIOSGA000760	170	251		251	263
BGIOSGA000761	4	5		131	172
BGIOSGA000762	0	1		1	1
BGIOSGA000763	780	760		811	937
BGIOSGA000764	172	173		153	135
BGIOSGA000765	1921	695		1241	1496
BGIOSGA000766	32130	23115		39709	31314
BGIOSGA000767	638	483		1181	1157
BGIOSGA000768	0	0		0	3
BGIOSGA000769	643	643		1054	1242
BGIOSGA000770	144	93		242	78
BGIOSGA000771	56	54		91	123
BGIOSGA000772	1274	884		1363	1201
BGIOSGA000773	841	728		1423	1019
BGIOSGA000774	462	411		551	337
BGIOSGA000775	121	190		155	244
BGIOSGA000776	1128	1025		756	716
BGIOSGA000778	211	71		36	223
BGIOSGA000779	21	4		19	33
BGIOSGA000780	705	657		651	765
BGIOSGA000781	480	115		425	382
BGIOSGA000782	0	2		0	72
BGIOSGA000783	9848	5921		6083	7216
BGIOSGA000784	801	900		759	815
BGIOSGA000785	1	1		5	5
BGIOSGA000786	130	120		254	140
BGIOSGA000787	6	1		3	7
BGIOSGA000788	26	3		3	20
BGIOSGA000789	77	4		39	40
BGIOSGA000790	373	338		801	241
BGIOSGA000791	1324	1080		1172	1270
BGIOSGA000792	227	60		12	16
BGIOSGA000793	354	679		499	1182
BGIOSGA000794	4	4		2	6
BGIOSGA000795	60	472		95	1360
BGIOSGA000796	471	479		514	1518
BGIOSGA000797	176	245		153	118
BGIOSGA000798	1213	1791		1708	2491
BGIOSGA000799	1119	747		928	1271
BGIOSGA000800	12	6		17	52
BGIOSGA000801	3542	3802		2992	3576
BGIOSGA000802	96	155		84	529
BGIOSGA000803	0	0		3	11
BGIOSGA000804	268	7		142	24
BGIOSGA000805	905	816		736	949
BGIOSGA000806	281	189		317	282
BGIOSGA000807	86	86		103	103
BGIOSGA000808	77	566		377	84
BGIOSGA000809	2472	1320		2317	1917
BGIOSGA000810	1188	994		1401	857
BGIOSGA000811	2114	1869		2349	1897
BGIOSGA000812	1410	281		1582	551
BGIOSGA000813	848	655		761	872
BGIOSGA000814	32	23		27	48
BGIOSGA000815	1428	1662		1194	1014
BGIOSGA000816	7853	6222		7421	8693
BGIOSGA000817	169	136		150	107
BGIOSGA000818	1143	476		845	766
BGIOSGA000819	5752	6992		6837	6672
BGIOSGA000820	3525	1188		2406	2388
BGIOSGA000821	960	828		1091	893
BGIOSGA000822	2403	2088		3454	4196
BGIOSGA000823	1726	4010		2150	15468
BGIOSGA000824	1254	2255		2926	5722
BGIOSGA000825	58	25		92	22
BGIOSGA000826	4056	6392		6190	15605
BGIOSGA000827	5759	13854		6745	20471
BGIOSGA000828	3289	3733		2817	11476
BGIOSGA000829	22	3		38	23
BGIOSGA000830	72	13		44	82
BGIOSGA000831	168	226		239	200
BGIOSGA000832	28	9		12	7
BGIOSGA000833	743	851		893	818
BGIOSGA000834	608	1072		731	1334
BGIOSGA000835	75	92		159	169
BGIOSGA000836	1284	2377		1259	6976
BGIOSGA000837	9645	2452		12206	2148
BGIOSGA000838	0	0		1	0
BGIOSGA000839	39	12		85	80
BGIOSGA000840	509	844		662	1208
BGIOSGA000842	1	1		1	2
BGIOSGA000843	1929	1329		1791	1540
BGIOSGA000844	4594	4978		3669	5579
BGIOSGA000845	664	523		658	590
BGIOSGA000846	296	334		397	433
BGIOSGA000847	901	233		1239	492
BGIOSGA000848	106	72		117	75
BGIOSGA000849	1380	908		1259	919
BGIOSGA000850	443	620		504	741
BGIOSGA000851	312	388		320	291
BGIOSGA000853	504	529		553	617
BGIOSGA000854	2981	1012		1882	2357
BGIOSGA000855	1498	1944		2133	2296
BGIOSGA000856	3718	9580		3490	12505
BGIOSGA000858	3238	2328		3613	3343
BGIOSGA000859	5400	1899		4116	3264
BGIOSGA000860	36	22		10	8
BGIOSGA000861	1707	1375		1647	1657
BGIOSGA000862	34	69		98	180
BGIOSGA000863	54	34		85	225
BGIOSGA000864	152	54		136	97
BGIOSGA000865	428	140		283	162
BGIOSGA000867	949	1004		868	1130
BGIOSGA000868	534	483		637	788
BGIOSGA000869	185	18		68	33
BGIOSGA000870	49	34		18	32
BGIOSGA000871	1016	688		1106	1050
BGIOSGA000872	855	900		888	836
BGIOSGA000873	678	545		1248	1509
BGIOSGA000874	87	73		156	66
BGIOSGA000875	78	44		13	15
BGIOSGA000876	91	54		78	46
BGIOSGA000877	4	2		3	8
BGIOSGA000878	182	43		37	138
BGIOSGA000879	486	446		517	505
BGIOSGA000880	164	145		203	192
BGIOSGA000881	0	0		0	2
BGIOSGA000883	254	258		75	172
BGIOSGA000884	793	784		923	579
BGIOSGA000885	398	383		621	2158
BGIOSGA000886	296	351		629	758
BGIOSGA000887	95	232		104	145
BGIOSGA000888	68	264		21	396
BGIOSGA000889	0	0		0	4
BGIOSGA000890	3	0		2	1
BGIOSGA000892	42	36		114	116
BGIOSGA000893	171	418		578	1730
BGIOSGA000894	7	3		23	21
BGIOSGA000895	11	29		26	16
BGIOSGA000896	4560	3720		9186	16297
BGIOSGA000897	2582	3011		3458	3613
BGIOSGA000898	133	110		3	47
BGIOSGA000899	8550	9816		12817	11552
BGIOSGA000900	578	566		402	459
BGIOSGA000901	396	1327		653	2238
BGIOSGA000902	3564	3884		4654	4926
BGIOSGA000903	0	0		0	2
BGIOSGA000905	7681	14328		4976	25704
BGIOSGA000906	346	442		494	409
BGIOSGA000907	4094	4978		5156	4146
BGIOSGA000908	48	67		20	42
BGIOSGA000909	0	0		1	0
BGIOSGA000910	4	4		2	5
BGIOSGA000911	2815	4864		2930	19156
BGIOSGA000912	120	114		123	117
BGIOSGA000913	1708	1398		2025	1722
BGIOSGA000914	55	61		87	71
BGIOSGA000915	634	405		728	645
BGIOSGA000916	97	9		125	11
BGIOSGA000917	300	106		412	158
BGIOSGA000919	237	170		144	154
BGIOSGA000920	1073	1373		1192	1758
BGIOSGA000921	4	24		46	354
BGIOSGA000922	716	666		824	911
BGIOSGA000923	3215	2694		4065	5924
BGIOSGA000925	2186	2272		2817	1493
BGIOSGA000926	204	143		171	205
BGIOSGA000927	1	5		1	17
BGIOSGA000929	5	0		0	0
BGIOSGA000931	10	0		6	0
BGIOSGA000932	120	135		178	230
BGIOSGA000933	22	18		15	20
BGIOSGA000934	81	184		177	313
BGIOSGA000935	7898	5808		10272	18379
BGIOSGA000936	1	3		4	6
BGIOSGA000937	576	336		736	348
BGIOSGA000938	858	830		731	1529
BGIOSGA000939	73	31		62	53
BGIOSGA000940	120	40		260	206
BGIOSGA000941	16	5		54	16
BGIOSGA000942	417	272		505	295
BGIOSGA000943	808	841		913	914
BGIOSGA000944	205	142		167	83
BGIOSGA000945	678	2235		187	883
BGIOSGA000946	111	208		55	872
BGIOSGA000947	540	480		392	401
BGIOSGA000948	292	334		193	369
BGIOSGA000949	0	1		0	13
BGIOSGA000952	362	178		438	556
BGIOSGA000953	188	552		205	149
BGIOSGA000954	215	74		108	129
BGIOSGA000955	148	149		199	438
BGIOSGA000956	81	9		141	117
BGIOSGA000957	337	5046		1014	9768
BGIOSGA000958	434	4131		1196	7035
BGIOSGA000959	31	51		8	111
BGIOSGA000960	0	0		0	6
BGIOSGA000961	1071	1340		1415	1389
BGIOSGA000962	1	0		0	5
BGIOSGA000963	0	0		0	3
BGIOSGA000964	1	1		0	5
BGIOSGA000965	7	30		10	95
BGIOSGA000966	1	0		0	38
BGIOSGA000968	1271	577		1313	2211
BGIOSGA000969	69	103		29	92
BGIOSGA000970	73	101		43	54
BGIOSGA000971	984	922		475	994
BGIOSGA000972	0	0		1	0
BGIOSGA000973	417	352		268	169
BGIOSGA000974	157	95		174	430
BGIOSGA000975	0	0		1	0
BGIOSGA000976	0	0		1	2
BGIOSGA000977	2327	1912		2727	2482
BGIOSGA000978	330	289		369	284
BGIOSGA000979	395	256		363	331
BGIOSGA000980	1214	1361		1221	1443
BGIOSGA000982	2573	6379		2680	12795
BGIOSGA000985	2057	1275		3314	2326
BGIOSGA000987	81	205		123	502
BGIOSGA000988	263	638		234	1196
BGIOSGA000989	626	632		482	510
BGIOSGA000990	64	366		137	343
BGIOSGA000992	78	117		36	277
BGIOSGA000993	535	602		346	1159
BGIOSGA000994	50	61		54	148
BGIOSGA000995	1457	2441		2368	8383
BGIOSGA000996	210	205		177	179
BGIOSGA000997	28	76		34	79
BGIOSGA000998	1685	2652		1242	1418
BGIOSGA000999	38	44		41	105
BGIOSGA001000	207	472		256	870
BGIOSGA001001	821	661		714	627
BGIOSGA001003	395	231		392	453
BGIOSGA001004	1255	1149		1101	970
BGIOSGA001005	269	315		288	243
BGIOSGA001006	1777	4117		670	1253
BGIOSGA001007	35	14		36	52
BGIOSGA001008	1125	975		1151	1167
BGIOSGA001009	118	95		91	118
BGIOSGA001010	917	1417		540	1162
BGIOSGA001011	10	2		4	30
BGIOSGA001012	1190	1714		1175	1004
BGIOSGA001013	18944	5937		15172	27475
BGIOSGA001014	13	43		3	11
BGIOSGA001015	48	157		15	46
BGIOSGA001016	314	228		173	130
BGIOSGA001017	1	0		3	0
BGIOSGA001018	907	537		475	693
BGIOSGA001019	84	110		77	43
BGIOSGA001020	4916	3155		5496	3610
BGIOSGA001021	1073	1127		1341	1543
BGIOSGA001022	13894	15655		15043	15158
BGIOSGA001023	2743	1888		2883	3372
BGIOSGA001024	571	612		619	545
BGIOSGA001025	2268	3412		1934	3619
BGIOSGA001026	0	2		1	30
BGIOSGA001028	102	66		177	107
BGIOSGA001029	92	646		112	771
BGIOSGA001030	2596	2123		2706	4829
BGIOSGA001032	8414	6051		6611	6553
BGIOSGA001033	1350	1767		1347	2970
BGIOSGA001034	4708	2688		3772	3247
BGIOSGA001035	1265	1417		1568	3569
BGIOSGA001036	804	796		774	800
BGIOSGA001037	6237	5206		6061	8708
BGIOSGA001038	1483	1248		1193	1315
BGIOSGA001039	0	2		2	18
BGIOSGA001040	5	6		31	11
BGIOSGA001041	866	1503		903	1110
BGIOSGA001042	2171	2562		2586	5080
BGIOSGA001043	45	65		76	68
BGIOSGA001044	550	532		624	627
BGIOSGA001045	1950	3071		3408	5441
BGIOSGA001046	2181	456		2246	498
BGIOSGA001047	549	289		355	281
BGIOSGA001048	194	165		46	78
BGIOSGA001049	417	331		380	1098
BGIOSGA001050	114	163		152	304
BGIOSGA001051	257	120		145	117
BGIOSGA001052	204	106		124	66
BGIOSGA001053	128	147		113	204
BGIOSGA001054	2778	2190		7591	5904
BGIOSGA001055	1900	4405		2487	18275
BGIOSGA001056	58	64		43	86
BGIOSGA001057	2265	1676		1721	2248
BGIOSGA001059	0	1		0	0
BGIOSGA001060	2969	3595		3045	7762
BGIOSGA001061	352	402		296	912
BGIOSGA001062	4964	4784		5933	5899
BGIOSGA001063	319	377		478	660
BGIOSGA001064	500	465		518	628
BGIOSGA001065	63	15		33	163
BGIOSGA001066	328	512		134	1538
BGIOSGA001067	1	5		3	5
BGIOSGA001069	938	826		574	3187
BGIOSGA001070	2187	1842		1641	2741
BGIOSGA001071	5	22		1	0
BGIOSGA001072	1145	1120		1484	1977
BGIOSGA001073	2890	3547		2587	3138
BGIOSGA001074	1236	855		821	547
BGIOSGA001075	2	0		0	1
BGIOSGA001076	158	75		164	137
BGIOSGA001077	13	6		8	9
BGIOSGA001078	140	48		95	100
BGIOSGA001079	3184	3266		3196	3513
BGIOSGA001080	93	56		364	525
BGIOSGA001081	223	168		226	327
BGIOSGA001082	24	32		47	17
BGIOSGA001083	3	1		4	1
BGIOSGA001084	63	37		75	101
BGIOSGA001085	638	392		693	849
BGIOSGA001086	492	457		618	551
BGIOSGA001087	1890	1370		1754	1958
BGIOSGA001088	11157	8361		9892	17056
BGIOSGA001089	0	0		1	0
BGIOSGA001090	132	227		128	101
BGIOSGA001091	2	0		0	0
BGIOSGA001092	1154	1527		1113	1727
BGIOSGA001093	37	296		45	1165
BGIOSGA001094	0	0		1	0
BGIOSGA001095	4005	4585		4200	4063
BGIOSGA001097	0	0		0	1
BGIOSGA001099	33827	21879		30180	28213
BGIOSGA001100	15	14		12	20
BGIOSGA001101	1855	1919		1548	1717
BGIOSGA001102	5471	3745		6392	5186
BGIOSGA001103	5	0		1	1
BGIOSGA001104	0	2		0	7
BGIOSGA001105	198	270		332	228
BGIOSGA001106	37	16		12	288
BGIOSGA001107	89	166		90	263
BGIOSGA001108	2611	1790		4378	3308
BGIOSGA001109	164	140		179	540
BGIOSGA001110	1213	377		1437	918
BGIOSGA001111	0	0		1	0
BGIOSGA001113	507	531		426	382
BGIOSGA001114	924	1067		693	735
BGIOSGA001115	0	1		0	1
BGIOSGA001116	263	217		233	152
BGIOSGA001117	1094	2204		1100	4053
BGIOSGA001118	73	73		101	107
BGIOSGA001119	3165	2748		3295	3424
BGIOSGA001120	578	730		607	696
BGIOSGA001121	318	208		384	199
BGIOSGA001122	720	315		983	1606
BGIOSGA001125	49	115		94	162
BGIOSGA001127	738	743		2210	1533
BGIOSGA001128	22	6		7	28
BGIOSGA001130	180	123		114	106
BGIOSGA001131	39	122		43	44
BGIOSGA001132	463	530		583	628
BGIOSGA001133	61	36		77	29
BGIOSGA001134	785	566		512	426
BGIOSGA001135	0	0		0	1
BGIOSGA001137	32	204		86	546
BGIOSGA001138	1	0		0	0
BGIOSGA001139	657	690		641	949
BGIOSGA001140	137	160		135	107
BGIOSGA001141	417	509		676	547
BGIOSGA001142	2	6		8	16
BGIOSGA001143	0	0		0	1
BGIOSGA001144	433	390		766	704
BGIOSGA001145	5	0		0	0
BGIOSGA001147	375	311		280	381
BGIOSGA001148	24	31		335	424
BGIOSGA001149	459	439		667	588
BGIOSGA001150	1703	1310		2012	2062
BGIOSGA001151	384	225		641	781
BGIOSGA001152	7	0		0	4
BGIOSGA001155	8	6		2	32
BGIOSGA001156	0	1		2	1
BGIOSGA001158	3	10		2	7
BGIOSGA001159	230	71		216	112
BGIOSGA001160	1139	863		970	572
BGIOSGA001161	1724	1949		1720	2182
BGIOSGA001162	428	717		619	635
BGIOSGA001163	10	48		17	7
BGIOSGA001165	75	35		99	71
BGIOSGA001167	1	0		1	0
BGIOSGA001168	145	139		210	254
BGIOSGA001169	5081	5199		4660	4622
BGIOSGA001170	467	658		136	735
BGIOSGA001171	1	0		0	1
BGIOSGA001172	1421	1548		457	2803
BGIOSGA001173	2428	2021		2573	3526
BGIOSGA001174	1055	1339		1591	1834
BGIOSGA001175	1515	595		1433	521
BGIOSGA001176	0	1		0	5
BGIOSGA001178	98	138		108	629
BGIOSGA001179	6105	3798		5342	3644
BGIOSGA001180	353	144		1062	58
BGIOSGA001181	635	3997		794	7146
BGIOSGA001182	1	1		2	0
BGIOSGA001183	3127	2511		2998	3499
BGIOSGA001184	693	620		608	570
BGIOSGA001185	3094	2782		4743	2884
BGIOSGA001186	63	45		53	126
BGIOSGA001187	2425	1642		2636	1888
BGIOSGA001188	9	33		33	20
BGIOSGA001189	0	1		0	0
BGIOSGA001190	0	1		0	0
BGIOSGA001191	2507	3243		2088	1830
BGIOSGA001192	1	1		1	2
BGIOSGA001194	982	979		1192	1109
BGIOSGA001195	2247	2056		1974	3114
BGIOSGA001196	893	483		1309	1566
BGIOSGA001197	14	15		16	7
BGIOSGA001198	719	464		689	311
BGIOSGA001199	26	9		28	22
BGIOSGA001200	408	343		438	400
BGIOSGA001201	412	432		546	526
BGIOSGA001202	4309	2778		4095	2785
BGIOSGA001203	5965	3265		4870	2350
BGIOSGA001204	1560	1500		1430	1548
BGIOSGA001206	145	17		190	230
BGIOSGA001207	3185	1942		2956	3517
BGIOSGA001208	3678	2791		4871	3912
BGIOSGA001209	6977	14101		2396	8918
BGIOSGA001210	2197	1781		1826	2290
BGIOSGA001211	1369	1554		1753	1848
BGIOSGA001213	6	8		17	23
BGIOSGA001214	437	299		442	365
BGIOSGA001215	55	61		70	134
BGIOSGA001216	6	7		1	1
BGIOSGA001218	4289	3189		3840	5371
BGIOSGA001219	17	15		28	85
BGIOSGA001220	753	736		862	726
BGIOSGA001221	170	227		157	179
BGIOSGA001223	506	151		466	111
BGIOSGA001224	543	376		425	281
BGIOSGA001225	1611	1641		1633	1933
BGIOSGA001226	2217	1249		2273	1676
BGIOSGA001227	64	79		92	170
BGIOSGA001228	1	0		0	0
BGIOSGA001229	4461	7365		6222	13103
BGIOSGA001230	17	7		27	9
BGIOSGA001231	9	6		7	15
BGIOSGA001233	1559	1208		1295	6295
BGIOSGA001234	148	30		76	678
BGIOSGA001235	7	7		0	17
BGIOSGA001236	64	62		26	28
BGIOSGA001237	2	0		0	0
BGIOSGA001238	0	0		0	2
BGIOSGA001241	1655	1689		4928	3875
BGIOSGA001242	46	104		122	156
BGIOSGA001244	4891	6900		4436	4835
BGIOSGA001246	0	0		3	1
BGIOSGA001247	0	0		1	0
BGIOSGA001248	0	0		1	0
BGIOSGA001249	119	200		149	473
BGIOSGA001250	339	469		407	1242
BGIOSGA001251	1	9		5	17
BGIOSGA001254	763	903		1350	936
BGIOSGA001255	149	126		146	133
BGIOSGA001256	1102	732		1142	1099
BGIOSGA001257	159	305		137	882
BGIOSGA001259	2930	3627		4257	3762
BGIOSGA001260	2	16		9	26
BGIOSGA001262	0	2		1	1
BGIOSGA001263	1	0		2	0
BGIOSGA001264	4	7		2	1
BGIOSGA001265	35	39		9	23
BGIOSGA001266	65	57		26	29
BGIOSGA001267	4	5		2	2
BGIOSGA001268	8	0		0	0
BGIOSGA001269	792	1489		667	1356
BGIOSGA001270	1	2		1	0
BGIOSGA001271	3	22		0	0
BGIOSGA001272	672	935		1079	1708
BGIOSGA001273	23	28		65	212
BGIOSGA001274	83	69		33	128
BGIOSGA001275	47	123		29	44
BGIOSGA001276	1	0		0	1
BGIOSGA001277	118	14		8	27
BGIOSGA001278	1	0		0	0
BGIOSGA001279	133	79		65	45
BGIOSGA001280	2	1		1	1
BGIOSGA001281	1	0		5	1
BGIOSGA001283	373	590		484	980
BGIOSGA001284	4526	3218		4871	4274
BGIOSGA001286	1618	2844		1545	2803
BGIOSGA001287	31	150		44	426
BGIOSGA001288	23	29		9	5
BGIOSGA001294	415	142		206	174
BGIOSGA001295	1	0		0	2
BGIOSGA001297	457	576		718	565
BGIOSGA001298	2	3		3	5
BGIOSGA001299	564	419		634	400
BGIOSGA001300	17	0		5	9
BGIOSGA001302	0	0		0	1
BGIOSGA001305	1	4		0	3
BGIOSGA001306	199	161		202	150
BGIOSGA001307	102	106		185	151
BGIOSGA001308	852	613		703	624
BGIOSGA001310	4	0		0	3
BGIOSGA001311	1970	1903		1872	1790
BGIOSGA001312	77	46		66	78
BGIOSGA001313	340	334		286	173
BGIOSGA001314	940	1627		841	5110
BGIOSGA001315	2639	4106		2679	2605
BGIOSGA001316	751	532		418	1443
BGIOSGA001317	1895	1083		1645	1235
BGIOSGA001318	319	104		332	332
BGIOSGA001320	68	28		105	179
BGIOSGA001321	128	9		79	17
BGIOSGA001322	423	237		616	467
BGIOSGA001323	4936	2943		4304	5715
BGIOSGA001324	16	12		37	4
BGIOSGA001325	1420	556		2287	1080
BGIOSGA001327	15	3		14	35
BGIOSGA001328	2456	1593		2236	1687
BGIOSGA001331	1	1		0	0
BGIOSGA001333	13	12		6	36
BGIOSGA001334	1857	1030		1763	1974
BGIOSGA001335	0	0		0	1
BGIOSGA001336	1	0		1	2
BGIOSGA001337	356	156		346	211
BGIOSGA001338	845	1062		792	710
BGIOSGA001339	0	5		9	4
BGIOSGA001340	1610	1122		1556	1287
BGIOSGA001342	1	2		2	3
BGIOSGA001343	278	279		227	147
BGIOSGA001344	1	0		0	0
BGIOSGA001346	678	201		400	681
BGIOSGA001347	2940	1886		2992	4703
BGIOSGA001348	0	0		0	1
BGIOSGA001349	15	1		16	9
BGIOSGA001350	79	113		78	119
BGIOSGA001351	596	511		450	448
BGIOSGA001352	1084	737		1085	1058
BGIOSGA001353	74	7		13	17
BGIOSGA001354	0	3		6	3
BGIOSGA001355	1	5		2	2
BGIOSGA001356	1	2		1	4
BGIOSGA001357	92	97		95	60
BGIOSGA001358	367	337		348	183
BGIOSGA001359	1101	1100		1138	872
BGIOSGA001360	0	0		0	1
BGIOSGA001363	3987	3014		3906	4323
BGIOSGA001364	751	557		1645	838
BGIOSGA001365	672	486		733	552
BGIOSGA001366	943	1111		1088	805
BGIOSGA001369	0	1		0	0
BGIOSGA001370	896	1675		1624	1734
BGIOSGA001372	39	13		30	50
BGIOSGA001373	23	18		7	11
BGIOSGA001374	1387	660		963	1627
BGIOSGA001375	130	363		97	389
BGIOSGA001376	559	2533		513	4061
BGIOSGA001382	0	2		0	0
BGIOSGA001383	0	5		0	0
BGIOSGA001387	1077	1228		1299	3956
BGIOSGA001388	15242	17876		13913	18822
BGIOSGA001389	41	106		103	110
BGIOSGA001390	141	3		94	26
BGIOSGA001391	15	1		4	3
BGIOSGA001392	130	6		58	10
BGIOSGA001395	24	13		0	0
BGIOSGA001396	18	0		0	0
BGIOSGA001397	2064	2836		1935	2379
BGIOSGA001398	4	5		11	13
BGIOSGA001399	707	498		1002	561
BGIOSGA001400	3011	2182		3198	2883
BGIOSGA001401	0	0		1	0
BGIOSGA001404	3	0		0	0
BGIOSGA001408	1	1		1	9
BGIOSGA001409	3	3		9	0
BGIOSGA001412	1050	763		1078	1104
BGIOSGA001413	4234	2351		4693	4091
BGIOSGA001414	1	0		5	4
BGIOSGA001416	126	117		116	79
BGIOSGA001417	10787	8039		9252	12479
BGIOSGA001419	1753	1263		1567	1556
BGIOSGA001420	119	26		93	47
BGIOSGA001422	1009	783		1437	1132
BGIOSGA001423	63	42		0	5
BGIOSGA001424	374	151		118	702
BGIOSGA001425	52	79		16	33
BGIOSGA001426	86	103		154	73
BGIOSGA001427	716	317		556	444
BGIOSGA001428	96	90		149	138
BGIOSGA001429	988	781		1120	1148
BGIOSGA001430	351	138		192	56
BGIOSGA001431	279	221		391	524
BGIOSGA001432	50	148		57	706
BGIOSGA001433	1324	1692		1614	1669
BGIOSGA001437	123	33		76	114
BGIOSGA001439	12647	18069		13112	37349
BGIOSGA001440	4356	3096		4037	3958
BGIOSGA001441	668	585		578	466
BGIOSGA001442	1283	1161		1000	1246
BGIOSGA001443	2	2		4	2
BGIOSGA001444	273	76		116	248
BGIOSGA001446	5	32		0	1
BGIOSGA001447	0	2		0	0
BGIOSGA001448	660	11		869	528
BGIOSGA001449	61	40		29	34
BGIOSGA001450	626	678		480	450
BGIOSGA001451	862	712		1718	1068
BGIOSGA001452	669	849		751	2255
BGIOSGA001453	231	298		276	239
BGIOSGA001454	501	285		619	1199
BGIOSGA001455	8	92		5	8
BGIOSGA001456	3	65		1	0
BGIOSGA001458	37	22		13	77
BGIOSGA001459	47	47		0	10
BGIOSGA001460	92	26		8	1
BGIOSGA001461	73	19		150	83
BGIOSGA001462	275	224		345	191
BGIOSGA001463	109	89		575	409
BGIOSGA001464	1	1		0	0
BGIOSGA001465	1	0		37	47
BGIOSGA001466	11	19		30	10
BGIOSGA001467	1280	984		1039	1294
BGIOSGA001468	180	62		193	180
BGIOSGA001469	182	171		149	139
BGIOSGA001470	0	13		0	0
BGIOSGA001471	0	0		2	0
BGIOSGA001472	0	1172		0	0
BGIOSGA001474	5	6		0	0
BGIOSGA001475	99	150		160	439
BGIOSGA001476	741	574		480	623
BGIOSGA001477	1003	1219		1058	1531
BGIOSGA001479	1	2		0	2
BGIOSGA001480	16155	9681		13909	40298
BGIOSGA001481	0	0		0	2
BGIOSGA001485	0	0		1	0
BGIOSGA001487	1426	860		1563	1204
BGIOSGA001489	0	1		0	1
BGIOSGA001490	24	5		27	22
BGIOSGA001491	36	26		95	43
BGIOSGA001492	1227	716		1391	1230
BGIOSGA001493	1150	995		1413	1658
BGIOSGA001494	20	12		119	149
BGIOSGA001495	4159	5635		5031	6207
BGIOSGA001496	201	208		173	86
BGIOSGA001497	20	25		21	16
BGIOSGA001498	269	261		286	214
BGIOSGA001499	244	297		424	368
BGIOSGA001500	1	1		0	0
BGIOSGA001501	1	1		1	2
BGIOSGA001503	1468	1200		1636	2000
BGIOSGA001504	451	377		459	197
BGIOSGA001506	1711	1969		2973	2243
BGIOSGA001510	6	1		1	1
BGIOSGA001511	0	1		0	0
BGIOSGA001512	0	1		0	0
BGIOSGA001513	20	8		0	0
BGIOSGA001515	599	549		132	93
BGIOSGA001516	1	5		2	3
BGIOSGA001517	0	9		0	0
BGIOSGA001519	172	120		227	158
BGIOSGA001520	19	5		11	1
BGIOSGA001521	1338	1478		1385	1026
BGIOSGA001522	466	334		311	186
BGIOSGA001523	0	0		5	0
BGIOSGA001524	0	20		0	0
BGIOSGA001525	20	15		5	3
BGIOSGA001529	9	1		1	7
BGIOSGA001531	2	1		3	17
BGIOSGA001533	408	265		612	801
BGIOSGA001535	253	178		107	123
BGIOSGA001536	3501	4830		2811	2748
BGIOSGA001537	1574	1400		1630	1330
BGIOSGA001538	1120	783		1427	1517
BGIOSGA001539	618	684		720	819
BGIOSGA001540	2205	2639		2367	6256
BGIOSGA001541	119	69		129	89
BGIOSGA001542	39	20		1	2
BGIOSGA001543	1464	1213		1411	1153
BGIOSGA001544	1124	1341		1495	1298
BGIOSGA001545	247	83		170	220
BGIOSGA001546	1159	568		1185	521
BGIOSGA001547	1862	2038		1615	2197
BGIOSGA001548	123	246		106	80
BGIOSGA001549	963	1889		304	1421
BGIOSGA001552	15	152		88	220
BGIOSGA001553	1	0		0	0
BGIOSGA001555	1	4		0	0
BGIOSGA001556	1	8		4	49
BGIOSGA001557	520	314		579	1097
BGIOSGA001558	382	535		342	371
BGIOSGA001560	90	46		142	56
BGIOSGA001562	467	488		497	384
BGIOSGA001563	67	45		78	46
BGIOSGA001564	1955	1112		991	1330
BGIOSGA001566	446	269		728	325
BGIOSGA001567	846	1091		441	942
BGIOSGA001568	35	55		53	33
BGIOSGA001569	413	658		367	323
BGIOSGA001572	210	204		247	334
BGIOSGA001573	1622	1492		2041	1665
BGIOSGA001574	1	1		0	0
BGIOSGA001576	126	877		119	851
BGIOSGA001577	2	0		5	1
BGIOSGA001579	90	70		148	86
BGIOSGA001580	862	468		615	481
BGIOSGA001581	7	4		1	7
BGIOSGA001582	5	9		9	3
BGIOSGA001584	0	0		0	1
BGIOSGA001585	440	657		988	590
BGIOSGA001587	136	311		241	486
BGIOSGA001590	255	282		177	200
BGIOSGA001591	1	0		1	1
BGIOSGA001593	130	64		86	270
BGIOSGA001594	12	37		1	0
BGIOSGA001595	13	8		10	0
BGIOSGA001601	0	5		0	0
BGIOSGA001603	17	33		19	2
BGIOSGA001606	2	1		0	0
BGIOSGA001607	4	10		0	9
BGIOSGA001608	17	2		12	2
BGIOSGA001609	2698	2300		2680	2633
BGIOSGA001610	110	184		111	117
BGIOSGA001611	1406	419		552	125
BGIOSGA001613	0	5		4	0
BGIOSGA001614	1104	2025		1020	821
BGIOSGA001615	4389	4414		4495	3311
BGIOSGA001617	0	1		0	0
BGIOSGA001618	59	74		64	84
BGIOSGA001620	13551	3734		10415	4092
BGIOSGA001621	0	0		1	0
BGIOSGA001622	35	15		36	26
BGIOSGA001623	0	3		4	3
BGIOSGA001624	1	11		0	0
BGIOSGA001626	464	115		95	84
BGIOSGA001627	224	96		295	146
BGIOSGA001628	3	1		3	12
BGIOSGA001629	188	121		137	448
BGIOSGA001630	5	0		1	14
BGIOSGA001631	4034	2203		1445	5923
BGIOSGA001632	1	1		2	3
BGIOSGA001633	8098	5318		5739	5039
BGIOSGA001636	2573	2427		2687	2276
BGIOSGA001637	329	315		143	620
BGIOSGA001638	133	112		102	82
BGIOSGA001639	1377	1179		1540	1331
BGIOSGA001640	301	295		293	248
BGIOSGA001641	72	44		87	86
BGIOSGA001642	117	25		72	394
BGIOSGA001643	2	1		3	5
BGIOSGA001644	131	49		79	400
BGIOSGA001646	3	1		0	25
BGIOSGA001647	0	1		0	21
BGIOSGA001648	1	0		0	0
BGIOSGA001652	70	53		48	24
BGIOSGA001657	48	41		75	36
BGIOSGA001658	165	132		242	216
BGIOSGA001659	8	4		10	5
BGIOSGA001660	120	150		76	169
BGIOSGA001661	56	37		17	54
BGIOSGA001662	835	730		695	616
BGIOSGA001663	17110	7087		13239	7809
BGIOSGA001664	37	29		37	33
BGIOSGA001665	0	0		42	15
BGIOSGA001666	1	0		12	1
BGIOSGA001667	14	35		254	260
BGIOSGA001668	8	14		128	103
BGIOSGA001669	40	43		24	25
BGIOSGA001670	7	33		22	16
BGIOSGA001671	99	74		57	38
BGIOSGA001672	5	2		7	12
BGIOSGA001673	1051	528		869	3533
BGIOSGA001674	3284	5282		6090	19789
BGIOSGA001677	8	0		0	0
BGIOSGA001678	438	200		201	205
BGIOSGA001680	353	253		343	455
BGIOSGA001681	1299	1046		1004	1465
BGIOSGA001682	1072	1159		1064	1096
BGIOSGA001683	22	16		65	97
BGIOSGA001684	0	0		1	1
BGIOSGA001685	632	744		457	1543
BGIOSGA001686	173	212		146	531
BGIOSGA001687	319	311		244	671
BGIOSGA001688	2	0		0	6
BGIOSGA001689	445	309		461	401
BGIOSGA001691	1	0		0	2
BGIOSGA001694	2	0		15	0
BGIOSGA001697	1	0		2	0
BGIOSGA001699	1022	1344		1186	2381
BGIOSGA001700	6327	885		6117	220
BGIOSGA001701	7	24		12	46
BGIOSGA001702	60	461		138	816
BGIOSGA001703	26	86		70	252
BGIOSGA001704	284	350		290	394
BGIOSGA001705	1535	1322		1835	1646
BGIOSGA001706	238	203		405	421
BGIOSGA001707	1	9		0	14
BGIOSGA001708	2	52		0	70
BGIOSGA001710	15	28		19	9
BGIOSGA001711	0	0		0	1
BGIOSGA001712	103	186		180	214
BGIOSGA001713	1	7		0	7
BGIOSGA001714	96	67		62	64
BGIOSGA001715	11	12		14	24
BGIOSGA001716	1	1		1	1
BGIOSGA001717	1	0		0	0
BGIOSGA001718	4	0		0	0
BGIOSGA001722	646	807		689	476
BGIOSGA001723	11	2		2	8
BGIOSGA001724	664	655		738	565
BGIOSGA001725	31	7		7	27
BGIOSGA001726	37	18		27	30
BGIOSGA001729	123	170		110	611
BGIOSGA001730	639	425		585	671
BGIOSGA001731	2871	2922		2665	2663
BGIOSGA001732	0	0		16	84
BGIOSGA001734	748	706		664	697
BGIOSGA001739	4215	5559		5038	5168
BGIOSGA001740	34	24		45	35
BGIOSGA001741	1	0		1	0
BGIOSGA001742	25	1		6	15
BGIOSGA001744	77	272		95	394
BGIOSGA001746	2	2		0	1
BGIOSGA001747	705	739		561	910
BGIOSGA001748	12	0		13	2
BGIOSGA001750	571	458		545	411
BGIOSGA001751	12	5		10	2
BGIOSGA001752	7975	5533		7722	7066
BGIOSGA001753	862	919		1156	1111
BGIOSGA001754	107	55		113	117
BGIOSGA001755	9	14		0	0
BGIOSGA001756	5497	5454		6984	6989
BGIOSGA001757	141	167		129	101
BGIOSGA001758	252	138		244	120
BGIOSGA001759	684	654		687	623
BGIOSGA001760	1	13		6	16
BGIOSGA001761	0	1		0	0
BGIOSGA001768	1025	733		869	791
BGIOSGA001769	21061	13031		23617	30808
BGIOSGA001774	296	72		200	155
BGIOSGA001776	778	791		766	770
BGIOSGA001777	0	0		0	3
BGIOSGA001778	0	0		0	1
BGIOSGA001779	9	0		0	35
BGIOSGA001780	0	5		0	1
BGIOSGA001781	0	4		0	10
BGIOSGA001782	22	2		1	41
BGIOSGA001783	1468	964		1370	1001
BGIOSGA001785	837	1124		774	712
BGIOSGA001786	0	1		0	0
BGIOSGA001787	722	903		1026	1540
BGIOSGA001788	258	70		316	380
BGIOSGA001789	686	414		759	765
BGIOSGA001790	2852	2016		2529	2969
BGIOSGA001791	1443	1600		656	2884
BGIOSGA001792	3423	2515		2865	2587
BGIOSGA001793	2497	2225		2132	2012
BGIOSGA001794	221	223		332	454
BGIOSGA001795	6	2		3	30
BGIOSGA001796	1	0		2	1
BGIOSGA001797	684	614		254	2260
BGIOSGA001798	28	15		22	5
BGIOSGA001799	936	689		939	832
BGIOSGA001800	12	36		64	318
BGIOSGA001801	521	323		496	399
BGIOSGA001802	7	0		4	39
BGIOSGA001803	0	0		1	0
BGIOSGA001804	44	43		36	68
BGIOSGA001806	11	2		7	5
BGIOSGA001807	174	77		233	67
BGIOSGA001808	6522	7213		8252	9249
BGIOSGA001810	514	1292		1029	2034
BGIOSGA001811	22	7		7	11
BGIOSGA001812	0	36		0	0
BGIOSGA001813	0	5		0	1
BGIOSGA001814	13	24		8	6
BGIOSGA001816	221	203		224	178
BGIOSGA001817	14	5		3	14
BGIOSGA001818	778	1111		691	452
BGIOSGA001819	4328	3802		4710	3665
BGIOSGA001820	10020	6926		9154	9671
BGIOSGA001821	0	2		0	0
BGIOSGA001822	1	1		0	48
BGIOSGA001823	0	1		0	0
BGIOSGA001825	0	0		3	1
BGIOSGA001826	1	1		0	0
BGIOSGA001827	3	0		0	0
BGIOSGA001828	11	1		0	0
BGIOSGA001829	1100	1073		1154	891
BGIOSGA001830	28	4		33	45
BGIOSGA001831	40	6		57	73
BGIOSGA001832	0	0		1	0
BGIOSGA001834	3	11		4	88
BGIOSGA001835	3	2		6	1
BGIOSGA001837	0	1		0	1
BGIOSGA001838	396	356		402	304
BGIOSGA001839	801	2423		1036	6112
BGIOSGA001840	0	0		0	3
BGIOSGA001841	143	197		24	288
BGIOSGA001842	82	65		8	190
BGIOSGA001844	4	1		4	2
BGIOSGA001845	7700	8455		16859	19457
BGIOSGA001847	0	3		0	2
BGIOSGA001848	11	59		12	76
BGIOSGA001849	2	0		1	0
BGIOSGA001851	720	998		755	875
BGIOSGA001853	3605	3589		2937	3412
BGIOSGA001856	13719	16348		20691	63532
BGIOSGA001858	2606	2870		2532	2372
BGIOSGA001859	2929	3681		3677	3187
BGIOSGA001860	2224	3424		2213	1991
BGIOSGA001861	107	7		275	43
BGIOSGA001862	304	151		159	116
BGIOSGA001863	66	25		15	220
BGIOSGA001864	0	3		0	4
BGIOSGA001865	189	150		186	181
BGIOSGA001866	965	603		762	439
BGIOSGA001867	848	393		1337	755
BGIOSGA001868	16	238		1	12
BGIOSGA001869	0	0		0	32
BGIOSGA001870	139	86		92	150
BGIOSGA001872	1704	473		1874	626
BGIOSGA001873	233	25		217	154
BGIOSGA001874	5	19		13	13
BGIOSGA001875	240	70		282	611
BGIOSGA001876	10621	23688		13670	24814
BGIOSGA001877	448	412		419	738
BGIOSGA001878	249	251		308	175
BGIOSGA001879	14425	10399		19951	15117
BGIOSGA001882	465	567		426	468
BGIOSGA001883	45	37		68	187
BGIOSGA001884	10563	6844		10195	7377
BGIOSGA001885	57	44		157	55
BGIOSGA001886	59	17		68	33
BGIOSGA001887	15	16		13	11
BGIOSGA001888	544	348		147	606
BGIOSGA001889	1144	1098		1100	1074
BGIOSGA001890	1990	1796		2016	1537
BGIOSGA001891	5	2		0	2
BGIOSGA001892	28	44		6	15
BGIOSGA001893	907	554		880	928
BGIOSGA001894	216	1249		393	2890
BGIOSGA001895	1210	1074		1109	1234
BGIOSGA001896	7	26		66	255
BGIOSGA001897	6662	5555		6238	5649
BGIOSGA001898	4661	2050		3786	1703
BGIOSGA001899	940	1167		751	819
BGIOSGA001900	496	773		570	937
BGIOSGA001902	2371	1833		2981	2383
BGIOSGA001903	9934	12448		11835	11127
BGIOSGA001904	539	577		693	1003
BGIOSGA001905	5294	6423		5500	4679
BGIOSGA001906	139	163		144	151
BGIOSGA001907	728	105		1061	564
BGIOSGA001909	1851	1690		2241	2081
BGIOSGA001910	266	309		256	203
BGIOSGA001911	4	9		1	2
BGIOSGA001913	625	549		881	584
BGIOSGA001914	644	607		608	611
BGIOSGA001915	990	922		873	801
BGIOSGA001916	198	193		166	270
BGIOSGA001917	1000	749		696	797
BGIOSGA001918	32	20		38	27
BGIOSGA001919	522	643		685	727
BGIOSGA001920	18	22		7	19
BGIOSGA001921	13	7		11	44
BGIOSGA001922	1295	1011		1359	1041
BGIOSGA001923	1009	1319		964	1175
BGIOSGA001925	2322	1409		2077	1965
BGIOSGA001926	16251	14593		13363	15764
BGIOSGA001927	623	616		784	684
BGIOSGA001928	494	357		522	476
BGIOSGA001929	432	633		626	544
BGIOSGA001930	389	386		378	453
BGIOSGA001931	1327	568		1724	2388
BGIOSGA001932	14	5		13	21
BGIOSGA001933	1112	569		1166	581
BGIOSGA001934	312	271		298	179
BGIOSGA001935	500	583		416	372
BGIOSGA001936	3701	3901		4341	4657
BGIOSGA001937	441	359		414	381
BGIOSGA001938	6	3		8	9
BGIOSGA001939	125	235		151	142
BGIOSGA001940	3404	1571		3390	2573
BGIOSGA001941	3728	1725		2639	2023
BGIOSGA001942	89	15		9	18
BGIOSGA001943	0	1		0	0
BGIOSGA001944	28	62		42	41
BGIOSGA001945	8	15		11	12
BGIOSGA001946	286	154		186	557
BGIOSGA001947	74	87		66	65
BGIOSGA001948	537	1326		1924	2708
BGIOSGA001949	1146	1074		1171	1077
BGIOSGA001950	34	0		0	0
BGIOSGA001951	4118	7275		2379	10798
BGIOSGA001952	1	0		0	1
BGIOSGA001953	707	290		863	505
BGIOSGA001955	2350	1207		1941	1068
BGIOSGA001956	929	759		1320	727
BGIOSGA001958	34	109		121	362
BGIOSGA001959	1371	855		1505	1269
BGIOSGA001960	0	0		0	1
BGIOSGA001961	196	605		221	700
BGIOSGA001962	924	1318		1198	1635
BGIOSGA001963	230	769		326	1171
BGIOSGA001964	2536	780		1858	1303
BGIOSGA001965	1212	1122		1778	1877
BGIOSGA001966	737	465		596	690
BGIOSGA001967	39315	116015		38036	67098
BGIOSGA001968	20843	67276		17987	42712
BGIOSGA001970	3	30		4	49
BGIOSGA001971	306	8		266	6
BGIOSGA001973	3868	3060		3165	4742
BGIOSGA001974	91	128		57	147
BGIOSGA001975	399	55		484	186
BGIOSGA001976	1946	1796		2041	2450
BGIOSGA001977	8023	6942		5527	7617
BGIOSGA001978	2439	1686		2227	3510
BGIOSGA001979	960	823		936	795
BGIOSGA001980	3	2		4	5
BGIOSGA001981	99	76		149	148
BGIOSGA001982	3491	2667		3779	3022
BGIOSGA001983	180	230		192	160
BGIOSGA001984	131	30		249	332
BGIOSGA001986	2	6		1	7
BGIOSGA001988	2	3		3	4
BGIOSGA001989	60	63		74	44
BGIOSGA001991	1662	974		1529	1438
BGIOSGA001992	3650	1574		4473	2174
BGIOSGA001993	170	45		371	28
BGIOSGA001994	1815	164		605	849
BGIOSGA001996	739	848		624	655
BGIOSGA001997	5	6		11	12
BGIOSGA001998	97	177		53	139
BGIOSGA001999	28	183		106	224
BGIOSGA002000	31	13		21	31
BGIOSGA002001	309	98		272	278
BGIOSGA002002	132	2573		494	1386
BGIOSGA002003	23	16		7	5
BGIOSGA002004	30	96		37	400
BGIOSGA002005	391	483		313	407
BGIOSGA002008	1727	1591		1530	2123
BGIOSGA002010	1	0		0	0
BGIOSGA002015	0	0		0	4
BGIOSGA002016	0	1		0	1
BGIOSGA002017	1	1		0	0
BGIOSGA002018	5	0		3	1
BGIOSGA002019	1341	1526		1350	1715
BGIOSGA002020	8	23		21	13
BGIOSGA002021	1137	691		2073	1494
BGIOSGA002022	1288	1109		1192	1623
BGIOSGA002024	98	152		55	373
BGIOSGA002025	0	0		0	2
BGIOSGA002027	3803	2405		2637	5121
BGIOSGA002028	456	275		397	316
BGIOSGA002029	463	310		407	296
BGIOSGA002037	0	0		1	0
BGIOSGA002038	1704	1181		2589	2325
BGIOSGA002039	247	184		368	319
BGIOSGA002040	19	4		21	11
BGIOSGA002041	1	18		3	2
BGIOSGA002044	132	131		157	204
BGIOSGA002045	1232	1495		1738	2082
BGIOSGA002047	293	18		41	13
BGIOSGA002049	2	0		0	0
BGIOSGA002050	1	1		0	1
BGIOSGA002051	19	14		17	9
BGIOSGA002052	884	940		838	806
BGIOSGA002053	7	0		2	1
BGIOSGA002054	4105	2551		5468	2315
BGIOSGA002055	20	18		34	13
BGIOSGA002056	245	224		229	176
BGIOSGA002058	1064	1642		1101	1950
BGIOSGA002060	276	223		352	159
BGIOSGA002061	0	0		0	1
BGIOSGA002062	10	10		31	18
BGIOSGA002063	488	201		541	487
BGIOSGA002064	784	751		775	595
BGIOSGA002065	73	110		88	85
BGIOSGA002066	145	132		143	146
BGIOSGA002067	3267	3587		2763	4488
BGIOSGA002068	6450	4699		6554	5694
BGIOSGA002069	31	25		1	0
BGIOSGA002070	156	184		0	2
BGIOSGA002071	5	0		5	1
BGIOSGA002072	1	0		0	2
BGIOSGA002073	4804	4778		6250	5268
BGIOSGA002074	343	456		583	696
BGIOSGA002075	1	1		1	7
BGIOSGA002076	213	8		35	16
BGIOSGA002077	147	146		152	1018
BGIOSGA002078	572	628		607	547
BGIOSGA002079	863	948		1909	1152
BGIOSGA002080	651	351		1509	2751
BGIOSGA002081	1225	1012		1556	1479
BGIOSGA002082	0	0		9	14
BGIOSGA002083	980	808		1278	909
BGIOSGA002085	659	687		2	4
BGIOSGA002087	175	77		4	2
BGIOSGA002088	5	0		0	0
BGIOSGA002089	365	76		147	43
BGIOSGA002090	11	12		8	28
BGIOSGA002091	62	5		23	14
BGIOSGA002092	333	808		369	492
BGIOSGA002093	13	6		8	19
BGIOSGA002094	1051	1011		945	1125
BGIOSGA002095	124	129		165	146
BGIOSGA002096	117	159		197	243
BGIOSGA002097	199	291		152	247
BGIOSGA002098	1224	1141		632	563
BGIOSGA002099	1983	1336		2574	2237
BGIOSGA002100	153	126		509	486
BGIOSGA002101	614	297		462	371
BGIOSGA002102	423	329		0	2
BGIOSGA002103	506	558		558	603
BGIOSGA002104	247	809		275	655
BGIOSGA002105	627	472		653	747
BGIOSGA002106	92	129		249	159
BGIOSGA002107	9	25		3	18
BGIOSGA002108	467	320		391	190
BGIOSGA002109	543	941		627	688
BGIOSGA002110	66	278		45	43
BGIOSGA002111	121	59		0	0
BGIOSGA002112	490	600		410	876
BGIOSGA002113	1003	1307		988	1119
BGIOSGA002114	719	482		347	270
BGIOSGA002115	154	368		426	260
BGIOSGA002118	788	570		830	449
BGIOSGA002119	1152	1141		1400	1145
BGIOSGA002120	598	527		543	637
BGIOSGA002122	1	1		1	7
BGIOSGA002123	1059	525		2763	1408
BGIOSGA002124	0	11		0	2
BGIOSGA002127	2174	2174		1776	2042
BGIOSGA002128	709	478		1401	752
BGIOSGA002129	287	404		126	939
BGIOSGA002130	5	2		0	45
BGIOSGA002131	0	0		0	2
BGIOSGA002132	119	17		51	100
BGIOSGA002133	67	65		71	178
BGIOSGA002134	1	2		1	82
BGIOSGA002135	0	0		0	2
BGIOSGA002136	74	70		118	109
BGIOSGA002137	252	209		339	415
BGIOSGA002138	790	996		1775	2925
BGIOSGA002139	0	1		0	1
BGIOSGA002140	6	7		5	0
BGIOSGA002141	0	0		0	7
BGIOSGA002142	1	1		4	14
BGIOSGA002143	150	136		94	71
BGIOSGA002144	511	319		621	727
BGIOSGA002145	540	985		455	187
BGIOSGA002146	49	11		45	63
BGIOSGA002147	1	0		1	1
BGIOSGA002148	861	107		483	74
BGIOSGA002149	46	129		40	58
BGIOSGA002150	0	1		1	10
BGIOSGA002151	1684	1287		1702	1438
BGIOSGA002152	1566	623		1941	1239
BGIOSGA002154	117	16		100	110
BGIOSGA002155	2733	1134		4604	3778
BGIOSGA002157	631	330		520	207
BGIOSGA002158	55	53		62	36
BGIOSGA002159	92	113		84	61
BGIOSGA002160	475	262		376	112
BGIOSGA002161	2750	2264		2660	2170
BGIOSGA002162	37	44		70	41
BGIOSGA002164	55	41		52	43
BGIOSGA002167	540	547		554	386
BGIOSGA002168	729	758		1046	1432
BGIOSGA002169	0	1		0	8
BGIOSGA002171	51	55		45	35
BGIOSGA002172	2645	3498		2848	4393
BGIOSGA002173	162	48		170	239
BGIOSGA002174	4	4		3	3
BGIOSGA002175	1815	1229		1641	2188
BGIOSGA002176	1243	1216		1480	3151
BGIOSGA002177	44	54		67	161
BGIOSGA002178	5	0		1	0
BGIOSGA002179	9	0		9	0
BGIOSGA002180	1	0		0	0
BGIOSGA002182	1471	1857		1106	1533
BGIOSGA002184	0	4		1	3
BGIOSGA002185	317	269		397	335
BGIOSGA002186	442	1454		1270	2203
BGIOSGA002187	1460	814		1162	1086
BGIOSGA002189	799	604		709	1574
BGIOSGA002190	18	13		48	61
BGIOSGA002191	210	581		459	1016
BGIOSGA002192	4388	4910		4408	5569
BGIOSGA002193	321	87		314	147
BGIOSGA002194	23	27		6	2
BGIOSGA002195	61	2		9	0
BGIOSGA002196	251	286		311	193
BGIOSGA002197	17	18		34	27
BGIOSGA002198	1424	1618		1399	1376
BGIOSGA002199	293	292		447	422
BGIOSGA002200	9	1		4	4
BGIOSGA002201	36	9		31	9
BGIOSGA002202	2233	2066		2099	1995
BGIOSGA002203	1568	948		2230	1505
BGIOSGA002204	97	581		138	907
BGIOSGA002205	3257	1765		4594	2452
BGIOSGA002206	3	1		1	27
BGIOSGA002207	4055	4726		3037	9457
BGIOSGA002208	637	624		1197	723
BGIOSGA002209	667	1793		1352	5507
BGIOSGA002210	209	210		251	179
BGIOSGA002211	243	238		225	205
BGIOSGA002212	183	16		131	151
BGIOSGA002213	2294	1577		3936	5203
BGIOSGA002214	47	57		72	40
BGIOSGA002215	1565	1680		1192	1779
BGIOSGA002217	2843	5585		2399	3516
BGIOSGA002218	1506	937		1883	1014
BGIOSGA002219	1142	1157		1610	1437
BGIOSGA002220	1117	899		915	1629
BGIOSGA002221	280	76		249	31
BGIOSGA002222	159	166		76	90
BGIOSGA002224	1688	1133		1809	1336
BGIOSGA002225	257	236		215	214
BGIOSGA002226	22	5		8	6
BGIOSGA002227	1885	1843		2400	3698
BGIOSGA002228	0	1		1	2
BGIOSGA002229	15703	15797		11795	35644
BGIOSGA002230	653	542		746	533
BGIOSGA002231	66	51		52	128
BGIOSGA002232	1102	977		988	2189
BGIOSGA002233	161	104		126	370
BGIOSGA002235	4672	4136		3490	10088
BGIOSGA002236	1184	1124		1493	1434
BGIOSGA002237	212	233		312	433
BGIOSGA002238	7263	4734		5828	7293
BGIOSGA002239	992	1065		1010	1185
BGIOSGA002240	0	1		0	0
BGIOSGA002241	532	743		584	515
BGIOSGA002242	8	2		11	27
BGIOSGA002243	110	323		328	323
BGIOSGA002244	1120	625		1765	5551
BGIOSGA002245	22	23		48	87
BGIOSGA002246	12379	28440		16779	8254
BGIOSGA002247	164	136		205	197
BGIOSGA002248	428	253		701	594
BGIOSGA002249	5	1		6	4
BGIOSGA002250	1102	1130		1177	876
BGIOSGA002251	341	265		461	258
BGIOSGA002252	519	601		785	521
BGIOSGA002253	0	2		5	5
BGIOSGA002254	575	325		1065	270
BGIOSGA002255	635	532		562	575
BGIOSGA002256	2360	1763		5353	3328
BGIOSGA002257	390	209		528	570
BGIOSGA002258	2028	1554		2163	2358
BGIOSGA002259	497	91		183	36
BGIOSGA002260	3469	8174		7738	22526
BGIOSGA002261	18	16		28	15
BGIOSGA002262	732	1432		928	1302
BGIOSGA002263	588	496		766	467
BGIOSGA002264	120	88		62	121
BGIOSGA002265	2271	990		1680	960
BGIOSGA002266	175	82		241	87
BGIOSGA002267	1	0		0	0
BGIOSGA002269	0	1		1	0
BGIOSGA002270	304	247		1205	319
BGIOSGA002271	1	0		0	0
BGIOSGA002272	122	121		293	192
BGIOSGA002273	855	755		1337	910
BGIOSGA002274	23	45		61	34
BGIOSGA002275	43	329		22	238
BGIOSGA002276	14	55		7	95
BGIOSGA002278	3	7		7	3
BGIOSGA002279	335	299		452	494
BGIOSGA002280	1159	1393		1937	1410
BGIOSGA002281	3070	1378		2190	2052
BGIOSGA002282	252	230		209	159
BGIOSGA002283	388	280		436	260
BGIOSGA002284	2136	1991		2015	1797
BGIOSGA002285	286	330		444	122
BGIOSGA002286	1260	753		1626	1433
BGIOSGA002288	125	95		135	122
BGIOSGA002289	1805	1899		2132	2407
BGIOSGA002290	69	37		42	48
BGIOSGA002291	14845	28039		11025	26145
BGIOSGA002292	741	702		761	1120
BGIOSGA002293	2117	1761		1981	1184
BGIOSGA002294	1005	814		1113	855
BGIOSGA002295	929	660		864	635
BGIOSGA002298	141	40		97	48
BGIOSGA002299	2566	1066		3306	887
BGIOSGA002300	25	11		31	32
BGIOSGA002301	1613	1011		2541	1288
BGIOSGA002302	1117	499		738	1574
BGIOSGA002303	2358	1919		3048	2699
BGIOSGA002304	544	1130		1771	1502
BGIOSGA002305	3399	3180		3238	3147
BGIOSGA002306	508	135		668	106
BGIOSGA002307	337	16		553	43
BGIOSGA002308	1891	1161		3506	2768
BGIOSGA002309	962	1067		1122	1156
BGIOSGA002310	1361	607		1551	505
BGIOSGA002311	4292	7271		4840	9982
BGIOSGA002312	660	809		543	773
BGIOSGA002313	599	404		519	2238
BGIOSGA002314	60	112		113	137
BGIOSGA002315	381	251		423	422
BGIOSGA002316	7649	6142		7186	8615
BGIOSGA002317	363	212		215	269
BGIOSGA002318	756	1007		1114	885
BGIOSGA002319	57	84		31	61
BGIOSGA002320	190	438		145	241
BGIOSGA002322	776	842		1026	785
BGIOSGA002323	0	0		0	2
BGIOSGA002324	3	7		6	17
BGIOSGA002325	172	120		163	162
BGIOSGA002326	442	284		402	708
BGIOSGA002327	570	394		840	483
BGIOSGA002328	144	134		117	65
BGIOSGA002329	617	610		647	445
BGIOSGA002330	9	16		2	22
BGIOSGA002331	0	0		1	0
BGIOSGA002332	2	1		0	1
BGIOSGA002333	3	0		3	0
BGIOSGA002334	1	0		4	0
BGIOSGA002335	1	0		1	0
BGIOSGA002337	5	1		8	5
BGIOSGA002338	2	0		1	0
BGIOSGA002340	1	0		1	0
BGIOSGA002342	40	42		26	61
BGIOSGA002345	2438	1159		1258	1664
BGIOSGA002346	1	2		0	55
BGIOSGA002347	2313	3410		1620	2673
BGIOSGA002348	2831	6758		3313	15146
BGIOSGA002349	199	406		425	653
BGIOSGA002350	345	254		226	282
BGIOSGA002351	1333	1146		1364	1020
BGIOSGA002352	6	1		13	0
BGIOSGA002353	2	1		2	0
BGIOSGA002354	323	166		384	1342
BGIOSGA002356	76	96		85	115
BGIOSGA002357	74	60		67	41
BGIOSGA002358	4	0		1	1
[truncated: 31,159 more rows]

## Sheet: Housekeeping control genes
Expression levels of housekeeping control genes from RNA-seq data in rice root.
Genes	Gene ID	UniProt	log2.Fold_hange		Signature
		Accession	GNZ (RKN vs mock)	R534 (RKN vs mock)
β-tubulin	BGIOSGA007615	A2X1B6	0.024	0.12	no
β-tubulin	BGIOSGA011667	B8ALG6	0.18	-0.56	no
β-tubulin	BGIOSGA013254	A2XKB0	0.7	0.6	no
ubiquitin	BGIOSGA036976	PF00240	0.39	0.12	no
ubiquitin	BGIOSGA005996	A6N069	-0.94	0.14	no
GAPDH	BGIOSGA011768	A2XC18	-4	-6.4	no
GAPDH	BGIOSGA020719	A2YFZ4	0.96	-0.08	no
eIF-4α	BGIOSGA033102	PF01652	0.26	0.038	no
40S rRNA	BGIOSGA008232	B8AHZ6	0.3	-0.08	no
Actin-1	BGIOSGA013463	A2XLF2	0.3	0.69	no

## Sheet: DEGs Log2FC≥1 and FDR<005
		Different genes expression (DEGs), log2 fold change ≥1 and the False Discovery Rate (FDR) < 0.05
Gene_ID_Guinongzhan	log2.Fold_change.(RKN vs mock)	pvalue	qvalue		Gene_ID_Wushansimiao (R534)	log2.Fold_change.(RKN vs mock)	pvalue	qvalue		Gene_ID_common	R534(RKN vs mock)_log2.Fold_change.	GNZ(RKN vs mock)_log2.Fold_change.
BGIOSGA000010	2.219	1.0599e-13	4.2047e-12		BGIOSGA000010	-2.3588	4.9e-10	2.05e-08		BGIOSGA000010	-2.3588	2.219
BGIOSGA000019	-3.403	0.00033026	0.0035746		BGIOSGA000087	-3.1886	2.99e-12	1.58e-10		BGIOSGA000087	-3.1886	-4.8468
BGIOSGA000023	2.0131	4.9222e-08	1.0922e-06		BGIOSGA000093	1.503	3.85e-12	1.99e-10		BGIOSGA000097	-2.0617	-2.0958
BGIOSGA000075	-1.8042	6.9232e-09	1.7087e-07		BGIOSGA000097	-2.0617	3.81e-06	8.66e-05		BGIOSGA000109	-2.4297	-1.1996
BGIOSGA000076	-5.5665	2.0608e-08	4.8493e-07		BGIOSGA000109	-2.4297	5.54e-23	6.3e-21		BGIOSGA000113	-2.1277	-2.396
BGIOSGA000087	-4.8468	2.1158e-32	2.2487e-30		BGIOSGA000113	-2.1277	0.00012266	0.0020218		BGIOSGA000147	1.0028	1.2668
BGIOSGA000097	-2.0958	0.00021656	0.0024732		BGIOSGA000147	1.0028	1.33e-05	0.00027365		BGIOSGA000176	-3.3235	-3.4026
BGIOSGA000109	-1.1996	0.00026883	0.0029999		BGIOSGA000154	1.6756	9.6e-07	2.45e-05		BGIOSGA000262	1.0991	1.1327
BGIOSGA000113	-2.396	2.6113e-05	0.00036653		BGIOSGA000176	-3.3235	1.64e-70	8.7e-68		BGIOSGA000314	1.0183	1.5433
BGIOSGA000147	1.2668	9.5207e-10	2.5887e-08		BGIOSGA000215	1.4437	3.29e-49	1.04e-46		BGIOSGA000438	1.2035	-1.0934
BGIOSGA000153	-1.2587	2.3277e-05	0.00032945		BGIOSGA000262	1.0991	3.57e-09	1.33e-07		BGIOSGA000440	-3.9594	-4.6636
BGIOSGA000156	-3.409	5.9202e-07	1.1152e-05		BGIOSGA000314	1.0183	1.01e-07	3.05e-06		BGIOSGA000466	-2.5122	-4.3999
BGIOSGA000176	-3.4026	3.4247e-88	1.6718e-85		BGIOSGA000319	-2.9465	1.83e-06	4.45e-05		BGIOSGA000498	-1.7073	-2.6635
BGIOSGA000187	-1.5489	0.00042906	0.0045217		BGIOSGA000339	1.1757	1.04e-05	0.00021891		BGIOSGA000518	-1.0418	1.8677
BGIOSGA000259	-1.7526	5.0309e-06	8.1542e-05		BGIOSGA000369	1.446	5.2e-12	2.64e-10		BGIOSGA000571	-1.3154	-1.3102
BGIOSGA000260	-2.648	4.5717e-07	8.7842e-06		BGIOSGA000378	2.3721	1.34e-23	1.59e-21		BGIOSGA000595	-1.7107	-2.3223
BGIOSGA000262	1.1327	2.5061e-12	8.9002e-11		BGIOSGA000382	-1.5631	9.22e-06	0.00019568		BGIOSGA000601	-1.1403	-2.9352
BGIOSGA000279	-1.0698	2.7629e-12	9.7521e-11		BGIOSGA000438	1.2035	6.76e-10	2.77e-08		BGIOSGA000635	-3.9461	-1.6196
BGIOSGA000290	-1.6327	2.4517e-15	1.0982e-13		BGIOSGA000440	-3.9594	9.82e-08	2.97e-06		BGIOSGA000659	-3.7927	-4.1431
BGIOSGA000314	1.5433	1.9099e-16	9.2451e-15		BGIOSGA000442	-3.1349	6.42e-05	0.0011378		BGIOSGA000689	-3.5823	-5.7122
BGIOSGA000338	1.1204	0.00012995	0.0015766		BGIOSGA000466	-2.5122	5.01e-38	1.18e-35		BGIOSGA000693	-1.7678	-3.5725
BGIOSGA000342	-3.8284	0.00025553	0.0028704		BGIOSGA000498	-1.7073	1.9e-06	4.6e-05		BGIOSGA000719	-2.1127	-2.4637
BGIOSGA000356	-1.8067	1.0371e-05	0.00015864		BGIOSGA000518	-1.0418	1.26e-09	4.99e-08		BGIOSGA000812	2.2055	1.5413
BGIOSGA000374	-2.1382	5.2835e-36	6.4755e-34		BGIOSGA000531	-1.699	1.27e-07	3.76e-06		BGIOSGA000823	-1.3378	-2.8272
BGIOSGA000383	-1.7156	7.6366e-07	1.4163e-05		BGIOSGA000571	-1.3154	3.59e-10	1.53e-08		BGIOSGA000827	-1.388	-1.5821
BGIOSGA000393	-1.2149	2.7362e-05	0.00038257		BGIOSGA000595	-1.7107	9.64e-06	0.00020381		BGIOSGA000837	1.8542	2.5262
BGIOSGA000396	1.4069	0.00028192	0.0031278		BGIOSGA000601	-1.1403	0.00015359	0.0024761		BGIOSGA000856	-1.4871	-1.8216
BGIOSGA000428	-3.0499	4.4927e-36	5.5298e-34		BGIOSGA000620	-1.9228	7.21e-05	0.0012526		BGIOSGA000901	-1.8662	-1.7574
BGIOSGA000435	-4.6871	1.2939e-14	5.4885e-13		BGIOSGA000634	-4.0197	1.33e-15	9.24e-14		BGIOSGA000905	-1.0211	-2.3493
BGIOSGA000438	-1.0934	2.9213e-05	0.00040667		BGIOSGA000635	-3.9461	4.1e-79	2.87e-76		BGIOSGA000957	-4.0259	-3.2484
BGIOSGA000440	-4.6636	1.1406e-06	2.0675e-05		BGIOSGA000659	-3.7927	2.46e-20	2.37e-18		BGIOSGA000958	-3.3723	-2.5367
BGIOSGA000452	-3.8892	8.7573e-05	0.0011014		BGIOSGA000681	3.0039	1.53e-05	0.00031052		BGIOSGA000982	-1.4315	-2.2356
BGIOSGA000466	-4.3999	7.3711e-138	8.1655e-135		BGIOSGA000689	-3.5823	2.7e-08	8.79e-07		BGIOSGA001046	2.1363	2.1928
BGIOSGA000476	1.6467	3.5414e-07	6.9245e-06		BGIOSGA000693	-1.7678	1.38e-23	1.64e-21		BGIOSGA001055	-1.3347	-2.8578
BGIOSGA000481	-2.1195	4.241e-06	6.9601e-05		BGIOSGA000719	-2.1127	6.06e-18	4.96e-16		BGIOSGA001181	-2.7757	-3.1503
BGIOSGA000498	-2.6635	7.1402e-18	3.6855e-16		BGIOSGA000756	-4.166	3.65e-08	1.17e-06		BGIOSGA001209	-1.1367	-1.8765
BGIOSGA000518	1.8677	2.2075e-37	2.8009e-35		BGIOSGA000765	1.3452	2.3e-05	0.00044859		BGIOSGA001376	-2.3015	-2.9652
BGIOSGA000551	-3.7736	0.0004218	0.0044615		BGIOSGA000808	-2.9995	0.00027573	0.0041247		BGIOSGA001576	-2.9207	-2.8186
BGIOSGA000566	3.2895	8.8589e-07	1.6325e-05		BGIOSGA000812	2.2055	5.92e-07	1.58e-05		BGIOSGA001620	1.738	1.3674
BGIOSGA000571	-1.3102	1.6593e-09	4.3927e-08		BGIOSGA000820	1.4475	1.59e-09	6.21e-08		BGIOSGA001700	2.7162	4.8169
BGIOSGA000580	1.0906	0.00032192	0.0034975		BGIOSGA000823	-1.3378	3.2e-08	1.03e-06		BGIOSGA001839	-1.7185	-2.541
BGIOSGA000583	-3.9272	1.567e-10	4.6242e-09		BGIOSGA000827	-1.388	2.9e-26	3.87e-24		BGIOSGA001872	1.7274	1.6015
BGIOSGA000591	-1.2853	2.4784e-08	5.7608e-07		BGIOSGA000837	1.8542	6.27e-32	1.14e-29		BGIOSGA001894	-2.6533	-2.8588
BGIOSGA000595	-2.3223	9.1161e-12	3.0817e-10		BGIOSGA000854	1.437	3.36e-08	1.08e-06		BGIOSGA001898	1.0634	1.1722
BGIOSGA000598	-2.1031	5.1046e-07	9.7238e-06		BGIOSGA000856	-1.4871	1.07e-20	1.05e-18		BGIOSGA001968	-1.8121	-1.228
BGIOSGA000601	-2.9352	4.682e-34	5.3301e-32		BGIOSGA000859	1.3861	4.21e-13	2.38e-11		BGIOSGA001992	1.0919	1.0605
BGIOSGA000605	-1.1179	4.4466e-07	8.5666e-06		BGIOSGA000901	-1.8662	3.55e-05	0.0006667		BGIOSGA002209	-1.5482	-2.0065
BGIOSGA000635	-1.6196	3.7278e-13	1.409e-11		BGIOSGA000905	-1.0211	1.8e-16	1.31e-14		BGIOSGA002246	-1.3216	1.0431
BGIOSGA000645	-1.9375	6.8725e-10	1.9069e-08		BGIOSGA000945	-1.8425	1.06e-07	3.18e-06		BGIOSGA002260	-1.3581	-1.5219
BGIOSGA000657	-1.7137	2.4552e-13	9.44e-12		BGIOSGA000957	-4.0259	9e-35	1.84e-32		BGIOSGA002291	-1.039	-1.2261
BGIOSGA000658	-2.4966	7.4645e-11	2.2823e-09		BGIOSGA000958	-3.3723	2.67e-25	3.4e-23		BGIOSGA002299	1.1457	1.9177
BGIOSGA000659	-4.1431	1.5339e-29	1.3995e-27		BGIOSGA000982	-1.4315	1.59e-13	9.31e-12		BGIOSGA002348	-1.3769	-2.1731
BGIOSGA000660	-2.6516	1.1613e-05	0.00017515		BGIOSGA001006	-1.3337	2.28e-08	7.52e-07		BGIOSGA002446	-1.9445	-3.0682
BGIOSGA000677	-3.3852	8.1278e-36	9.836e-34		BGIOSGA001013	1.5524	9.3e-49	2.86e-46		BGIOSGA002447	2.1149	1.244
BGIOSGA000689	-5.7122	6.1335e-32	6.3091e-30		BGIOSGA001029	-2.9334	0.0001225	0.0020203		BGIOSGA002451	1.4844	1.094
BGIOSGA000693	-3.5725	2.4753e-110	1.828e-107		BGIOSGA001046	2.1363	1.08e-09	4.32e-08		BGIOSGA002492	-2.6675	-2.6636
BGIOSGA000706	-1.1605	1.1553e-06	2.0902e-05		BGIOSGA001055	-1.3347	7.24e-09	2.59e-07		BGIOSGA002503	1.0988	1.6443
BGIOSGA000719	-2.4637	5.8933e-24	4.1603e-22		BGIOSGA001110	1.5644	0.00018981	0.0029778		BGIOSGA002507	1.23	1.5772
BGIOSGA000724	-2.7186	6.5749e-32	6.7392e-30		BGIOSGA001181	-2.7757	1.79e-20	1.73e-18		BGIOSGA002564	3.0318	2.5024
BGIOSGA000747	-1.7877	0.00013395	0.0016196		BGIOSGA001209	-1.1367	2.16e-19	1.97e-17		BGIOSGA002618	-1.843	-2.1091
BGIOSGA000748	-3.2731	0.00019034	0.0022142		BGIOSGA001376	-2.3015	4.16e-11	1.95e-09		BGIOSGA002635	-3.8453	-4.3599
BGIOSGA000753	-4.2723	0.00011133	0.0013679		BGIOSGA001448	5.7853	2.61e-06	6.17e-05		BGIOSGA002640	-1.5128	-2.2742
BGIOSGA000754	-2.1232	0.00025138	0.0028283		BGIOSGA001472	-6.2535	2.76e-10	1.19e-08		BGIOSGA002720	-1.1593	-1.7647
BGIOSGA000795	-3.8199	1.2066e-07	2.5128e-06		BGIOSGA001576	-2.9207	8e-06	0.0001716		BGIOSGA002866	-3.4294	-2.8381
BGIOSGA000812	1.5413	8.1297e-06	0.00012705		BGIOSGA001611	1.625	3.76e-05	0.00070295		BGIOSGA002918	-5.035	-5.3716
BGIOSGA000823	-2.8272	2.5387e-52	5.2603e-50		BGIOSGA001620	1.738	8.53e-41	2.16e-38		BGIOSGA003134	-1.5123	-3.0776
BGIOSGA000826	-1.3144	1.5047e-15	6.8573e-14		BGIOSGA001663	3.15	1.36e-29	2.17e-27		BGIOSGA003277	-3.4896	-1.9791
BGIOSGA000827	-1.5821	2.9372e-28	2.5177e-26		BGIOSGA001663	3.15	1.36e-29	2.17e-27		BGIOSGA003323	-4.9656	-5.134
BGIOSGA000828	-2.0067	1.8365e-24	1.3459e-22		BGIOSGA001700	2.7162	2.59e-32	4.79e-30		BGIOSGA003361	2.1353	2.2668
BGIOSGA000836	-2.4505	1.6182e-20	9.6898e-19		BGIOSGA001839	-1.7185	1.48e-07	4.33e-06		BGIOSGA003571	1.0684	-1.4357
BGIOSGA000837	2.5262	6.8293e-58	1.5611e-55		BGIOSGA001872	1.7274	2.32e-06	5.55e-05		BGIOSGA003576	-3.1279	-2.6333
BGIOSGA000847	1.3521	0.00025133	0.0028283		BGIOSGA001876	-1.2788	2.71e-38	6.48e-36		BGIOSGA003613	1.3275	1.699
BGIOSGA000856	-1.8216	1.0291e-22	6.9578e-21		BGIOSGA001894	-2.6533	4.33e-07	1.18e-05		BGIOSGA003766	1.0187	1.0435
BGIOSGA000885	-1.7774	6.7007e-05	0.00086544		BGIOSGA001898	1.0634	2.58e-08	8.41e-07		BGIOSGA003814	-2.0325	-1.4584
BGIOSGA000901	-1.7574	5.8472e-05	0.0007655		BGIOSGA001907	2.672	6.85e-05	0.0012031		BGIOSGA003832	1.6604	1.5952
BGIOSGA000905	-2.3493	5.9459e-67	1.7839e-64		BGIOSGA001964	1.5794	5.59e-08	1.75e-06		BGIOSGA003836	-1.9488	-2.8054
BGIOSGA000911	-2.6892	1.8448e-60	4.7022e-58		BGIOSGA001967	-1.6827	5.21e-281	3.73e-277		BGIOSGA003837	-2.5221	-3.1857
BGIOSGA000946	-3.9672	1.6778e-05	0.00024431		BGIOSGA001968	-1.8121	9.04e-183	3.24e-179		BGIOSGA003865	-4.838	1.853
BGIOSGA000957	-3.2484	2.5896e-39	3.4854e-37		BGIOSGA001992	1.0919	5.08e-07	1.37e-05		BGIOSGA003885	2.7956	2.2884
BGIOSGA000958	-2.5367	1.2468e-21	7.9804e-20		BGIOSGA001994	3.3466	3.46e-12	1.82e-10		BGIOSGA003912	-3.1278	-2.3316
BGIOSGA000982	-2.2356	7.2183e-32	7.3204e-30		BGIOSGA002002	-4.4064	1.91e-19	1.75e-17		BGIOSGA003983	-1.2518	-2.4227
BGIOSGA000988	-2.334	0.00020702	0.0023812		BGIOSGA002148	2.8868	6.93e-06	0.00015031		BGIOSGA004035	-2.0747	-1.8532
BGIOSGA000995	-1.8042	1.6767e-15	7.6173e-14		BGIOSGA002155	1.1475	6.57e-06	0.00014297		BGIOSGA004099	-1.8538	-1.1248
BGIOSGA001046	2.1928	1.2841e-10	3.8485e-09		BGIOSGA002186	-1.8395	1.84e-05	0.00036681		BGIOSGA004131	1.5603	1.3375
BGIOSGA001055	-2.8578	2.6933e-62	7.1167e-60		BGIOSGA002209	-1.5482	3.07e-05	0.00058642		BGIOSGA004154	1.4952	2.1529
BGIOSGA001060	-1.3303	1.2114e-08	2.9222e-07		BGIOSGA002217	-1.0957	4.18e-08	1.33e-06		BGIOSGA004171	-2.486	-3.2942
BGIOSGA001066	-3.5011	6.3309e-08	1.3751e-06		BGIOSGA002246	-1.3216	3.7e-48	1.12e-45		BGIOSGA004181	-1.8625	-2.435
BGIOSGA001069	-2.4534	3.3633e-10	9.6581e-09		BGIOSGA002260	-1.3581	1.28e-15	8.88e-14		BGIOSGA004200	-2.9623	-3.183
BGIOSGA001093	-4.6746	1.5231e-07	3.1267e-06		BGIOSGA002265	1.0762	8.83e-05	0.0015079		BGIOSGA004221	-2.0456	-3.3326
BGIOSGA001117	-1.8618	1.2556e-08	3.0238e-07		BGIOSGA002281	1.0341	9.59e-06	0.00020315		BGIOSGA004285	1.1999	-1.7795
BGIOSGA001172	-2.5971	8.8495e-10	2.416e-08		BGIOSGA002291	-1.039	1.15e-31	2.05e-29		BGIOSGA004296	-1.3782	-1.6686
BGIOSGA001175	1.4793	3.3561e-05	0.00046073		BGIOSGA002299	1.1457	1.29e-05	0.00026596		BGIOSGA004323	1.1226	1.3714
BGIOSGA001180	4.2142	1.7012e-08	4.036e-07		BGIOSGA002348	-1.3769	1.91e-13	1.11e-11		BGIOSGA004427	-1.4839	-2.0777
BGIOSGA001181	-3.1503	2.6533e-28	2.288e-26		BGIOSGA002446	-1.9445	1.54e-19	1.42e-17		BGIOSGA004437	-2.5846	-4.3307
BGIOSGA001203	1.0709	2.5557e-10	7.4129e-09		BGIOSGA002447	2.1149	8.16e-11	3.72e-09		BGIOSGA004477	1.7453	2.1393
BGIOSGA001209	-1.8765	1.8805e-17	9.569e-16		BGIOSGA002451	1.4844	2.5e-06	5.93e-05		BGIOSGA004493	-1.4406	-1.3145
BGIOSGA001229	-1.0548	1.2764e-08	3.0687e-07		BGIOSGA002458	2.0216	3.63e-05	0.00068015		BGIOSGA004529	-1.7459	-4.0843
BGIOSGA001233	-2.2616	9.3204e-17	4.5732e-15		BGIOSGA002464	-1.2766	1.21e-05	0.00025106		BGIOSGA004540	-3.1694	-6.6651
BGIOSGA001257	-2.667	0.00046541	0.0048515		BGIOSGA002492	-2.6675	7.27e-05	0.0012615		BGIOSGA004554	-1.049	-2.2628
BGIOSGA001314	-2.5835	1.64e-16	7.9654e-15		BGIOSGA002503	1.0988	2.26e-07	6.41e-06		BGIOSGA004601	2.4584	2.0835
BGIOSGA001325	1.1021	1.0434e-05	0.00015952		BGIOSGA002507	1.23	6.21e-07	1.65e-05		BGIOSGA004602	-4.255	-5.0883
BGIOSGA001376	-2.9652	9.7183e-16	4.4929e-14		BGIOSGA002527	1.1768	8.78e-07	2.26e-05		BGIOSGA004611	-1.2767	-1.7343
BGIOSGA001387	-1.587	1.174e-06	2.1214e-05		BGIOSGA002551	3.7687	4.7e-12	2.4e-10		BGIOSGA004616	-1.7692	-2.2689
BGIOSGA001432	-3.611	0.0001999	0.0023104		BGIOSGA002556	-2.0328	5.56e-16	3.97e-14		BGIOSGA004707	2.8537	2.0575
BGIOSGA001439	-1.4905	7.6773e-45	1.2353e-42		BGIOSGA002564	3.0318	4.3e-07	1.17e-05		BGIOSGA004722	2.5987	-3.6732
BGIOSGA001452	-1.5666	0.00029025	0.0032067		BGIOSGA002618	-1.843	0.00014501	0.0023483		BGIOSGA004776	-3.1685	-3.814
BGIOSGA001480	-1.5151	9.1002e-50	1.702e-47		BGIOSGA002635	-3.8453	7.9e-06	0.00016968		BGIOSGA004810	2.1496	4.1677
BGIOSGA001540	-1.3825	1.0028e-07	2.1051e-06		BGIOSGA002640	-1.5128	2.67e-10	1.16e-08		BGIOSGA004820	2.1361	1.0298
BGIOSGA001549	-2.2051	0.00010725	0.0013229		BGIOSGA002690	2.0115	0.00014789	0.0023922		BGIOSGA004840	2.1089	2.207
BGIOSGA001576	-2.8186	0.00036638	0.0039199		BGIOSGA002693	-1.0069	1.24e-15	8.67e-14		BGIOSGA004852	-2.4197	-3.2099
BGIOSGA001620	1.3674	1.1968e-26	9.4696e-25		BGIOSGA002720	-1.1593	0.00013768	0.0022409		BGIOSGA004967	-2.8376	-4.2983
BGIOSGA001631	-2.0156	1.8432e-13	7.174e-12		BGIOSGA002866	-3.4294	2.96e-09	1.12e-07		BGIOSGA005005	-4.2706	-3.4087
BGIOSGA001673	-2.0038	1.545e-08	3.6868e-07		BGIOSGA002918	-5.035	2.73e-138	6.53e-135		BGIOSGA005006	-4.2816	-4.0941
BGIOSGA001674	-1.6805	1.792e-30	1.7148e-28		BGIOSGA002943	-2.5339	1.18e-06	2.96e-05		BGIOSGA005090	1.148	1.2777
BGIOSGA001700	4.8169	1.8915e-43	2.8673e-41		BGIOSGA002954	-1.7495	1.21e-05	0.00025163		BGIOSGA005167	-4.466	-5.3432
BGIOSGA001791	-2.1167	9.1162e-08	1.9335e-06		BGIOSGA003019	1.0347	5.24e-05	0.00094902		BGIOSGA005185	-4.0696	-4.9242
BGIOSGA001797	-3.1338	6.1646e-10	1.7238e-08		BGIOSGA003043	-1.7136	0.00019038	0.0029834		BGIOSGA005257	-4.9299	-5.4279
BGIOSGA001839	-2.541	4.8475e-19	2.6543e-17		BGIOSGA003109	1.0058	3.69e-09	1.37e-07		BGIOSGA005266	-3.8632	-2.8615
BGIOSGA001856	-1.5988	9.7146e-86	4.5129e-83		BGIOSGA003134	-1.5123	1.11e-12	6.17e-11		BGIOSGA005283	-3.3276	-2.6538
BGIOSGA001872	1.6015	6.9438e-07	1.2945e-05		BGIOSGA003215	5.5823	0.00018751	0.0029499		BGIOSGA005376	-1.1501	-2.1965
BGIOSGA001894	-2.8588	3.4725e-11	1.1015e-09		BGIOSGA003277	-3.4896	1.35e-29	2.16e-27		BGIOSGA005463	1.6802	2.4671
BGIOSGA001898	1.1722	4.0186e-09	1.0198e-07		BGIOSGA003323	-4.9656	7.88e-16	5.56e-14		BGIOSGA005495	-2.8159	-4.0233
BGIOSGA001951	-2.1627	7.1525e-26	5.5082e-24		BGIOSGA003342	-5.0829	0.00023209	0.0035573		BGIOSGA005539	-3.0051	-1.2394
BGIOSGA001968	-1.228	1.5131e-34	1.7644e-32		BGIOSGA003361	2.1353	1.72e-05	0.00034438		BGIOSGA005551	-1.1725	-2.0163
BGIOSGA001992	1.0605	1.6879e-09	4.4642e-08		BGIOSGA003364	1.074	1.74e-07	5.03e-06		BGIOSGA005557	-3.3952	-4.2747
BGIOSGA002054	1.2596	1.6085e-13	6.3119e-12		BGIOSGA003377	2.2287	0.00012625	0.0020738		BGIOSGA005591	-2.3848	-1.981
BGIOSGA002077	-2.724	0.00013742	0.0016581		BGIOSGA003411	2.153	0.00025203	0.003818		BGIOSGA005592	-2.1586	-2.1282
BGIOSGA002129	-2.8781	0.00014943	0.0017851		BGIOSGA003498	1.7505	3.82e-20	3.63e-18		BGIOSGA005593	-3.583	-2.9823
BGIOSGA002204	-2.6968	0.00034973	0.0037668		BGIOSGA003571	1.0684	6.1e-06	0.00013355		BGIOSGA005636	-1.9956	-1.845
BGIOSGA002207	-3.6191	1.87e-14	7.86e-13		BGIOSGA003576	-3.1279	9.44e-53	3.38e-50		BGIOSGA005655	-1.6722	-1.3985
BGIOSGA002209	-2.0065	1.5486e-12	5.5754e-11		BGIOSGA003595	-5.9174	3.6e-05	0.00067567		BGIOSGA005657	-2.5502	-2.934
BGIOSGA002229	-1.5758	1.3403e-47	2.3683e-45		BGIOSGA003613	1.3275	2.25e-07	6.38e-06		BGIOSGA005746	-1.2582	-1.7222
BGIOSGA002235	-1.5117	1.3305e-13	5.2493e-12		BGIOSGA003766	1.0187	7.36e-10	3e-08		BGIOSGA005770	-1.3672	-2.1463
BGIOSGA002244	-1.6334	3.2805e-09	8.4062e-08		BGIOSGA003780	3.7098	0.0001915	0.0029945		BGIOSGA005775	-1.0628	-1.9932
BGIOSGA002246	1.0431	6.8345e-31	6.6954e-29		BGIOSGA003781	3.8784	3.95e-06	8.95e-05		BGIOSGA005777	3.109	3.5616
BGIOSGA002254	1.9995	2.4126e-05	0.00034012		BGIOSGA003801	-1.0469	4.79e-07	1.3e-05		BGIOSGA005813	-1.3989	-2.2411
BGIOSGA002260	-1.5219	8.2785e-29	7.3819e-27		BGIOSGA003814	-2.0325	2.13e-12	1.15e-10		BGIOSGA005817	-1.2134	-1.2592
BGIOSGA002270	1.937	9.9889e-06	0.00015328		BGIOSGA003832	1.6604	8.89e-07	2.28e-05		BGIOSGA005838	-3.9826	-3.6965
BGIOSGA002291	-1.2261	1.0411e-21	6.7082e-20		BGIOSGA003836	-1.9488	6.53e-10	2.7e-08		BGIOSGA005855	-1.0805	-1.6593
BGIOSGA002299	1.9177	3.3853e-13	1.2846e-11		BGIOSGA003837	-2.5221	2.1e-38	5.05e-36		BGIOSGA005896	-2.9508	-3.3101
BGIOSGA002306	2.6754	0.00011851	0.0014488		BGIOSGA003865	-4.838	6.43e-26	8.45e-24		BGIOSGA005915	-1.5388	-1.3343
BGIOSGA002307	3.7045	8.0249e-05	0.0010182		BGIOSGA003885	2.7956	1.68e-13	9.81e-12		BGIOSGA005916	-1.5793	-2.3953
BGIOSGA002310	1.6385	4.7993e-06	7.8052e-05		BGIOSGA003897	3.8792	3.29e-13	1.88e-11		BGIOSGA005966	-2.605	-2.155
BGIOSGA002311	-1.0247	1.6489e-06	2.9047e-05		BGIOSGA003912	-3.1278	1.75e-11	8.55e-10		BGIOSGA005995	-2.1189	-2.5158
BGIOSGA002313	-2.0888	3.2035e-06	5.3707e-05		BGIOSGA003983	-1.2518	0.00021124	0.0032623		BGIOSGA005999	-2.425	-2.2271
BGIOSGA002348	-2.1731	7.1031e-36	8.6688e-34		BGIOSGA004035	-2.0747	1.39e-26	1.87e-24		BGIOSGA006005	-2.7315	-3.4726
BGIOSGA002432	1.2046	2.6581e-06	4.5115e-05		BGIOSGA004044	2.1546	2.13e-43	5.75e-41		BGIOSGA006030	-4.4174	-4.838
BGIOSGA002441	-1.8153	5.4145e-11	1.6878e-09		BGIOSGA004050	2.0227	3.86e-05	0.00072022		BGIOSGA006116	3.4865	2.6651
BGIOSGA002446	-3.0682	1.8831e-62	5.022e-60		BGIOSGA004099	-1.8538	3.03e-12	1.6e-10		BGIOSGA006127	2.3355	-2.9565
BGIOSGA002447	1.244	4.1064e-05	0.00055553		BGIOSGA004115	-3.6722	0.00034131	0.0049759		BGIOSGA006132	-1.3349	-1.4743
BGIOSGA002449	1.2741	0.00039822	0.0042385		BGIOSGA004125	-1.3604	1.01e-61	4.43e-59		BGIOSGA006160	-4.2468	-2.8961
BGIOSGA002451	1.094	6.6689e-08	1.4453e-06		BGIOSGA004131	1.5603	2.7e-14	1.72e-12		BGIOSGA006161	-3.0472	-2.2587
BGIOSGA002455	-1.701	0.00026036	0.0029212		BGIOSGA004154	1.4952	1.4e-07	4.11e-06		BGIOSGA006162	-4.5817	-4.0683
BGIOSGA002492	-2.6636	7.8919e-05	0.0010035		BGIOSGA004171	-2.486	3.75e-12	1.95e-10		BGIOSGA006165	-2.6287	-5.5351
BGIOSGA002503	1.6443	3.841e-18	2.0225e-16		BGIOSGA004181	-1.8625	8.86e-21	8.72e-19		BGIOSGA006221	-1.3781	-1.3994
BGIOSGA002507	1.5772	2.4512e-24	1.7783e-22		BGIOSGA004187	1.2757	0.00016408	0.0026216		BGIOSGA006283	-1.6793	-1.7152
BGIOSGA002564	2.5024	6.5056e-07	1.2167e-05		BGIOSGA004200	-2.9623	4.1e-15	2.75e-13		BGIOSGA006315	-2.6433	-2.2221
BGIOSGA002618	-2.1091	4.0447e-10	1.1569e-08		BGIOSGA004210	-1.5157	1.94e-60	8.17e-58		BGIOSGA006348	-3.9309	-4.5309
BGIOSGA002633	1.1416	3.3176e-13	1.2606e-11		BGIOSGA004221	-2.0456	2.02e-08	6.7e-07		BGIOSGA006386	-1.6878	-3.2474
BGIOSGA002634	2.1188	1.5011e-05	0.00022058		BGIOSGA004232	-1.05	2.77e-11	1.32e-09		BGIOSGA006531	1.3228	1.0914
BGIOSGA002635	-4.3599	8.719e-09	2.1282e-07		BGIOSGA004253	-2.0715	3.79e-07	1.04e-05		BGIOSGA006559	-2.4334	-3.2427
BGIOSGA002640	-2.2742	8.0987e-17	3.9942e-15		BGIOSGA004259	3.2501	1.75e-21	1.83e-19		BGIOSGA006602	-1.4155	-3.5915
BGIOSGA002694	-1.7853	9.8994e-06	0.00015199		BGIOSGA004285	1.1999	9e-08	2.73e-06		BGIOSGA006839	2.9013	2.7704
BGIOSGA002704	2.4422	2.0214e-13	7.8568e-12		BGIOSGA004296	-1.3782	1.42e-07	4.16e-06		BGIOSGA006907	-2.0561	-2.1102
BGIOSGA002706	-1.7802	1.7289e-14	7.28e-13		BGIOSGA004310	1.136	0.00012649	0.0020766		BGIOSGA007082	-1.9355	-1.1065
BGIOSGA002708	-1.113	6.0132e-11	1.8603e-09		BGIOSGA004313	1.1724	9.21e-17	6.93e-15		BGIOSGA007175	-3.4549	-3.4807
BGIOSGA002720	-1.7647	1.4833e-05	0.00021853		BGIOSGA004323	1.1226	1.18e-11	5.84e-10		BGIOSGA007252	1.3953	2.9005
BGIOSGA002733	-3.8237	1.7069e-20	1.0179e-18		BGIOSGA004427	-1.4839	3.22e-12	1.7e-10		BGIOSGA007267	1.29	1.4656
BGIOSGA002744	1.7889	1.0719e-09	2.8908e-08		BGIOSGA004437	-2.5846	3.14e-10	1.35e-08		BGIOSGA007372	2.4933	-2.2448
BGIOSGA002861	1.1625	5.9974e-11	1.8586e-09		BGIOSGA004477	1.7453	3.96e-05	0.00073546		BGIOSGA007420	1.916	2.6325
BGIOSGA002866	-2.8381	6.9063e-11	2.1229e-09		BGIOSGA004493	-1.4406	4.5e-09	1.65e-07		BGIOSGA007434	-2.0064	-2.2493
BGIOSGA002869	2.3939	4.7301e-09	1.1857e-07		BGIOSGA004529	-1.7459	1.98e-05	0.00039069		BGIOSGA007605	-2.8513	-3.8083
BGIOSGA002875	-2.4298	1.8877e-08	4.4566e-07		BGIOSGA004540	-3.1694	0.0003353	0.0048957		BGIOSGA007620	1.2173	1.2268
BGIOSGA002880	-2.2889	5.4859e-07	1.0388e-05		BGIOSGA004554	-1.049	2.97e-05	0.00056709		BGIOSGA007623	1.3987	1.0378
BGIOSGA002912	-1.8663	5.1261e-08	1.134e-06		BGIOSGA004601	2.4584	6.77e-08	2.09e-06		BGIOSGA007670	2.4633	-3.3074
BGIOSGA002913	-3.6427	1.3152e-34	1.5398e-32		BGIOSGA004602	-4.255	1.1e-08	3.82e-07		BGIOSGA007804	1.4304	1.1498
BGIOSGA002918	-5.3716	3.8595e-184	7.94e-181		BGIOSGA004611	-1.2767	5.7e-09	2.06e-07		BGIOSGA007805	1.4186	1.0814
BGIOSGA002939	1.6224	9.5245e-06	0.0001467		BGIOSGA004616	-1.7692	7.97e-07	2.07e-05		BGIOSGA007818	1.6746	1.0125
BGIOSGA002986	-1.6231	1.385e-39	1.8729e-37		BGIOSGA004691	1.4291	8.44e-27	1.17e-24		BGIOSGA007853	1.7115	2.3248
BGIOSGA002993	2.1222	1.2712e-09	3.3932e-08		BGIOSGA004703	5.7819	0.00018101	0.0028586		BGIOSGA008018	-2.3404	-1.7853
BGIOSGA003081	-7.515	2.5868e-13	9.9077e-12		BGIOSGA004707	2.8537	1.82e-12	9.85e-11		BGIOSGA008027	1.9033	2.4556
BGIOSGA003134	-3.0776	1.9811e-60	4.9749e-58		BGIOSGA004722	2.5987	2.92e-11	1.38e-09		BGIOSGA008055	-3.5112	-2.9253
BGIOSGA003143	-2.4247	0.00036204	0.0038845		BGIOSGA004775	1.7157	2.54e-21	2.63e-19		BGIOSGA008079	2.8867	3.8997
BGIOSGA003198	2.3311	8.8943e-07	1.6369e-05		BGIOSGA004776	-3.1685	1.16e-26	1.59e-24		BGIOSGA008119	3.1098	3.2262
BGIOSGA003251	1.3482	1.1477e-06	2.079e-05		BGIOSGA004799	1.5851	1.87e-07	5.39e-06		BGIOSGA008174	-2.3673	-2.6004
BGIOSGA003269	1.753	2.9156e-09	7.4979e-08		BGIOSGA004810	2.1496	3.37e-14	2.12e-12		BGIOSGA008194	-1.053	-1.3001
BGIOSGA003277	-1.9791	7.9115e-06	0.00012391		BGIOSGA004820	2.1361	5.35e-10	2.23e-08		BGIOSGA008357	-3.5304	-1.7355
BGIOSGA003323	-5.134	1.6938e-24	1.2445e-22		BGIOSGA004840	2.1089	1.5e-08	5.06e-07		BGIOSGA008383	-2.881	-3.6391
BGIOSGA003344	-2.5596	2.5872e-10	7.4965e-09		BGIOSGA004852	-2.4197	1.18e-12	6.52e-11		BGIOSGA008544	1.2428	1.3499
BGIOSGA003348	-3.927	0.00018572	0.0021675		BGIOSGA004882	1.1544	1.42e-09	5.55e-08		BGIOSGA008619	-2.4697	-1.9355
BGIOSGA003361	2.2668	1.8573e-07	3.7593e-06		BGIOSGA004889	1.1357	2.36e-06	5.62e-05		BGIOSGA008641	1.7244	-2.6842
BGIOSGA003457	-2.916	1.8671e-10	5.4763e-09		BGIOSGA004921	-1.0833	1.15e-11	5.69e-10		BGIOSGA008716	-1.8865	-2.5975
BGIOSGA003516	1.1607	3.1491e-06	5.2918e-05		BGIOSGA004922	2.645	6.04e-18	4.96e-16		BGIOSGA008733	-2.3599	-1.4714
BGIOSGA003571	-1.4357	1.6476e-07	3.3679e-06		BGIOSGA004967	-2.8376	3.39e-06	7.81e-05		BGIOSGA008753	3.637	3.0345
BGIOSGA003576	-2.6333	3.0162e-35	3.575e-33		BGIOSGA004982	1.2409	6.51e-17	4.96e-15		BGIOSGA008785	-3.6875	-3.7682
BGIOSGA003591	1.346	1.0307e-05	0.00015773		BGIOSGA005005	-4.2706	1.19e-14	7.78e-13		BGIOSGA008802	-3.1933	-5.2268
BGIOSGA003613	1.699	2.3845e-13	9.2062e-12		BGIOSGA005006	-4.2816	1.97e-24	2.45e-22		BGIOSGA008804	-5.2628	-5.7114
BGIOSGA003620	-2.0029	0.00013175	0.0015965		BGIOSGA005009	1.3406	5.38e-06	0.00011919		BGIOSGA008883	-1.6775	-1.0948
BGIOSGA003766	1.0435	1.6532e-09	4.3805e-08		BGIOSGA005044	1.085	6.05e-16	4.3e-14		BGIOSGA008911	-4.8369	-4.4908
BGIOSGA003803	1.9448	5.7572e-05	0.00075511		BGIOSGA005090	1.148	6.5e-06	0.00014163		BGIOSGA009043	-2.3428	-1.0552
BGIOSGA003814	-1.4584	1.2195e-05	0.00018285		BGIOSGA005143	-2.7232	3.03e-13	1.73e-11		BGIOSGA009086	-2.2702	-3.9871
BGIOSGA003832	1.5952	4.3424e-08	9.7407e-07		BGIOSGA005164	-2.0565	2.44e-08	8.03e-07		BGIOSGA009093	2.0994	1.6198
BGIOSGA003836	-2.8054	6.4134e-22	4.1603e-20		BGIOSGA005167	-4.466	3.45e-09	1.29e-07		BGIOSGA009117	-1.343	-2.7405
BGIOSGA003837	-3.1857	1.0146e-99	6.2176e-97		BGIOSGA005178	-1.5493	0.00021155	0.0032635		BGIOSGA009121	3.8851	1.8221
BGIOSGA003839	-2.2745	7.09e-08	1.53e-06		BGIOSGA005185	-4.0696	6.71e-07	1.77e-05		BGIOSGA009149	-2.2759	-2.523
BGIOSGA003852	-1.293	6.6184e-05	0.00085635		BGIOSGA005228	-1.9898	9.6e-05	0.0016237		BGIOSGA009170	3.477	2.7262
BGIOSGA003865	1.853	7.9154e-09	1.9419e-07		BGIOSGA005257	-4.9299	3.65e-12	1.9e-10		BGIOSGA009178	-1.9814	-2.3885
BGIOSGA003879	-3.6576	9.3664e-09	2.2804e-07		BGIOSGA005262	-1.4205	5.65e-05	0.0010169		BGIOSGA009183	3.1638	3.9703
BGIOSGA003885	2.2884	3.4391e-10	9.8659e-09		BGIOSGA005264	1.3978	1.6e-12	8.76e-11		BGIOSGA009210	-1.1251	-1.5616
BGIOSGA003912	-2.3316	2.1347e-19	1.1962e-17		BGIOSGA005266	-3.8632	3.48e-10	1.49e-08		BGIOSGA009380	3.2345	-2.8277
BGIOSGA003961	-2.1991	3.9078e-24	2.7791e-22		BGIOSGA005278	1.9825	8.63e-44	2.4e-41		BGIOSGA009399	-4.0151	-1.9067
BGIOSGA003983	-2.4227	4.3247e-12	1.5043e-10		BGIOSGA005283	-3.3276	0	0		BGIOSGA009400	-3.8596	-2.1616
BGIOSGA004016	-1.4688	9.413e-19	5.0581e-17		BGIOSGA005351	1.0419	5.66e-10	2.35e-08		BGIOSGA009502	1.0478	-1.2097
BGIOSGA004017	-1.0949	4.2066e-06	6.9155e-05		BGIOSGA005376	-1.1501	1.12e-07	3.34e-06		BGIOSGA009543	-2.6567	-1.8478
BGIOSGA004018	-1.9918	2.3871e-44	3.6965e-42		BGIOSGA005463	1.6802	0.00012871	0.0021106		BGIOSGA009547	2.0241	2.1129
BGIOSGA004035	-1.8532	4.7981e-30	4.4869e-28		BGIOSGA005495	-2.8159	2e-18	1.7e-16		BGIOSGA009631	7.2436	5.7878
BGIOSGA004049	-4.7322	2.1606e-06	3.7173e-05		BGIOSGA005531	3.9405	4.76e-23	5.43e-21		BGIOSGA009741	-2.1201	-1.38
BGIOSGA004073	-3.6318	9.7026e-20	5.5447e-18		BGIOSGA005539	-3.0051	5.18e-73	3.03e-70		BGIOSGA009755	-3.0709	-3.0402
BGIOSGA004078	-3.4573	1.2947e-06	2.319e-05		BGIOSGA005551	-1.1725	5.6e-07	1.5e-05		BGIOSGA009766	-2.5948	-2.55
BGIOSGA004099	-1.1248	5.2758e-05	0.00069701		BGIOSGA005555	3.5924	4.51e-06	0.00010127		BGIOSGA009773	-1.3112	-2.8647
BGIOSGA004123	2.7441	3.771e-08	8.5522e-07		BGIOSGA005557	-3.3952	2.78e-32	5.11e-30		BGIOSGA009858	-3.3848	-3.4701
BGIOSGA004131	1.3375	1.1833e-08	2.8592e-07		BGIOSGA005581	-1.2896	4.84e-21	4.85e-19		BGIOSGA009886	-2.6461	-3.5603
BGIOSGA004140	-2.0636	3.52e-05	0.00048058		BGIOSGA005588	-1.958	7.04e-07	1.85e-05		BGIOSGA009894	-3.3128	-3.7149
BGIOSGA004154	2.1529	1.0777e-15	4.9583e-14		BGIOSGA005591	-2.3848	1.12e-26	1.53e-24		BGIOSGA010114	-1.5865	-2.0914
BGIOSGA004162	-1.034	4.103e-05	0.00055533		BGIOSGA005592	-2.1586	7.8e-12	3.9e-10		BGIOSGA010142	1.5259	1.0798
BGIOSGA004171	-3.2942	2.8644e-27	2.2981e-25		BGIOSGA005593	-3.583	4.47e-28	6.61e-26		BGIOSGA010171	-2.8972	-2.4489
BGIOSGA004181	-2.435	1.5862e-41	2.3073e-39		BGIOSGA005595	-2.5361	1.1e-05	0.00023021		BGIOSGA010182	1.5507	1.2385
BGIOSGA004200	-3.183	4.8384e-23	3.3219e-21		BGIOSGA005636	-1.9956	8.23e-08	2.51e-06		BGIOSGA010468	-3.4031	-2.8866
BGIOSGA004221	-3.3326	1.8146e-30	1.7306e-28		BGIOSGA005655	-1.6722	4.29e-09	1.58e-07		BGIOSGA010483	-3.2686	-4.2729
BGIOSGA004250	-2.486	0.00025232	0.0028374		BGIOSGA005657	-2.5502	1.77e-26	2.36e-24		BGIOSGA010559	-1.3742	-2.3283
BGIOSGA004262	-1.6971	5.8082e-13	2.1475e-11		BGIOSGA005660	1.3457	1.56e-06	3.82e-05		BGIOSGA010761	-1.4671	-1.8295
BGIOSGA004268	-3.4981	2.9846e-30	2.8277e-28		BGIOSGA005667	1.2843	1.3e-73	7.91e-71		BGIOSGA010857	-2.217	-2.9697
BGIOSGA004269	-2.6672	1.853e-05	0.00026774		BGIOSGA005746	-1.2582	1.72e-06	4.18e-05		BGIOSGA010921	-1.6202	-3.5821
BGIOSGA004285	-1.7795	2.9948e-26	2.3439e-24		BGIOSGA005752	-2.163	5.27e-06	0.00011679		BGIOSGA010945	-1.8265	-4.0864
BGIOSGA004292	-2.056	3.2712e-07	6.4312e-06		BGIOSGA005770	-1.3672	2.75e-06	6.45e-05		BGIOSGA010959	-1.7136	-2.2596
BGIOSGA004296	-1.6686	7.6587e-08	1.6425e-06		BGIOSGA005774	1.6851	1.89e-07	5.44e-06		BGIOSGA011015	-2.0774	-3.7891
BGIOSGA004305	-1.4922	2.412e-05	0.00034012		BGIOSGA005775	-1.0628	1.23e-06	3.07e-05		BGIOSGA011066	-1.7485	-2.2141
BGIOSGA004307	-1.4702	4.8284e-05	0.00064473		BGIOSGA005777	3.109	2.63e-05	0.00050667		BGIOSGA011135	-1.8168	-4.059
BGIOSGA004323	1.3714	2.5577e-14	1.0569e-12		BGIOSGA005809	-3.2774	1.55e-13	9.12e-12		BGIOSGA011140	-2.9215	-4.6646
BGIOSGA004326	-2.7606	6.7087e-08	1.4528e-06		BGIOSGA005813	-1.3989	5.85e-06	0.0001287		BGIOSGA011208	-2.9837	-1.9447
BGIOSGA004339	2.0886	7.6717e-08	1.644e-06		BGIOSGA005817	-1.2134	6.27e-06	0.00013682		BGIOSGA011298	-2.3927	-2.1148
BGIOSGA004352	-2.1374	5.103e-15	2.2303e-13		BGIOSGA005838	-3.9826	1.37e-18	1.18e-16		BGIOSGA011324	-2.5949	-1.7806
BGIOSGA004364	-3.6538	1.0374e-07	2.1684e-06		BGIOSGA005852	-2.1083	3.48e-06	7.98e-05		BGIOSGA011332	-4.8172	-3.6527
BGIOSGA004374	-1.7128	6.2671e-05	0.00081492		BGIOSGA005855	-1.0805	7.66e-05	0.0013237		BGIOSGA011354	1.3834	1.2076
BGIOSGA004427	-2.0777	1.7556e-35	2.0981e-33		BGIOSGA005856	-3.9984	1e-18	8.75e-17		BGIOSGA011433	-3.1945	-3.2963
BGIOSGA004437	-4.3307	1.6046e-27	1.3129e-25		BGIOSGA005896	-2.9508	9.5e-70	4.95e-67		BGIOSGA011504	1.1445	1.309
BGIOSGA004455	-1.9069	2.2458e-13	8.6939e-12		BGIOSGA005912	1.5584	6.49e-09	2.34e-07		BGIOSGA011507	1.2452	1.3924
BGIOSGA004470	-1.9043	9.3167e-06	0.0001438		BGIOSGA005915	-1.5388	1.35e-10	6.06e-09		BGIOSGA011531	-2.4806	-2.5902
BGIOSGA004477	2.1393	4.9657e-05	0.00066091		BGIOSGA005916	-1.5793	0.00011579	0.0019264		BGIOSGA011536	-1.2272	-1.0351
BGIOSGA004480	-1.0672	6.7612e-05	0.00087131		BGIOSGA005966	-2.605	0.00013634	0.0022216		BGIOSGA011542	-2.7707	-3.999
BGIOSGA004485	-3.5552	1.1724e-37	1.5075e-35		BGIOSGA005994	-1.9827	2.39e-08	7.89e-07		BGIOSGA011605	-3.8393	-1.6762
BGIOSGA004493	-1.3145	5.9297e-06	9.504e-05		BGIOSGA005995	-2.1189	9.64e-09	3.37e-07		BGIOSGA011657	4.1679	4.3571
BGIOSGA004522	-2.9345	8.19e-20	4.69e-18		BGIOSGA005999	-2.425	3.06e-31	5.41e-29		BGIOSGA011661	2.1492	2.0044
BGIOSGA004524	-1.9756	2.1581e-26	1.6983e-24		BGIOSGA006005	-2.7315	2.33e-18	1.96e-16		BGIOSGA011664	5.7937	4.8356
BGIOSGA004529	-4.0843	4.8404e-20	2.8164e-18		BGIOSGA006030	-4.4174	3.95e-14	2.47e-12		BGIOSGA011677	-2.6418	-2.6806
BGIOSGA004540	-6.6651	2.1486e-51	4.2679e-49		BGIOSGA006057	-2.5821	1.59e-07	4.63e-06		BGIOSGA011750	-1.8777	-1.848
BGIOSGA004554	-2.2628	8.8104e-31	8.544e-29		BGIOSGA006116	3.4865	4.13e-09	1.52e-07		BGIOSGA011782	2.0056	3.2633
BGIOSGA004562	-1.6707	1.5819e-15	7.1977e-14		BGIOSGA006117	1.0205	1.78e-05	0.00035534		BGIOSGA011838	1.3767	1.1372
BGIOSGA004601	2.0835	5.8654e-05	0.00076719		BGIOSGA006127	2.3355	1.69e-36	3.7e-34		BGIOSGA011983	-2.104	-3.3138
BGIOSGA004602	-5.0883	3.2366e-14	1.326e-12		BGIOSGA006132	-1.3349	1.44e-06	3.57e-05		BGIOSGA011988	-1.6324	-2.2498
BGIOSGA004611	-1.7343	6.424e-13	2.3691e-11		BGIOSGA006159	-3.0997	3.59e-09	1.34e-07		BGIOSGA012007	1.4232	3.6515
BGIOSGA004616	-2.2689	7.3404e-07	1.3631e-05		BGIOSGA006160	-4.2468	1.7e-24	2.12e-22		BGIOSGA012018	-2.6481	-3.5476
BGIOSGA004633	-2.0224	4.4041e-13	1.6517e-11		BGIOSGA006161	-3.0472	1.82e-29	2.86e-27		BGIOSGA012041	-2.2148	-2.0802
BGIOSGA004637	-4.248	2.1279e-05	0.00030385		BGIOSGA006162	-4.5817	9.45e-30	1.53e-27		BGIOSGA012062	2.6765	2.6014
BGIOSGA004673	-3.5723	7.3002e-06	0.00011519		BGIOSGA006165	-2.6287	1.76e-30	2.96e-28		BGIOSGA012069	-1.1389	-2.241
BGIOSGA004674	-1.5207	1.043e-13	4.1436e-12		BGIOSGA006221	-1.3781	2.66e-06	6.27e-05		BGIOSGA012080	-2.2634	-3.6283
BGIOSGA004696	-1.5402	0.00033896	0.0036619		BGIOSGA006283	-1.6793	1.49e-10	6.66e-09		BGIOSGA012169	-2.0752	-1.7996
BGIOSGA004699	-3.8398	5.4111e-19	2.9517e-17		BGIOSGA006284	-3.9451	6.63e-05	0.0011696		BGIOSGA012181	-2.3982	-2.9711
BGIOSGA004705	-3.2767	1.3638e-07	2.8117e-06		BGIOSGA006315	-2.6433	3.55e-37	8.14e-35		BGIOSGA012209	-2.0672	-2.6338
BGIOSGA004707	2.0575	1.4347e-09	3.8157e-08		BGIOSGA006348	-3.9309	2.72e-25	3.45e-23		BGIOSGA012215	2.1266	1.5268
BGIOSGA004722	-3.6732	3.26e-22	2.15e-20		BGIOSGA006349	-2.4844	0.00023547	0.0035957		BGIOSGA012235	-1.0308	-2.935
BGIOSGA004746	-1.7301	7.169e-06	0.00011333		BGIOSGA006386	-1.6878	0.00014407	0.0023357		BGIOSGA012256	-1.7988	-2.2739
BGIOSGA004768	-4.98	5.0455e-25	3.7942e-23		BGIOSGA006504	-1.2617	1.17e-47	3.49e-45		BGIOSGA012259	4.4489	3.9601
BGIOSGA004771	-1.5201	4.6522e-18	2.4318e-16		BGIOSGA006531	1.3228	5.25e-09	1.9e-07		BGIOSGA012278	-1.3517	-2.2339
BGIOSGA004772	-1.3791	5.7683e-05	0.00075621		BGIOSGA006546	1.0634	4.47e-12	2.28e-10		BGIOSGA012309	1.3368	2.1534
BGIOSGA004776	-3.814	1.7562e-40	2.4674e-38		BGIOSGA006559	-2.4334	4.61e-24	5.6e-22		BGIOSGA012326	-1.2509	-1.6699
BGIOSGA004778	-1.6144	2.7221e-16	1.3002e-14		BGIOSGA006602	-1.4155	2.95e-08	9.58e-07		BGIOSGA012357	-1.3178	-2.017
BGIOSGA004805	-2.3489	5.5456e-34	6.2883e-32		BGIOSGA006817	-2.1113	1.24e-07	3.69e-06		BGIOSGA012398	-2.3866	-2.2675
BGIOSGA004809	-5.5803	9.851e-06	0.00015132		BGIOSGA006839	2.9013	1.26e-26	1.72e-24		BGIOSGA012436	2.0792	1.6533
BGIOSGA004810	4.1677	4.7271e-07	9.0623e-06		BGIOSGA006907	-2.0561	3e-21	3.08e-19		BGIOSGA012438	-2.4237	-1.7049
BGIOSGA004820	1.0298	4.2027e-05	0.00056802		BGIOSGA006996	1.2636	5.36e-14	3.29e-12		BGIOSGA012447	-2.1642	-2.6207
BGIOSGA004840	2.207	1.7882e-09	4.7035e-08		BGIOSGA007082	-1.9355	0	0		BGIOSGA012450	-3.2128	-3.084
BGIOSGA004841	-1.45	1.8319e-13	7.1395e-12		BGIOSGA007175	-3.4549	3.32e-20	3.17e-18		BGIOSGA012464	-1.0811	-2.4353
BGIOSGA004843	-1.2288	4.6696e-07	8.9603e-06		BGIOSGA007196	3.2433	0.00016438	0.0026248		BGIOSGA012481	4.5984	2.3099
BGIOSGA004848	-4.9681	9.0571e-08	1.9224e-06		BGIOSGA007217	-1.7999	0.00030158	0.0044625		BGIOSGA012485	-2.0415	-3.4151
BGIOSGA004852	-3.2099	1.1608e-42	1.7322e-40		BGIOSGA007234	-1.4194	0.00016285	0.0026082		BGIOSGA012568	-1.6554	-3.5645
BGIOSGA004862	-1.4714	1.0774e-27	8.9296e-26		BGIOSGA007252	1.3953	4.98e-35	1.03e-32		BGIOSGA012628	-1.7722	-1.0757
BGIOSGA004871	-1.7298	0.00030884	0.0033759		BGIOSGA007267	1.29	0.00013821	0.0022471		BGIOSGA012707	-1.2065	-2.0936
BGIOSGA004902	-1.0558	0.00019885	0.002302		BGIOSGA007372	2.4933	1.17e-08	4.06e-07		BGIOSGA012779	-1.2212	-1.0334
BGIOSGA004906	1.5313	0.00016975	0.0019972		BGIOSGA007420	1.916	0.00010264	0.0017256		BGIOSGA012836	1.1768	2.145
BGIOSGA004908	1.0032	1.656e-05	0.00024162		BGIOSGA007434	-2.0064	1.69e-28	2.54e-26		BGIOSGA013019	-1.6925	-1.0315
BGIOSGA004915	1.388	5.1748e-05	0.00068463		BGIOSGA007514	1.4227	2.69e-05	0.000518		BGIOSGA013093	1.3564	1.3879
BGIOSGA004923	1.7664	2.0564e-11	6.7001e-10		BGIOSGA007596	-3.6359	3.24e-07	8.99e-06		BGIOSGA013211	1.342	1.3393
BGIOSGA004938	-5.0889	0.00023159	0.0026291		BGIOSGA007605	-2.8513	6.06e-29	9.24e-27		BGIOSGA013241	-2.0176	-1.8044
BGIOSGA004967	-4.2983	2.4622e-19	1.3743e-17		BGIOSGA007620	1.2173	1.82e-05	0.00036349		BGIOSGA013300	2.1889	-2.7828
BGIOSGA004971	-2.1832	2.8627e-09	7.3749e-08		BGIOSGA007623	1.3987	3.19e-73	1.91e-70		BGIOSGA013325	-4.4478	-2.801
BGIOSGA004972	-2.7905	6.0883e-20	3.5071e-18		BGIOSGA007656	1.1187	7.88e-13	4.4e-11		BGIOSGA013327	3.0226	2.6811
BGIOSGA004992	-1.192	1.8698e-08	4.4179e-07		BGIOSGA007670	2.4633	2.91e-95	3.09e-92		BGIOSGA013391	-2.1287	-1.6556
BGIOSGA005005	-3.4087	2.9181e-17	1.4771e-15		BGIOSGA007804	1.4304	5.34e-41	1.37e-38		BGIOSGA013426	-2.3478	-3.3552
BGIOSGA005006	-4.0941	2.9858e-32	3.1386e-30		BGIOSGA007805	1.4186	6.5e-20	6.11e-18		BGIOSGA013465	-2.5589	-3.9864
BGIOSGA005007	-3.8298	0.00047818	0.0049631		BGIOSGA007818	1.6746	5.84e-05	0.0010441		BGIOSGA013486	-1.8781	-2.6808
BGIOSGA005014	-1.8774	6.3015e-08	1.3698e-06		BGIOSGA007853	1.7115	7.41e-11	3.39e-09		BGIOSGA013525	1.4597	4.0453
BGIOSGA005017	1.1006	3.5455e-05	0.00048397		BGIOSGA007956	1.297	3.11e-06	7.23e-05		BGIOSGA013533	-3.7917	-3.0681
BGIOSGA005063	1.1167	2.0381e-06	3.5236e-05		BGIOSGA007979	1.2447	0.00029216	0.0043456		BGIOSGA013600	2.3156	2.5211
BGIOSGA005090	1.2777	1.5561e-09	4.1306e-08		BGIOSGA008018	-2.3404	1.35e-13	8e-12		BGIOSGA013607	1.3951	1.0585
BGIOSGA005099	-1.1815	5.781e-12	1.9917e-10		BGIOSGA008027	1.9033	2.36e-08	7.79e-07		BGIOSGA013620	-1.97	-1.5945
BGIOSGA005105	-1.926	1.4707e-22	9.8511e-21		BGIOSGA008055	-3.5112	4.01e-27	5.69e-25		BGIOSGA013690	-1.9338	-3.1038
BGIOSGA005118	-1.4547	9.9012e-05	0.0012292		BGIOSGA008079	2.8867	5.04e-05	0.0009174		BGIOSGA013697	-1.8481	-2.6452
BGIOSGA005120	-2.6384	3.8408e-06	6.3395e-05		BGIOSGA008119	3.1098	5.68e-08	1.77e-06		BGIOSGA013814	-1.7114	-2.157
BGIOSGA005166	-3.329	7.653e-18	3.9432e-16		BGIOSGA008174	-2.3673	0.00012029	0.0019895		BGIOSGA013831	-2.1666	-4.7801
BGIOSGA005167	-5.3432	3.4337e-21	2.1546e-19		BGIOSGA008194	-1.053	4.43e-07	1.21e-05		BGIOSGA013832	-3.5288	-5.5894
BGIOSGA005168	-3.5184	6.1353e-07	1.1542e-05		BGIOSGA008288	-1.1549	5.29e-15	3.53e-13		BGIOSGA014054	1.1544	1.2255
BGIOSGA005185	-4.9242	2.5136e-16	1.2046e-14		BGIOSGA008302	-1.1726	3.36e-09	1.26e-07		BGIOSGA014055	-2.7583	-2.9302
BGIOSGA005196	-1.5383	7.894e-08	1.6904e-06		BGIOSGA008357	-3.5304	4.03e-17	3.12e-15		BGIOSGA014059	-2.9233	-1.8596
BGIOSGA005203	1.2584	2.8122e-08	6.4901e-07		BGIOSGA008363	1.1749	5.08e-09	1.84e-07		BGIOSGA014108	-1.9867	-2.5175
BGIOSGA005257	-5.4279	3.2752e-79	1.3286e-76		BGIOSGA008383	-2.881	9.12e-27	1.26e-24		BGIOSGA014134	-2.8886	-1.6302
BGIOSGA005263	1.719	1.5017e-06	2.6584e-05		BGIOSGA008402	1.0492	1.93e-06	4.66e-05		BGIOSGA014158	2.8303	1.7995
BGIOSGA005266	-2.8615	1.6169e-07	3.3075e-06		BGIOSGA008481	1.1593	1.08e-07	3.23e-06		BGIOSGA014234	-1.4091	-1.6741
BGIOSGA005283	-2.6538	0	0		BGIOSGA008544	1.2428	1.13e-05	0.00023636		BGIOSGA014250	1.122	1.9943
BGIOSGA005340	-3.2682	2.4156e-07	4.8215e-06		BGIOSGA008556	1.4774	2.41e-14	1.55e-12		BGIOSGA014275	4.9303	2.4421
BGIOSGA005376	-2.1965	8.766e-47	1.494e-44		BGIOSGA008564	1.6556	7.66e-108	9.55e-105		BGIOSGA014403	-2.8754	-3.5907
BGIOSGA005401	1.6423	8.1539e-21	4.9546e-19		BGIOSGA008619	-2.4697	3.65e-11	1.72e-09		BGIOSGA014538	-3.2666	-3.2635
BGIOSGA005419	-3.6254	3.1213e-93	1.7288e-90		BGIOSGA008626	1.8863	0.00023963	0.0036533		BGIOSGA014539	1.5567	1.4888
BGIOSGA005458	-5.1789	4.213e-10	1.2026e-08		BGIOSGA008633	-1.0893	8.74e-06	0.00018596		BGIOSGA014541	-3.0087	-3.6924
BGIOSGA005462	-1.451	2.9475e-06	4.9645e-05		BGIOSGA008641	1.7244	0.00029489	0.0043771		BGIOSGA014633	-2.7681	-2.2749
BGIOSGA005463	2.4671	4.5179e-06	7.3725e-05		BGIOSGA008660	-1.6811	2.68e-16	1.95e-14		BGIOSGA014710	-2.0857	-1.9127
BGIOSGA005466	-1.4714	7.4226e-10	2.0438e-08		BGIOSGA008716	-1.8865	1.21e-08	4.16e-07		BGIOSGA014719	-2.1054	-2.9165
BGIOSGA005481	-1.2254	4.2415e-07	8.2099e-06		BGIOSGA008727	2.3894	2.65e-05	0.0005104		BGIOSGA014800	-2.5329	-4.1663
BGIOSGA005486	-6.9423	1.6205e-05	0.00023716		BGIOSGA008733	-2.3599	4.88e-33	9.38e-31		BGIOSGA014893	2.3907	3.0094
BGIOSGA005495	-4.0233	7.424e-62	1.9264e-59		BGIOSGA008753	3.637	8.01e-64	3.7e-61		BGIOSGA014934	-2.9048	-3.9081
BGIOSGA005514	-2.8136	0.00016294	0.0019225		BGIOSGA008780	-2.6251	2.58e-10	1.12e-08		BGIOSGA014945	-2.4893	-3.2227
BGIOSGA005537	2.2007	5.1411e-07	9.7804e-06		BGIOSGA008785	-3.6875	9.81e-32	1.76e-29		BGIOSGA014990	-1.3378	-2.9662
BGIOSGA005539	-1.2394	7.0203e-10	1.9461e-08		BGIOSGA008802	-3.1933	2.78e-21	2.88e-19		BGIOSGA015125	1.1828	1.473
BGIOSGA005545	-2.239	1.3516e-10	4.0341e-09		BGIOSGA008804	-5.2628	4.01e-14	2.49e-12		BGIOSGA015140	1.3784	1.2084
BGIOSGA005551	-2.0163	1.2982e-20	7.8386e-19		BGIOSGA008883	-1.6775	1.68e-14	1.08e-12		BGIOSGA015291	2.5062	4.3621
BGIOSGA005557	-4.2747	4.162e-175	7.0514e-172		BGIOSGA008911	-4.8369	2.11e-06	5.07e-05		BGIOSGA015521	-1.9362	-1.5613
BGIOSGA005584	-3.0061	3.1083e-05	0.00043045		BGIOSGA008983	2.6516	1.27e-07	3.76e-06		BGIOSGA015677	-4.606	-3.6766
BGIOSGA005591	-1.981	2.7458e-19	1.5297e-17		BGIOSGA009043	-2.3428	2.28e-72	1.26e-69		BGIOSGA015687	-2.6153	-3.2835
BGIOSGA005592	-2.1282	6.7169e-05	0.00086675		BGIOSGA009080	-2.4877	4.44e-23	5.11e-21		BGIOSGA015843	1.879	1.7239
BGIOSGA005593	-2.9823	3.5787e-09	9.154e-08		BGIOSGA009086	-2.2702	1.15e-11	5.71e-10		BGIOSGA015955	-1.3287	-2.1927
BGIOSGA005599	-1.9754	3.0362e-20	1.792e-18		BGIOSGA009093	2.0994	1.34e-10	6.01e-09		BGIOSGA015960	-3.3258	-1.5788
BGIOSGA005621	-2.0161	1.6773e-27	1.3686e-25		BGIOSGA009114	-2.0256	3.22e-06	7.44e-05		BGIOSGA016105	2.7585	2.7304
BGIOSGA005636	-1.845	9.5272e-10	2.5887e-08		BGIOSGA009117	-1.343	8.56e-05	0.0014643		BGIOSGA016129	2.373	1.3251
BGIOSGA005648	-3.3261	3.5223e-13	1.3349e-11		BGIOSGA009121	3.8851	4e-07	1.09e-05		BGIOSGA016214	-1.3484	-3.5882
BGIOSGA005649	-4.2966	6.9158e-13	2.5472e-11		BGIOSGA009149	-2.2759	9.63e-24	1.16e-21		BGIOSGA016230	1.2283	1.255
BGIOSGA005652	1.0396	0.00010958	0.0013477		BGIOSGA009170	3.477	0.00013032	0.0021333		BGIOSGA016262	1.4982	2.1652
BGIOSGA005655	-1.3985	3.6942e-08	8.3978e-07		BGIOSGA009178	-1.9814	7.19e-10	2.94e-08		BGIOSGA016280	1.1167	1.5218
BGIOSGA005656	-2.6253	2.5971e-05	0.00036471		BGIOSGA009183	3.1638	8.29e-06	0.00017701		BGIOSGA016287	-1.1152	-1.0753
BGIOSGA005657	-2.934	3.7898e-51	7.4764e-49		BGIOSGA009184	-1.6265	1.41e-13	8.32e-12		BGIOSGA016358	-2.8633	-2.1258
BGIOSGA005668	-5.8561	3.4492e-21	2.1596e-19		BGIOSGA009210	-1.1251	2.91e-19	2.62e-17		BGIOSGA016491	-3.5896	-2.7373
BGIOSGA005729	-1.9751	2.3077e-08	5.3818e-07		BGIOSGA009380	3.2345	1.66e-06	4.05e-05		BGIOSGA016515	-3.3267	-4.0358
BGIOSGA005743	-1.8146	3.3226e-16	1.574e-14		BGIOSGA009399	-4.0151	1.39e-13	8.23e-12		BGIOSGA016624	-1.3574	-2.8226
BGIOSGA005746	-1.7222	1.4633e-11	4.8167e-10		BGIOSGA009400	-3.8596	3.21e-21	3.26e-19		BGIOSGA016651	-1.6873	-1.3763
BGIOSGA005770	-2.1463	1.1736e-11	3.8986e-10		BGIOSGA009425	-2.1266	0.00026519	0.0039963		BGIOSGA016731	-4.0912	-3.7723
BGIOSGA005775	-1.9932	2.6375e-16	1.2619e-14		BGIOSGA009502	1.0478	1.31e-07	3.87e-06		BGIOSGA016734	-1.7513	-2.098
BGIOSGA005777	3.5616	1.868e-06	3.2568e-05		BGIOSGA009523	-5.5411	6.77e-08	2.09e-06		BGIOSGA016784	1.2041	1.3928
BGIOSGA005802	-5.5234	1.4917e-05	0.00021954		BGIOSGA009524	-1.339	3.2e-09	1.21e-07		BGIOSGA016861	-1.3674	-2.6776
BGIOSGA005813	-2.2411	2.8608e-19	1.5876e-17		BGIOSGA009536	-1.6362	1.44e-05	0.00029481		BGIOSGA016863	-1.171	-2.1537
BGIOSGA005817	-1.2592	2.3499e-06	4.0263e-05		BGIOSGA009543	-2.6567	1.46e-17	1.17e-15		BGIOSGA016947	-3.7539	-4.6974
BGIOSGA005822	-1.7023	0.00034984	0.0037668		BGIOSGA009547	2.0241	4.66e-21	4.69e-19		BGIOSGA016950	-4.7294	-4.0301
BGIOSGA005831	-1.0943	1.3818e-06	2.4582e-05		BGIOSGA009572	1.1843	4.79e-33	9.28e-31		BGIOSGA016969	-1.3715	-1.3533
BGIOSGA005837	-1.9203	8.4217e-05	0.0010634		BGIOSGA009619	3.4218	0.00019081	0.002987		BGIOSGA016994	-1.1419	-1.2289
BGIOSGA005838	-3.6965	2.4248e-24	1.7636e-22		BGIOSGA009631	7.2436	1.2e-10	5.41e-09		BGIOSGA016996	-2.4202	-3.7246
BGIOSGA005855	-1.6593	3.6521e-14	1.492e-12		BGIOSGA009700	2.5307	3.72e-147	9.68e-144		BGIOSGA016998	-3.5882	-3.391
BGIOSGA005863	-2.6163	1.0474e-10	3.162e-09		BGIOSGA009741	-2.1201	3.01e-21	3.08e-19		BGIOSGA017088	-2.6928	-2.5844
BGIOSGA005869	-2.4946	3.6489e-269	1.5014e-265		BGIOSGA009755	-3.0709	4.7e-55	1.79e-52		BGIOSGA017219	-1.3831	-2.4774
BGIOSGA005875	-1.6819	0.0002653	0.0029674		BGIOSGA009766	-2.5948	1.41e-66	7.07e-64		BGIOSGA017251	1.6199	2.3938
BGIOSGA005896	-3.3101	2.9912e-77	1.1487e-74		BGIOSGA009773	-1.3112	2.28e-11	1.1e-09		BGIOSGA017285	3.379	3.4132
BGIOSGA005904	1.0951	2.4059e-20	1.4258e-18		BGIOSGA009775	2.2116	1.47e-08	4.98e-07		BGIOSGA017321	-3.5059	-2.8104
BGIOSGA005915	-1.3343	2.6113e-08	6.0364e-07		BGIOSGA009850	1.2435	1.59e-34	3.23e-32		BGIOSGA017326	-3.1642	-6.641
BGIOSGA005916	-2.3953	1.104e-21	7.0974e-20		BGIOSGA009858	-3.3848	1.96e-09	7.56e-08		BGIOSGA017327	-1.6513	-2.1466
BGIOSGA005930	-3.3165	1.7921e-14	7.5351e-13		BGIOSGA009886	-2.6461	2.76e-11	1.32e-09		BGIOSGA017385	-3.5291	-2.1593
BGIOSGA005931	-1.9132	0.000134	0.0016196		BGIOSGA009894	-3.3128	1.54e-13	9.03e-12		BGIOSGA017399	1.4166	1.5151
BGIOSGA005934	1.0073	0.00016197	0.0019143		BGIOSGA009906	-1.2768	1.48e-16	1.1e-14		BGIOSGA017462	-1.7017	-2.9208
BGIOSGA005966	-2.155	8.0581e-05	0.0010211		BGIOSGA010087	-1.7694	3.03e-06	7.05e-05		BGIOSGA017494	5.0887	4.212
BGIOSGA005991	-2.691	2.0975e-09	5.4721e-08		BGIOSGA010114	-1.5865	3.42e-07	9.46e-06		BGIOSGA017604	-3.2813	-3.3798
BGIOSGA005995	-2.5158	4.029e-12	1.4049e-10		BGIOSGA010121	1.4683	7.81e-05	0.0013452		BGIOSGA017630	-2.888	-3.6704
BGIOSGA005998	-1.8639	1.5723e-46	2.6177e-44		BGIOSGA010142	1.5259	3.09e-07	8.58e-06		BGIOSGA017631	-2.8959	-3.1661
BGIOSGA005999	-2.2271	1.4095e-37	1.8043e-35		BGIOSGA010171	-2.8972	1.79e-12	9.7e-11		BGIOSGA017646	-2.1085	-3.1881
BGIOSGA006005	-3.4726	1.7786e-43	2.7104e-41		BGIOSGA010182	1.5507	1.76e-16	1.3e-14		BGIOSGA017709	-1.8862	-2.8053
BGIOSGA006014	-2.6089	2.6185e-11	8.3985e-10		BGIOSGA010291	1.1815	1.14e-44	3.26e-42		BGIOSGA017731	1.4867	1.247
BGIOSGA006030	-4.838	1.0148e-22	6.8771e-21		BGIOSGA010341	-2.9331	3.39e-10	1.45e-08		BGIOSGA017796	-1.6919	-1.8668
BGIOSGA006053	1.1227	2.5002e-06	4.2635e-05		BGIOSGA010431	3.1213	0.00015556	0.002505		BGIOSGA017834	-1.3073	-3.114
BGIOSGA006087	-3.4431	4.0907e-21	2.5557e-19		BGIOSGA010468	-3.4031	1.02e-10	4.65e-09		BGIOSGA017875	-1.3049	-1.9979
BGIOSGA006116	2.6651	0.00013843	0.0016689		BGIOSGA010483	-3.2686	1.76e-08	5.88e-07		BGIOSGA017876	3.5229	-4.2522
BGIOSGA006127	-2.9565	1.4149e-110	1.0725e-107		BGIOSGA010559	-1.3742	3.39e-23	3.95e-21		BGIOSGA017949	-2.0008	-2.3363
BGIOSGA006132	-1.4743	6.0123e-06	9.6203e-05		BGIOSGA010761	-1.4671	4.42e-24	5.39e-22		BGIOSGA017962	-2.5572	-2.7185
BGIOSGA006160	-2.8961	3.0637e-11	9.7828e-10		BGIOSGA010773	-3.0946	8.51e-07	2.19e-05		BGIOSGA018017	-1.3038	-1.1398
BGIOSGA006161	-2.2587	3.5313e-13	1.3365e-11		BGIOSGA010774	-3.6367	2.9e-80	2.19e-77		BGIOSGA018214	2.0347	1.7713
BGIOSGA006162	-4.0683	1.1628e-33	1.3032e-31		BGIOSGA010801	-2.8674	6.85e-05	0.0012031		BGIOSGA018863	-4.25	-5.4869
BGIOSGA006165	-5.5351	1.555e-112	1.2441e-109		BGIOSGA010848	1.6694	0.00012117	0.0020026		BGIOSGA018883	1.9571	2.2857
BGIOSGA006198	-3.1876	2.6043e-45	4.214e-43		BGIOSGA010857	-2.217	1.41e-16	1.05e-14		BGIOSGA018891	-2.9207	-2.8261
BGIOSGA006207	-1.7792	8.8837e-28	7.4165e-26		BGIOSGA010890	2.323	4.84e-07	1.31e-05		BGIOSGA018921	-1.9085	-2.8265
BGIOSGA006208	-2.1031	0.00021459	0.0024555		BGIOSGA010921	-1.6202	6.24e-05	0.0011081		BGIOSGA018922	-2.5863	-3.8449
BGIOSGA006221	-1.3994	8.6348e-06	0.00013421		BGIOSGA010938	1.3191	3.87e-36	8.37e-34		BGIOSGA018938	2.544	1.9902
BGIOSGA006243	-1.7689	2.4802e-08	5.7608e-07		BGIOSGA010945	-1.8265	9.56e-39	2.34e-36		BGIOSGA019032	-1.9744	-1.8926
BGIOSGA006261	-1.4679	6.1806e-07	1.1612e-05		BGIOSGA010959	-1.7136	2.59e-14	1.65e-12		BGIOSGA019054	-3.6436	-2.2841
BGIOSGA006264	-2.7586	4.6112e-08	1.0272e-06		BGIOSGA010964	-1.1244	1.57e-12	8.6e-11		BGIOSGA019108	-2.1922	-2.6995
BGIOSGA006274	-2.1118	6.72e-06	0.00010676		BGIOSGA010968	3.4415	1.47e-06	3.62e-05		BGIOSGA019112	-2.7427	-1.922
BGIOSGA006283	-1.7152	4.1436e-14	1.6856e-12		BGIOSGA010969	1.8446	5.72e-05	0.0010265		BGIOSGA019131	1.4045	1.2588
BGIOSGA006292	-2.8087	5.6049e-43	8.4079e-41		BGIOSGA010998	1.9495	9.08e-07	2.33e-05		BGIOSGA019133	-1.8897	-2.7709
BGIOSGA006299	-5.5657	2.7706e-22	1.8345e-20		BGIOSGA011015	-2.0774	0.00030594	0.0045201		BGIOSGA019160	1.5763	1.2232
BGIOSGA006315	-2.2221	4.9077e-11	1.5381e-09		BGIOSGA011066	-1.7485	3e-19	2.69e-17		BGIOSGA019276	-1.9839	-2.1987
BGIOSGA006323	-2.2593	1.9836e-56	4.2636e-54		BGIOSGA011106	1.5016	5.7e-05	0.0010246		BGIOSGA019277	-3.5338	-3.285
BGIOSGA006330	-2.0556	5.5211e-10	1.556e-08		BGIOSGA011109	1.2471	7.61e-26	9.96e-24		BGIOSGA019291	-2.427	-4.8732
BGIOSGA006348	-4.5309	1.0369e-26	8.2272e-25		BGIOSGA011128	1.3963	3.58e-06	8.19e-05		BGIOSGA019292	-3.3204	-4.5711
BGIOSGA006355	1.1896	1.2897e-07	2.6686e-06		BGIOSGA011132	1.3381	1.28e-10	5.77e-09		BGIOSGA019365	1.7738	1.195
BGIOSGA006365	-2.0702	6.2052e-07	1.1651e-05		BGIOSGA011135	-1.8168	7.82e-50	2.54e-47		BGIOSGA019586	-1.1106	-1.7248
BGIOSGA006386	-3.2474	1.2135e-19	6.8799e-18		BGIOSGA011140	-2.9215	0.0002884	0.0042941		BGIOSGA019596	1.7259	1.046
BGIOSGA006399	-2.4684	9.3073e-15	3.9951e-13		BGIOSGA011160	-1.6196	7.23e-05	0.0012545		BGIOSGA019646	2.9394	-2.7067
BGIOSGA006449	-7.1677	0.00015377	0.0018309		BGIOSGA011193	-2.0588	1.03e-09	4.12e-08		BGIOSGA019909	-1.9092	-2.8418
BGIOSGA006467	-5.5762	0.00025239	0.0028374		BGIOSGA011208	-2.9837	4.85e-14	3e-12		BGIOSGA019942	-3.7641	-1.8727
BGIOSGA006492	-2.3586	2.9092e-31	2.8993e-29		BGIOSGA011258	-1.8314	6.22e-06	0.00013608		BGIOSGA020048	-3.0761	-2.9797
BGIOSGA006502	-2.3361	1.0185e-06	1.8555e-05		BGIOSGA011298	-2.3927	3.52e-12	1.84e-10		BGIOSGA020105	-1.3922	-1.5952
BGIOSGA006505	-2.2586	0.00023203	0.0026332		BGIOSGA011324	-2.5949	5.72e-27	8.07e-25		BGIOSGA020106	-2.6212	-3.1516
BGIOSGA006531	1.0914	3.4731e-07	6.8049e-06		BGIOSGA011332	-4.8172	9.71e-17	7.28e-15		BGIOSGA020160	-2.1536	-2.6055
BGIOSGA006559	-3.2427	2.8781e-34	3.3291e-32		BGIOSGA011335	1.0877	3.3e-07	9.12e-06		BGIOSGA020188	1.8391	1.6717
BGIOSGA006602	-3.5915	5.7126e-72	1.9357e-69		BGIOSGA011354	1.3834	2.74e-17	2.14e-15		BGIOSGA020194	-1.6818	-1.9608
BGIOSGA006646	-3.7047	7.4332e-10	2.0448e-08		BGIOSGA011369	-2.3542	7.04e-05	0.0012301		BGIOSGA020217	-3.0993	-3.8562
BGIOSGA006714	1.0117	7.1462e-08	1.5394e-06		BGIOSGA011417	-1.4369	3.28e-127	5.22e-124		BGIOSGA020243	-3.0563	-1.321
BGIOSGA006724	-4.6319	2.468e-07	4.9192e-06		BGIOSGA011433	-3.1945	3.74e-44	1.06e-41		BGIOSGA020341	-1.1822	-2.2702
BGIOSGA006745	1.0562	0.00027674	0.0030787		BGIOSGA011443	-2.8162	1.41e-32	2.63e-30		BGIOSGA020360	-1.8725	-3.3372
BGIOSGA006753	-1.5319	3.1135e-24	2.2419e-22		BGIOSGA011499	1.2548	1.18e-07	3.52e-06		BGIOSGA020525	-1.6279	-2.1492
BGIOSGA006761	1.257	3.7009e-05	0.00050327		BGIOSGA011504	1.1445	9.18e-05	0.0015615		BGIOSGA020577	1.4078	1.6276
BGIOSGA006839	2.7704	6.709e-18	3.4817e-16		BGIOSGA011507	1.2452	1.14e-05	0.00023849		BGIOSGA020641	-1.77	-2.558
BGIOSGA006846	-2.6371	2.7286e-06	4.6257e-05		BGIOSGA011514	-2.9882	2.8e-09	1.06e-07		BGIOSGA020688	1.4012	3.269
BGIOSGA006891	-3.5161	1.1316e-05	0.00017099		BGIOSGA011531	-2.4806	3.85e-14	2.41e-12		BGIOSGA020778	-3.4454	-2.5781
BGIOSGA006907	-2.1102	5.9932e-29	5.3942e-27		BGIOSGA011536	-1.2272	6.78e-18	5.53e-16		BGIOSGA020819	-1.7681	-1.3754
BGIOSGA006911	-1.9787	1.7392e-11	5.6924e-10		BGIOSGA011542	-2.7707	9.38e-79	6.25e-76		BGIOSGA020825	1.7084	1.5826
BGIOSGA006914	1.0265	1.1639e-07	2.4257e-06		BGIOSGA011605	-3.8393	5.34e-63	2.39e-60		BGIOSGA021047	-2.1263	-1.5771
BGIOSGA006930	-1.3761	9.3967e-41	1.3332e-38		BGIOSGA011657	4.1679	2.6e-67	1.33e-64		BGIOSGA021067	-2.1073	-3.7847
BGIOSGA006970	1.4365	6.2162e-28	5.2659e-26		BGIOSGA011661	2.1492	8.96e-23	1.01e-20		BGIOSGA021154	1.3347	2.6777
BGIOSGA006983	-1.8228	1.158e-07	2.4151e-06		BGIOSGA011664	5.7937	4.63e-88	4.28e-85		BGIOSGA021344	-1.408	-3.7023
BGIOSGA007036	-1.2037	1.3226e-12	4.7978e-11		BGIOSGA011677	-2.6418	1.11e-19	1.03e-17		BGIOSGA021377	1.9335	1.8741
BGIOSGA007049	-1.2044	2.9709e-05	0.00041293		BGIOSGA011686	-2.8808	7.74e-07	2.02e-05		BGIOSGA021426	-1.504	-2.0474
BGIOSGA007082	-1.1065	2.4247e-58	5.587e-56		BGIOSGA011734	2.1418	0.00011618	0.0019316		BGIOSGA021439	1.0497	1.6428
BGIOSGA007161	-1.4176	3.63e-05	0.00049494		BGIOSGA011750	-1.8777	1.27e-05	0.00026226		BGIOSGA021514	-1.8206	-2.3051
BGIOSGA007175	-3.4807	1.2679e-20	7.6721e-19		BGIOSGA011765	1.2183	4.63e-18	3.82e-16		BGIOSGA021518	-1.4691	-2.376
BGIOSGA007181	-1.4429	1.2791e-07	2.6504e-06		BGIOSGA011782	2.0056	1.37e-05	0.00028157		BGIOSGA021616	1.2556	1.2751
BGIOSGA007252	2.9005	1.644e-77	6.3986e-75		BGIOSGA011838	1.3767	2.3e-07	6.52e-06		BGIOSGA021664	1.8575	1.2812
BGIOSGA007262	-2.1873	0.00028154	0.0031248		BGIOSGA011848	1.023	5.69e-05	0.0010227		BGIOSGA021708	-2.5833	-2.4325
BGIOSGA007267	1.4656	9.2558e-07	1.7002e-05		BGIOSGA011956	1.407	4.07e-12	2.09e-10		BGIOSGA021767	-2.9434	-4.0023
BGIOSGA007300	1.6538	3.4821e-06	5.8073e-05		BGIOSGA011979	3.0678	6.39e-06	0.00013949		BGIOSGA021769	2.9346	3.8138
BGIOSGA007345	2.5421	4.4781e-28	3.8159e-26		BGIOSGA011983	-2.104	6.84e-17	5.2e-15		BGIOSGA021876	2.9233	1.4367
BGIOSGA007372	-2.2448	9.6662e-10	2.6215e-08		BGIOSGA011988	-1.6324	5.79e-06	0.00012757		BGIOSGA021980	4.2921	1.8659
BGIOSGA007410	1.2292	4.1674e-160	5.7157e-157		BGIOSGA011998	-3.85	1.85e-06	4.49e-05		BGIOSGA022000	-4.5281	-4.5536
BGIOSGA007420	2.6325	2.5449e-10	7.3888e-09		BGIOSGA012007	1.4232	1.32e-09	5.22e-08		BGIOSGA022017	-3.8589	-2.9017
BGIOSGA007429	-1.3932	2.2192e-15	9.956e-14		BGIOSGA012015	3.0602	3.67e-12	1.91e-10		BGIOSGA022219	-6.1436	-5.4716
BGIOSGA007434	-2.2493	5.1341e-33	5.6226e-31		BGIOSGA012018	-2.6481	2.4e-19	2.19e-17		BGIOSGA022243	-3.1338	-2.7178
BGIOSGA007436	-1.7962	0.00023854	0.0026986		BGIOSGA012041	-2.2148	9.6e-42	2.52e-39		BGIOSGA022244	2.2042	4.1599
BGIOSGA007449	6.4459	1.6296e-05	0.00023825		BGIOSGA012062	2.6765	2.03e-07	5.82e-06		BGIOSGA022272	1.2898	1.7644
BGIOSGA007480	1.2632	1.2744e-07	2.6444e-06		BGIOSGA012069	-1.1389	7.21e-08	2.22e-06		BGIOSGA022375	-1.8621	-2.1035
BGIOSGA007528	-1.9961	1.9571e-05	0.0002817		BGIOSGA012080	-2.2634	8.86e-10	3.58e-08		BGIOSGA022384	-1.1763	-1.3792
BGIOSGA007568	-4.3173	1.3918e-12	5.0233e-11		BGIOSGA012169	-2.0752	1.14e-05	0.00023844		BGIOSGA022398	-1.9361	-1.3129
BGIOSGA007573	1.0801	6.8965e-06	0.00010926		BGIOSGA012181	-2.3982	3.38e-06	7.79e-05		BGIOSGA022460	-2.3089	-1.7077
BGIOSGA007579	-1.4533	6.3062e-06	0.00010055		BGIOSGA012209	-2.0672	8.34e-51	2.81e-48		BGIOSGA022502	-1.8117	-2.6965
BGIOSGA007605	-3.8083	1.145e-65	3.3312e-63		BGIOSGA012212	2.0266	1.29e-07	3.82e-06		BGIOSGA022551	-2.1228	-2.7977
BGIOSGA007620	1.2268	2.5295e-06	4.3083e-05		BGIOSGA012215	2.1266	4.55e-06	0.00010194		BGIOSGA022607	-2.7347	-3.3973
BGIOSGA007623	1.0378	1.6572e-48	3.021e-46		BGIOSGA012228	-3.1417	5.35e-14	3.29e-12		BGIOSGA022608	-1.8048	-4.8051
BGIOSGA007637	-2.3747	8.6235e-24	6.0579e-22		BGIOSGA012235	-1.0308	0.00027924	0.0041729		BGIOSGA022627	-3.1287	-4.5225
BGIOSGA007669	-1.6713	6.9712e-09	1.7184e-07		BGIOSGA012256	-1.7988	1.33e-14	8.61e-13		BGIOSGA022640	-1.345	-1.7599
BGIOSGA007670	-3.3074	1.61e-237	4.64e-234		BGIOSGA012259	4.4489	1.1e-82	9.29e-80		BGIOSGA022659	2.0253	3.1273
BGIOSGA007717	-1.9916	2.4149e-07	4.8215e-06		BGIOSGA012278	-1.3517	6.56e-06	0.00014274		BGIOSGA023032	2.2935	2.1798
BGIOSGA007726	-2.8306	2.4896e-07	4.9521e-06		BGIOSGA012293	-2.5042	1.47e-22	1.66e-20		BGIOSGA023108	5.2254	3.5179
BGIOSGA007732	-1.1153	1.6853e-07	3.44e-06		BGIOSGA012309	1.3368	8.91e-20	8.34e-18		BGIOSGA023222	-1.42	-2.0203
BGIOSGA007804	1.1498	8.0683e-29	7.2169e-27		BGIOSGA012326	-1.2509	3.95e-11	1.85e-09		BGIOSGA023353	1.001	1.1627
BGIOSGA007805	1.0814	4.6057e-13	1.7183e-11		BGIOSGA012357	-1.3178	6.88e-05	0.0012062		BGIOSGA023362	1.2375	1.0003
BGIOSGA007818	1.0125	0.00041639	0.0044108		BGIOSGA012398	-2.3866	4.11e-23	4.77e-21		BGIOSGA023363	-1.5141	-1.7135
BGIOSGA007853	2.3248	1.6914e-26	1.3347e-24		BGIOSGA012406	2.0744	0.00025887	0.0039051		BGIOSGA023429	-1.414	-1.5996
BGIOSGA007854	1.7291	2.1912e-14	9.1201e-13		BGIOSGA012436	2.0792	9.1e-28	1.32e-25		BGIOSGA023482	-3.5079	-3.2156
BGIOSGA007875	-2.2067	0.00031826	0.0034643		BGIOSGA012438	-2.4237	1.73e-25	2.22e-23		BGIOSGA023530	1.6846	2.0045
BGIOSGA007879	-2.6822	2.6994e-12	9.5633e-11		BGIOSGA012447	-2.1642	3.93e-56	1.56e-53		BGIOSGA023617	-1.5284	-2.9364
BGIOSGA007920	3.0445	6.8353e-05	0.00088006		BGIOSGA012450	-3.2128	5.87e-10	2.44e-08		BGIOSGA023624	1.7591	1.4233
BGIOSGA007926	-3.4356	5.0127e-20	2.9049e-18		BGIOSGA012464	-1.0811	1.71e-05	0.00034417		BGIOSGA023626	3.5635	2.764
BGIOSGA008018	-1.7853	3.1293e-06	5.2615e-05		BGIOSGA012481	4.5984	2.97e-07	8.28e-06		BGIOSGA023647	-1.4984	-1.9368
BGIOSGA008027	2.4556	1.6378e-08	3.892e-07		BGIOSGA012485	-2.0415	3.41e-17	2.66e-15		BGIOSGA023660	-1.4706	-2.1283
BGIOSGA008055	-2.9253	1.7271e-25	1.3125e-23		BGIOSGA012500	2.0945	1.08e-19	1.01e-17		BGIOSGA023664	3.2028	3.546
BGIOSGA008063	-1.6654	4.9676e-07	9.4871e-06		BGIOSGA012552	1.0499	0.00020952	0.0032408		BGIOSGA023694	-1.0353	-1.8242
BGIOSGA008079	3.8997	7.7242e-06	0.00012124		BGIOSGA012568	-1.6554	4.89e-06	0.00010914		BGIOSGA023704	-4.3022	-4.3797
BGIOSGA008090	-1.3409	7.1204e-12	2.4241e-10		BGIOSGA012628	-1.7722	7e-37	1.56e-34		BGIOSGA023979	-2.1909	-3.2038
BGIOSGA008104	-2.1206	2.4659e-06	4.2076e-05		BGIOSGA012647	1.0631	9.38e-14	5.65e-12		BGIOSGA024059	-1.868	-2.7742
BGIOSGA008119	3.2262	1.0144e-05	0.00015533		BGIOSGA012707	-1.2065	3.43e-06	7.88e-05		BGIOSGA024062	-1.4536	-2.3362
BGIOSGA008122	-2.6923	0.00044153	0.0046379		BGIOSGA012779	-1.2212	1.65e-23	1.95e-21		BGIOSGA024088	-2.1477	-2.4422
BGIOSGA008148	-1.7209	0.00028213	0.003129		BGIOSGA012784	1.2754	3.29e-13	1.88e-11		BGIOSGA024123	-2.312	-3.9279
BGIOSGA008174	-2.6004	5.6227e-12	1.9395e-10		BGIOSGA012823	-1.9693	1.34e-21	1.41e-19		BGIOSGA024167	1.1525	3.4457
BGIOSGA008177	-1.7176	2.8648e-06	4.8346e-05		BGIOSGA012836	1.1768	3.78e-26	5.02e-24		BGIOSGA024200	-1.519	-1.5142
BGIOSGA008194	-1.3001	9.817e-08	2.071e-06		BGIOSGA012837	1.4401	1.18e-54	4.46e-52		BGIOSGA024225	-1.3368	-1.4078
BGIOSGA008199	-2.0969	1.194e-15	5.4762e-14		BGIOSGA012852	1.1103	3.2e-08	1.03e-06		BGIOSGA024325	1.6902	2.3574
BGIOSGA008212	-1.5214	0.00010141	0.0012563		BGIOSGA013019	-1.6925	4.62e-18	3.82e-16		BGIOSGA024403	1.6507	1.3854
BGIOSGA008261	3.4377	3.6837e-07	7.164e-06		BGIOSGA013088	3.0809	1.31e-08	4.49e-07		BGIOSGA024414	-7.8809	-5.5455
BGIOSGA008278	-3.6646	0.00017893	0.0020931		BGIOSGA013093	1.3564	2.79e-06	6.54e-05		BGIOSGA024440	2.0327	-1.0662
BGIOSGA008300	-2.0748	1.43e-27	1.18e-25		BGIOSGA013211	1.342	8.21e-22	8.84e-20		BGIOSGA024535	1.2332	1.1529
BGIOSGA008338	-1.877	3.6538e-07	7.1123e-06		BGIOSGA013235	1.8119	0.00014269	0.0023159		BGIOSGA024616	1.3101	1.0907
BGIOSGA008342	-1.9206	1.1745e-14	5.0116e-13		BGIOSGA013241	-2.0176	1.71e-05	0.00034275		BGIOSGA024622	3.9432	4.2895
BGIOSGA008343	1.2108	1.4577e-46	2.4409e-44		BGIOSGA013266	3.8099	0.00019975	0.0031099		BGIOSGA024671	-1.2986	-2.0391
BGIOSGA008357	-1.7355	2.6918e-05	0.0003769		BGIOSGA013300	2.1889	8.47e-06	0.00018032		BGIOSGA024730	-1.6495	-1.4752
BGIOSGA008375	4.7447	2.2351e-08	5.2296e-07		BGIOSGA013325	-4.4478	1.09e-29	1.75e-27		BGIOSGA024807	-3.7295	-3.1811
BGIOSGA008383	-3.6391	6.41e-59	1.5258e-56		BGIOSGA013327	3.0226	7.59e-07	1.98e-05		BGIOSGA024825	1.7627	2.1343
BGIOSGA008385	-1.2882	3.46e-24	2.479e-22		BGIOSGA013365	1.0621	1.31e-08	4.49e-07		BGIOSGA024842	-4.3354	-4.1546
BGIOSGA008502	-1.5924	1.9806e-06	3.4282e-05		BGIOSGA013391	-2.1287	2.07e-54	7.7e-52		BGIOSGA024843	-2.7897	-3.1301
BGIOSGA008524	-1.6026	3.8407e-12	1.3425e-10		BGIOSGA013426	-2.3478	1.02e-11	5.1e-10		BGIOSGA024866	1.9209	1.6727
BGIOSGA008543	2.6471	4.9932e-11	1.5598e-09		BGIOSGA013440	1.2676	4.36e-35	9.05e-33		BGIOSGA025003	-2.8487	-2.283
BGIOSGA008544	1.3499	4.245e-09	1.0734e-07		BGIOSGA013465	-2.5589	1.15e-13	6.84e-12		BGIOSGA025077	8.8413	5.4797
BGIOSGA008546	-2.681	4.9724e-11	1.555e-09		BGIOSGA013479	-1.3391	3.14e-06	7.29e-05		BGIOSGA025169	-2.5736	-4.8438
BGIOSGA008598	-3.2374	1.7399e-09	4.5934e-08		BGIOSGA013486	-1.8781	5.23e-07	1.4e-05		BGIOSGA025203	-1.1789	-3.0207
BGIOSGA008607	-1.225	8.5907e-31	8.3874e-29		BGIOSGA013495	-2.4957	3.82e-12	1.98e-10		BGIOSGA025204	-1.2406	-3.1387
BGIOSGA008609	-1.0223	2.9616e-13	1.1313e-11		BGIOSGA013502	1.1238	5.91e-07	1.57e-05		BGIOSGA025211	1.0039	1.1668
BGIOSGA008619	-1.9355	0.00027229	0.0030338		BGIOSGA013516	1.6377	0.00013373	0.0021842		BGIOSGA025264	1.6676	1.2605
BGIOSGA008632	-3.275	2.684e-09	6.9332e-08		BGIOSGA013525	1.4597	1.39e-17	1.11e-15		BGIOSGA025321	-1.6002	-2.7761
BGIOSGA008640	-4.6959	1.5426e-11	5.0719e-10		BGIOSGA013533	-3.7917	2.89e-131	5.52e-128		BGIOSGA025334	5.1961	5.0253
BGIOSGA008641	-2.6842	1.2191e-06	2.1948e-05		BGIOSGA013535	-1.3858	1.97e-08	6.56e-07		BGIOSGA025410	-1.1785	-2.5947
BGIOSGA008647	-1.6005	9.2546e-06	0.00014308		BGIOSGA013570	1.5056	3.8e-08	1.22e-06		BGIOSGA025423	2.1596	3.1523
BGIOSGA008650	-1.1177	7.5539e-06	0.00011883		BGIOSGA013600	2.3156	4.87e-07	1.32e-05		BGIOSGA025495	-2.464	-1.8027
BGIOSGA008662	1.4387	1.0067e-09	2.7252e-08		BGIOSGA013607	1.3951	8.9e-13	4.96e-11		BGIOSGA025531	1.4447	1.7741
BGIOSGA008665	-1.4165	9.8936e-08	2.083e-06		BGIOSGA013620	-1.97	1.24e-15	8.67e-14		BGIOSGA025694	3.4882	3.3876
BGIOSGA008689	-2.2102	2.7442e-12	9.6981e-11		BGIOSGA013629	-2.2591	0.00032508	0.0047708		BGIOSGA025902	-1.8923	-3.6994
BGIOSGA008704	-2.0116	1.6621e-06	2.9243e-05		BGIOSGA013646	1.2893	1.41e-09	5.52e-08		BGIOSGA025925	-3.5693	-3.1164
BGIOSGA008716	-2.5975	3.126e-14	1.2844e-12		BGIOSGA013690	-1.9338	4.39e-09	1.61e-07		BGIOSGA025958	-4.5286	-4.1412
BGIOSGA008732	-1.1106	1.1819e-05	0.00017757		BGIOSGA013697	-1.8481	2.24e-19	2.04e-17		BGIOSGA025989	-1.1886	-1.8859
BGIOSGA008733	-1.4714	1.0122e-18	5.4289e-17		BGIOSGA013720	-1.51	2e-50	6.67e-48		BGIOSGA026014	-2.2541	-2.1243
BGIOSGA008753	3.0345	1.8697e-61	4.8081e-59		BGIOSGA013729	-1.0273	0.00016661	0.0026545		BGIOSGA026022	-2.0792	-3.4957
BGIOSGA008760	1.0335	5.3248e-121	4.9472e-118		BGIOSGA013775	2.8609	2.41e-07	6.8e-06		BGIOSGA026040	-2.0497	-2.1745
BGIOSGA008765	-1.7774	1.1435e-09	3.0666e-08		BGIOSGA013814	-1.7114	5.96e-47	1.76e-44		BGIOSGA026049	-3.057	-1.4371
BGIOSGA008785	-3.7682	2.7791e-21	1.7515e-19		BGIOSGA013831	-2.1666	0.00024724	0.0037576		BGIOSGA026104	-1.0498	-1.126
BGIOSGA008789	1.8089	4.9601e-06	8.0439e-05		BGIOSGA013832	-3.5288	4.78e-14	2.96e-12		BGIOSGA026212	-2.193	-4.8295
BGIOSGA008799	-2.3355	8.8376e-06	0.00013722		BGIOSGA013882	-1.2225	0.00010214	0.001719		BGIOSGA026219	-1.0136	-1.4867
BGIOSGA008802	-5.2268	1.0967e-103	7.1786e-101		BGIOSGA013903	1.9619	2.59e-07	7.28e-06		BGIOSGA026337	1.5144	2.0832
BGIOSGA008804	-5.7114	7.1704e-12	2.4383e-10		BGIOSGA013939	1.5067	0.00014981	0.0024206		BGIOSGA026374	1.5959	-1.0402
BGIOSGA008823	-1.3621	0.00015632	0.0018574		BGIOSGA014038	-1.6037	1.85e-85	1.66e-82		BGIOSGA026388	6.8353	4.7124
BGIOSGA008829	-1.2371	0.00019982	0.0023104		BGIOSGA014054	1.1544	7.32e-12	3.66e-10		BGIOSGA026389	3.8646	4.6493
BGIOSGA008848	-1.4098	5.0494e-05	0.00067051		BGIOSGA014055	-2.7583	1.48e-15	1.02e-13		BGIOSGA026390	2.5925	4.247
BGIOSGA008858	-1.324	1.0288e-06	1.873e-05		BGIOSGA014059	-2.9233	2.23e-72	1.25e-69		BGIOSGA026398	-1.2704	-2.1717
BGIOSGA008867	-2.7702	5.5378e-20	3.2028e-18		BGIOSGA014088	1.211	1.63e-22	1.82e-20		BGIOSGA026405	1.2313	1.3076
BGIOSGA008868	-2.4601	0.00026412	0.0029565		BGIOSGA014108	-1.9867	2.09e-20	2.02e-18		BGIOSGA026530	2.1548	7.8296
BGIOSGA008883	-1.0948	0.00024371	0.0027516		BGIOSGA014116	1.3616	4.29e-05	0.00079092		BGIOSGA026567	-1.4862	-3.5037
BGIOSGA008885	-1.2557	0.00032093	0.0034907		BGIOSGA014122	-1.6806	1.63e-65	7.78e-63		BGIOSGA026643	1.4675	1.2865
BGIOSGA008911	-4.4908	6.8324e-15	2.9636e-13		BGIOSGA014134	-2.8886	3.89e-36	8.37e-34		BGIOSGA026677	1.6836	1.3547
BGIOSGA008945	-1.696	3.571e-06	5.9247e-05		BGIOSGA014151	-1.7372	8.4e-06	0.00017907		BGIOSGA026749	-1.5327	-2.474
BGIOSGA008952	2.4404	6.2318e-08	1.3556e-06		BGIOSGA014158	2.8303	1.12e-08	3.88e-07		BGIOSGA026786	-2.6227	-3.9185
BGIOSGA008974	-2.1444	0.00023309	0.0026441		BGIOSGA014182	1.7121	1.39e-08	4.75e-07		BGIOSGA026800	-1.7644	-2.3955
BGIOSGA008993	1.7356	0.00029779	0.0032774		BGIOSGA014207	1.8074	9.93e-07	2.52e-05		BGIOSGA026879	-2.5335	-2.9149
BGIOSGA008996	-1.8346	7.229e-16	3.3582e-14		BGIOSGA014213	1.7684	2.06e-83	1.79e-80		BGIOSGA027012	-2.3869	-2.9665
BGIOSGA009019	-1.5422	7.9966e-09	1.9602e-07		BGIOSGA014234	-1.4091	0.00032266	0.0047425		BGIOSGA027060	-2.0126	-3.681
BGIOSGA009041	1.4735	1.7646e-07	3.5816e-06		BGIOSGA014250	1.122	3.54e-07	9.74e-06		BGIOSGA027198	1.0276	1.2215
BGIOSGA009042	4.2449	9.8266e-05	0.001221		BGIOSGA014273	2.762	2.29e-05	0.00044666		BGIOSGA027394	2.1719	1.7509
BGIOSGA009043	-1.0552	3.4783e-12	1.2187e-10		BGIOSGA014274	3.4009	1.35e-05	0.0002792		BGIOSGA027464	1.0616	1.6727
BGIOSGA009045	-2.7613	3.6693e-14	1.4969e-12		BGIOSGA014275	4.9303	6.56e-10	2.7e-08		BGIOSGA027488	1.625	1.8617
BGIOSGA009061	1.4607	3.7292e-07	7.2475e-06		BGIOSGA014276	4.3134	1.9e-05	0.0003771		BGIOSGA027772	-2.0593	-1.7858
BGIOSGA009078	-2.4207	1.1609e-19	6.5948e-18		BGIOSGA014374	-1.0691	0.00032396	0.0047567		BGIOSGA027773	-1.5957	-2.0069
BGIOSGA009084	-3.0861	1.0098e-84	4.5444e-82		BGIOSGA014393	1.0895	2.29e-10	1e-08		BGIOSGA027778	-2.1535	-2.5094
BGIOSGA009086	-3.9871	1.7828e-33	1.9673e-31		BGIOSGA014403	-2.8754	5.1e-30	8.4e-28		BGIOSGA027782	-3.1784	-3.8661
BGIOSGA009093	1.6198	4.7457e-05	0.00063486		BGIOSGA014451	-1.0113	2.32e-05	0.00045151		BGIOSGA027959	-2.7956	-5.3334
BGIOSGA009117	-2.7405	1.8789e-15	8.4909e-14		BGIOSGA014466	1.5436	3.97e-05	0.0007381		BGIOSGA027960	-2.256	-4.6319
BGIOSGA009118	-2.902	0.00048035	0.0049838		BGIOSGA014483	2.3799	2.08e-05	0.00040905		BGIOSGA028019	2.2094	-2.4606
BGIOSGA009121	1.8221	7.3802e-05	0.00094431		BGIOSGA014500	5.9682	4.66e-15	3.11e-13		BGIOSGA028181	-2.3353	-3.438
BGIOSGA009149	-2.523	4.9281e-27	3.9319e-25		BGIOSGA014531	-5.6911	1.89e-15	1.29e-13		BGIOSGA028621	1.0818	1.1123
BGIOSGA009170	2.7262	0.0002529	0.0028419		BGIOSGA014536	-3.344	7.41e-09	2.64e-07		BGIOSGA028631	-2.9101	-3.1978
BGIOSGA009178	-2.3885	7.1032e-16	3.3104e-14		BGIOSGA014538	-3.2666	1.61e-09	6.26e-08		BGIOSGA028658	-1.6634	-1.4055
BGIOSGA009181	-1.5526	3.4259e-34	3.9469e-32		BGIOSGA014539	1.5567	1.9e-07	5.47e-06		BGIOSGA028700	1.3916	2.1818
BGIOSGA009183	3.9703	2.744e-05	0.00038347		BGIOSGA014541	-3.0087	3.29e-08	1.06e-06		BGIOSGA028755	-4.2381	-4.7721
BGIOSGA009210	-1.5616	2.24e-43	3.3778e-41		BGIOSGA014633	-2.7681	2.6e-09	9.93e-08		BGIOSGA028759	-2.8792	-4.0259
BGIOSGA009218	-1.3522	0.0001599	0.0018936		BGIOSGA014662	-2.7518	9.8e-05	0.001654		BGIOSGA028777	1.7502	-1.9728
BGIOSGA009227	-1.2272	2.2702e-07	4.5501e-06		BGIOSGA014710	-2.0857	5.28e-11	2.44e-09		BGIOSGA028779	-1.6193	-1.7271
BGIOSGA009230	-2.181	2.0058e-10	5.8651e-09		BGIOSGA014719	-2.1054	7.78e-07	2.03e-05		BGIOSGA028838	-4.2467	-4.1869
BGIOSGA009254	-1.6124	3.1269e-24	2.2459e-22		BGIOSGA014800	-2.5329	3.29e-18	2.74e-16		BGIOSGA028891	1.1321	1.3301
BGIOSGA009300	-1.3189	1.8587e-06	3.2425e-05		BGIOSGA014839	-1.8843	1.93e-06	4.67e-05		BGIOSGA028955	-1.3747	-2.1089
BGIOSGA009313	1.6822	1.437e-05	0.00021268		BGIOSGA014893	2.3907	2.03e-27	2.91e-25		BGIOSGA028958	1.6504	1.2698
BGIOSGA009326	-4.5058	2.039e-05	0.00029218		BGIOSGA014934	-2.9048	2.55e-13	1.47e-11		BGIOSGA029015	-2.7624	-3.7004
BGIOSGA009335	-1.1269	0.0003387	0.0036605		BGIOSGA014945	-2.4893	1.89e-27	2.72e-25		BGIOSGA029025	1.2585	1.3635
BGIOSGA009380	-2.8277	3.91e-13	1.48e-11		BGIOSGA014954	-1.8317	1.68e-06	4.08e-05		BGIOSGA029184	-2.1445	-3.12
BGIOSGA009388	2.1888	6.9745e-09	1.7184e-07		BGIOSGA014964	-1.213	0.00023278	0.0035622		BGIOSGA029234	-1.2394	-3.0259
BGIOSGA009399	-1.9067	0.00027975	0.0031086		BGIOSGA014966	-1.2821	2.06e-05	0.00040653		BGIOSGA029255	-3.1517	-3.5628
BGIOSGA009400	-2.1616	4.453e-07	8.5733e-06		BGIOSGA014990	-1.3378	2.51e-05	0.00048587		BGIOSGA029256	-2.4751	-2.7942
BGIOSGA009455	-2.4879	3.7854e-35	4.4501e-33		BGIOSGA015014	-3.8525	1.49e-08	5.06e-07		BGIOSGA029283	-1.3155	-1.569
BGIOSGA009480	-1.137	1.3901e-10	4.1362e-09		BGIOSGA015065	1.0974	4.64e-11	2.16e-09		BGIOSGA029341	3.1869	3.31
BGIOSGA009502	-1.2097	2.2694e-11	7.3441e-10		BGIOSGA015125	1.1828	1.95e-17	1.55e-15		BGIOSGA029354	3.7875	6.8776
BGIOSGA009515	-3.8484	9.897e-15	4.2418e-13		BGIOSGA015140	1.3784	1.03e-07	3.1e-06		BGIOSGA029374	1.2014	1.0662
BGIOSGA009539	-1.8672	5.9785e-32	6.1718e-30		BGIOSGA015157	1.0333	4.63e-05	0.00084883		BGIOSGA029415	-2.211	-2.4157
BGIOSGA009543	-1.8478	4.4233e-13	1.6567e-11		BGIOSGA015291	2.5062	5.38e-43	1.44e-40		BGIOSGA029416	-5.0236	-3.5556
BGIOSGA009547	2.1129	5.0243e-24	3.5555e-22		BGIOSGA015483	1.7458	3.15e-08	1.02e-06		BGIOSGA029417	-6.1698	-4.0826
BGIOSGA009551	-2.453	4.68e-27	3.7443e-25		BGIOSGA015491	3.8498	1.31e-08	4.49e-07		BGIOSGA029453	1.2626	-2.2568
BGIOSGA009555	-1.2777	0.00017845	0.0020893		BGIOSGA015511	-1.9806	0.00012188	0.0020113		BGIOSGA029506	1.0669	1.6661
BGIOSGA009564	-2.5857	1.1784e-13	4.6621e-12		BGIOSGA015521	-1.9362	4.05e-07	1.11e-05		BGIOSGA029581	-1.6925	-1.7321
BGIOSGA009565	-3.8472	8.3736e-08	1.7865e-06		BGIOSGA015546	1.9902	1.72e-05	0.00034544		BGIOSGA029609	-2.3116	-1.785
BGIOSGA009607	-1.5405	1.1768e-05	0.0001769		BGIOSGA015677	-4.606	1.1e-07	3.3e-06		BGIOSGA029629	1.4669	2.3023
BGIOSGA009631	5.7878	1.3063e-10	3.9069e-09		BGIOSGA015687	-2.6153	6.8e-58	2.74e-55		BGIOSGA029652	-1.5764	-3.32
BGIOSGA009641	-2.9553	9.1363e-25	6.8349e-23		BGIOSGA015713	1.7042	1.5e-05	0.00030423		BGIOSGA029726	1.0595	1.6757
BGIOSGA009739	-2.5361	6.1534e-30	5.7356e-28		BGIOSGA015756	1.3284	1.96e-05	0.00038717		BGIOSGA029756	1.9634	1.2636
BGIOSGA009741	-1.38	8.7582e-10	2.3933e-08		BGIOSGA015825	-1.3435	1.96e-06	4.73e-05		BGIOSGA029771	1.9154	1.7945
BGIOSGA009755	-3.0402	8.1862e-115	6.9347e-112		BGIOSGA015843	1.879	2.92e-09	1.11e-07		BGIOSGA029799	1.2796	1.4709
BGIOSGA009765	-1.5895	2.5766e-08	5.9704e-07		BGIOSGA015855	-4.4451	8.86e-08	2.7e-06		BGIOSGA029804	1.5296	1.4103
BGIOSGA009766	-2.55	1.0657e-69	3.4489e-67		BGIOSGA015928	1.1435	2.46e-12	1.31e-10		BGIOSGA029810	-2.4125	-2.4945
BGIOSGA009773	-2.8647	5.0718e-88	2.4346e-85		BGIOSGA015955	-1.3287	0.0001639	0.0026202		BGIOSGA029832	-2.9552	-3.4969
BGIOSGA009781	-1.7748	0.00030399	0.0033342		BGIOSGA015960	-3.3258	6.33e-27	8.85e-25		BGIOSGA029852	-1.3331	-1.5519
BGIOSGA009826	-2.5109	2.818e-19	1.5669e-17		BGIOSGA015961	-3.0939	1.45e-24	1.83e-22		BGIOSGA029860	1.0687	1.173
BGIOSGA009843	-1.4724	1.1157e-05	0.00016897		BGIOSGA016012	-1.1643	1.26e-12	6.98e-11		BGIOSGA029896	-1.4703	-1.2349
BGIOSGA009845	-2.152	0.00028881	0.0031919		BGIOSGA016027	1.329	8.96e-07	2.3e-05		BGIOSGA029951	-5.2379	-3.4189
BGIOSGA009848	-1.4633	9.4822e-08	2.0081e-06		BGIOSGA016105	2.7585	2.45e-08	8.03e-07		BGIOSGA030195	-1.3996	-1.0898
BGIOSGA009858	-3.4701	2.5565e-14	1.0569e-12		BGIOSGA016111	-1.384	9.38e-14	5.65e-12		BGIOSGA030237	1.1312	3.0972
BGIOSGA009874	-3.3101	4.5547e-05	0.00061158		BGIOSGA016129	2.373	5.84e-09	2.11e-07		BGIOSGA030245	-1.5208	-1.2301
BGIOSGA009886	-3.5603	2.5432e-17	1.2896e-15		BGIOSGA016156	5.3981	7.41e-07	1.94e-05		BGIOSGA030292	5.3145	5.8923
BGIOSGA009894	-3.7149	3.7144e-19	2.0573e-17		BGIOSGA016214	-1.3484	4.45e-11	2.08e-09		BGIOSGA030307	-2.3873	-3.3253
BGIOSGA009901	1.4308	1.0245e-07	2.1461e-06		BGIOSGA016230	1.2283	1.47e-05	0.00030101		BGIOSGA030409	4.5464	3.753
BGIOSGA009929	-3.1851	5.1667e-13	1.9177e-11		BGIOSGA016262	1.4982	5.61e-08	1.76e-06		BGIOSGA030626	-3.6161	-3.7442
BGIOSGA009939	-1.8257	2.0465e-12	7.304e-11		BGIOSGA016275	1.1131	1.22e-06	3.06e-05		BGIOSGA030660	-1.5205	-2.4263
BGIOSGA009948	-1.8035	4.7688e-13	1.7769e-11		BGIOSGA016280	1.1167	2.96e-07	8.26e-06		BGIOSGA030739	-1.7591	-2.5487
BGIOSGA009963	-1.8516	2.391e-10	6.963e-09		BGIOSGA016287	-1.1152	1.44e-05	0.00029435		BGIOSGA030791	-2.2055	-2.7317
BGIOSGA009965	-1.1334	4.4289e-11	1.3941e-09		BGIOSGA016358	-2.8633	1.77e-12	9.62e-11		BGIOSGA030907	-7.5872	-6.7716
BGIOSGA009967	1.3166	9.0272e-05	0.0011319		BGIOSGA016393	4.5789	1.54e-07	4.48e-06		BGIOSGA030985	-1.733	-1.8671
BGIOSGA009984	-3.2857	0.00044327	0.0046527		BGIOSGA016419	-1.5917	2.18e-07	6.19e-06		BGIOSGA030989	-1.9465	-3.7237
BGIOSGA009988	-1.1975	6.9926e-07	1.3027e-05		BGIOSGA016430	1.8678	2.07e-08	6.87e-07		BGIOSGA031004	-1.8805	-2.2394
BGIOSGA010013	1.8622	0.0001188	0.0014511		BGIOSGA016491	-3.5896	2.02e-55	7.84e-53		BGIOSGA031005	-1.2349	-2.0595
BGIOSGA010092	-1.9434	0.00019074	0.0022178		BGIOSGA016515	-3.3267	0.00010714	0.001798		BGIOSGA031075	-4.7366	-3.8628
BGIOSGA010094	-4.5506	5.9817e-06	9.5768e-05		BGIOSGA016526	5.2029	1.58e-05	0.00031917		BGIOSGA031076	-3.5954	-3.1186
BGIOSGA010095	-5.948	1.97e-07	3.97e-06		BGIOSGA016528	1.6434	3.55e-07	9.74e-06		BGIOSGA031183	-3.1059	-3.3105
BGIOSGA010105	2.5943	2.2067e-05	0.00031386		BGIOSGA016624	-1.3574	9.64e-09	3.37e-07		BGIOSGA031338	2.2886	1.6159
BGIOSGA010114	-2.0914	7.6891e-11	2.3435e-09		BGIOSGA016636	1.0171	3.41e-102	3.9e-99		BGIOSGA031347	-1.1765	-1.2153
BGIOSGA010128	-1.1964	0.00045195	0.0047334		BGIOSGA016651	-1.6873	3.17e-10	1.36e-08		BGIOSGA031390	-2.5057	-2.8548
BGIOSGA010142	1.0798	2.8362e-06	4.7939e-05		BGIOSGA016718	1.3068	9.09e-10	3.67e-08		BGIOSGA031427	4.1273	4.1436
BGIOSGA010171	-2.4489	5.5376e-08	1.2166e-06		BGIOSGA016724	-1.6163	4.34e-05	0.00079876		BGIOSGA031474	2.8592	3.1859
BGIOSGA010175	-1.5769	2.4294e-06	4.1501e-05		BGIOSGA016731	-4.0912	2.18e-08	7.24e-07		BGIOSGA031561	1.1649	1.7625
BGIOSGA010182	1.2385	1.0293e-16	5.042e-15		BGIOSGA016734	-1.7513	2.17e-05	0.00042505		BGIOSGA031572	-1.4116	-3.1104
BGIOSGA010188	1.7888	0.00017017	0.0020005		BGIOSGA016736	1.1482	5.5e-07	1.47e-05		BGIOSGA031606	-1.1847	-2.2494
BGIOSGA010303	-1.6901	2.605e-11	8.3643e-10		BGIOSGA016770	-2.2509	6.1e-06	0.00013355		BGIOSGA031671	-2.2584	-3.6957
BGIOSGA010365	-2.0291	1.0818e-11	3.6103e-10		BGIOSGA016784	1.2041	0.00020314	0.003153		BGIOSGA031688	-1.725	-1.9466
BGIOSGA010384	-4.0443	1.7978e-05	0.00026072		BGIOSGA016861	-1.3674	1.68e-09	6.54e-08		BGIOSGA031737	-4.0837	-5.5071
BGIOSGA010466	-1.3414	1.3429e-07	2.7726e-06		BGIOSGA016863	-1.171	1.77e-09	6.86e-08		BGIOSGA031783	-4.6451	-3.93
BGIOSGA010468	-2.8866	5.6472e-13	2.0906e-11		BGIOSGA016898	-2.7717	8.35e-08	2.55e-06		BGIOSGA031784	-3.0257	-3.0668
BGIOSGA010483	-4.2729	1.6765e-20	1.0018e-18		BGIOSGA016903	-2.415	1.49e-08	5.06e-07		BGIOSGA031785	-4.5491	-3.2203
BGIOSGA010543	1.2871	0.00018904	0.0022017		BGIOSGA016946	-1.9526	9.04e-07	2.32e-05		BGIOSGA031786	-3.2076	-3.9924
BGIOSGA010550	1.8718	5.278e-05	0.00069701		BGIOSGA016947	-3.7539	7.79e-26	1.01e-23		BGIOSGA031787	-5.8929	-4.8973
BGIOSGA010552	-3.734	1.6891e-38	2.2214e-36		BGIOSGA016950	-4.7294	1.96e-07	5.63e-06		BGIOSGA031788	-2.8196	-4.474
BGIOSGA010559	-2.3283	7.4453e-91	3.9711e-88		BGIOSGA016969	-1.3715	8.24e-07	2.13e-05		BGIOSGA031790	1.5981	-2.9358
BGIOSGA010599	1.9385	1.989e-05	0.00028573		BGIOSGA016980	7.6063	0.00032047	0.0047128		BGIOSGA031793	-2.3146	-3.6606
BGIOSGA010611	-1.8375	5.9103e-05	0.00077165		BGIOSGA016994	-1.1419	1.95e-21	2.04e-19		BGIOSGA031806	11.526	9.2888
BGIOSGA010704	-2.9201	0.00034698	0.0037401		BGIOSGA016996	-2.4202	3.69e-09	1.37e-07		BGIOSGA031936	1.7604	1.3308
BGIOSGA010716	-4.4376	1.1925e-14	5.0731e-13		BGIOSGA016998	-3.5882	9.57e-14	5.75e-12		BGIOSGA031944	2.8908	-3.2261
BGIOSGA010761	-1.8295	1.2578e-28	1.1045e-26		BGIOSGA017009	-1.9156	4.76e-06	0.00010645		BGIOSGA031997	-1.3921	-2.073
BGIOSGA010778	1.6179	3.1086e-05	0.00043045		BGIOSGA017057	3.5418	7.54e-08	2.31e-06		BGIOSGA032002	-3.4843	-3.0054
BGIOSGA010806	-1.8801	1.476e-30	1.4171e-28		BGIOSGA017060	1.7658	5.71e-06	0.00012599		BGIOSGA032288	-1.5566	-1.7594
BGIOSGA010816	-1.3905	0.00012323	0.0015001		BGIOSGA017088	-2.6928	3.16e-63	1.44e-60		BGIOSGA032395	-4.0609	-2.8926
BGIOSGA010822	-2.0397	4.8168e-13	1.7924e-11		BGIOSGA017219	-1.3831	1.14e-20	1.11e-18		BGIOSGA032462	-1.044	-2.0217
BGIOSGA010837	-2.1062	0.00020765	0.0023875		BGIOSGA017251	1.6199	1.88e-07	5.41e-06		BGIOSGA032529	-1.3813	-1.2504
BGIOSGA010845	-1.7859	8.1574e-08	1.7429e-06		BGIOSGA017254	1.414	3.54e-10	1.52e-08		BGIOSGA032733	1.0792	1.3747
BGIOSGA010857	-2.9697	1.0897e-31	1.0974e-29		BGIOSGA017260	1.0052	1.3e-14	8.45e-13		BGIOSGA032792	1.0934	1.5261
BGIOSGA010865	-2.3598	3.4472e-06	5.7558e-05		BGIOSGA017279	1.3752	5.2e-17	3.98e-15		BGIOSGA032814	6.0601	2.6884
BGIOSGA010891	-1.8606	2.9821e-05	0.00041394		BGIOSGA017285	3.379	1.43e-07	4.2e-06		BGIOSGA033067	-1.9566	-1.8134
BGIOSGA010921	-3.5821	6.5862e-22	4.2628e-20		BGIOSGA017321	-3.5059	1.3e-59	5.42e-57		BGIOSGA033070	-1.6795	-2.523
BGIOSGA010945	-4.0864	0	0		BGIOSGA017326	-3.1642	1.01e-05	0.00021215		BGIOSGA033142	1.2749	1.2
BGIOSGA010948	-2.0934	0.00028458	0.0031501		BGIOSGA017327	-1.6513	8.77e-05	0.0014978		BGIOSGA033144	1.2392	1.2345
BGIOSGA010959	-2.2596	4.0401e-22	2.6567e-20		BGIOSGA017361	1.4642	2.85e-05	0.00054585		BGIOSGA033178	-1.7799	-1.8811
BGIOSGA010981	-1.395	1.233e-14	5.2381e-13		BGIOSGA017365	3.5229	2.78e-15	1.88e-13		BGIOSGA033209	-2.9431	-3.4111
BGIOSGA010984	-2.8326	5.667e-06	9.1184e-05		BGIOSGA017385	-3.5291	6.14e-52	2.17e-49		BGIOSGA033216	-2.335	-2.268
BGIOSGA010995	-1.4554	1.6698e-23	1.1645e-21		BGIOSGA017389	-3.1771	2.6e-05	0.00050109		BGIOSGA033296	-3.0221	-2.292
BGIOSGA011015	-3.7891	2.0033e-15	9.0295e-14		BGIOSGA017399	1.4166	0.00029918	0.0044361		BGIOSGA033300	1.2188	1.1119
BGIOSGA011032	-2.3214	3.2931e-06	5.5112e-05		BGIOSGA017462	-1.7017	7.21e-12	3.62e-10		BGIOSGA033329	1.3946	-1.8544
BGIOSGA011051	-1.6267	2.2528e-08	5.2667e-07		BGIOSGA017468	1.0464	2.47e-05	0.0004786		BGIOSGA033384	-1.8115	-1.6375
BGIOSGA011056	-1.4442	1.8999e-05	0.00027401		BGIOSGA017483	1.0471	0.00024758	0.0037605		BGIOSGA033387	1.4109	-1.6347
BGIOSGA011066	-2.2141	1.0333e-33	1.1626e-31		BGIOSGA017490	1.9088	7.03e-09	2.52e-07		BGIOSGA033397	6.7887	6.7678
BGIOSGA011068	1.1643	0.00013028	0.00158		BGIOSGA017494	5.0887	1.34e-26	1.81e-24		BGIOSGA033406	-5.6159	-2.0849
BGIOSGA011082	-4.0305	5.3912e-08	1.1862e-06		BGIOSGA017604	-3.2813	6.13e-15	4.06e-13		BGIOSGA033425	-1.9422	-2.4756
BGIOSGA011087	-1.3069	2.1272e-08	4.9974e-07		BGIOSGA017630	-2.888	6.37e-14	3.87e-12		BGIOSGA033476	3.0468	2.6897
BGIOSGA011133	1.4708	3.8041e-06	6.286e-05		BGIOSGA017631	-2.8959	3.68e-06	8.38e-05		BGIOSGA033527	3.8967	4.168
BGIOSGA011134	-1.3377	1.719e-05	0.00024992		BGIOSGA017646	-2.1085	1.29e-09	5.11e-08		BGIOSGA033532	-3.4892	-1.84
BGIOSGA011135	-4.059	0	0		BGIOSGA017703	2.3261	2.46e-09	9.4e-08		BGIOSGA033582	-1.115	-3.2132
BGIOSGA011140	-4.6646	4.8953e-13	1.8193e-11		BGIOSGA017709	-1.8862	2.31e-17	1.82e-15		BGIOSGA033659	-2.5865	-2.2302
BGIOSGA011151	1.4998	0.00019111	0.0022213		BGIOSGA017720	3.8784	2.23e-05	0.00043666		BGIOSGA033688	3.0654	3.21
BGIOSGA011180	1.2732	4.5303e-07	8.7103e-06		BGIOSGA017727	4.4342	1.58e-05	0.00031949		BGIOSGA033689	2.4369	3.097
BGIOSGA011196	-2.8424	1.7663e-27	1.4371e-25		BGIOSGA017731	1.4867	2.69e-06	6.34e-05		BGIOSGA033715	-2.1756	-2.0476
BGIOSGA011208	-1.9447	6.9258e-05	0.00089053		BGIOSGA017738	3.8577	5.49e-05	0.00099096		BGIOSGA033774	-3.1233	-3.0813
BGIOSGA011237	1.7808	1.0115e-09	2.7356e-08		BGIOSGA017796	-1.6919	1.51e-33	2.97e-31		BGIOSGA034012	1.5704	-2.9226
BGIOSGA011246	1.0047	1.956e-06	3.3918e-05		BGIOSGA017812	-1.3187	0.00024299	0.0037006		BGIOSGA034207	2.1911	2.6826
BGIOSGA011282	-3.0283	9.8221e-08	2.071e-06		BGIOSGA017823	1.9975	4e-05	0.00074258		BGIOSGA034249	1.0771	1.6612
BGIOSGA011298	-2.1148	1.7301e-08	4.0979e-07		BGIOSGA017834	-1.3073	1.17e-18	1.01e-16		BGIOSGA034294	-1.9947	-3.3432
BGIOSGA011305	-4.2668	9.0336e-19	4.8724e-17		BGIOSGA017864	1.2749	0.00028972	0.0043115		BGIOSGA034297	3.9927	3.1489
BGIOSGA011309	-2.7011	1.5189e-05	0.00022274		BGIOSGA017875	-1.3049	1.44e-06	3.56e-05		BGIOSGA034298	4.8628	3.5583
BGIOSGA011317	2.0001	2.4743e-09	6.4087e-08		BGIOSGA017876	3.5229	1.18e-09	4.69e-08		BGIOSGA034312	4.124	1.7127
BGIOSGA011324	-1.7806	1.506e-20	9.0744e-19		BGIOSGA017949	-2.0008	8.11e-14	4.92e-12		BGIOSGA034313	-3.3656	-3.4759
BGIOSGA011326	1.2214	1.0337e-24	7.693e-23		BGIOSGA017959	1.5456	3.5e-30	5.79e-28		BGIOSGA034327	-3.3738	-4.2568
BGIOSGA011332	-3.6527	7.5155e-28	6.3108e-26		BGIOSGA017962	-2.5572	1.11e-07	3.31e-06		BGIOSGA034486	-3.8047	-3.2401
BGIOSGA011354	1.2076	2.47e-12	8.7827e-11		BGIOSGA017978	1.5014	3.86e-09	1.43e-07		BGIOSGA034654	1.0794	1.456
BGIOSGA011368	-1.1932	7.9547e-08	1.7022e-06		BGIOSGA018017	-1.3038	1.53e-10	6.82e-09		BGIOSGA034712	2.1806	1.6292
BGIOSGA011389	1.1283	1.0463e-11	3.5e-10		BGIOSGA018056	-1.0856	8.21e-05	0.0014107		BGIOSGA034730	3.2553	2.6282
BGIOSGA011433	-3.2963	3.2416e-81	1.373e-78		BGIOSGA018078	1.8361	1.01e-32	1.91e-30		BGIOSGA034784	-1.7499	-2.0816
BGIOSGA011440	-1.2718	3.5241e-06	5.8602e-05		BGIOSGA018120	-1.415	0.00016047	0.0025796		BGIOSGA034792	1.1221	1.3237
BGIOSGA011441	-1.9687	0.00031516	0.0034357		BGIOSGA018130	1.0381	2.29e-24	2.84e-22		BGIOSGA034863	-1.2493	-2.597
BGIOSGA011458	1.3436	3.5852e-136	3.6879e-133		BGIOSGA018154	-2.7982	4.13e-09	1.52e-07		BGIOSGA035038	-1.509	-2.6207
BGIOSGA011485	-1.4527	8.661e-06	0.00013455		BGIOSGA018214	2.0347	5.92e-05	0.0010562		BGIOSGA035192	-7.9108	-2.8514
BGIOSGA011504	1.309	8.7605e-07	1.6174e-05		BGIOSGA018236	1.6181	1.97e-12	1.07e-10		BGIOSGA035193	-7.8413	-3.2716
BGIOSGA011507	1.3924	4.5425e-11	1.4283e-09		BGIOSGA018301	1.5013	1.94e-38	4.7e-36		BGIOSGA035267	-1.5878	-1.5448
BGIOSGA011531	-2.5902	1.7426e-11	5.697e-10		BGIOSGA018391	1.0215	0.00010035	0.001691		BGIOSGA035695	-5.0618	-4.0449
BGIOSGA011536	-1.0351	5.5801e-08	1.225e-06		BGIOSGA018405	-1.3466	2.58e-07	7.27e-06		BGIOSGA035805	2.1897	1.347
BGIOSGA011542	-3.999	1.1174e-163	1.6091e-160		BGIOSGA018546	1.6923	4.01e-35	8.39e-33		BGIOSGA035815	1.4894	1.449
BGIOSGA011548	-2.3605	6.8804e-15	2.98e-13		BGIOSGA018652	-1.6309	4.17e-05	0.00076995		BGIOSGA035818	2.5374	2.4684
BGIOSGA011562	1.0888	0.00030235	0.0033199		BGIOSGA018714	1.4478	2.74e-66	1.35e-63		BGIOSGA035845	2.1367	1.9535
BGIOSGA011567	1.075	3.754e-10	1.0748e-08		BGIOSGA018766	-2.321	7.8e-37	1.72e-34		BGIOSGA035933	-1.69	-2.6512
BGIOSGA011578	1.0895	9.4057e-05	0.0011735		BGIOSGA018787	1.4429	0.00010087	0.0016988		BGIOSGA036047	-1.0481	-1.9318
BGIOSGA011580	-2.6136	1.8e-10	5.2901e-09		BGIOSGA018799	-2.5582	1.74e-05	0.00034795		BGIOSGA036115	-4.6686	-3.7818
BGIOSGA011592	-1.3781	5.0806e-08	1.1256e-06		BGIOSGA018863	-4.25	4.48e-07	1.22e-05		BGIOSGA036143	-1.1914	5.836
BGIOSGA011605	-1.6762	3.4341e-28	2.935e-26		BGIOSGA018883	1.9571	5.67e-08	1.77e-06		BGIOSGA036214	3.3199	3.4091
BGIOSGA011657	4.3571	7.0124e-78	2.7667e-75		BGIOSGA018891	-2.9207	3.22e-17	2.51e-15		BGIOSGA036403	-1.6571	-1.9192
BGIOSGA011660	1.5737	6.9961e-141	8.3959e-138		BGIOSGA018911	1.3691	3.34e-49	1.04e-46		BGIOSGA036440	-1.231	-1.6096
BGIOSGA011661	2.0044	3.6192e-76	1.3538e-73		BGIOSGA018921	-1.9085	3.54e-06	8.11e-05		BGIOSGA036477	2.9959	-2.8254
BGIOSGA011664	4.8356	1.0858e-89	5.4868e-87		BGIOSGA018922	-2.5863	2.86e-06	6.68e-05		BGIOSGA036516	-3.0423	-2.9115
BGIOSGA011677	-2.6806	1.151e-19	6.5515e-18		BGIOSGA018938	2.544	3.66e-37	8.32e-35		BGIOSGA036593	-1.4147	-2.1087
BGIOSGA011687	1.0517	7.5041e-11	2.292e-09		BGIOSGA019006	-3.8488	7.09e-05	0.0012369		BGIOSGA036628	-3.6898	-3.1678
BGIOSGA011714	-1.1707	6.0214e-10	1.6854e-08		BGIOSGA019016	-3.6354	0.00015463	0.0024914		BGIOSGA036641	2.3069	1.4253
BGIOSGA011715	-1.0977	2.1987e-11	7.1353e-10		BGIOSGA019027	1.5276	1.41e-17	1.13e-15		BGIOSGA036858	1.6746	1.7522
BGIOSGA011747	-1.7082	1.2655e-06	2.2724e-05		BGIOSGA019032	-1.9744	1.01e-07	3.03e-06		BGIOSGA036874	2.475	1.4177
BGIOSGA011750	-1.848	4.7403e-07	9.0778e-06		BGIOSGA019039	1.4479	5.84e-27	8.2e-25		BGIOSGA036880	3.1246	5.0677
BGIOSGA011751	-1.5822	5.5299e-19	3.0108e-17		BGIOSGA019054	-3.6436	0	0		BGIOSGA037101	-2.9279	-3.6422
BGIOSGA011774	1.422	1.9968e-05	0.0002867		BGIOSGA019067	1.0672	9.71e-07	2.47e-05		BGIOSGA037181	1.8873	-1.9184
BGIOSGA011778	-1.1321	3.1443e-05	0.00043498		BGIOSGA019108	-2.1922	1.32e-23	1.58e-21		BGIOSGA037304	2.2263	1.0799
BGIOSGA011782	3.2633	0.00030732	0.0033642		BGIOSGA019112	-2.7427	2.09e-131	4.28e-128		BGIOSGA037385	-4.4282	-4.0156
BGIOSGA011785	-3.5206	2.97e-05	0.00041293		BGIOSGA019131	1.4045	3.73e-14	2.34e-12		BGIOSGA037524	1.1755	1.3523
BGIOSGA011826	-1.6693	1.1077e-09	2.9762e-08		BGIOSGA019133	-1.8897	5.39e-06	0.00011928		BGIOSGA037569	1.8775	3.6921
BGIOSGA011829	-2.0474	5.982e-12	2.056e-10		BGIOSGA019146	2.0372	4.04e-08	1.29e-06		BGIOSGA037620	1.4117	2.0825
BGIOSGA011831	3.0953	0.00047518	0.0049391		BGIOSGA019160	1.5763	2.55e-05	0.00049271		BGIOSGA037633	-2.2194	-2.5988
BGIOSGA011834	-4.3856	7.0202e-14	2.8225e-12		BGIOSGA019235	1.2841	1.39e-05	0.00028508		BGIOSGA037638	1.7121	2.2163
BGIOSGA011838	1.1372	7.409e-08	1.5901e-06		BGIOSGA019276	-1.9839	4.44e-09	1.62e-07		BGIOSGA037853	-2.6187	-3.1936
BGIOSGA011856	-2.282	2.1524e-05	0.00030674		BGIOSGA019277	-3.5338	1.43e-05	0.00029251		BGIOSGA037907	-1.5017	-2.8122
BGIOSGA011866	1.1777	0.00035423	0.0038097		BGIOSGA019291	-2.427	2.91e-15	1.96e-13		BGIOSGA037984	1.9004	3.036
BGIOSGA011873	-2.245	4.6647e-09	1.1713e-07		BGIOSGA019292	-3.3204	5.9e-11	2.72e-09		BGIOSGA038054	3.5654	4.9614
BGIOSGA011886	-2.2233	1.3872e-07	2.8579e-06		BGIOSGA019365	1.7738	2.4e-05	0.00046446		BGIOSGA038159	1.344	2.2128
BGIOSGA011890	-5.4835	1.0898e-05	0.00016563		BGIOSGA019479	7.931	7.28e-05	0.0012627		BGIOSGA038333	-2.9657	-3.6679
BGIOSGA011900	-3.518	3.4976e-08	7.9635e-07		BGIOSGA019578	1.0488	7.19e-08	2.21e-06		BGIOSGA040489	-2.1516	-2.6493
BGIOSGA011908	-1.282	1.6702e-08	3.9658e-07		BGIOSGA019586	-1.1106	0.00032023	0.0047117		BGIOSGA040512	1.1359	1.756
BGIOSGA011915	-1.5004	2.001e-10	5.8571e-09		BGIOSGA019596	1.7259	5.43e-08	1.7e-06		BGIOSGA040600	2.7326	1.3814
BGIOSGA011916	-3.2621	2.724e-12	9.6383e-11		BGIOSGA019621	3.2115	3e-06	6.98e-05		BGIOSGA040604	-2.7853	-3.5823
BGIOSGA011919	1.2789	1.6075e-05	0.00023538		BGIOSGA019646	2.9394	1.79e-49	5.69e-47		BGIOSGA040642	-3.961	-3.6474
BGIOSGA011953	-1.3738	7.6457e-21	4.6556e-19		BGIOSGA019694	5.431	1.24e-06	3.09e-05		Novel00488	-1.115	-1.0263
BGIOSGA011969	-1.634	3.3028e-05	0.00045537		BGIOSGA019700	-2.6766	4.32e-09	1.59e-07		Novel00606	1.6327	1.0999
BGIOSGA011983	-3.3138	1.1445e-79	4.709e-77		BGIOSGA019701	1.2472	0.00019321	0.003019		Novel00614	2.3987	2.7892
BGIOSGA011988	-2.2498	3.6535e-11	1.1551e-09		BGIOSGA019782	1.7308	0.00030584	0.0045201		Novel00652	-1.7266	-1.3341
BGIOSGA012007	3.6515	4.9051e-39	6.5104e-37		BGIOSGA019833	5.0166	2.39e-05	0.00046351		Novel00756	-4.4442	-3.5939
BGIOSGA012010	-1.9656	3.4801e-09	8.9096e-08		BGIOSGA019903	-1.0315	1.86e-05	0.00037007		Novel01523	1.8695	2.0454
BGIOSGA012011	-2.337	7.3166e-19	3.9537e-17		BGIOSGA019909	-1.9092	4.97e-05	0.00090495		Novel01608	-3.5952	-4.0654
BGIOSGA012012	-1.7759	4.8228e-05	0.00064427		BGIOSGA019928	4.6798	1.28e-06	3.19e-05		Novel01728	-1.1063	-6.3261
BGIOSGA012018	-3.5476	1.2371e-42	1.8366e-40		BGIOSGA019942	-3.7641	6.36e-19	5.6e-17		Novel01773	-1.5019	-1.1917
BGIOSGA012040	-3.9943	1.0788e-19	6.1526e-18		BGIOSGA020021	5.3158	4.62e-11	2.15e-09
BGIOSGA012041	-2.0802	1.3444e-50	2.5644e-48		BGIOSGA020030	-2.2497	0.00025828	0.0038983
BGIOSGA012045	2.8168	0.00030378	0.0033331		BGIOSGA020031	-2.6217	6.59e-06	0.00014332
BGIOSGA012062	2.6014	1.1164e-05	0.00016897		BGIOSGA020048	-3.0761	1.42e-37	3.31e-35
BGIOSGA012069	-2.241	1.1918e-23	8.3515e-22		BGIOSGA020105	-1.3922	5.39e-07	1.44e-05
BGIOSGA012080	-3.6283	4.5612e-39	6.0821e-37		BGIOSGA020106	-2.6212	4.22e-16	3.04e-14
BGIOSGA012131	1.872	8.3996e-06	0.00013091		BGIOSGA020114	2.005	0.00021145	0.0032635
BGIOSGA012149	-2.5523	6.82e-19	3.7e-17		BGIOSGA020118	-1.3406	9.56e-09	3.36e-07
BGIOSGA012151	-2.8516	4.4677e-15	1.9676e-13		BGIOSGA020147	-1.0219	3.07e-16	2.22e-14
BGIOSGA012169	-1.7996	1.0919e-05	0.00016587		BGIOSGA020149	1.1638	6.22e-08	1.93e-06
BGIOSGA012172	-2.9844	5.4362e-18	2.8313e-16		BGIOSGA020160	-2.1536	1.55e-05	0.00031327
BGIOSGA012175	-2.2664	1.7314e-09	4.575e-08		BGIOSGA020188	1.8391	0.00025617	0.0038685
BGIOSGA012181	-2.9711	2.3383e-11	7.5585e-10		BGIOSGA020194	-1.6818	3.26e-06	7.53e-05
BGIOSGA012193	-2.7052	3.8067e-96	2.2376e-93		BGIOSGA020217	-3.0993	3.11e-29	4.85e-27
BGIOSGA012201	-1.5841	1.6725e-28	1.4509e-26		BGIOSGA020220	1.7529	0.0001611	0.0025855
BGIOSGA012209	-2.6338	7.2787e-93	3.9555e-90		BGIOSGA020243	-3.0563	3.51e-24	4.31e-22
BGIOSGA012215	1.5268	1.6787e-06	2.9499e-05		BGIOSGA020317	-2.0732	3.64e-58	1.49e-55
BGIOSGA012220	2.2579	1.5e-06	2.66e-05		BGIOSGA020318	4.6118	0.00033881	0.0049419
BGIOSGA012235	-2.935	1.0093e-50	1.938e-48		BGIOSGA020341	-1.1822	2.57e-08	8.38e-07
BGIOSGA012256	-2.2739	1.2637e-28	1.1063e-26		BGIOSGA020353	-8.9813	2.08e-32	3.88e-30
BGIOSGA012259	3.9601	1.1717e-58	2.7438e-56		BGIOSGA020360	-1.8725	3.33e-08	1.07e-06
BGIOSGA012275	-1.1343	2.7587e-05	0.00038515		BGIOSGA020497	-1.0639	4.81e-05	0.00087771
BGIOSGA012278	-2.2339	2.431e-11	7.832e-10		BGIOSGA020525	-1.6279	8.9e-15	5.86e-13
BGIOSGA012299	-1.9286	1.1887e-14	5.0645e-13		BGIOSGA020539	1.525	1.17e-06	2.95e-05
BGIOSGA012306	-2.0359	4.2589e-08	9.5757e-07		BGIOSGA020552	2.931	7.34e-10	3e-08
BGIOSGA012309	2.1534	3.1824e-31	3.1498e-29		BGIOSGA020577	1.4078	1.7e-11	8.38e-10
BGIOSGA012326	-1.6699	3.414e-17	1.7221e-15		BGIOSGA020606	1.1925	6.64e-10	2.73e-08
BGIOSGA012333	-2.6604	0	0		BGIOSGA020616	-2.4181	5.71e-06	0.00012599
BGIOSGA012338	-1.3375	7.7428e-09	1.9028e-07		BGIOSGA020641	-1.77	8.44e-10	3.43e-08
BGIOSGA012357	-2.017	1.5986e-10	4.7127e-09		BGIOSGA020684	-1.9142	0.00030153	0.0044625
BGIOSGA012379	-1.2758	8.4521e-08	1.8019e-06		BGIOSGA020688	1.4012	4.8e-07	1.3e-05
BGIOSGA012380	-2.7339	9.3731e-19	5.046e-17		BGIOSGA020778	-3.4454	4.08e-41	1.05e-38
BGIOSGA012398	-2.2675	4.814e-21	2.9946e-19		BGIOSGA020819	-1.7681	1.78e-16	1.31e-14
BGIOSGA012433	-3.0334	1.5238e-19	8.5888e-18		BGIOSGA020825	1.7084	5.12e-11	2.37e-09
BGIOSGA012434	1.3606	8.6731e-16	4.0161e-14		BGIOSGA020881	2.1432	8.18e-06	0.00017509
BGIOSGA012436	1.6533	2.2108e-13	8.5701e-12		BGIOSGA020918	-3.955	9.05e-16	6.37e-14
BGIOSGA012438	-1.7049	1.2877e-10	3.8554e-09		BGIOSGA020972	2.6916	2.06e-07	5.88e-06
BGIOSGA012447	-2.6207	8.0518e-80	3.361e-77		BGIOSGA021047	-2.1263	9.86e-09	3.45e-07
BGIOSGA012450	-3.084	4.5182e-10	1.2884e-08		BGIOSGA021064	3.2055	3.17e-06	7.34e-05
BGIOSGA012464	-2.4353	6.2789e-28	5.3034e-26		BGIOSGA021067	-2.1073	7.54e-06	0.00016239
BGIOSGA012481	2.3099	0.00029935	0.0032908		BGIOSGA021074	1.3067	5.36e-05	0.00096798
BGIOSGA012485	-3.4151	6.2858e-42	9.237e-40		BGIOSGA021078	1.8969	4.72e-14	2.93e-12
BGIOSGA012498	-3.7877	3.4068e-05	0.00046681		BGIOSGA021108	-5.5076	7.65e-05	0.0013225
BGIOSGA012504	-4.6684	4.9856e-05	0.00066234		BGIOSGA021154	1.3347	1.94e-18	1.65e-16
BGIOSGA012507	-5.8014	3.596e-06	5.9592e-05		BGIOSGA021272	-1.572	2.92e-05	0.00055798
BGIOSGA012509	-4.5205	8.2423e-21	4.9978e-19		BGIOSGA021288	-3.1718	3.43e-07	9.47e-06
BGIOSGA012521	-2.5454	9.8667e-14	3.9306e-12		BGIOSGA021344	-1.408	2.29e-11	1.11e-09
BGIOSGA012568	-3.5645	1.1831e-32	1.2762e-30		BGIOSGA021377	1.9335	2.48e-07	6.99e-06
BGIOSGA012571	-3.5547	7.6754e-05	0.00097817		BGIOSGA021416	2.504	0.0001881	0.0029575
BGIOSGA012578	1.3492	1.3266e-09	3.5347e-08		BGIOSGA021426	-1.504	2.93e-08	9.53e-07
BGIOSGA012597	-4.4864	5.0868e-09	1.2696e-07		BGIOSGA021439	1.0497	1.43e-05	0.00029405
BGIOSGA012598	-2.4363	2.2631e-05	0.00032125		BGIOSGA021470	-6.5747	5.93e-10	2.46e-08
BGIOSGA012628	-1.0757	1.0953e-09	2.9484e-08		BGIOSGA021485	1.0397	1.88e-05	0.00037404
BGIOSGA012664	-5.8123	9.1337e-10	2.4865e-08		BGIOSGA021514	-1.8206	1.23e-23	1.48e-21
BGIOSGA012686	-3.7895	4.5408e-05	0.00061		BGIOSGA021518	-1.4691	9.45e-09	3.32e-07
BGIOSGA012703	-4.3332	0.00019542	0.0022669		BGIOSGA021541	-1.1651	1.99e-05	0.0003923
BGIOSGA012707	-2.0936	3.1258e-17	1.5794e-15		BGIOSGA021616	1.2556	5.05e-06	0.0001123
BGIOSGA012711	-2.2824	7.3797e-06	0.00011628		BGIOSGA021643	1.1698	0.00033363	0.0048788
BGIOSGA012779	-1.0334	3.6164e-12	1.2656e-10		BGIOSGA021662	3.4084	9.12e-05	0.0015526
BGIOSGA012815	1.4447	5.2674e-06	8.5135e-05		BGIOSGA021664	1.8575	3.33e-18	2.76e-16
BGIOSGA012836	2.145	3.1014e-67	9.4027e-65		BGIOSGA021665	2.1571	1.8e-08	6.02e-07
BGIOSGA012871	1.6086	0.00016211	0.0019143		BGIOSGA021674	1.261	7.8e-05	0.0013436
BGIOSGA012883	-1.3182	8.8615e-05	0.0011126		BGIOSGA021708	-2.5833	8.44e-22	9.02e-20
BGIOSGA012915	-1.1468	0.0001439	0.0017283		BGIOSGA021736	-1.2801	2.34e-07	6.62e-06
BGIOSGA012967	-3.3366	1.1163e-05	0.00016897		BGIOSGA021767	-2.9434	6.19e-05	0.0011003
BGIOSGA013019	-1.0315	0.00011325	0.0013903		BGIOSGA021769	2.9346	7.33e-11	3.36e-09
BGIOSGA013086	1.6689	7.5539e-10	2.076e-08		BGIOSGA021861	2.0721	2.58e-06	6.1e-05
BGIOSGA013093	1.3879	9.7254e-12	3.2685e-10		BGIOSGA021876	2.9233	3.83e-13	2.18e-11
BGIOSGA013211	1.3393	7.1341e-32	7.2606e-30		BGIOSGA021954	4.3936	4.66e-11	2.16e-09
BGIOSGA013214	-2.125	6.072e-05	0.00079027		BGIOSGA021955	4.8002	8.58e-08	2.61e-06
BGIOSGA013220	-4.6379	0.00040997	0.0043508		BGIOSGA021956	3.9819	6.69e-13	3.76e-11
BGIOSGA013241	-1.8044	0.00039931	0.004247		BGIOSGA021957	3.2003	4.33e-22	4.79e-20
BGIOSGA013249	2.6068	0.00018881	0.0021999		BGIOSGA021980	4.2921	7.75e-19	6.79e-17
BGIOSGA013300	-2.7828	7.1784e-14	2.8796e-12		BGIOSGA021999	1.4498	8.27e-50	2.66e-47
BGIOSGA013301	-1.4862	7.4633e-11	2.2823e-09		BGIOSGA022000	-4.5281	6.66e-16	4.71e-14
BGIOSGA013314	-2.185	3.3171e-07	6.5126e-06		BGIOSGA022007	-1.6467	1.21e-24	1.53e-22
BGIOSGA013325	-2.801	3.9507e-17	1.9878e-15		BGIOSGA022017	-3.8589	6.27e-11	2.89e-09
BGIOSGA013327	2.6811	3.5198e-06	5.8597e-05		BGIOSGA022078	1.4862	4.1e-31	7.21e-29
BGIOSGA013348	-1.604	9.933e-07	1.813e-05		BGIOSGA022083	-1.2755	2.21e-05	0.00043294
BGIOSGA013391	-1.6556	8.9722e-10	2.4448e-08		BGIOSGA022084	1.9079	1.23e-05	0.00025634
BGIOSGA013412	-1.5307	1.4639e-14	6.1822e-13		BGIOSGA022167	1.0054	2.29e-15	1.55e-13
BGIOSGA013426	-3.3552	2.3199e-14	9.628e-13		BGIOSGA022219	-6.1436	4.69e-36	1e-33
BGIOSGA013465	-3.9864	8.7402e-57	1.9071e-54		BGIOSGA022243	-3.1338	3.18e-28	4.71e-26
BGIOSGA013470	-1.1205	1.0953e-08	2.6494e-07		BGIOSGA022244	2.2042	7.48e-09	2.66e-07
BGIOSGA013482	-2.0594	1.3383e-12	4.8424e-11		BGIOSGA022246	1.216	3.09e-20	2.96e-18
BGIOSGA013486	-2.6808	1.467e-07	3.0181e-06		BGIOSGA022272	1.2898	1.43e-06	3.53e-05
BGIOSGA013493	-1.2461	0.00022896	0.0026035		BGIOSGA022375	-1.8621	2.8e-09	1.06e-07
BGIOSGA013520	-1.0913	0.00032384	0.0035157		BGIOSGA022384	-1.1763	4.65e-05	0.0008511
BGIOSGA013525	4.0453	1.8354e-87	8.6661e-85		BGIOSGA022398	-1.9361	1.1e-09	4.39e-08
BGIOSGA013533	-3.0681	1.2392e-138	1.4277e-135		BGIOSGA022460	-2.3089	2.35e-11	1.14e-09
BGIOSGA013566	-1.7803	9.8514e-09	2.3904e-07		BGIOSGA022468	-1.3462	4.68e-05	0.00085624
BGIOSGA013600	2.5211	7.2347e-06	0.00011424		BGIOSGA022483	2.0861	1.9e-05	0.0003761
BGIOSGA013604	-1.6158	0.00010259	0.0012698		BGIOSGA022502	-1.8117	5.16e-08	1.63e-06
BGIOSGA013607	1.0585	1.0745e-09	2.8951e-08		BGIOSGA022550	1.1115	1.28e-06	3.2e-05
BGIOSGA013612	-3.2409	2.9774e-09	7.6499e-08		BGIOSGA022551	-2.1228	1.31e-09	5.18e-08
BGIOSGA013620	-1.5945	3.4937e-08	7.9609e-07		BGIOSGA022607	-2.7347	5.73e-09	2.07e-07
BGIOSGA013642	1.1078	2.6371e-06	4.4784e-05		BGIOSGA022608	-1.8048	2.19e-08	7.26e-07
BGIOSGA013685	-1.5761	7.2488e-10	2.0056e-08		BGIOSGA022609	-3.3695	2.29e-06	5.48e-05
BGIOSGA013690	-3.1038	1.3201e-23	9.2283e-22		BGIOSGA022627	-3.1287	6.23e-19	5.51e-17
BGIOSGA013692	-1.775	2.633e-44	4.0554e-42		BGIOSGA022640	-1.345	3.33e-06	7.67e-05
BGIOSGA013697	-2.6452	1.535e-49	2.816e-47		BGIOSGA022643	1.243	3.14e-05	0.00059756
BGIOSGA013752	-2.4306	9.0479e-08	1.9218e-06		BGIOSGA022659	2.0253	2.87e-11	1.36e-09
BGIOSGA013814	-2.157	2.1836e-78	8.7352e-76		BGIOSGA022688	2.3481	3.1e-05	0.00059143
BGIOSGA013831	-4.7801	1.9484e-40	2.7111e-38		BGIOSGA022816	1.6335	4.88e-10	2.05e-08
BGIOSGA013832	-5.5894	2.7284e-35	3.2472e-33		BGIOSGA022968	1.4647	1.58e-06	3.87e-05
BGIOSGA013836	1.1521	1.6969e-21	1.0813e-19		BGIOSGA022996	1.0883	0.00013786	0.0022426
BGIOSGA013855	-3.1278	2.4009e-08	5.5902e-07		BGIOSGA023032	2.2935	1.86e-13	1.08e-11
BGIOSGA013861	2.2192	4.4869e-06	7.3261e-05		BGIOSGA023093	1.2262	1.04e-18	9.02e-17
BGIOSGA013883	1.3039	9.8382e-08	2.0729e-06		BGIOSGA023108	5.2254	0.00023437	0.0035808
BGIOSGA013985	2.8796	1.0144e-13	4.0354e-12		BGIOSGA023192	-2.4897	1.61e-08	5.41e-07
BGIOSGA013990	-1.8261	0.00032113	0.0034916		BGIOSGA023222	-1.42	2.31e-14	1.49e-12
BGIOSGA014054	1.2255	6.7393e-19	3.6623e-17		BGIOSGA023264	-1.3855	1.39e-103	1.66e-100
BGIOSGA014055	-2.9302	1.136e-25	8.7019e-24		BGIOSGA023318	-1.5519	2.36e-05	0.000458
BGIOSGA014059	-1.8596	4.3056e-37	5.439e-35		BGIOSGA023353	1.001	3.27e-09	1.23e-07
BGIOSGA014062	-1.8067	4.1401e-30	3.8841e-28		BGIOSGA023362	1.2375	4.81e-16	3.46e-14
BGIOSGA014090	-4.1822	9.5678e-10	2.5973e-08		BGIOSGA023363	-1.5141	2.58e-07	7.27e-06
BGIOSGA014106	1.5503	5.7715e-05	0.00075628		BGIOSGA023378	-1.1835	1.03e-08	3.61e-07
BGIOSGA014108	-2.5175	3.3901e-46	5.5796e-44		BGIOSGA023429	-1.414	0.00016617	0.002649
BGIOSGA014123	-2.3843	1.5267e-44	2.3898e-42		BGIOSGA023473	1.49	1.23e-43	3.39e-41
BGIOSGA014124	-1.4372	8.4792e-06	0.00013194		BGIOSGA023476	1.2716	6.1e-21	6.07e-19
BGIOSGA014134	-1.6302	1.1602e-11	3.863e-10		BGIOSGA023482	-3.5079	2.46e-82	2.01e-79
BGIOSGA014158	1.7995	2.3563e-05	0.00033284		BGIOSGA023530	1.6846	2.19e-28	3.26e-26
BGIOSGA014177	-1.4679	3.5383e-16	1.6734e-14		BGIOSGA023544	-1.3297	3.28e-07	9.09e-06
BGIOSGA014221	-1.0674	1.3548e-05	0.00020187		BGIOSGA023563	1.3495	0.00011734	0.0019487
BGIOSGA014234	-1.6741	5.4721e-05	0.00072033		BGIOSGA023607	1.3964	4.4e-06	9.89e-05
BGIOSGA014248	-2.3767	7.237e-05	0.0009264		BGIOSGA023617	-1.5284	3.52e-05	0.00066135
BGIOSGA014250	1.9943	2.5511e-23	1.7705e-21		BGIOSGA023624	1.7591	1.43e-15	9.86e-14
BGIOSGA014275	2.4421	1.6948e-05	0.00024654		BGIOSGA023626	3.5635	4.95e-06	0.00011034
BGIOSGA014316	1.2525	0.00026988	0.0030104		BGIOSGA023633	2.7359	0.00010608	0.0017813
BGIOSGA014319	-1.0284	6.7635e-11	2.0879e-09		BGIOSGA023647	-1.4984	0.00020317	0.003153
BGIOSGA014331	-2.3991	4.8897e-20	2.8394e-18		BGIOSGA023660	-1.4706	6.84e-07	1.81e-05
BGIOSGA014332	-3.3822	5.0288e-07	9.5857e-06		BGIOSGA023664	3.2028	9.61e-05	0.0016245
BGIOSGA014335	-2.4053	4.33e-25	3.27e-23		BGIOSGA023694	-1.0353	1.75e-14	1.13e-12
BGIOSGA014354	-1.6358	4.9845e-05	0.00066234		BGIOSGA023704	-4.3022	1.56e-51	5.4e-49
BGIOSGA014356	-2.0287	2.293e-21	1.4515e-19		BGIOSGA023726	2.1627	6.22e-07	1.65e-05
BGIOSGA014358	-2.3727	1.9511e-12	6.9723e-11		BGIOSGA023852	-1.4416	3.55e-12	1.85e-10
BGIOSGA014377	-1.5389	3.8719e-06	6.3871e-05		BGIOSGA023919	1.8265	8.88e-05	0.001515
BGIOSGA014378	-2.028	1.388e-06	2.4662e-05		BGIOSGA023934	1.5056	0.00033472	0.0048897
BGIOSGA014389	-2.0441	1.7699e-07	3.5873e-06		BGIOSGA023953	1.4026	0.0001599	0.0025719
BGIOSGA014396	-2.115	9.6788e-10	2.6225e-08		BGIOSGA023967	1.0384	2.42e-09	9.26e-08
BGIOSGA014397	-1.837	0.00010188	0.0012615		BGIOSGA023979	-2.1909	6.56e-10	2.7e-08
BGIOSGA014403	-3.5907	9.8649e-31	9.5345e-29		BGIOSGA024054	1.2277	8.69e-09	3.07e-07
BGIOSGA014408	-1.4609	8.9226e-05	0.0011193		BGIOSGA024059	-1.868	1.04e-53	3.77e-51
BGIOSGA014412	-2.276	1.0108e-07	2.1203e-06		BGIOSGA024062	-1.4536	3.26e-14	2.07e-12
BGIOSGA014422	-1.7681	4.2618e-05	0.00057494		BGIOSGA024088	-2.1477	1.84e-06	4.46e-05
BGIOSGA014439	-1.6657	5.598e-08	1.228e-06		BGIOSGA024123	-2.312	1.08e-10	4.9e-09
BGIOSGA014446	-1.0804	1.237e-05	0.00018528		BGIOSGA024163	-4.6908	1.49e-129	2.5e-126
BGIOSGA014467	1.6089	2.1467e-06	3.6979e-05		BGIOSGA024167	1.1525	3.52e-22	3.91e-20
BGIOSGA014487	-1.5904	9.8544e-14	3.9306e-12		BGIOSGA024194	2.7164	4.85e-07	1.31e-05
BGIOSGA014498	-2.307	0.00020445	0.0023573		BGIOSGA024200	-1.519	0.00023291	0.0035622
BGIOSGA014504	-2.1657	7.7645e-18	3.9934e-16		BGIOSGA024225	-1.3368	4.87e-06	0.00010877
BGIOSGA014517	1.2171	1.0851e-05	0.00016518		BGIOSGA024240	3.1691	2.81e-34	5.66e-32
BGIOSGA014538	-3.2635	3.9356e-20	2.3086e-18		BGIOSGA024281	1.074	2.15e-12	1.16e-10
BGIOSGA014539	1.4888	2.477e-07	4.9303e-06		BGIOSGA024321	-1.9167	5.19e-07	1.39e-05
BGIOSGA014541	-3.6924	6.0382e-17	2.9933e-15		BGIOSGA024325	1.6902	1.76e-11	8.61e-10
BGIOSGA014547	1.0729	5.3217e-09	1.3236e-07		BGIOSGA024403	1.6507	6.62e-79	4.52e-76
BGIOSGA014578	1.3349	2.8256e-06	4.7788e-05		BGIOSGA024414	-7.8809	7.39e-06	0.00015983
BGIOSGA014626	-2.8139	4.7242e-05	0.00063257		BGIOSGA024424	2.7576	1.62e-08	5.43e-07
BGIOSGA014629	-1.7173	0.00043203	0.0045481		BGIOSGA024440	2.0327	1.66e-51	5.67e-49
BGIOSGA014633	-2.2749	1.8701e-11	6.107e-10		BGIOSGA024479	-1.2186	0.00031371	0.0046252
BGIOSGA014635	-1.0938	0.00047128	0.0049056		BGIOSGA024535	1.2332	0.00030936	0.0045681
BGIOSGA014663	-1.5075	3.3008e-10	9.4881e-09		BGIOSGA024571	1.938	2.48e-08	8.12e-07
BGIOSGA014673	-2.6578	1.0776e-05	0.00016422		BGIOSGA024606	3.2581	1.12e-05	0.00023516
BGIOSGA014679	-1.1967	6.5334e-10	1.8216e-08		BGIOSGA024616	1.3101	6.49e-05	0.00115
BGIOSGA014710	-1.9127	3.1149e-10	8.9627e-09		BGIOSGA024622	3.9432	5.69e-14	3.48e-12
BGIOSGA014719	-2.9165	4.6141e-10	1.3132e-08		BGIOSGA024623	1.3021	1.34e-65	6.51e-63
BGIOSGA014738	-2.4589	3.9451e-08	8.919e-07		BGIOSGA024671	-1.2986	6.95e-05	0.0012182
BGIOSGA014746	-6.0842	7.3969e-05	0.00094603		BGIOSGA024672	2.481	1.11e-07	3.33e-06
BGIOSGA014800	-4.1663	2.0046e-64	5.6605e-62		BGIOSGA024730	-1.6495	5.76e-19	5.11e-17
BGIOSGA014817	-3.6082	1.8455e-06	3.2214e-05		BGIOSGA024789	-1.5772	5.15e-07	1.39e-05
BGIOSGA014831	-1.2821	1.1232e-05	0.00016991		BGIOSGA024807	-3.7295	2.2e-05	0.00043067
BGIOSGA014842	-1.5051	5.7283e-06	9.2017e-05		BGIOSGA024808	1.7329	0.00023832	0.0036372
BGIOSGA014892	1.3118	4.2657e-07	8.2457e-06		BGIOSGA024816	1.0283	1.38e-09	5.42e-08
BGIOSGA014893	3.0094	4.4109e-18	2.3099e-16		BGIOSGA024825	1.7627	2.38e-05	0.00046099
BGIOSGA014934	-3.9081	1.4078e-28	1.225e-26		BGIOSGA024842	-4.3354	2.89e-16	2.09e-14
BGIOSGA014945	-3.2227	1.3682e-49	2.5261e-47		BGIOSGA024843	-2.7897	2.04e-05	0.00040141
BGIOSGA014947	-2.0454	8.1579e-05	0.0010328		BGIOSGA024866	1.9209	3.85e-13	2.18e-11
BGIOSGA014981	-1.2077	2.6878e-07	5.3206e-06		BGIOSGA025003	-2.8487	3.51e-07	9.68e-06
BGIOSGA014985	1.5448	7.0569e-05	0.00090657		BGIOSGA025043	-2.5287	7.06e-07	1.85e-05
BGIOSGA014989	-2.2502	3.3079e-23	2.2902e-21		BGIOSGA025077	8.8413	0.00025526	0.0038568
BGIOSGA014990	-2.9662	2.6459e-27	2.1346e-25		BGIOSGA025169	-2.5736	6.31e-10	2.61e-08
BGIOSGA014994	-2.114	2.2599e-07	4.5326e-06		BGIOSGA025171	-1.2989	0.00029375	0.0043623
BGIOSGA015029	-1.5497	6.3355e-12	2.1697e-10		BGIOSGA025203	-1.1789	9.56e-09	3.36e-07
BGIOSGA015072	-1.3603	0.00029206	0.0032242		BGIOSGA025204	-1.2406	2.15e-23	2.52e-21
BGIOSGA015091	-2.6791	1.9535e-05	0.00028133		BGIOSGA025211	1.0039	4.7e-05	0.00085841
BGIOSGA015122	-3.3723	2.0033e-09	5.2405e-08		BGIOSGA025264	1.6676	1.45e-06	3.59e-05
BGIOSGA015125	1.473	7.8507e-48	1.3958e-45		BGIOSGA025296	1.3597	2.72e-06	6.4e-05
BGIOSGA015129	-4.3864	7.183e-08	1.5451e-06		BGIOSGA025316	1.2837	5.97e-26	7.88e-24
BGIOSGA015140	1.2084	3.4453e-05	0.00047163		BGIOSGA025321	-1.6002	2.71e-19	2.45e-17
BGIOSGA015205	-2.0254	5.9183e-10	1.6582e-08		BGIOSGA025334	5.1961	2.08e-06	5e-05
BGIOSGA015291	4.3621	3.1304e-101	1.96e-98		BGIOSGA025410	-1.1785	0.00013464	0.0021978
BGIOSGA015488	-1.3001	1.3608e-09	3.6225e-08		BGIOSGA025423	2.1596	0.0002718	0.0040745
BGIOSGA015512	1.4218	1.1851e-05	0.00017796		BGIOSGA025452	1.0652	6.29e-14	3.83e-12
BGIOSGA015521	-1.5613	0.00014244	0.0017129		BGIOSGA025476	-1.2921	0.00026718	0.0040199
BGIOSGA015653	-2.7473	2.225e-26	1.7462e-24		BGIOSGA025494	-2.5146	5.48e-08	1.72e-06
BGIOSGA015677	-3.6766	0.00021631	0.0024713		BGIOSGA025495	-2.464	1.52e-20	1.48e-18
BGIOSGA015687	-3.2835	1.2551e-129	1.205e-126		BGIOSGA025531	1.4447	2.21e-29	3.46e-27
BGIOSGA015737	-2.0453	5.7448e-05	0.00075415		BGIOSGA025616	1.0971	3.76e-06	8.55e-05
BGIOSGA015742	1.1499	1.1216e-06	2.0369e-05		BGIOSGA025671	-2.1276	0.00011119	0.0018595
BGIOSGA015834	2.7849	3.2014e-06	5.3707e-05		BGIOSGA025694	3.4882	6.16e-31	1.06e-28
BGIOSGA015843	1.7239	0.00047026	0.0048967		BGIOSGA025770	1.8951	4.53e-05	0.00083215
BGIOSGA015864	-1.6723	8.4503e-07	1.5622e-05		BGIOSGA025836	3.1384	3.87e-06	8.78e-05
BGIOSGA015955	-2.1927	2.9093e-06	4.903e-05		BGIOSGA025902	-1.8923	8.5e-30	1.39e-27
BGIOSGA015960	-1.5788	4.8082e-05	0.00064262		BGIOSGA025925	-3.5693	1.15e-06	2.9e-05
BGIOSGA016105	2.7304	9.9955e-08	2.0999e-06		BGIOSGA025958	-4.5286	5.4e-28	7.9e-26
BGIOSGA016129	1.3251	0.00016174	0.0019124		BGIOSGA025989	-1.1886	4.98e-12	2.54e-10
BGIOSGA016214	-3.5882	4.5502e-23	3.1353e-21		BGIOSGA026014	-2.2541	1.71e-05	0.00034343
BGIOSGA016230	1.255	2.0882e-05	0.00029893		BGIOSGA026016	1.3268	1.34e-40	3.37e-38
BGIOSGA016262	2.1652	3.2703e-14	1.338e-12		BGIOSGA026022	-2.0792	1.68e-43	4.57e-41
BGIOSGA016280	1.5218	8.7024e-17	4.2772e-15		BGIOSGA026040	-2.0497	0.00017158	0.0027216
BGIOSGA016287	-1.0753	2.9694e-08	6.8364e-07		BGIOSGA026047	1.2834	0.00026988	0.0040499
BGIOSGA016354	-4.1067	6.5131e-11	2.0128e-09		BGIOSGA026049	-3.057	4.44e-23	5.11e-21
BGIOSGA016358	-2.1258	2.2631e-10	6.5975e-09		BGIOSGA026095	1.2277	1.33e-15	9.2e-14
BGIOSGA016364	1.2056	1.7152e-12	6.1674e-11		BGIOSGA026104	-1.0498	3.45e-08	1.11e-06
BGIOSGA016388	-1.7506	6.5594e-09	1.6203e-07		BGIOSGA026150	-1.0219	0.00016714	0.0026615
BGIOSGA016390	1.994	6.0944e-258	1.9504e-254		BGIOSGA026169	3.2268	8.39e-07	2.17e-05
BGIOSGA016401	-2.0443	3.2614e-05	0.00045009		BGIOSGA026185	1.4514	0.00022198	0.0034134
BGIOSGA016449	-1.8268	3.3432e-05	0.00046006		BGIOSGA026212	-2.193	2.11e-27	3e-25
BGIOSGA016450	1.4347	3.1299e-05	0.0004332		BGIOSGA026219	-1.0136	0.00011326	0.0018885
BGIOSGA016468	-1.7401	2.5759e-09	6.6598e-08		BGIOSGA026337	1.5144	0.00031504	0.0046425
BGIOSGA016491	-2.7373	9.5287e-63	2.5649e-60		BGIOSGA026338	4.9158	2.08e-07	5.94e-06
BGIOSGA016494	-4.5391	1.0227e-24	7.6308e-23		BGIOSGA026366	1.6864	0.00022131	0.0034049
BGIOSGA016507	-2.5121	5.483e-25	4.1126e-23		BGIOSGA026372	3.2037	2.47e-06	5.87e-05
BGIOSGA016511	-3.0528	7.696e-15	3.3238e-13		BGIOSGA026374	1.5959	2.01e-10	8.85e-09
BGIOSGA016512	-1.009	1.0884e-05	0.00016551		BGIOSGA026378	-2.4188	0.0002073	0.0032117
BGIOSGA016514	-2.1524	0.00016413	0.001935		BGIOSGA026388	6.8353	5.7e-21	5.69e-19
BGIOSGA016515	-4.0358	4.3424e-12	1.5087e-10		BGIOSGA026389	3.8646	6.79e-64	3.19e-61
BGIOSGA016521	-2.1455	0.00023051	0.00262		BGIOSGA026390	2.5925	7.81e-32	1.42e-29
BGIOSGA016600	-2.0132	6.9164e-05	0.00088971		BGIOSGA026398	-1.2704	7.96e-09	2.83e-07
BGIOSGA016624	-2.8226	1.092e-37	1.4167e-35		BGIOSGA026405	1.2313	5.5e-05	0.0009911
BGIOSGA016640	1.0567	0.00021298	0.0024381		BGIOSGA026413	2.9669	4.64e-05	0.0008505
BGIOSGA016651	-1.3763	8.6837e-05	0.0010935		BGIOSGA026439	1.464	5.62e-07	1.5e-05
BGIOSGA016656	-3.5223	2.2468e-12	7.9991e-11		BGIOSGA026495	1.2728	4.23e-11	1.98e-09
BGIOSGA016666	-2.4215	3.7143e-09	9.4756e-08		BGIOSGA026530	2.1548	0.00024793	0.0037639
BGIOSGA016668	-3.2623	8.4792e-12	2.8732e-10		BGIOSGA026538	1.3392	2.24e-06	5.37e-05
BGIOSGA016719	-1.5195	1.5445e-10	4.5672e-09		BGIOSGA026540	1.1624	2.92e-06	6.81e-05
BGIOSGA016729	1.4568	4.8312e-15	2.1212e-13		BGIOSGA026548	-1.2471	0.00012601	0.002071
BGIOSGA016731	-3.7723	7.2023e-20	4.1405e-18		BGIOSGA026567	-1.4862	5.25e-09	1.9e-07
BGIOSGA016734	-2.098	0.00011016	0.0013541		BGIOSGA026643	1.4675	8.93e-13	4.97e-11
BGIOSGA016747	-1.5288	1.3094e-06	2.3439e-05		BGIOSGA026677	1.6836	3.93e-05	0.00073185
BGIOSGA016784	1.3928	0.00010287	0.0012728		BGIOSGA026730	3.5977	2.77e-134	6.1e-131
BGIOSGA016813	-1.4673	1.0142e-27	8.4427e-26		BGIOSGA026736	3.5577	0.00027452	0.004113
BGIOSGA016815	-1.1786	4.0464e-07	7.8535e-06		BGIOSGA026749	-1.5327	2.55e-05	0.00049271
BGIOSGA016843	-2.8024	1.2656e-05	0.00018916		BGIOSGA026770	-1.4494	6.57e-22	7.18e-20
BGIOSGA016847	-1.8472	1.1029e-05	0.00016718		BGIOSGA026786	-2.6227	7.76e-27	1.08e-24
BGIOSGA016861	-2.6776	7.504e-51	1.4505e-48		BGIOSGA026800	-1.7644	1.71e-25	2.2e-23
BGIOSGA016863	-2.1537	1.0167e-14	4.3513e-13		BGIOSGA026823	-1.5261	4.05e-05	0.00075018
BGIOSGA016881	-1.0174	9.4705e-11	2.8712e-09		BGIOSGA026853	-4.8632	3.63e-21	3.67e-19
BGIOSGA016904	-2.6808	2.239e-95	1.2898e-92		BGIOSGA026872	1.0117	1.11e-06	2.79e-05
BGIOSGA016941	-3.4736	3.0202e-39	4.0459e-37		BGIOSGA026879	-2.5335	0.00012352	0.0020347
BGIOSGA016943	-2.8972	5.98e-12	2.056e-10		BGIOSGA026976	-1.599	1.89e-10	8.36e-09
BGIOSGA016947	-4.6974	9.322e-54	1.9742e-51		BGIOSGA027012	-2.3869	5.75e-05	0.0010298
BGIOSGA016950	-4.0301	0.00013283	0.0016074		BGIOSGA027060	-2.0126	3.37e-05	0.0006381
BGIOSGA016969	-1.3533	5.102e-05	0.00067656		BGIOSGA027173	3.6801	2.83e-06	6.63e-05
BGIOSGA016994	-1.2289	1.8588e-17	9.4754e-16		BGIOSGA027176	1.0828	9.71e-07	2.47e-05
BGIOSGA016996	-3.7246	5.2062e-26	4.0418e-24		BGIOSGA027198	1.0276	3.3e-14	2.09e-12
BGIOSGA016998	-3.391	1.1517e-11	3.8392e-10		BGIOSGA027247	-1.6426	8.99e-06	0.00019099
BGIOSGA017040	-1.7602	4.6976e-11	1.4755e-09		BGIOSGA027394	2.1719	3.1e-14	1.97e-12
BGIOSGA017051	-1.933	1.3703e-05	0.00020375		BGIOSGA027464	1.0616	1.19e-06	2.99e-05
BGIOSGA017062	-4.3803	0.00031307	0.0034155		BGIOSGA027488	1.625	0.00013324	0.0021774
BGIOSGA017063	-1.6115	4.8971e-15	2.1468e-13		BGIOSGA027686	1.2901	0.00019056	0.0029847
BGIOSGA017088	-2.5844	6.9131e-73	2.3989e-70		BGIOSGA027693	5.8767	1.01e-08	3.52e-07
BGIOSGA017090	-1.0677	2.875e-05	0.00040041		BGIOSGA027695	6.2953	4.51e-07	1.22e-05
BGIOSGA017123	3.4294	0.00046216	0.0048246		BGIOSGA027757	2.7262	9.38e-14	5.65e-12
BGIOSGA017143	1.0987	5.1025e-06	8.2609e-05		BGIOSGA027772	-2.0593	8.51e-10	3.45e-08
BGIOSGA017163	-1.2773	9.5296e-05	0.0011877		BGIOSGA027773	-1.5957	0.0001822	0.0028742
BGIOSGA017186	-1.8594	3.1708e-72	1.0872e-69		BGIOSGA027778	-2.1535	1.09e-06	2.75e-05
BGIOSGA017200	-2.821	6.7781e-11	2.0902e-09		BGIOSGA027782	-3.1784	1.2e-25	1.56e-23
BGIOSGA017219	-2.4774	5.8516e-112	4.555e-109		BGIOSGA027841	5.4568	1.36e-09	5.35e-08
BGIOSGA017251	2.3938	4.4975e-09	1.1313e-07		BGIOSGA027874	-4.3597	9.33e-28	1.35e-25
BGIOSGA017269	-1.6985	5.3757e-05	0.00070958		BGIOSGA027913	1.3004	7.47e-73	4.28e-70
BGIOSGA017285	3.4132	7.2975e-12	2.4786e-10		BGIOSGA027919	2.8531	4.08e-08	1.3e-06
BGIOSGA017295	-8.6854	1.9281e-07	3.8943e-06		BGIOSGA027952	5.0273	2.22e-05	0.00043435
BGIOSGA017321	-2.8104	3.5136e-53	7.3332e-51		BGIOSGA027959	-2.7956	3.91e-12	2.02e-10
BGIOSGA017326	-6.641	1.0005e-46	1.6951e-44		BGIOSGA027960	-2.256	5.91e-06	0.00012974
BGIOSGA017327	-2.1466	2.7515e-09	7.1011e-08		BGIOSGA027993	1.2594	1.28e-12	7.06e-11
BGIOSGA017334	-1.7129	0.00022641	0.0025773		BGIOSGA028019	2.2094	6.03e-14	3.68e-12
BGIOSGA017340	-2.3071	1.1097e-32	1.2016e-30		BGIOSGA028103	1.2613	7.61e-19	6.69e-17
BGIOSGA017385	-2.1593	2.6436e-20	1.5635e-18		BGIOSGA028181	-2.3353	1.28e-12	7.03e-11
BGIOSGA017399	1.5151	6.8151e-07	1.2729e-05		BGIOSGA028232	1.0327	1.21e-05	0.00025106
BGIOSGA017440	-2.0753	0.00040751	0.0043278		BGIOSGA028486	1.7342	8.27e-07	2.14e-05
BGIOSGA017445	-1.1169	0.00042539	0.0044945		BGIOSGA028505	1.0561	5.28e-18	4.35e-16
BGIOSGA017452	-1.7129	3.4636e-05	0.00047391		BGIOSGA028522	1.9439	5.99e-05	0.0010682
BGIOSGA017460	2.0143	2.0353e-05	0.00029179		BGIOSGA028607	1.785	3.79e-17	2.94e-15
BGIOSGA017462	-2.9208	1.5085e-55	3.2183e-53		BGIOSGA028621	1.0818	7.6e-15	5.03e-13
BGIOSGA017475	-1.7884	2.124e-27	1.7232e-25		BGIOSGA028631	-2.9101	3.97e-34	7.96e-32
BGIOSGA017477	1.1227	6.0579e-22	3.9386e-20		BGIOSGA028650	-1.2196	1.62e-08	5.42e-07
BGIOSGA017479	-2.5918	1.9386e-63	5.3177e-61		BGIOSGA028658	-1.6634	3.43e-11	1.62e-09
BGIOSGA017481	-2.5435	4.1381e-07	8.0259e-06		BGIOSGA028700	1.3916	3.27e-05	0.00061965
BGIOSGA017493	1.0214	0.0003487	0.0037572		BGIOSGA028709	6.98	0.00028135	0.0042
BGIOSGA017494	4.212	4.5321e-10	1.2911e-08		BGIOSGA028722	2.3722	2.6e-11	1.25e-09
BGIOSGA017506	-2.6224	2.0844e-07	4.1953e-06		BGIOSGA028741	-1.2945	1.1e-10	4.97e-09
BGIOSGA017521	-2.6294	3.3716e-85	1.5414e-82		BGIOSGA028755	-4.2381	0.00018713	0.0029471
BGIOSGA017566	-2.6353	1.0338e-18	5.5343e-17		BGIOSGA028759	-2.8792	4.13e-19	3.67e-17
BGIOSGA017578	-1.1102	0.00013809	0.0016655		BGIOSGA028777	1.7502	1.48e-05	0.00030147
BGIOSGA017588	-1.2569	2.3149e-18	1.2211e-16		BGIOSGA028779	-1.6193	4.57e-09	1.67e-07
BGIOSGA017601	-2.0635	1.36e-15	6.2177e-14		BGIOSGA028780	1.0116	4.27e-05	0.00078877
BGIOSGA017604	-3.3798	3.2093e-16	1.5253e-14		BGIOSGA028838	-4.2467	6.92e-115	9.45e-112
BGIOSGA017625	1.1957	0.00047197	0.0049092		BGIOSGA028855	1.0388	7.96e-05	0.0013694
BGIOSGA017630	-3.6704	4.775e-37	6.0056e-35		BGIOSGA028861	1.1675	5.69e-05	0.0010229
BGIOSGA017631	-3.1661	1.4037e-11	4.6257e-10		BGIOSGA028878	-1.4111	4.05e-12	2.08e-10
BGIOSGA017646	-3.1881	5.9648e-21	3.6709e-19		BGIOSGA028887	1.2932	4.05e-05	0.00075018
BGIOSGA017709	-2.8053	8.8318e-60	2.1376e-57		BGIOSGA028891	1.1321	2.35e-06	5.62e-05
BGIOSGA017715	1.3179	9.1912e-06	0.00014225		BGIOSGA028915	1.9454	1.68e-13	9.81e-12
BGIOSGA017730	3.2587	1.4181e-05	0.0002101		BGIOSGA028928	1.3429	4e-06	9.06e-05
BGIOSGA017731	1.247	0.00016146	0.0019098		BGIOSGA028949	1.1144	1.7e-10	7.54e-09
BGIOSGA017739	-1.1346	1.3306e-06	2.3788e-05		BGIOSGA028955	-1.3747	3.32e-29	5.14e-27
BGIOSGA017742	-2.3932	7.6428e-05	0.00097445		BGIOSGA028958	1.6504	8.4e-12	4.19e-10
BGIOSGA017753	-5.0946	1.5136e-05	0.00022208		BGIOSGA029009	2.8265	2.76e-05	0.00052905
BGIOSGA017796	-1.8668	8.8641e-33	9.6341e-31		BGIOSGA029015	-2.7624	2.53e-14	1.62e-12
BGIOSGA017797	-2.2304	9.3053e-12	3.142e-10		BGIOSGA029025	1.2585	4e-10	1.7e-08
BGIOSGA017804	-1.7261	1.1588e-09	3.099e-08		BGIOSGA029184	-2.1445	2.06e-35	4.37e-33
BGIOSGA017834	-3.114	7.0472e-170	1.0683e-166		BGIOSGA029191	-1.0753	8.91e-09	3.14e-07
BGIOSGA017875	-1.9979	1.0652e-12	3.8835e-11		BGIOSGA029200	-1.6712	4.21e-12	2.16e-10
BGIOSGA017876	-4.2522	8.43e-14	3.37e-12		BGIOSGA029234	-1.2394	5.89e-05	0.001053
BGIOSGA017878	-1.9698	7.3332e-46	1.2001e-43		BGIOSGA029255	-3.1517	6.84e-61	2.92e-58
BGIOSGA017883	-2.4344	4.4623e-09	1.1235e-07		BGIOSGA029256	-2.4751	1.68e-10	7.49e-09
BGIOSGA017885	-1.1751	0.00010874	0.001339		BGIOSGA029283	-1.3155	4.29e-05	0.00079092
BGIOSGA017886	-5.485	1.8104e-06	3.164e-05		BGIOSGA029341	3.1869	6.94e-07	1.83e-05
BGIOSGA017916	-1.8469	6.2631e-06	9.9939e-05		BGIOSGA029354	3.7875	1.14e-05	0.00023844
BGIOSGA017925	-2.9916	0.00020271	0.0023382		BGIOSGA029359	1.3344	1.97e-11	9.59e-10
BGIOSGA017926	-1.954	1.1016e-09	2.9624e-08		BGIOSGA029374	1.2014	7.7e-11	3.52e-09
BGIOSGA017935	-2.2249	2.0642e-19	1.159e-17		BGIOSGA029377	1.0941	7.5e-22	8.14e-20
BGIOSGA017949	-2.3363	2.8569e-21	1.7966e-19		BGIOSGA029400	1.0111	1.78e-05	0.00035599
BGIOSGA017962	-2.7185	6.8131e-11	2.0965e-09		BGIOSGA029415	-2.211	5.88e-31	1.02e-28
BGIOSGA017964	-1.1549	0.00017858	0.0020899		BGIOSGA029416	-5.0236	8.92e-32	1.61e-29
BGIOSGA017975	-3.2034	0.00031799	0.0034626		BGIOSGA029417	-6.1698	6.68e-80	4.91e-77
BGIOSGA017976	-1.0012	7.1906e-06	0.00011361		BGIOSGA029453	1.2626	7.19e-05	0.00125
BGIOSGA017979	-1.4346	8.5887e-17	4.2286e-15		BGIOSGA029463	-1.0756	1.44e-08	4.89e-07
BGIOSGA017982	-3.3068	3.5268e-05	0.00048165		BGIOSGA029497	1.7883	3.99e-09	1.48e-07
BGIOSGA017984	1.7128	1.0049e-06	1.8331e-05		BGIOSGA029506	1.0669	2.41e-12	1.29e-10
BGIOSGA017996	2.7188	0.00036423	0.0038999		BGIOSGA029566	-4.3852	0.00013753	0.0022398
BGIOSGA018017	-1.1398	1.3657e-08	3.2696e-07		BGIOSGA029581	-1.6925	6.76e-05	0.001189
BGIOSGA018019	-1.5879	2.2864e-08	5.3408e-07		BGIOSGA029609	-2.3116	7.61e-06	0.0001638
BGIOSGA018034	-5.6584	0.00032472	0.003524		BGIOSGA029629	1.4669	3.13e-05	0.00059571
BGIOSGA018050	-1.1595	0.00026131	0.0029296		BGIOSGA029650	-2.0825	0.00021337	0.0032863
BGIOSGA018055	-1.5038	7.8606e-10	2.1583e-08		BGIOSGA029652	-1.5764	3.33e-05	0.00063069
BGIOSGA018067	-1.4779	2.3888e-13	9.2105e-12		BGIOSGA029726	1.0595	8.35e-05	0.0014318
BGIOSGA018101	-2.0102	1.7488e-12	6.2805e-11		BGIOSGA029756	1.9634	5.33e-08	1.68e-06
BGIOSGA018153	-3.476	4.9382e-22	3.2325e-20		BGIOSGA029771	1.9154	0.00012164	0.0020084
BGIOSGA018169	1.183	1.8862e-06	3.2862e-05		BGIOSGA029772	-3.2596	8.88e-22	9.46e-20
BGIOSGA018202	1.8954	2.5099e-21	1.5853e-19		BGIOSGA029778	7.9817	1.23e-08	4.24e-07
BGIOSGA018214	1.7713	1.8202e-06	3.1793e-05		BGIOSGA029790	1.786	3.56e-06	8.14e-05
BGIOSGA018242	1.6046	1.4446e-05	0.00021359		BGIOSGA029799	1.2796	5.74e-05	0.0010293
BGIOSGA018296	-3.966	3.0751e-13	1.1731e-11		BGIOSGA029804	1.5296	0.00032658	0.0047879
BGIOSGA018321	-3.1932	1.4123e-19	7.9761e-18		BGIOSGA029810	-2.4125	1.92e-06	4.63e-05
BGIOSGA018389	-4.0975	5.3658e-10	1.5162e-08		BGIOSGA029832	-2.9552	3.04e-08	9.86e-07
BGIOSGA018390	-3.1039	4.5414e-06	7.4066e-05		BGIOSGA029852	-1.3331	1.52e-15	1.04e-13
BGIOSGA018414	-5.0006	1.0928e-12	3.9791e-11		BGIOSGA029860	1.0687	3.07e-10	1.33e-08
BGIOSGA018439	4.7947	2.7951e-24	2.0228e-22		BGIOSGA029893	5.5789	7.59e-05	0.0013134
BGIOSGA018441	6.1834	6.8744e-08	1.4853e-06		BGIOSGA029896	-1.4703	1.33e-07	3.92e-06
BGIOSGA018508	-2.7251	3.2337e-16	1.5344e-14		BGIOSGA029947	-5.1844	6.44e-08	1.99e-06
BGIOSGA018537	1.0324	6.018e-05	0.00078466		BGIOSGA029950	-5.2875	8.45e-07	2.18e-05
BGIOSGA018547	-1.0111	3.3595e-05	0.00046099		BGIOSGA029951	-5.2379	1.52e-05	0.00030921
BGIOSGA018556	-2.109	5.1265e-27	4.0788e-25		BGIOSGA029976	1.5852	4.62e-05	0.00084734
BGIOSGA018573	-1.5103	4.4739e-22	2.9353e-20		BGIOSGA029990	1.771	3.21e-06	7.42e-05
BGIOSGA018582	-2.679	3.8145e-05	0.00051824		BGIOSGA030039	2.061	4.01e-09	1.48e-07
BGIOSGA018592	2.176	5.5208e-07	1.0447e-05		BGIOSGA030140	1.3529	3.02e-07	8.4e-06
BGIOSGA018602	-3.1443	6.2405e-06	9.9633e-05		BGIOSGA030166	1.5406	0.0002842	0.0042403
BGIOSGA018604	-3.4838	5.6668e-10	1.5924e-08		BGIOSGA030193	2.4619	3.01e-10	1.3e-08
BGIOSGA018605	-4.1074	0.0002122	0.0024301		BGIOSGA030195	-1.3996	1.27e-11	6.28e-10
BGIOSGA018665	-4.0362	0.00022542	0.0025683		BGIOSGA030202	2.3423	7.64e-07	1.99e-05
BGIOSGA018678	1.0537	2.0906e-07	4.202e-06		BGIOSGA030237	1.1312	2.9e-05	0.0005545
BGIOSGA018692	-3.6826	6.0161e-05	0.00078466		BGIOSGA030245	-1.5208	6.56e-07	1.74e-05
BGIOSGA018699	-1.1382	9.2041e-06	0.00014237		BGIOSGA030292	5.3145	1.02e-30	1.73e-28
BGIOSGA018734	-2.2197	9.8244e-18	5.0349e-16		BGIOSGA030307	-2.3873	3.31e-05	0.00062712
BGIOSGA018735	1.1964	1.0984e-05	0.00016669		BGIOSGA030409	4.5464	2.46e-54	9.05e-52
BGIOSGA018760	-1.8064	4.7291e-07	9.0623e-06		BGIOSGA030535	3.1611	1.03e-14	6.74e-13
BGIOSGA018789	-2.0271	6.9889e-47	1.1982e-44		BGIOSGA030626	-3.6161	2.48e-111	3.24e-108
BGIOSGA018851	-1.4149	7.1453e-48	1.2783e-45		BGIOSGA030660	-1.5205	0.00014034	0.0022804
BGIOSGA018863	-5.4869	7.284e-17	3.5985e-15		BGIOSGA030739	-1.7591	1.72e-05	0.00034477
BGIOSGA018883	2.2857	1.4419e-07	2.9685e-06		BGIOSGA030791	-2.2055	7.91e-34	1.57e-31
BGIOSGA018888	-1.1452	0.00017127	0.0020118		BGIOSGA030816	2.0204	2.64e-92	2.7e-89
BGIOSGA018890	1.9312	2.9301e-07	5.7803e-06		BGIOSGA030826	-1.4561	8.22e-07	2.13e-05
BGIOSGA018891	-2.8261	7.2364e-29	6.4929e-27		BGIOSGA030829	1.3192	1.72e-09	6.67e-08
BGIOSGA018920	-2.0988	1.2036e-75	4.388e-73		BGIOSGA030907	-7.5872	2.9e-21	2.99e-19
BGIOSGA018921	-2.8265	3.213e-14	1.3182e-12		BGIOSGA030985	-1.733	4.85e-05	0.00088449
BGIOSGA018922	-3.8449	4.3652e-16	2.0577e-14		BGIOSGA030989	-1.9465	2.46e-08	8.04e-07
BGIOSGA018926	1.3428	0.00045368	0.0047481		BGIOSGA030997	3.1299	5.45e-06	0.0001204
BGIOSGA018938	1.9902	5.0005e-17	2.4961e-15		BGIOSGA031004	-1.8805	6.42e-07	1.7e-05
BGIOSGA018948	-1.3865	4.9952e-07	9.528e-06		BGIOSGA031005	-1.2349	1.21e-07	3.6e-06
BGIOSGA018994	-2.1298	6.8269e-18	3.5301e-16		BGIOSGA031075	-4.7366	8.35e-22	8.96e-20
BGIOSGA019002	1.2596	3.8336e-05	0.00052059		BGIOSGA031076	-3.5954	5.6e-15	3.72e-13
BGIOSGA019032	-1.8926	1.531e-07	3.1386e-06		BGIOSGA031098	-3.1154	4.1e-05	0.00075823
BGIOSGA019054	-2.2841	7.8756e-274	3.7805e-270		BGIOSGA031100	1.4514	1.51e-05	0.00030649
BGIOSGA019075	1.8589	0.00020255	0.0023373		BGIOSGA031183	-3.1059	1e-13	6.02e-12
BGIOSGA019094	1.4749	5.1196e-05	0.00067858		BGIOSGA031231	1.2476	2.04e-30	3.39e-28
BGIOSGA019108	-2.6995	8.9013e-74	3.1265e-71		BGIOSGA031289	1.4866	6.93e-29	1.05e-26
BGIOSGA019110	-2.548	3.5465e-07	6.9298e-06		BGIOSGA031338	2.2886	5.32e-12	2.7e-10
BGIOSGA019112	-1.922	1.5098e-67	4.626e-65		BGIOSGA031347	-1.1765	6.82e-08	2.1e-06
BGIOSGA019118	-1.4681	4.4723e-52	9.2008e-50		BGIOSGA031390	-2.5057	1.22e-06	3.05e-05
BGIOSGA019131	1.2588	6.3767e-21	3.9077e-19		BGIOSGA031427	4.1273	1.19e-171	3.78e-168
BGIOSGA019133	-2.7709	7.7348e-11	2.3549e-09		BGIOSGA031429	1.5332	3.1e-24	3.83e-22
BGIOSGA019137	-3.0589	5.0845e-15	2.2256e-13		BGIOSGA031440	1.3294	0.00011954	0.0019795
BGIOSGA019140	-1.167	8.0788e-11	2.4571e-09		BGIOSGA031474	2.8592	5.4e-08	1.7e-06
BGIOSGA019148	1.3219	5.3268e-08	1.1748e-06		BGIOSGA031535	1.8898	0.00011226	0.0018741
BGIOSGA019160	1.2232	4.6492e-05	0.0006237		BGIOSGA031551	-3.8248	3.28e-08	1.06e-06
BGIOSGA019177	-3.6134	1.3515e-06	2.4073e-05		BGIOSGA031561	1.1649	2.36e-06	5.64e-05
BGIOSGA019178	-2.2353	4.5724e-20	2.6713e-18		BGIOSGA031572	-1.4116	1.18e-05	0.00024634
BGIOSGA019236	-1.7729	1.9233e-08	4.537e-07		BGIOSGA031575	4.199	1.46e-08	4.95e-07
BGIOSGA019252	1.1328	1.3806e-10	4.1162e-09		BGIOSGA031606	-1.1847	5.7e-07	1.52e-05
BGIOSGA019259	1.2971	2.8635e-06	4.8346e-05		BGIOSGA031671	-2.2584	1.04e-09	4.15e-08
BGIOSGA019276	-2.1987	2.0965e-16	1.0098e-14		BGIOSGA031688	-1.725	9.05e-05	0.0015421
BGIOSGA019277	-3.285	1.1762e-05	0.0001769		BGIOSGA031737	-4.0837	5.02e-10	2.1e-08
BGIOSGA019282	1.0444	5.6518e-08	1.2379e-06		BGIOSGA031783	-4.6451	7.06e-07	1.85e-05
BGIOSGA019291	-4.8732	1.9863e-60	4.9749e-58		BGIOSGA031784	-3.0257	5.33e-56	2.09e-53
BGIOSGA019292	-4.5711	5.4e-22	3.5188e-20		BGIOSGA031785	-4.5491	3.6e-42	9.54e-40
BGIOSGA019328	1.313	6.3096e-06	0.00010055		BGIOSGA031786	-3.2076	2.15e-28	3.23e-26
BGIOSGA019338	-4.8686	8.3327e-14	3.3333e-12		BGIOSGA031787	-5.8929	1.12e-32	2.11e-30
BGIOSGA019365	1.195	0.00028606	0.0031653		BGIOSGA031788	-2.8196	2.11e-81	1.64e-78
BGIOSGA019378	4.5265	6.3876e-15	2.7833e-13		BGIOSGA031790	1.5981	6.39e-07	1.69e-05
BGIOSGA019397	2.1354	1.9744e-14	8.2777e-13		BGIOSGA031793	-2.3146	9.1e-33	1.74e-30
BGIOSGA019408	2.8765	0.00012681	0.0015404		BGIOSGA031802	3.1174	1.32e-08	4.53e-07
BGIOSGA019450	1.3624	1.0577e-05	0.00016153		BGIOSGA031803	9.4568	7.74e-10	3.15e-08
BGIOSGA019502	-2.3527	2.9374e-31	2.9174e-29		BGIOSGA031804	5.2643	2.37e-06	5.65e-05
BGIOSGA019503	-2.8345	2.2604e-16	1.0869e-14		BGIOSGA031805	4.77	0.00011675	0.00194
BGIOSGA019586	-1.7248	1.563e-06	2.7634e-05		BGIOSGA031806	11.526	3.63e-14	2.28e-12
BGIOSGA019596	1.046	5.4594e-07	1.0345e-05		BGIOSGA031909	1.7571	3.87e-05	0.00072211
BGIOSGA019612	-2.7601	9.2297e-08	1.9561e-06		BGIOSGA031936	1.7604	0.00013022	0.0021333
BGIOSGA019635	1.6403	3.43e-07	6.725e-06		BGIOSGA031944	2.8908	4.86e-05	0.00088689
BGIOSGA019646	-2.7067	1.64e-43	2.51e-41		BGIOSGA031997	-1.3921	6.73e-10	2.76e-08
BGIOSGA019650	1.4913	5.2021e-09	1.2972e-07		BGIOSGA032002	-3.4843	9.23e-30	1.5e-27
BGIOSGA019666	-2.7047	0.00025569	0.0028712		BGIOSGA032057	1.5634	1.32e-10	5.93e-09
BGIOSGA019672	1.0127	4.0549e-13	1.5287e-11		BGIOSGA032160	-2.3663	4.58e-23	5.25e-21
BGIOSGA019777	-4.943	5.7766e-07	1.0896e-05		BGIOSGA032167	-7.4589	1.21e-79	8.7e-77
BGIOSGA019812	-2.0609	2.1778e-15	9.7857e-14		BGIOSGA032247	1.121	1.77e-89	1.69e-86
BGIOSGA019845	-2.201	1.6768e-47	2.9448e-45		BGIOSGA032264	1.6648	7.55e-08	2.31e-06
BGIOSGA019863	-1.3604	6.0346e-05	0.00078611		BGIOSGA032265	2.1376	4.89e-07	1.32e-05
BGIOSGA019907	2.437	0.00042605	0.0044965		BGIOSGA032280	8.3981	5.32e-06	0.00011791
BGIOSGA019909	-2.8418	5.9079e-17	2.9338e-15		BGIOSGA032288	-1.5566	3.65e-05	0.00068351
BGIOSGA019932	-2.2406	1.8492e-18	9.8451e-17		BGIOSGA032395	-4.0609	1.09e-71	5.9e-69
BGIOSGA019942	-1.8727	0.00032527	0.0035286		BGIOSGA032462	-1.044	1.54e-10	6.87e-09
BGIOSGA019945	-2.5191	1.3021e-08	3.1227e-07		BGIOSGA032529	-1.3813	4.44e-07	1.21e-05
BGIOSGA019962	-2.5202	1.6036e-33	1.7764e-31		BGIOSGA032580	3.41	4.68e-10	1.97e-08
BGIOSGA019976	-4.3129	8.4414e-05	0.0010654		BGIOSGA032599	5.1438	4.66e-05	0.0008524
BGIOSGA020018	-1.8027	4.2327e-06	6.9504e-05		BGIOSGA032686	2.2573	0.00017548	0.0027789
BGIOSGA020022	-4.2365	6.1197e-12	2.0983e-10		BGIOSGA032706	-1.5248	8.41e-15	5.55e-13
BGIOSGA020048	-2.9797	1.1204e-58	2.645e-56		BGIOSGA032733	1.0792	3.23e-09	1.21e-07
BGIOSGA020093	-2.1406	4.892e-05	0.00065141		BGIOSGA032767	2.8215	3.48e-05	0.00065519
BGIOSGA020105	-1.5952	4.8903e-05	0.00065141		BGIOSGA032777	-1.598	2.5e-06	5.94e-05
BGIOSGA020106	-3.1516	6.325e-31	6.2175e-29		BGIOSGA032792	1.0934	1.79e-16	1.31e-14
BGIOSGA020107	-3.0964	1.2589e-39	1.7103e-37		BGIOSGA032814	6.0601	2.98e-13	1.7e-11
BGIOSGA020115	-1.4979	5.4721e-28	4.6492e-26		BGIOSGA032815	6.0795	3.44e-05	0.00064922
BGIOSGA020151	-1.4186	0.0002287	0.0026015		BGIOSGA032818	1.7898	5e-05	0.00091068
BGIOSGA020160	-2.6055	7.3655e-06	0.00011612		BGIOSGA032916	1.3219	1.32e-05	0.00027156
BGIOSGA020188	1.6717	0.00011533	0.0014147		BGIOSGA033067	-1.9566	5.26e-198	2.51e-194
BGIOSGA020194	-1.9608	1.5655e-10	4.6242e-09		BGIOSGA033070	-1.6795	2.59e-06	6.12e-05
BGIOSGA020205	-1.0998	6.5382e-05	0.00084711		BGIOSGA033084	-1.0488	0.00018937	0.0029725
BGIOSGA020217	-3.8562	2.7197e-57	6.0723e-55		BGIOSGA033142	1.2749	4.15e-06	9.36e-05
BGIOSGA020225	-3.4345	6.7835e-06	0.00010765		BGIOSGA033144	1.2392	1.48e-05	0.00030121
BGIOSGA020241	-5.8513	5.2269e-09	1.3022e-07		BGIOSGA033178	-1.7799	2.15e-07	6.13e-06
BGIOSGA020243	-1.321	1.5849e-06	2.7972e-05		BGIOSGA033181	-2.6	7.49e-07	1.96e-05
BGIOSGA020289	-2.7001	4.9682e-05	0.00066094		BGIOSGA033183	2.8683	1.48e-06	3.65e-05
BGIOSGA020305	-4.043	0.00021577	0.0024665		BGIOSGA033209	-2.9431	5.05e-16	3.62e-14
BGIOSGA020319	-2.5586	1.2687e-07	2.6346e-06		BGIOSGA033216	-2.335	2.82e-18	2.35e-16
BGIOSGA020327	-2.5563	2.6543e-31	2.6545e-29		BGIOSGA033296	-3.0221	4.98e-29	7.63e-27
BGIOSGA020341	-2.2702	1.7779e-22	1.1881e-20		BGIOSGA033300	1.2188	2.37e-05	0.00046076
BGIOSGA020349	-1.8337	0.00015922	0.0018871		BGIOSGA033329	1.3946	7.48e-08	2.3e-06
BGIOSGA020354	-2.3016	1.8353e-16	8.899e-15		BGIOSGA033338	2.4272	8.5e-08	2.59e-06
BGIOSGA020357	1.3518	1.6829e-06	2.9555e-05		BGIOSGA033360	-1.6492	4.95e-06	0.00011036
BGIOSGA020360	-3.3372	1.9331e-41	2.7979e-39		BGIOSGA033384	-1.8115	2.12e-09	8.16e-08
BGIOSGA020384	-2.6912	2.0528e-06	3.5446e-05		BGIOSGA033387	1.4109	2.31e-15	1.57e-13
BGIOSGA020437	1.3321	0.00020818	0.0023918		BGIOSGA033397	6.7887	1.77e-07	5.13e-06
BGIOSGA020442	-4.779	2.4117e-16	1.1577e-14		BGIOSGA033406	-5.6159	1.78e-75	1.13e-72
BGIOSGA020443	-2.7454	2.5969e-08	6.0124e-07		BGIOSGA033424	1.1672	1.44e-08	4.91e-07
BGIOSGA020451	-4.7169	1.293e-07	2.6735e-06		BGIOSGA033425	-1.9422	4.61e-20	4.36e-18
BGIOSGA020459	-3.2991	1.2905e-08	3.1001e-07		BGIOSGA033476	3.0468	2.21e-11	1.07e-09
BGIOSGA020466	1.5769	4.5021e-05	0.00060565		BGIOSGA033527	3.8967	1.09e-20	1.07e-18
BGIOSGA020477	-3.7151	2.8885e-08	6.6557e-07		BGIOSGA033532	-3.4892	1.11e-45	3.21e-43
BGIOSGA020486	-1.9908	8.0607e-06	0.00012604		BGIOSGA033575	8.5944	1.45e-06	3.58e-05
BGIOSGA020501	-1.6554	0.00045624	0.0047714		BGIOSGA033576	10.591	3.18e-09	1.2e-07
BGIOSGA020510	-4.171	1.352e-07	2.7893e-06		BGIOSGA033582	-1.115	6.09e-11	2.8e-09
BGIOSGA020525	-2.1492	4.37e-29	3.9705e-27		BGIOSGA033638	1.8876	0.00018991	0.0029778
BGIOSGA020543	-1.5849	3.3548e-05	0.00046073		BGIOSGA033659	-2.5865	7.11e-05	0.0012404
BGIOSGA020546	1.2838	2.1309e-05	0.00030413		BGIOSGA033688	3.0654	4.08e-13	2.31e-11
BGIOSGA020577	1.6276	2.1104e-14	8.8094e-13		BGIOSGA033689	2.4369	5.01e-28	7.36e-26
BGIOSGA020609	-1.5925	6.463e-07	1.2103e-05		BGIOSGA033715	-2.1756	4.39e-08	1.39e-06
BGIOSGA020610	-1.731	1.1656e-11	3.8766e-10		BGIOSGA033774	-3.1233	2.59e-10	1.13e-08
BGIOSGA020631	-2.1597	0.00011565	0.001418		BGIOSGA033865	-1.0783	0.00033044	0.0048396
BGIOSGA020641	-2.558	1.7798e-09	4.6858e-08		BGIOSGA033928	2.3188	2.95e-06	6.88e-05
BGIOSGA020682	1.1185	1.0897e-10	3.2829e-09		BGIOSGA034012	1.5704	5.86e-05	0.0010473
BGIOSGA020688	3.269	2.9265e-24	2.1125e-22		BGIOSGA034046	1.2847	8.54e-130	1.53e-126
BGIOSGA020701	2.6651	5.837e-09	1.4493e-07		BGIOSGA034071	1.0195	2.13e-06	5.11e-05
BGIOSGA020720	-1.1466	2.3436e-06	4.0179e-05		BGIOSGA034101	2.2839	4.94e-11	2.29e-09
BGIOSGA020732	-1.9691	1.089e-13	4.3142e-12		BGIOSGA034103	3.5383	3.64e-06	8.31e-05
BGIOSGA020773	-3.0801	0.00012868	0.0015619		BGIOSGA034207	2.1911	1.67e-07	4.84e-06
BGIOSGA020778	-2.5781	6.1439e-57	1.3612e-54		BGIOSGA034244	5.045	0.00016104	0.0025855
BGIOSGA020785	-1.2675	0.00021683	0.0024752		BGIOSGA034249	1.0771	3.93e-05	0.00073065
BGIOSGA020802	-1.3891	2.1437e-15	9.6472e-14		BGIOSGA034294	-1.9947	6.98e-06	0.00015111
BGIOSGA020815	-1.622	1.3001e-08	3.1206e-07		BGIOSGA034297	3.9927	5.27e-37	1.18e-34
BGIOSGA020819	-1.3754	4.527e-08	1.0115e-06		BGIOSGA034298	4.8628	1.85e-15	1.27e-13
BGIOSGA020821	-2.0464	0.00031259	0.0034116		BGIOSGA034312	4.124	9.08e-98	1e-94
BGIOSGA020825	1.5826	1.9277e-10	5.648e-09		BGIOSGA034313	-3.3656	1.63e-21	1.72e-19
BGIOSGA020862	-1.4503	5.9032e-11	1.8322e-09		BGIOSGA034327	-3.3738	0.00027862	0.0041658
BGIOSGA020871	3.0682	0.00010852	0.0013368		BGIOSGA034421	-3.8878	0.0002878	0.0042874
BGIOSGA020921	-2.2581	8.2157e-15	3.5371e-13		BGIOSGA034432	5.1736	9.78e-06	0.00020667
BGIOSGA020926	-2.9839	9.3952e-06	0.00014486		BGIOSGA034486	-3.8047	8.44e-75	5.26e-72
BGIOSGA020960	-4.2448	2.1236e-30	2.0186e-28		BGIOSGA034500	1.2806	1.46e-18	1.25e-16
BGIOSGA020969	-4.1237	5.9521e-08	1.2997e-06		BGIOSGA034502	1.3604	2.76e-23	3.23e-21
BGIOSGA021046	-1.2083	4.2741e-06	7.0105e-05		BGIOSGA034552	1.6986	0.00021376	0.0032904
BGIOSGA021047	-1.5771	0.00013972	0.0016831		BGIOSGA034619	3.3238	1.87e-07	5.39e-06
BGIOSGA021067	-3.7847	5.3694e-10	1.5162e-08		BGIOSGA034632	1.4038	0.00013533	0.0022077
BGIOSGA021069	1.5776	1.3315e-11	4.3927e-10		BGIOSGA034640	1.2873	0.00014331	0.0023247
BGIOSGA021076	2.6769	5.0651e-90	2.6051e-87		BGIOSGA034654	1.0794	2.45e-08	8.03e-07
BGIOSGA021154	2.6777	4.0401e-09	1.0243e-07		BGIOSGA034669	3.8337	1.55e-05	0.00031404
BGIOSGA021171	-2.0545	3.8948e-15	1.7258e-13		BGIOSGA034670	1.7983	5.07e-08	1.6e-06
BGIOSGA021174	-4.9158	2.408e-06	4.116e-05		BGIOSGA034683	-1.8842	0.00033619	0.0049063
BGIOSGA021180	2.0094	3.6547e-07	7.1123e-06		BGIOSGA034703	-1.7668	0.00029794	0.00442
BGIOSGA021183	1.2503	0.00026674	0.0029804		BGIOSGA034712	2.1806	6.86e-06	0.00014898
BGIOSGA021196	-3.2561	1.7224e-05	0.00025029		BGIOSGA034730	3.2553	5.71e-12	2.89e-10
BGIOSGA021343	-1.2781	0.00017347	0.0020357		BGIOSGA034765	1.4494	6.85e-06	0.00014879
BGIOSGA021344	-3.7023	4.2652e-113	3.5099e-110		BGIOSGA034784	-1.7499	0.00013079	0.0021398
BGIOSGA021377	1.8741	2.2623e-13	8.7461e-12		BGIOSGA034792	1.1221	4.35e-05	0.00080018
BGIOSGA021426	-2.0474	3.2092e-12	1.1272e-10		BGIOSGA034796	-1.7306	9.87e-06	0.00020831
BGIOSGA021439	1.6428	7.8782e-10	2.161e-08		BGIOSGA034863	-1.2493	7.12e-05	0.0012409
BGIOSGA021502	-1.5662	1.1754e-05	0.0001769		BGIOSGA035008	1.9685	2.69e-11	1.29e-09
BGIOSGA021512	1.3974	2.32e-05	0.00032868		BGIOSGA035025	1.3999	0.00020124	0.0031314
BGIOSGA021514	-2.3051	1.2788e-32	1.3744e-30		BGIOSGA035037	-2.0298	7.42e-05	0.0012853
BGIOSGA021518	-2.376	9.7236e-23	6.6052e-21		BGIOSGA035038	-1.509	8.15e-06	0.00017456
BGIOSGA021522	1.3841	0.00015257	0.0018196		BGIOSGA035077	-1.4646	0.00024596	0.003742
BGIOSGA021615	1.3976	2.0858e-08	4.904e-07		BGIOSGA035159	1.0812	0.0001703	0.0027043
BGIOSGA021616	1.2751	1.6051e-08	3.8237e-07		BGIOSGA035192	-7.9108	1.81e-37	4.19e-35
BGIOSGA021621	-2.5365	2.8899e-07	5.705e-06		BGIOSGA035193	-7.8413	6.18e-16	4.38e-14
BGIOSGA021653	1.6933	0.00032868	0.0035603		BGIOSGA035267	-1.5878	2.25e-08	7.45e-07
BGIOSGA021664	1.2812	1.2517e-12	4.5462e-11		BGIOSGA035273	2.8023	1.79e-12	9.7e-11
BGIOSGA021667	-4.3289	1.8454e-07	3.7378e-06		BGIOSGA035541	1.6742	4.62e-06	0.00010348
BGIOSGA021669	-4.4282	1.0398e-44	1.6545e-42		BGIOSGA035597	-2.8175	4.72e-16	3.4e-14
BGIOSGA021670	-3.8239	1.8612e-24	1.3571e-22		BGIOSGA035667	-3.7065	4.51e-06	0.00010118
BGIOSGA021672	-1.7615	5.6835e-08	1.243e-06		BGIOSGA035695	-5.0618	5.9e-06	0.00012967
BGIOSGA021680	-1.2633	6.0292e-07	1.135e-05		BGIOSGA035717	3.9173	2.21e-08	7.32e-07
BGIOSGA021685	-2.9026	2.9722e-15	1.3252e-13		BGIOSGA035719	6.2631	5.96e-07	1.58e-05
BGIOSGA021708	-2.4325	1.586e-27	1.3014e-25		BGIOSGA035721	2.5969	6.91e-07	1.82e-05
BGIOSGA021766	-3.9048	1.0517e-15	4.8467e-14		BGIOSGA035722	4.7224	1.39e-06	3.44e-05
BGIOSGA021767	-4.0023	1.258e-24	9.3142e-23		BGIOSGA035748	1.4156	5.72e-07	1.53e-05
BGIOSGA021769	3.8138	5.8042e-07	1.0941e-05		BGIOSGA035749	-1.0765	1.54e-08	5.19e-07
BGIOSGA021860	2.8941	1.1244e-05	0.00017001		BGIOSGA035766	1.1419	6.36e-11	2.92e-09
BGIOSGA021876	1.4367	3.0796e-08	7.0788e-07		BGIOSGA035781	1.0419	3.89e-05	0.00072387
BGIOSGA021922	-2.7994	7.2763e-21	4.4401e-19		BGIOSGA035805	2.1897	5.75e-22	6.31e-20
BGIOSGA021980	1.8659	7.1257e-05	0.00091419		BGIOSGA035815	1.4894	1.61e-05	0.00032401
BGIOSGA022000	-4.5536	9.8465e-30	9.0897e-28		BGIOSGA035818	2.5374	3.59e-14	2.26e-12
BGIOSGA022008	-1.4642	4.072e-23	2.8125e-21		BGIOSGA035845	2.1367	1.58e-39	3.91e-37
BGIOSGA022017	-2.9017	9.5205e-07	1.7454e-05		BGIOSGA035913	-1.02	5.69e-16	4.05e-14
BGIOSGA022125	-1.1172	0.00032845	0.0035591		BGIOSGA035923	-1.0982	2.77e-11	1.32e-09
BGIOSGA022162	-2.229	9.4025e-09	2.2873e-07		BGIOSGA035933	-1.69	1.74e-11	8.54e-10
BGIOSGA022219	-5.4716	3.1695e-82	1.3625e-79		BGIOSGA036047	-1.0481	1.67e-05	0.00033611
BGIOSGA022242	-3.3297	3.1507e-05	0.00043565		BGIOSGA036091	1.0266	1.17e-07	3.49e-06
BGIOSGA022243	-2.7178	1.5337e-20	9.222e-19		BGIOSGA036115	-4.6686	2.24e-10	9.86e-09
BGIOSGA022244	4.1599	3.6949e-20	2.1719e-18		BGIOSGA036143	-1.1914	8.41e-06	0.0001792
BGIOSGA022269	-1.8977	0.00024506	0.0027646		BGIOSGA036214	3.3199	6.99e-17	5.3e-15
BGIOSGA022272	1.7644	2.8794e-16	1.3731e-14		BGIOSGA036271	2.0879	3.17e-33	6.19e-31
BGIOSGA022278	-1.5895	9.9597e-05	0.0012359		BGIOSGA036403	-1.6571	6.13e-05	0.0010916
BGIOSGA022298	-3.1385	9.1827e-09	2.2376e-07		BGIOSGA036440	-1.231	5.03e-06	0.00011199
BGIOSGA022302	-5.6675	1.729e-07	3.5218e-06		BGIOSGA036477	2.9959	1.64e-06	4e-05
BGIOSGA022334	-1.2638	0.00011802	0.0014446		BGIOSGA036501	1.108	2.33e-09	8.93e-08
BGIOSGA022355	-4.8165	7.0154e-11	2.1541e-09		BGIOSGA036516	-3.0423	3.4e-48	1.04e-45
BGIOSGA022375	-2.1035	1.0023e-08	2.4301e-07		BGIOSGA036550	-2.4958	7.05e-22	7.68e-20
BGIOSGA022381	-1.906	7.2589e-10	2.0064e-08		BGIOSGA036589	-1.7995	1.98e-05	0.00039069
BGIOSGA022384	-1.3792	0.00034409	0.0037118		BGIOSGA036593	-1.4147	4.86e-09	1.77e-07
BGIOSGA022398	-1.3129	0.00026054	0.0029222		BGIOSGA036628	-3.6898	3.92e-37	8.85e-35
BGIOSGA022424	-1.6946	8.4403e-10	2.3086e-08		BGIOSGA036640	1.3762	1.05e-15	7.36e-14
BGIOSGA022428	-3.252	0.0004215	0.0044599		BGIOSGA036641	2.3069	5.01e-14	3.09e-12
BGIOSGA022460	-1.7077	4.1193e-06	6.7797e-05		BGIOSGA036773	1.0494	1.61e-08	5.41e-07
BGIOSGA022502	-2.6965	5.7964e-26	4.4758e-24		BGIOSGA036832	-2.4356	4.38e-17	3.38e-15
BGIOSGA022523	1.1772	0.00040186	0.0042714		BGIOSGA036833	-1.3917	0.00027037	0.0040551
BGIOSGA022531	-2.8487	2.2152e-09	5.748e-08		BGIOSGA036858	1.6746	2.64e-14	1.69e-12
BGIOSGA022534	-3.9376	6.498e-06	0.00010334		BGIOSGA036874	2.475	1.58e-07	4.6e-06
BGIOSGA022549	-1.7548	1.0691e-07	2.233e-06		BGIOSGA036880	3.1246	3.98e-192	1.63e-188
BGIOSGA022551	-2.7977	3.4219e-32	3.5709e-30		BGIOSGA037101	-2.9279	1.64e-29	2.6e-27
BGIOSGA022562	-2.5271	6.0845e-08	1.3266e-06		BGIOSGA037112	4.3216	1.51e-91	1.49e-88
BGIOSGA022582	-1.4123	5.0445e-10	1.4314e-08		BGIOSGA037174	1.794	7.46e-06	0.00016092
BGIOSGA022607	-3.3973	4.214e-24	2.9895e-22		BGIOSGA037179	2.9488	6.66e-08	2.06e-06
BGIOSGA022608	-4.8051	2.596e-109	1.8693e-106		BGIOSGA037181	1.8873	2.54e-08	8.28e-07
BGIOSGA022627	-4.5225	1.2058e-63	3.3394e-61		BGIOSGA037252	-1.2991	0.00019768	0.0030793
BGIOSGA022640	-1.7599	4.5126e-07	8.6822e-06		BGIOSGA037304	2.2263	1.48e-10	6.64e-09
BGIOSGA022642	-1.2258	6.3121e-06	0.00010055		BGIOSGA037315	-2.1495	5.96e-06	0.00013079
BGIOSGA022659	3.1273	4.2108e-15	1.863e-13		BGIOSGA037323	2.2369	3.41e-06	7.84e-05
BGIOSGA022703	-1.693	2.2226e-08	5.2045e-07		BGIOSGA037333	3.182	1.91e-13	1.11e-11
BGIOSGA022812	-1.3341	0.00030769	0.0033671		BGIOSGA037385	-4.4282	1.05e-06	2.67e-05
BGIOSGA022836	1.4386	1.3441e-51	2.7072e-49		BGIOSGA037466	1.5946	0.00031021	0.0045759
BGIOSGA022872	-4.4053	0.00045735	0.0047813		BGIOSGA037524	1.1755	3.21e-05	0.00061061
BGIOSGA022873	-4.7305	2.1142e-09	5.5056e-08		BGIOSGA037531	3.2907	2.74e-19	2.47e-17
BGIOSGA022876	1.2415	1.0096e-05	0.00015467		BGIOSGA037569	1.8775	1.53e-22	1.72e-20
BGIOSGA022900	-1.7444	6.2649e-30	5.8207e-28		BGIOSGA037573	2.4529	4.29e-08	1.36e-06
BGIOSGA022985	-2.0217	1.2178e-07	2.5325e-06		BGIOSGA037574	2.5056	8.77e-06	0.00018644
BGIOSGA023017	-1.0242	0.00047784	0.0049613		BGIOSGA037610	1.238	1.22e-17	9.82e-16
BGIOSGA023021	1.9979	2.7027e-06	4.5844e-05		BGIOSGA037620	1.4117	5.31e-10	2.22e-08
BGIOSGA023032	2.1798	9.0607e-22	5.8513e-20		BGIOSGA037630	1.6792	4.24e-24	5.2e-22
BGIOSGA023082	-1.5087	6.9432e-08	1.4989e-06		BGIOSGA037633	-2.2194	1.01e-51	3.53e-49
BGIOSGA023104	-1.1774	1.9193e-06	3.3342e-05		BGIOSGA037638	1.7121	2.33e-05	0.00045303
BGIOSGA023108	3.5179	0.00044652	0.0046834		BGIOSGA037853	-2.6187	2.05e-09	7.89e-08
BGIOSGA023120	4.3791	2.1456e-06	3.6979e-05		BGIOSGA037854	-1.0014	7.79e-164	2.23e-160
BGIOSGA023124	1.1056	4.0817e-16	1.9272e-14		BGIOSGA037907	-1.5017	9.43e-08	2.85e-06
BGIOSGA023210	-1.664	5.7185e-05	0.00075105		BGIOSGA037984	1.9004	7.53e-05	0.001304
BGIOSGA023222	-2.0203	3.0248e-22	1.9982e-20		BGIOSGA038054	3.5654	4.55e-08	1.44e-06
BGIOSGA023279	-5.8936	2.5537e-14	1.0569e-12		BGIOSGA038064	-3.6055	3.81e-06	8.66e-05
BGIOSGA023291	2.6625	5.47e-05	0.00072033		BGIOSGA038159	1.344	2.09e-13	1.21e-11
BGIOSGA023315	1.0274	8.1696e-36	9.8453e-34		BGIOSGA038333	-2.9657	0.00020681	0.0032059
BGIOSGA023323	-5.0728	1.3805e-12	4.9888e-11		BGIOSGA040088	2.0559	3.43e-05	0.00064853
BGIOSGA023353	1.1627	6.0497e-21	3.7152e-19		BGIOSGA040489	-2.1516	9.35e-10	3.77e-08
BGIOSGA023362	1.0003	9.1638e-13	3.3452e-11		BGIOSGA040512	1.1359	3e-06	6.98e-05
BGIOSGA023363	-1.7135	3.4052e-11	1.0813e-09		BGIOSGA040533	4.2682	2.68e-05	0.00051523
BGIOSGA023376	-1.7061	0.00020859	0.0023954		BGIOSGA040548	-5.4075	2.57e-06	6.09e-05
BGIOSGA023429	-1.5996	4.8533e-06	7.8885e-05		BGIOSGA040600	2.7326	2.85e-12	1.51e-10
BGIOSGA023458	1.2891	2.266e-05	0.0003215		BGIOSGA040604	-2.7853	2.75e-07	7.71e-06
BGIOSGA023470	1.0554	0.0004019	0.0042714		BGIOSGA040642	-3.961	7.22e-82	5.74e-79
BGIOSGA023482	-3.2156	1.4695e-69	4.6511e-67		Novel00024	1.5539	7.2e-17	5.44e-15
BGIOSGA023499	2.1708	2.0667e-05	0.00029599		Novel00060	1.129	2.83e-05	0.00054264
BGIOSGA023514	-2.0002	1.1483e-09	3.0766e-08		Novel00079	-3.8921	1.84e-07	5.32e-06
BGIOSGA023530	2.0045	1.487e-40	2.0994e-38		Novel00241	3.9853	2.08e-10	9.16e-09
BGIOSGA023552	1.4309	2.8125e-06	4.7622e-05		Novel00259	-1.2033	0.00021007	0.0032476
BGIOSGA023579	-1.3575	1.7578e-09	4.632e-08		Novel00282	-1.9462	2.86e-11	1.36e-09
BGIOSGA023591	1.2799	7.0681e-05	0.0009076		Novel00336	-1.9151	2.5e-06	5.94e-05
BGIOSGA023594	1.0486	4.6449e-06	7.5669e-05		Novel00368	-3.6387	7.68e-05	0.0013254
BGIOSGA023606	-1.7657	1.1384e-07	2.376e-06		Novel00375	-1.2078	2.27e-120	3.42e-117
BGIOSGA023617	-2.9364	2.1065e-21	1.3394e-19		Novel00387	1.8211	0.00016729	0.0026625
BGIOSGA023624	1.4233	3.625e-11	1.1473e-09		Novel00398	2.6051	1.87e-10	8.29e-09
BGIOSGA023626	2.764	2.3499e-05	0.0003321		Novel00403	-1.6305	5.4e-05	0.00097389
BGIOSGA023631	-3.6175	1.4513e-05	0.00021447		Novel00488	-1.115	3.66e-77	2.39e-74
BGIOSGA023647	-1.9368	2.2791e-06	3.912e-05		Novel00605	-2.8017	1.5e-07	4.38e-06
BGIOSGA023660	-2.1283	7.7436e-13	2.8412e-11		Novel00606	1.6327	6.78e-09	2.44e-07
BGIOSGA023664	3.546	4.2299e-06	6.9498e-05		Novel00614	2.3987	1.26e-05	0.0002611
BGIOSGA023694	-1.8242	7.0162e-60	1.7125e-57		Novel00647	-1.1278	6.89e-13	3.85e-11
BGIOSGA023704	-4.3797	1.0981e-44	1.7377e-42		Novel00652	-1.7266	1.34e-13	7.96e-12
BGIOSGA023739	-1.9664	2.4181e-60	6.0039e-58		Novel00713	-2.7579	9.29e-05	0.0015787
BGIOSGA023753	1.4081	0.00034173	0.0036891		Novel00756	-4.4442	2.18e-15	1.49e-13
BGIOSGA023812	-2.1803	1.361e-05	0.00020255		Novel00975	2.5053	0.0001627	0.0026082
BGIOSGA023856	1.0075	1.2466e-13	4.9253e-12		Novel01003	-2.3223	6.1e-10	2.53e-08
BGIOSGA023903	-1.12	7.4412e-05	0.00095127		Novel01095	-4.093	5.37e-50	1.77e-47
BGIOSGA023979	-3.2038	4.2264e-32	4.3945e-30		Novel01249	-2.9399	2.11e-05	0.00041517
BGIOSGA023992	-3.4009	5.6167e-05	0.00073834		Novel01283	-1.1302	1.39e-07	4.08e-06
BGIOSGA023995	-2.0546	0.00010416	0.0012881		Novel01306	3.2234	7.61e-07	1.99e-05
BGIOSGA024059	-2.7742	3.7221e-218	8.9337e-215		Novel01348	-7.3685	3.22e-11	1.52e-09
BGIOSGA024062	-2.3362	2.319e-36	2.8789e-34		Novel01523	1.8695	5.09e-05	0.00092543
BGIOSGA024079	1.2437	6.9912e-09	1.721e-07		Novel01524	2.0495	3.8e-15	2.55e-13
BGIOSGA024088	-2.4422	1.5317e-10	4.5339e-09		Novel01536	1.3741	4.03e-05	0.00074643
BGIOSGA024093	-1.1836	2.0348e-22	1.3566e-20		Novel01537	-3.1309	1.27e-05	0.00026292
BGIOSGA024103	-2.0722	1.0931e-51	2.233e-49		Novel01608	-3.5952	1.31e-09	5.18e-08
BGIOSGA024113	-1.2923	1.9616e-11	6.3986e-10		Novel01654	-2.1553	0.00031548	0.0046466
BGIOSGA024117	-2.9637	1.9922e-08	4.6956e-07		Novel01675	-1.9221	8.23e-05	0.0014128
BGIOSGA024119	2.0816	0.00041479	0.0043955		Novel01728	-1.1063	3.66e-38	8.66e-36
BGIOSGA024123	-3.9279	8.5923e-70	2.8122e-67		Novel01731	-4.3835	5.32e-05	0.00096201
BGIOSGA024167	3.4457	1.0861e-64	3.0973e-62		Novel01744	-3.0121	5.84e-06	0.00012869
BGIOSGA024200	-1.5142	2.85e-05	0.00039713		Novel01772	-1.213	2.94e-11	1.39e-09
BGIOSGA024225	-1.4078	0.00011867	0.0014501		Novel01773	-1.5019	1.91e-07	5.47e-06
BGIOSGA024236	1.5923	0.00020883	0.0023972		Novel01792	-5.143	4.69e-13	2.65e-11
BGIOSGA024257	-2.1138	5.6642e-05	0.00074425		Novel01794	3.7853	0.00018473	0.0029108
BGIOSGA024325	2.3574	7.4456e-16	3.4533e-14		Novel01808	-5.1058	7.87e-07	2.05e-05
BGIOSGA024381	-1.7152	3.3381e-05	0.0004598
BGIOSGA024382	-1.6128	9.4357e-12	3.1785e-10
BGIOSGA024385	-1.0953	0.0004479	0.0046962
BGIOSGA024403	1.3854	9.163e-83	3.9987e-80
BGIOSGA024414	-5.5455	2.6322e-08	6.0796e-07
BGIOSGA024440	-1.0662	4.6784e-15	2.0572e-13
BGIOSGA024535	1.1529	0.00023744	0.0026881
BGIOSGA024616	1.0907	1.1672e-05	0.00017588
BGIOSGA024622	4.2895	6.4792e-17	3.2064e-15
BGIOSGA024671	-2.0391	1.8086e-15	8.1903e-14
BGIOSGA024701	-1.5368	1.4687e-25	1.1191e-23
BGIOSGA024730	-1.4752	1.8446e-24	1.3484e-22
BGIOSGA024735	-2.8909	1.2052e-11	3.9946e-10
BGIOSGA024748	-2.1011	0.00014919	0.001783
BGIOSGA024763	2.0297	0.00046213	0.0048246
BGIOSGA024765	-2.8141	1.9623e-07	3.9606e-06
BGIOSGA024775	-2.1973	1.0983e-05	0.00016669
BGIOSGA024807	-3.1811	2.1791e-11	7.0838e-10
BGIOSGA024825	2.1343	5.5704e-06	8.9831e-05
BGIOSGA024835	-2.9125	1.425e-06	2.5305e-05
BGIOSGA024842	-4.1546	1.2259e-09	3.2753e-08
BGIOSGA024843	-3.1301	7.791e-05	0.00099159
BGIOSGA024866	1.6727	2.1607e-14	9.006e-13
BGIOSGA024867	1.2433	1.9655e-05	0.0002825
BGIOSGA024897	-1.9115	2.9519e-05	0.00041053
BGIOSGA025003	-2.283	4.7734e-05	0.00063827
BGIOSGA025004	-5.6087	5.0493e-21	3.1342e-19
BGIOSGA025039	-1.1775	3.9041e-18	2.0519e-16
BGIOSGA025076	-1.4676	5.1348e-08	1.135e-06
BGIOSGA025077	5.4797	2.0901e-07	4.202e-06
BGIOSGA025094	3.4466	0.00016555	0.0019502
BGIOSGA025158	1.9304	1.7421e-07	3.5436e-06
BGIOSGA025169	-4.8438	3.0722e-35	3.6265e-33
BGIOSGA025203	-3.0207	9.4653e-38	1.2336e-35
BGIOSGA025204	-3.1387	1.3889e-117	1.2122e-114
BGIOSGA025211	1.1668	1.9969e-08	4.7026e-07
BGIOSGA025219	-3.0786	2.3223e-05	0.00032885
BGIOSGA025234	-1.5873	3.4805e-08	7.9371e-07
BGIOSGA025242	-1.0972	8.5199e-08	1.815e-06
BGIOSGA025243	2.5405	9.6891e-06	0.00014899
BGIOSGA025264	1.2605	7.2152e-07	1.3416e-05
BGIOSGA025321	-2.7761	8.6297e-97	5.1782e-94
BGIOSGA025334	5.0253	5.7769e-05	0.00075665
BGIOSGA025410	-2.5947	2.7693e-22	1.8345e-20
BGIOSGA025423	3.1523	0.00023338	0.0026463
BGIOSGA025495	-1.8027	9.9001e-12	3.3233e-10
BGIOSGA025508	-1.9777	1.9528e-18	1.0358e-16
BGIOSGA025531	1.7741	1.7719e-44	2.7587e-42
BGIOSGA025609	-3.5657	1.2366e-35	1.484e-33
BGIOSGA025669	-2.28	4.2307e-08	9.5273e-07
BGIOSGA025694	3.3876	9.8497e-32	9.9541e-30
BGIOSGA025711	-6.1246	6.6636e-32	6.8059e-30
BGIOSGA025727	-1.3297	6.7035e-10	1.8654e-08
BGIOSGA025849	3.1707	3.05e-05	0.00042274
BGIOSGA025853	-2.1175	6.3797e-28	5.3728e-26
BGIOSGA025854	-5.1058	1.601e-07	3.2773e-06
BGIOSGA025873	-2.2465	4.3836e-09	1.1056e-07
BGIOSGA025874	-2.2764	0.00046502	0.004851
BGIOSGA025877	-2.6011	8.8683e-06	0.00013755
BGIOSGA025878	-2.1139	1.9903e-09	5.2114e-08
BGIOSGA025902	-3.6994	4.3038e-141	5.3895e-138
BGIOSGA025915	-1.0913	4.2376e-05	0.0005722
BGIOSGA025925	-3.1164	7.2666e-08	1.5607e-06
BGIOSGA025949	1.3309	7.6334e-06	0.00011994
BGIOSGA025958	-4.1412	5.589e-29	5.0462e-27
BGIOSGA025973	-1.8858	6.7322e-06	0.00010689
BGIOSGA025989	-1.8859	1.9943e-45	3.2452e-43
BGIOSGA026014	-2.1243	0.00015928	0.0018871
BGIOSGA026022	-3.4957	1.7086e-180	3.0758e-177
BGIOSGA026025	-2.4214	8.762e-31	8.5258e-29
BGIOSGA026032	-1.3404	1.8808e-15	8.4909e-14
BGIOSGA026040	-2.1745	1.2192e-06	2.1948e-05
BGIOSGA026049	-1.4371	0.00010767	0.001327
BGIOSGA026092	-2.0269	5.5794e-06	8.9877e-05
BGIOSGA026093	-10.621	2.2993e-07	4.6052e-06
BGIOSGA026094	-4.0455	1.6761e-19	9.4288e-18
BGIOSGA026104	-1.126	7.2385e-07	1.3451e-05
BGIOSGA026129	-2.0837	8.0496e-15	3.4707e-13
BGIOSGA026164	-2.2646	5.4102e-70	1.7912e-67
BGIOSGA026212	-4.8295	1.7242e-231	4.5147e-228
BGIOSGA026219	-1.4867	4.6704e-08	1.0395e-06
BGIOSGA026224	1.6784	1.3785e-21	8.8037e-20
BGIOSGA026226	-1.3361	6.9603e-06	0.00011015
BGIOSGA026235	2.005	6.5757e-07	1.229e-05
BGIOSGA026248	-1.5982	3.3754e-07	6.6225e-06
BGIOSGA026253	-3.6233	0.00010887	0.0013397
BGIOSGA026304	3.0391	1.8183e-05	0.0002633
BGIOSGA026337	2.0832	4.3274e-09	1.0933e-07
BGIOSGA026374	-1.0402	0.0002155	0.002465
BGIOSGA026375	1.6142	2.2098e-20	1.3123e-18
BGIOSGA026387	2.1265	2.4148e-88	1.1992e-85
BGIOSGA026388	4.7124	1.3833e-06	2.4593e-05
BGIOSGA026389	4.6493	1.5733e-32	1.6783e-30
BGIOSGA026390	4.247	1.6961e-58	3.9396e-56
BGIOSGA026398	-2.1717	1.3773e-29	1.2674e-27
BGIOSGA026401	-1.8837	1.9337e-09	5.0769e-08
BGIOSGA026405	1.3076	1.8872e-06	3.2862e-05
BGIOSGA026430	-2.6718	2.7838e-15	1.245e-13
BGIOSGA026442	1.018	0.00025758	0.0028912
BGIOSGA026476	-1.8898	9.4045e-06	0.00014493
BGIOSGA026494	-2.4914	6.0382e-08	1.3175e-06
BGIOSGA026527	-1.6625	1.0265e-07	2.1485e-06
BGIOSGA026530	7.8296	2.4091e-08	5.6048e-07
BGIOSGA026537	-3.5778	6.9968e-19	3.788e-17
BGIOSGA026547	-1.959	7.002e-05	0.00089991
BGIOSGA026567	-3.5037	4.6219e-51	9.0558e-49
BGIOSGA026603	-1.8019	6.0901e-06	9.7287e-05
BGIOSGA026625	1.7009	0.00018936	0.0022045
BGIOSGA026627	-1.9068	3.5532e-24	2.5394e-22
BGIOSGA026629	-1.2116	4.5372e-09	1.1403e-07
BGIOSGA026643	1.2865	9.3251e-12	3.145e-10
BGIOSGA026654	-3.2426	1.5097e-05	0.00022163
BGIOSGA026677	1.3547	4.7781e-06	7.7751e-05
BGIOSGA026697	-1.2428	7.9168e-07	1.4673e-05
BGIOSGA026706	1.0809	8.8493e-05	0.0011115
BGIOSGA026737	-1.828	3.8392e-06	6.3395e-05
BGIOSGA026749	-2.474	3.253e-26	2.5391e-24
BGIOSGA026750	-1.2966	4.9842e-05	0.00066234
BGIOSGA026785	-2.045	7.302e-120	6.5723e-117
BGIOSGA026786	-3.9185	9.7209e-64	2.7183e-61
BGIOSGA026796	-1.3938	6.8451e-51	1.3321e-48
BGIOSGA026800	-2.3955	1.2277e-49	2.2813e-47
BGIOSGA026808	-3.9687	2.1389e-08	5.0207e-07
BGIOSGA026849	-3.8069	2.6147e-105	1.7931e-102
BGIOSGA026879	-2.9149	1.7607e-05	0.0002556
BGIOSGA026897	-1.3248	1.7696e-07	3.5873e-06
BGIOSGA026905	-2.4506	2.4266e-13	9.3436e-12
BGIOSGA026977	-2.159	0.00022649	0.0025773
BGIOSGA026994	1.4537	1.1339e-06	2.0578e-05
BGIOSGA027012	-2.9665	2.6248e-11	8.4092e-10
BGIOSGA027020	-1.8699	0.00021821	0.00249
BGIOSGA027045	-2.1399	1.0328e-15	4.7669e-14
BGIOSGA027060	-3.681	4.0824e-34	4.666e-32
BGIOSGA027085	3.5158	5.6312e-06	9.0659e-05
BGIOSGA027198	1.2215	6.7087e-40	9.2452e-38
BGIOSGA027318	1.9097	1.496e-05	0.00021995
BGIOSGA027333	-2.468	0.00014065	0.0016936
BGIOSGA027346	-1.7826	1.4532e-05	0.00021464
BGIOSGA027355	-1.2181	0.00010754	0.0013259
BGIOSGA027391	4.7443	5.7431e-06	9.2204e-05
BGIOSGA027394	1.7509	4.6721e-09	1.1722e-07
BGIOSGA027404	-2.7694	1.2884e-15	5.8994e-14
BGIOSGA027464	1.6727	7.0872e-11	2.1739e-09
BGIOSGA027488	1.8617	0.00035738	0.0038393
BGIOSGA027576	-3.8468	0.0004318	0.0045473
BGIOSGA027623	-1.002	1.9346e-06	3.3567e-05
BGIOSGA027635	1.0848	1.1031e-15	5.0674e-14
BGIOSGA027641	-3.3941	7.5456e-06	0.00011876
BGIOSGA027642	2.4744	0.00036669	0.0039218
BGIOSGA027705	1.211	1.2611e-07	2.6206e-06
BGIOSGA027715	-2.1803	3.175e-12	1.1165e-10
BGIOSGA027772	-1.7858	1.7536e-06	3.0703e-05
BGIOSGA027773	-2.0069	1.3498e-05	0.00020122
BGIOSGA027778	-2.5094	4.3755e-07	8.441e-06
BGIOSGA027782	-3.8661	5.4106e-70	1.7912e-67
BGIOSGA027813	1.1645	0.00015254	0.0018196
BGIOSGA027860	-3.602	7.0264e-14	2.8225e-12
BGIOSGA027863	-1.6812	3.0435e-07	5.9918e-06
BGIOSGA027872	-1.3096	0.00014531	0.0017423
BGIOSGA027880	3.3613	4.2907e-19	2.3629e-17
BGIOSGA027915	-2.2411	2.1186e-21	1.344e-19
BGIOSGA027959	-5.3334	1.4742e-57	3.3434e-55
BGIOSGA027960	-4.6319	1.0789e-27	8.9296e-26
BGIOSGA027961	-3.6282	2.2024e-05	0.00031356
BGIOSGA027972	-3.3357	1.1054e-06	2.0086e-05
BGIOSGA028019	-2.4606	4.5141e-33	4.9624e-31
BGIOSGA028020	-2.2724	0.00027793	0.0030907
BGIOSGA028054	1.4012	7.6973e-15	3.3238e-13
BGIOSGA028161	-2.0856	2.5474e-06	4.3363e-05
BGIOSGA028181	-3.438	2.3173e-27	1.8748e-25
BGIOSGA028188	2.3394	0.00026335	0.0029502
BGIOSGA028217	-1.7108	5.3088e-08	1.1717e-06
BGIOSGA028253	-2.9482	4.2774e-15	1.8895e-13
BGIOSGA028273	-2.2822	1.0492e-39	1.4322e-37
BGIOSGA028310	-2.0281	3.2406e-13	1.233e-11
BGIOSGA028355	-3.0613	4.868e-14	1.9748e-12
BGIOSGA028368	1.2341	0.00023784	0.0026916
BGIOSGA028468	-1.6201	5.5007e-10	1.5517e-08
BGIOSGA028543	-2.6769	4.8218e-20	2.8113e-18
BGIOSGA028549	-2.8981	2.5883e-11	8.3201e-10
BGIOSGA028580	1.7387	4.3476e-06	7.1229e-05
BGIOSGA028621	1.1123	3.1307e-12	1.1023e-10
BGIOSGA028631	-3.1978	5.2178e-74	1.8786e-71
BGIOSGA028649	-1.4361	2.3961e-05	0.0003383
BGIOSGA028653	-2.1656	7.6387e-28	6.3956e-26
BGIOSGA028658	-1.4055	5.6313e-07	1.065e-05
BGIOSGA028663	-2.7122	7.9022e-09	1.9403e-07
BGIOSGA028686	1.3168	2.607e-06	4.4324e-05
BGIOSGA028700	2.1818	1.6192e-13	6.3449e-12
BGIOSGA028703	-1.7227	0.00020236	0.002336
BGIOSGA028755	-4.7721	9.5346e-08	2.0177e-06
BGIOSGA028759	-4.0259	9.717e-45	1.5548e-42
BGIOSGA028777	-1.9728	3.1934e-06	5.3631e-05
BGIOSGA028779	-1.7271	1.9989e-07	4.0288e-06
BGIOSGA028838	-4.1869	1.537e-268	5.5334e-265
BGIOSGA028888	-1.177	2.2065e-08	5.1733e-07
BGIOSGA028889	-1.7585	2.3817e-19	1.332e-17
BGIOSGA028891	1.3301	2.0497e-14	8.5808e-13
BGIOSGA028901	-1.6053	2.6496e-05	0.00037172
BGIOSGA028940	-1.9126	2.0778e-11	6.762e-10
BGIOSGA028948	1.9806	1.3861e-14	5.8625e-13
BGIOSGA028955	-2.1089	8.2857e-67	2.4603e-64
BGIOSGA028958	1.2698	6.6297e-10	1.8467e-08
BGIOSGA028998	1.2542	0.00021145	0.0024235
BGIOSGA029006	-2.0025	4.2591e-07	8.2385e-06
BGIOSGA029015	-3.7004	5.5376e-74	1.9691e-71
BGIOSGA029025	1.3635	4.4894e-19	2.4676e-17
BGIOSGA029074	-3.0843	2.54e-05	0.0003573
BGIOSGA029075	-2.4711	3.9384e-09	1.0003e-07
BGIOSGA029097	-2.2796	9.3872e-06	0.00014482
BGIOSGA029122	1.2267	2.3367e-06	4.0084e-05
BGIOSGA029174	1.0656	2.9364e-07	5.7888e-06
BGIOSGA029182	-1.4795	2.5417e-25	1.9265e-23
BGIOSGA029184	-3.12	8.832e-104	5.9158e-101
BGIOSGA029226	-2.1534	1.442e-05	0.00021332
BGIOSGA029234	-3.0259	1.3849e-24	1.0228e-22
BGIOSGA029255	-3.5628	2.7121e-133	2.6936e-130
BGIOSGA029256	-2.7942	4.6269e-19	2.5383e-17
BGIOSGA029257	-3.7279	0.00020184	0.002331
BGIOSGA029283	-1.569	1.6236e-06	2.8619e-05
BGIOSGA029284	-1.9965	2.9809e-10	8.5943e-09
BGIOSGA029294	-2.2356	3.6977e-11	1.1678e-09
BGIOSGA029302	-1.5098	8.2812e-12	2.8094e-10
BGIOSGA029338	-3.0635	0.00019863	0.0023004
BGIOSGA029341	3.31	9.5761e-08	2.0251e-06
BGIOSGA029354	6.8776	0.00018683	0.0021777
BGIOSGA029367	-1.2121	4.9118e-06	7.9745e-05
BGIOSGA029369	-1.5456	1.2918e-06	2.3152e-05
BGIOSGA029374	1.0662	6.0564e-12	2.0791e-10
BGIOSGA029376	-2.9944	8.2129e-09	2.0098e-07
BGIOSGA029396	-1.4396	9.7388e-11	2.9495e-09
BGIOSGA029403	-1.6896	4.2393e-17	2.1272e-15
BGIOSGA029410	1.1062	6.8844e-06	0.00010913
BGIOSGA029415	-2.4157	1.5583e-32	1.6684e-30
BGIOSGA029416	-3.5556	1.9394e-20	1.1541e-18
BGIOSGA029417	-4.0826	2.8931e-36	3.5763e-34
BGIOSGA029453	-2.2568	3.1041e-11	9.9009e-10
BGIOSGA029473	2.2822	1.4294e-06	2.5366e-05
BGIOSGA029486	-1.4663	3.3356e-08	7.6308e-07
BGIOSGA029493	1.3685	5.4306e-05	0.00071584
BGIOSGA029506	1.6661	1.0662e-22	7.1917e-21
BGIOSGA029581	-1.7321	2.0603e-06	3.5534e-05
BGIOSGA029583	1.3433	2.6873e-05	0.00037646
BGIOSGA029591	-2.1051	5.7838e-10	1.6236e-08
BGIOSGA029604	-1.6662	0.00033062	0.0035772
BGIOSGA029609	-1.785	2.7212e-05	0.00038083
BGIOSGA029613	1.3648	1.1954e-05	0.00017933
BGIOSGA029629	2.3023	2.9647e-15	1.3239e-13
BGIOSGA029642	-1.5324	0.00012455	0.0015143
BGIOSGA029649	-1.4748	8.8693e-10	2.4191e-08
BGIOSGA029652	-3.32	1.3707e-25	1.0472e-23
BGIOSGA029673	1.2637	0.00036366	0.0038952
BGIOSGA029680	-2.2561	1.4957e-07	3.0726e-06
BGIOSGA029692	-4.6379	0.00040997	0.0043508
BGIOSGA029726	1.6757	9.2613e-11	2.8108e-09
BGIOSGA029737	1.371	2.0692e-09	5.4082e-08
BGIOSGA029738	1.2834	1.1196e-37	1.446e-35
BGIOSGA029756	1.2636	0.00017083	0.0020074
BGIOSGA029757	-2.4512	8.2771e-10	2.2661e-08
BGIOSGA029759	-1.4667	0.00032133	0.0034924
BGIOSGA029767	-1.1836	1.2097e-07	2.5175e-06
BGIOSGA029771	1.7945	3.6448e-05	0.00049634
BGIOSGA029796	-1.196	1.5841e-11	5.1964e-10
BGIOSGA029797	-3.0603	1.2168e-06	2.1932e-05
BGIOSGA029798	1.78	0.0004604	0.0048097
BGIOSGA029799	1.4709	2.2805e-05	0.0003234
BGIOSGA029804	1.4103	0.00014649	0.0017536
BGIOSGA029809	-1.8992	3.3877e-06	5.6597e-05
BGIOSGA029810	-2.4945	4.3807e-08	9.8113e-07
BGIOSGA029832	-3.4969	4.9234e-14	1.9944e-12
BGIOSGA029852	-1.5519	1.1561e-21	7.4163e-20
BGIOSGA029860	1.173	4.7264e-11	1.4829e-09
BGIOSGA029891	-4.2434	1.2038e-06	2.1723e-05
BGIOSGA029896	-1.2349	2.1069e-05	0.00030119
BGIOSGA029907	1.0566	7.3029e-06	0.00011519
BGIOSGA029949	-4.567	9.3116e-06	0.0001438
BGIOSGA029951	-3.4189	6.4606e-06	0.00010286
BGIOSGA029962	-2.1037	2.9238e-10	8.4464e-09
BGIOSGA030012	1.3961	5.7573e-05	0.00075511
BGIOSGA030110	1.735	0.00018573	0.0021675
BGIOSGA030182	-1.9481	3.5035e-07	6.8598e-06
BGIOSGA030195	-1.0898	0.000144	0.0017288
BGIOSGA030223	-1.977	7.1119e-10	1.9696e-08
BGIOSGA030237	3.0972	6.8589e-08	1.4835e-06
BGIOSGA030245	-1.2301	8.2822e-06	0.00012922
BGIOSGA030292	5.8923	1.5354e-29	1.3995e-27
BGIOSGA030307	-3.3253	4.3424e-13	1.6328e-11
BGIOSGA030346	-3.5557	3.255e-05	0.00044971
BGIOSGA030354	1.4376	9.7686e-29	8.6571e-27
BGIOSGA030364	-2.2666	4.8425e-10	1.3755e-08
BGIOSGA030372	1.3349	1.7448e-06	3.0568e-05
BGIOSGA030408	1.4	0.00044188	0.0046398
BGIOSGA030409	3.753	5.5726e-14	2.2511e-12
BGIOSGA030607	-2.8609	7.5342e-05	0.00096188
BGIOSGA030626	-3.7442	1.3229e-182	2.5402e-179
BGIOSGA030631	-3.3716	8.5971e-07	1.5883e-05
BGIOSGA030660	-2.4263	1.2271e-10	3.6855e-09
BGIOSGA030674	1.2906	1.925e-06	3.342e-05
BGIOSGA030727	-3.7438	2.8779e-08	6.6365e-07
BGIOSGA030738	-2.4297	1.1756e-05	0.0001769
BGIOSGA030739	-2.5487	1.977e-16	9.5378e-15
BGIOSGA030741	-1.2334	1.0491e-11	3.5054e-10
BGIOSGA030789	1.1365	5.3951e-05	0.00071181
BGIOSGA030791	-2.7317	3.127e-41	4.4808e-39
BGIOSGA030831	-1.3263	0.00029552	0.0032574
BGIOSGA030854	-1.7733	3.7564e-09	9.5577e-08
BGIOSGA030864	1.04	1.4003e-08	3.3498e-07
BGIOSGA030883	1.6384	1.1676e-05	0.00017588
BGIOSGA030892	-3.522	0.00020172	0.0023305
BGIOSGA030895	-2.2154	0.00030857	0.0033754
BGIOSGA030896	-2.9525	2.3801e-11	7.6764e-10
BGIOSGA030902	-2.2125	7.1061e-11	2.1773e-09
BGIOSGA030907	-6.7716	2.1633e-31	2.171e-29
BGIOSGA030936	1.8787	2.768e-05	0.00038626
BGIOSGA030941	1.6648	4.1758e-05	0.00056465
BGIOSGA030945	-2.836	1.216e-22	8.1832e-21
BGIOSGA030958	-1.2481	8.3871e-05	0.0010598
BGIOSGA030974	-2.7206	1.575e-06	2.7831e-05
BGIOSGA030985	-1.8671	5.7912e-06	9.2878e-05
BGIOSGA030989	-3.7237	7.385e-42	1.0797e-39
BGIOSGA030999	-2.5988	1.5587e-18	8.3134e-17
BGIOSGA031000	-2.8017	7.8139e-20	4.4832e-18
BGIOSGA031004	-2.2394	4.4436e-13	1.6622e-11
BGIOSGA031005	-2.0595	1.1505e-16	5.6166e-15
BGIOSGA031010	-1.6408	0.00047164	0.0049076
BGIOSGA031012	-1.8075	1.6628e-13	6.5073e-12
BGIOSGA031039	2.2454	0.00021915	0.0024998
BGIOSGA031040	1.1927	5.5635e-10	1.5664e-08
BGIOSGA031062	1.8437	1.5583e-08	3.7153e-07
BGIOSGA031075	-3.8628	1.4848e-37	1.8923e-35
BGIOSGA031076	-3.1186	4.844e-23	3.3219e-21
BGIOSGA031095	1.7637	9.7785e-07	1.7869e-05
BGIOSGA031099	-4.1181	4.3083e-08	9.6792e-07
BGIOSGA031103	-1.6724	2.0801e-12	7.4146e-11
BGIOSGA031105	-1.7113	3.9347e-06	6.4833e-05
BGIOSGA031183	-3.3105	5.4021e-26	4.1826e-24
BGIOSGA031184	-1.5452	1.5329e-13	6.0235e-12
BGIOSGA031185	-1.7167	3.2512e-06	5.4442e-05
BGIOSGA031243	-1.6324	9.6676e-07	1.769e-05
BGIOSGA031245	1.1155	3.8948e-06	6.4212e-05
BGIOSGA031250	1.0354	0.00044994	0.0047141
BGIOSGA031256	-3.0755	7.9065e-05	0.0010045
BGIOSGA031338	1.6159	5.619e-09	1.3964e-07
BGIOSGA031347	-1.2153	5.038e-09	1.2585e-07
BGIOSGA031390	-2.8548	1.5033e-10	4.459e-09
BGIOSGA031406	1.6046	0.00022228	0.0025345
BGIOSGA031427	4.1436	1.6202e-155	2.1212e-152
BGIOSGA031474	3.1859	4.3284e-08	9.7168e-07
BGIOSGA031490	-3.2714	1.6774e-06	2.9495e-05
BGIOSGA031515	-1.9459	3.3805e-15	1.5025e-13
BGIOSGA031518	-2.64	7.2055e-05	0.00092318
BGIOSGA031524	-1.2885	0.00037499	0.0040046
BGIOSGA031544	-1.3848	2.1071e-05	0.00030119
BGIOSGA031561	1.7625	1.493e-13	5.8747e-12
BGIOSGA031572	-3.1104	2.4099e-63	6.5482e-61
BGIOSGA031574	5.2779	0.00026312	0.0029488
BGIOSGA031606	-2.2494	2.8198e-25	2.1317e-23
BGIOSGA031635	1.7545	2.1439e-09	5.578e-08
BGIOSGA031671	-3.6957	8.3141e-24	5.8548e-22
BGIOSGA031679	-6.6338	9.7241e-05	0.0012101
BGIOSGA031688	-1.9466	2.957e-06	4.9776e-05
BGIOSGA031695	-1.6733	2.7303e-07	5.4009e-06
BGIOSGA031703	-1.4548	1.5678e-16	7.6274e-15
BGIOSGA031737	-5.5071	4.9458e-29	4.4795e-27
BGIOSGA031777	1.8473	0.00015467	0.0018393
BGIOSGA031783	-3.93	1.2997e-09	3.4661e-08
BGIOSGA031784	-3.0668	4.0012e-60	9.8498e-58
BGIOSGA031785	-3.2203	1.4555e-05	0.00021488
BGIOSGA031786	-3.9924	5.2624e-10	1.4903e-08
BGIOSGA031787	-4.8973	1.1219e-36	1.3989e-34
BGIOSGA031788	-4.474	9.4624e-307	5.4507e-303
BGIOSGA031790	-2.9358	1.5672e-07	3.2104e-06
BGIOSGA031793	-3.6606	8.8356e-107	6.2069e-104
BGIOSGA031796	-2.8749	0.00026477	0.0029627
BGIOSGA031797	-1.5018	5.1729e-10	1.4664e-08
BGIOSGA031798	-2.0807	4.2493e-68	1.316e-65
BGIOSGA031800	-1.95	0.00030922	0.0033786
BGIOSGA031801	-1.8826	1.5245e-06	2.6971e-05
BGIOSGA031806	9.2888	0.00015065	0.0017982
BGIOSGA031815	-3.1851	1.0434e-06	1.8984e-05
BGIOSGA031825	-1.946	7.0134e-23	4.7867e-21
BGIOSGA031826	-1.7562	1.5947e-06	2.8126e-05
BGIOSGA031846	-4.2567	1.0031e-05	0.00015384
BGIOSGA031896	1.1472	1.0954e-16	5.3565e-15
BGIOSGA031910	-2.5325	1.8823e-40	2.6317e-38
BGIOSGA031915	-3.8748	1.1771e-12	4.2807e-11
BGIOSGA031916	1.3772	0.00017833	0.0020888
BGIOSGA031936	1.3308	2.472e-05	0.00034816
BGIOSGA031944	-3.2261	3.5948e-09	9.1869e-08
BGIOSGA031952	-2.0941	7.1639e-08	1.5421e-06
BGIOSGA031973	-6.7218	1.4659e-05	0.00021618
BGIOSGA031997	-2.073	1.6639e-24	1.2257e-22
BGIOSGA032002	-3.0054	1.8302e-50	3.4681e-48
BGIOSGA032071	1.0127	4.1278e-08	9.3027e-07
BGIOSGA032080	-1.7943	1.7446e-09	4.6015e-08
BGIOSGA032104	-2.7585	3.7491e-09	9.5475e-08
BGIOSGA032182	-4.1654	1.7495e-15	7.9355e-14
BGIOSGA032186	-2.7761	0.00014553	0.0017443
BGIOSGA032257	-1.9658	4.1444e-10	1.1842e-08
BGIOSGA032288	-1.7594	1.3341e-05	0.00019899
BGIOSGA032373	1.064	0.00021124	0.0024221
BGIOSGA032385	-1.762	3.8522e-14	1.5693e-12
BGIOSGA032395	-2.8926	2.3527e-53	4.9461e-51
BGIOSGA032462	-2.0217	2.7308e-32	2.8916e-30
BGIOSGA032529	-1.2504	1.2831e-06	2.3011e-05
BGIOSGA032683	-2.6741	2.2662e-11	7.3419e-10
BGIOSGA032693	-1.3901	9.1588e-05	0.0011459
BGIOSGA032695	-4.1707	4.4372e-16	2.0848e-14
BGIOSGA032733	1.3747	1.6241e-14	6.849e-13
BGIOSGA032778	-3.0236	6.5216e-08	1.4155e-06
BGIOSGA032792	1.5261	3.6748e-30	3.4589e-28
BGIOSGA032814	2.6884	1.4671e-10	4.3561e-09
BGIOSGA032858	1.2754	9.0223e-06	0.00013978
BGIOSGA032869	-8.7639	9.9943e-08	2.0999e-06
BGIOSGA033025	-1.3032	4.4281e-15	1.9531e-13
BGIOSGA033034	-1.7667	6.7393e-05	0.00086886
BGIOSGA033066	-2.9766	3.2556e-08	7.4597e-07
BGIOSGA033067	-1.8134	5.7989e-76	2.1413e-73
BGIOSGA033070	-2.523	6.5587e-14	2.6457e-12
BGIOSGA033076	-1.1739	1.3025e-14	5.5168e-13
BGIOSGA033092	2.5776	6.593e-05	0.00085379
BGIOSGA033104	-1.7245	8.6104e-05	0.0010858
BGIOSGA033142	1.2	1.3956e-05	0.00020731
BGIOSGA033144	1.2345	2.4715e-07	4.9229e-06
BGIOSGA033178	-1.8811	3.1903e-09	8.1824e-08
BGIOSGA033188	-1.8853	4.366e-08	9.786e-07
BGIOSGA033209	-3.4111	9.4061e-30	8.7111e-28
BGIOSGA033216	-2.268	4.7392e-26	3.6892e-24
BGIOSGA033254	-1.3979	1.9137e-16	9.2482e-15
BGIOSGA033260	-3.1221	4.5193e-08	1.0106e-06
BGIOSGA033262	-1.278	9.9858e-39	1.3193e-36
BGIOSGA033275	-4.099	0.00027375	0.0030477
BGIOSGA033288	-3.8207	1.5114e-10	4.4785e-09
BGIOSGA033294	-2.8442	1.073e-14	4.5852e-13
BGIOSGA033296	-2.292	3.9199e-11	1.2353e-09
BGIOSGA033300	1.1119	1.2102e-06	2.1825e-05
BGIOSGA033314	-5.8473	8.0998e-18	4.1585e-16
BGIOSGA033316	-4.5558	3.0855e-16	1.4689e-14
BGIOSGA033328	-3.502	1.2731e-18	6.8027e-17
BGIOSGA033329	-1.8544	1.0821e-10	3.2635e-09
BGIOSGA033357	-1.3648	6.8222e-18	3.5301e-16
BGIOSGA033364	-2.1153	7.1354e-06	0.00011286
BGIOSGA033366	-7.2487	1.9698e-06	3.4115e-05
BGIOSGA033384	-1.6375	4.7436e-09	1.1881e-07
BGIOSGA033385	-2.3294	3.8384e-08	8.6914e-07
BGIOSGA033386	-2.3536	2.34e-05	0.00033087
BGIOSGA033387	-1.6347	6.4025e-10	1.7869e-08
BGIOSGA033393	-1.0483	3.8737e-05	0.00052578
BGIOSGA033397	6.7678	0.00030655	0.0033571
BGIOSGA033406	-2.0849	1.346e-06	2.4004e-05
BGIOSGA033423	-1.2277	3.209e-08	7.3588e-07
BGIOSGA033425	-2.4756	1.2479e-46	2.1018e-44
BGIOSGA033426	1.4454	7.1836e-36	8.73e-34
BGIOSGA033443	1.3408	3.5006e-06	5.8347e-05
BGIOSGA033455	-1.0508	1.3104e-06	2.3442e-05
BGIOSGA033476	2.6897	1.8931e-05	0.00027317
BGIOSGA033493	-3.4098	3.8e-24	2.71e-22
BGIOSGA033500	-1.8171	1.4587e-06	2.587e-05
BGIOSGA033519	-2.3259	2.5521e-08	5.9183e-07
BGIOSGA033522	-2.099	5.1152e-12	1.775e-10
BGIOSGA033527	4.168	1.0729e-06	1.9508e-05
BGIOSGA033532	-1.84	8.6867e-05	0.0010935
BGIOSGA033574	1.995	0.00022643	0.0025773
BGIOSGA033581	-2.1616	0.00020475	0.0023589
BGIOSGA033582	-3.2132	2.4247e-46	4.0135e-44
BGIOSGA033659	-2.2302	1.7571e-06	3.0747e-05
BGIOSGA033688	3.21	5.1615e-05	0.00068318
BGIOSGA033689	3.097	9.6911e-12	3.2608e-10
BGIOSGA033691	-1.5357	6.479e-05	0.00084057
BGIOSGA033715	-2.0476	1.1138e-10	3.3522e-09
BGIOSGA033774	-3.0813	2.2431e-06	3.8548e-05
BGIOSGA033833	2.3855	1.2251e-11	4.0558e-10
BGIOSGA033858	-2.3368	1.6377e-66	4.8132e-64
BGIOSGA033940	-4.3879	3.3318e-08	7.6281e-07
BGIOSGA033947	-4.4087	7.1676e-05	0.00091874
BGIOSGA033993	-4.0426	0.00046693	0.0048656
BGIOSGA034000	2.6409	7.3846e-10	2.0353e-08
BGIOSGA034012	-2.9226	6.0012e-11	1.8586e-09
BGIOSGA034037	2.69	6.7153e-05	0.00086675
BGIOSGA034166	1.9686	3.544e-06	5.8832e-05
BGIOSGA034194	-5.5844	1.7974e-28	1.5546e-26
BGIOSGA034207	2.6826	2.7765e-06	4.7041e-05
BGIOSGA034219	1.0811	0.00023411	0.0026525
BGIOSGA034249	1.6612	2.5841e-14	1.0663e-12
BGIOSGA034262	-1.9009	1.2761e-19	7.2207e-18
BGIOSGA034264	-2.9726	2.4067e-09	6.2391e-08
BGIOSGA034292	-3.2341	1.0171e-09	2.7482e-08
BGIOSGA034294	-3.3432	3.814e-19	2.1044e-17
BGIOSGA034297	3.1489	1.9135e-12	6.8548e-11
BGIOSGA034298	3.5583	1.6893e-05	0.00024585
BGIOSGA034309	-1.8059	1.9781e-41	2.8486e-39
BGIOSGA034312	1.7127	3.5232e-34	4.0429e-32
BGIOSGA034313	-3.4759	3.9455e-12	1.3774e-10
BGIOSGA034327	-4.2568	0.0003917	0.0041738
BGIOSGA034377	-1.7236	8.3026e-05	0.0010497
BGIOSGA034387	-2.3244	1.8666e-10	5.4763e-09
BGIOSGA034434	1.0902	3.6852e-48	6.6339e-46
BGIOSGA034478	-3.0301	1.3524e-13	5.3286e-12
BGIOSGA034481	-2.3935	5.44e-06	8.7777e-05
BGIOSGA034486	-3.2401	2.7598e-103	1.7664e-100
BGIOSGA034501	-1.8029	0.00045527	0.004763
BGIOSGA034524	-2.7163	8.1396e-06	0.00012714
BGIOSGA034528	-2.1538	1.0035e-17	5.1336e-16
BGIOSGA034563	-1.795	4.5492e-08	1.0157e-06
BGIOSGA034606	1.8101	9.1149e-05	0.0011409
BGIOSGA034616	-3.3409	9.406e-07	1.7267e-05
BGIOSGA034624	1.073	1.3727e-22	9.2163e-21
BGIOSGA034654	1.456	4.1679e-21	2.5984e-19
BGIOSGA034674	-1.3777	4.2551e-05	0.0005743
BGIOSGA034677	-3.82	2.5968e-05	0.00036471
BGIOSGA034680	4.0296	8.9159e-138	9.511e-135
BGIOSGA034712	1.6292	0.00024457	0.0027602
BGIOSGA034713	-2.1225	8.3901e-09	2.0514e-07
BGIOSGA034730	2.6282	1.7013e-06	2.9861e-05
BGIOSGA034766	-3.2787	3.7473e-19	2.0716e-17
BGIOSGA034784	-2.0816	9.5744e-05	0.0011922
BGIOSGA034792	1.3237	1.8817e-07	3.8059e-06
BGIOSGA034801	-4.6989	6.744e-10	1.8749e-08
BGIOSGA034863	-2.597	8.383e-26	6.4386e-24
BGIOSGA034934	-1.2729	3.5337e-07	6.9141e-06
BGIOSGA034993	-1.1475	2.2068e-09	5.7314e-08
BGIOSGA035038	-2.6207	1.0185e-10	3.0781e-09
BGIOSGA035053	1.2409	4.3256e-06	7.0908e-05
BGIOSGA035192	-2.8514	1.5678e-20	9.4074e-19
BGIOSGA035193	-3.2716	4.4265e-16	2.0832e-14
BGIOSGA035267	-1.5448	2.8036e-13	1.0724e-11
BGIOSGA035301	2.22	7.1561e-07	1.3315e-05
BGIOSGA035351	-1.8958	2.8552e-12	1.0066e-10
BGIOSGA035352	1.5432	0.00012071	0.001472
BGIOSGA035354	1.5407	1.7161e-11	5.6232e-10
BGIOSGA035438	1.1126	0.00015457	0.0018389
BGIOSGA035439	-2.7502	6.622e-12	2.2625e-10
BGIOSGA035519	-1.7094	3.4562e-20	2.0357e-18
BGIOSGA035562	-1.6135	3.5658e-07	6.9535e-06
BGIOSGA035673	2.2823	0.0002158	0.0024665
BGIOSGA035695	-4.0449	6.9543e-06	0.00011011
BGIOSGA035696	1.2742	2.7965e-07	5.5243e-06
BGIOSGA035741	-2.2432	0.00010542	0.0013021
BGIOSGA035751	-2.1522	0.0001061	0.0013092
BGIOSGA035805	1.347	5.5531e-11	1.7272e-09
BGIOSGA035815	1.449	1.2818e-05	0.00019148
BGIOSGA035818	2.4684	7.2662e-13	2.6728e-11
BGIOSGA035827	3.4701	0.00031068	0.003392
BGIOSGA035840	1.5501	4.9189e-16	2.3074e-14
BGIOSGA035845	1.9535	6.9013e-47	1.1902e-44
BGIOSGA035880	1.6546	7.7262e-05	0.00098421
BGIOSGA035884	1.5083	0.00031336	0.0034175
BGIOSGA035930	-2.324	9.0492e-05	0.0011342
BGIOSGA035933	-2.6512	1.9442e-47	3.3938e-45
BGIOSGA035952	1.6137	1.7464e-07	3.5472e-06
BGIOSGA035979	-4.3558	2.4771e-47	4.2979e-45
BGIOSGA035984	-2.9171	1.0955e-08	2.6494e-07
BGIOSGA036005	1.8769	7.5903e-05	0.00096819
BGIOSGA036037	-1.5372	1.7587e-06	3.0755e-05
BGIOSGA036038	-1.3386	2.1949e-09	5.7056e-08
BGIOSGA036047	-1.9318	3.215e-11	1.0232e-09
BGIOSGA036115	-3.7818	2.6574e-11	8.5044e-10
BGIOSGA036141	-1.6695	9.7298e-05	0.0012101
BGIOSGA036143	5.836	2.2776e-18	1.2036e-16
BGIOSGA036177	4.6395	0.00032238	0.0035012
BGIOSGA036198	1.023	0.0002639	0.0029552
BGIOSGA036201	-4.3076	1.1009e-17	5.6218e-16
BGIOSGA036214	3.4091	3.6064e-30	3.4056e-28
BGIOSGA036237	1.6765	0.00012011	0.0014665
BGIOSGA036246	-3.2071	5.1458e-07	9.7829e-06
BGIOSGA036265	1.1281	2.2915e-08	5.3484e-07
BGIOSGA036403	-1.9192	3.3117e-07	6.5064e-06
BGIOSGA036440	-1.6096	2.3561e-11	7.6077e-10
BGIOSGA036472	-4.6315	1.0303e-09	2.7812e-08
BGIOSGA036475	1.3554	6.6649e-14	2.6848e-12
BGIOSGA036477	-2.8254	1.9525e-09	5.1216e-08
BGIOSGA036516	-2.9115	5.229e-33	5.7048e-31
BGIOSGA036544	-2.8927	0.00015843	0.0018793
BGIOSGA036581	-1.4216	5.5215e-08	1.214e-06
BGIOSGA036593	-2.1087	5.6016e-16	2.6234e-14
BGIOSGA036607	-5.7046	7.5945e-06	0.0001194
BGIOSGA036608	-6.0282	1.6285e-08	3.8732e-07
BGIOSGA036609	-5.4609	2.2271e-06	3.8296e-05
BGIOSGA036610	-6.6445	3.1787e-08	7.295e-07
BGIOSGA036628	-3.1678	2.1331e-57	4.7999e-55
BGIOSGA036639	2.3969	5.8461e-10	1.6395e-08
BGIOSGA036641	1.4253	5.9426e-06	9.5195e-05
BGIOSGA036663	-2.1549	2.0813e-18	1.1019e-16
BGIOSGA036683	-2.366	1.961e-05	0.00028213
BGIOSGA036685	-1.8374	2.0612e-10	6.021e-09
BGIOSGA036751	2.28	1.7737e-05	0.00025737
BGIOSGA036759	-1.9793	4.1014e-09	1.039e-07
BGIOSGA036760	-2.8792	2.5716e-05	0.00036166
BGIOSGA036836	-2.995	1.2465e-05	0.0001864
BGIOSGA036847	1.1967	2.8653e-06	4.8346e-05
BGIOSGA036858	1.7522	7.0943e-21	4.3382e-19
BGIOSGA036862	2.4232	0.00014972	0.0017878
BGIOSGA036874	1.4177	0.00047017	0.0048967
BGIOSGA036880	5.0677	1.1132e-187	2.4664e-184
BGIOSGA036907	1.2599	6.4538e-15	2.8036e-13
BGIOSGA036920	-2.3836	3.2423e-06	5.4325e-05
BGIOSGA036982	1.0233	7.0242e-07	1.3078e-05
BGIOSGA036990	-2.5887	5.3486e-42	7.9001e-40
BGIOSGA037012	1.823	5.083e-05	0.00067435
BGIOSGA037034	1.1987	1.1808e-11	3.918e-10
BGIOSGA037048	-2.3455	1.1552e-05	0.00017447
BGIOSGA037049	-2.7323	4.2387e-08	9.5378e-07
BGIOSGA037080	-1.8377	1.2322e-06	2.2154e-05
BGIOSGA037101	-3.6422	4.149e-69	1.2989e-66
BGIOSGA037180	4.0196	0.00037073	0.0039606
BGIOSGA037181	-1.9184	4.4002e-07	8.483e-06
BGIOSGA037230	1.2646	5.8833e-05	0.00076883
BGIOSGA037241	-5.351	1.3141e-10	3.9264e-09
BGIOSGA037304	1.0799	1.2377e-08	2.9831e-07
BGIOSGA037345	-3.2945	8.8574e-06	0.00013745
BGIOSGA037385	-4.0156	6.2528e-09	1.5472e-07
BGIOSGA037452	-1.4664	4.6828e-05	0.0006279
[truncated: 64 more rows]

## Sheet: cluster analysis
The cluster for differential expression genes in indica cultivar Guinongzhan and Wushansimiao (R534)
Type1				Type2				type 3
group 1				group 4				group 2				group 3				group 5
Gene_id	log2FC_Wushansimiao (R534)(RKN vs mock)	log2FC_Guinongzhan(RKN vs mock)		Gene_id	log2FC_Wushansimiao (R534)(RKN vs mock)	log2FC_Guinongzhan(RKN vs mock)		Gene_id	log2FC_Wushansimiao (R534)(RKN vs mock)	log2FC_Guinongzhan(RKN vs mock)		Gene_id	log2FC_Wushansimiao (R534)(RKN vs mock)	log2FC_Guinongzhan(RKN vs mock)		Gene_id	log2FC_Wushansimiao (R534)(RKN vs mock)	log2FC_Guinongzhan(RKN vs mock)
BGIOSGA000019	-1.8081	-3.403		BGIOSGA000093	1.503	0.63229		BGIOSGA000075	0.052313	-1.8042		BGIOSGA000010	-2.3588	2.219		BGIOSGA000154	1.6756	-1.2458
BGIOSGA000087	-3.1886	-4.8468		BGIOSGA000147	1.0028	1.2668		BGIOSGA000076	0.72641	-5.5665		BGIOSGA000023	0.22959	2.0131		BGIOSGA000215	1.4437	-0.22668
BGIOSGA000097	-2.0617	-2.0958		BGIOSGA000262	1.0991	1.1327		BGIOSGA000156	1.4539	-3.409		BGIOSGA000382	-1.5631	0.54224		BGIOSGA000378	2.3721	-0.57397
BGIOSGA000109	-2.4297	-1.1996		BGIOSGA000314	1.0183	1.5433		BGIOSGA000356	0.52673	-1.8067		BGIOSGA000518	-1.0418	1.8677		BGIOSGA000438	1.2035	-1.0934
BGIOSGA000113	-2.1277	-2.396		BGIOSGA000338	0.65952	1.1204		BGIOSGA000393	0.25179	-1.2149		BGIOSGA000566	0.11574	3.2895		BGIOSGA000681	3.0039	-2.255
BGIOSGA000153	-0.35849	-1.2587		BGIOSGA000339	1.1757	0.061014		BGIOSGA000428	-0.047794	-3.0499		BGIOSGA000808	-2.9995	2.1857		BGIOSGA000765	1.3452	-0.24997
BGIOSGA000176	-3.3235	-3.4026		BGIOSGA000369	1.446	0.44046		BGIOSGA000452	0.89634	-3.8892		BGIOSGA002246	-1.3216	1.0431		BGIOSGA000854	1.437	-0.30505
BGIOSGA000187	-1.2191	-1.5489		BGIOSGA000396	0.92239	1.4069		BGIOSGA001069	0.061861	-2.4534		BGIOSGA002270	0.17798	1.937		BGIOSGA001013	1.5524	-0.83707
BGIOSGA000259	-0.9759	-1.7526		BGIOSGA000476	0.27721	1.6467		BGIOSGA001233	0.24642	-2.2616		BGIOSGA002861	-0.059546	1.1625		BGIOSGA001994	3.3466	-0.46919
BGIOSGA000260	-1.5026	-2.648		BGIOSGA000580	0.53151	1.0906		BGIOSGA001480	0.61717	-1.5151		BGIOSGA002943	-2.5339	0.41973		BGIOSGA003019	1.0347	-0.24348
BGIOSGA000279	-0.41928	-1.0698		BGIOSGA000812	2.2055	1.5413		BGIOSGA001631	0.75116	-2.0156		BGIOSGA003591	-0.051009	1.346		BGIOSGA003364	1.074	-0.30439
BGIOSGA000290	-0.48158	-1.6327		BGIOSGA000820	1.4475	0.030473		BGIOSGA001663	3.15	0.78122		BGIOSGA003595	-5.9174	2.0196		BGIOSGA003571	1.0684	-1.4357
BGIOSGA000319	-2.9465	-0.95952		BGIOSGA000837	1.8542	2.5262		BGIOSGA001673	0.87157	-2.0038		BGIOSGA003803	0.022953	1.9448		BGIOSGA003897	3.8792	-0.43302
BGIOSGA000342	-1.3346	-3.8284		BGIOSGA000847	1.8296	1.3521		BGIOSGA001797	0.034173	-3.1338		BGIOSGA003865	-4.838	1.853		BGIOSGA004044	2.1546	-0.87845
BGIOSGA000374	-0.93764	-2.1382		BGIOSGA000859	1.3861	0.35424		BGIOSGA002235	0.054219	-1.5117		BGIOSGA004232	-1.05	0.41584		BGIOSGA004285	1.1999	-1.7795
BGIOSGA000383	-0.39189	-1.7156		BGIOSGA001046	2.1363	2.1928		BGIOSGA002244	0.71999	-1.6334		BGIOSGA004906	-0.01374	1.5313		BGIOSGA004470	1.5874	-1.9043
BGIOSGA000435	-2.0996	-4.6871		BGIOSGA001110	1.5644	0.66613		BGIOSGA002313	0.44662	-2.0888		BGIOSGA004915	0.019796	1.388		BGIOSGA004703	5.7819	-2.3449
BGIOSGA000440	-3.9594	-4.6636		BGIOSGA001175	1.2268	1.4793		BGIOSGA002455	0.87168	-1.701		BGIOSGA005262	-1.4205	0.4197		BGIOSGA004722	2.5987	-3.6732
BGIOSGA000442	-3.1349	-0.94719		BGIOSGA001180	1.172	4.2142		BGIOSGA002912	0.27524	-1.8663		BGIOSGA005263	0.0088018	1.719		BGIOSGA004843	0.89146	-1.2288
BGIOSGA000466	-2.5122	-4.3999		BGIOSGA001203	0.74785	1.0709		BGIOSGA002913	0.41422	-3.6427		BGIOSGA005809	-3.2774	0.73671		BGIOSGA004922	2.645	-1.3237
BGIOSGA000481	-0.16011	-2.1195		BGIOSGA001325	1.2311	1.1021		BGIOSGA003081	0.74091	-7.515		BGIOSGA005904	-0.35404	1.0951		BGIOSGA004982	1.2409	-0.40921
BGIOSGA000498	-1.7073	-2.6635		BGIOSGA001448	5.7853	0.73846		BGIOSGA003852	0.61283	-1.293		BGIOSGA006053	-0.36562	1.1227		BGIOSGA004992	0.78923	-1.192
BGIOSGA000531	-1.699	-1.1417		BGIOSGA001611	1.625	2.1624		BGIOSGA003879	0.10123	-3.6576		BGIOSGA006355	-0.16365	1.1896		BGIOSGA005278	1.9825	-0.65331
BGIOSGA000551	-1.8378	-3.7736		BGIOSGA001620	1.738	1.3674		BGIOSGA003961	0.56686	-2.1991		BGIOSGA007234	-1.4194	2.5491		BGIOSGA005351	1.0419	-0.24993
BGIOSGA000571	-1.3154	-1.3102		BGIOSGA001700	2.7162	4.8169		BGIOSGA004073	0.56183	-3.6318		BGIOSGA007345	-0.24964	2.5421		BGIOSGA005531	3.9405	-0.73476
BGIOSGA000583	-1.8138	-3.9272		BGIOSGA001872	1.7274	1.6015		BGIOSGA004364	0.61327	-3.6538		BGIOSGA008760	0.047749	1.0335		BGIOSGA006127	2.3355	-2.9565
BGIOSGA000591	-0.1161	-1.2853		BGIOSGA001898	1.0634	1.1722		BGIOSGA004562	0.26656	-1.6707		BGIOSGA009041	0.022312	1.4735		BGIOSGA006996	1.2636	-0.18999
BGIOSGA000595	-1.7107	-2.3223		BGIOSGA001907	2.672	0.9313		BGIOSGA004771	0.76431	-1.5201		BGIOSGA009388	-0.24893	2.1888		BGIOSGA007262	2.3513	-2.1873
BGIOSGA000598	-0.42224	-2.1031		BGIOSGA001964	1.5794	0.53155		BGIOSGA004809	0.022805	-5.5803		BGIOSGA009524	-1.339	0.26958		BGIOSGA007372	2.4933	-2.2448
BGIOSGA000601	-1.1403	-2.9352		BGIOSGA001992	1.0919	1.0605		BGIOSGA004841	0.14602	-1.45		BGIOSGA009536	-1.6362	0.17991		BGIOSGA007656	1.1187	-0.73804
BGIOSGA000605	-0.50508	-1.1179		BGIOSGA002054	0.56473	1.2596		BGIOSGA004862	0.047459	-1.4714		BGIOSGA010543	-0.24051	1.2871		BGIOSGA007670	2.4633	-3.3074
BGIOSGA000620	-1.9228	-0.72039		BGIOSGA002148	2.8868	2.7261		BGIOSGA005014	0.091634	-1.8774		BGIOSGA010599	-0.37651	1.9385		BGIOSGA008481	1.1593	-0.90772
BGIOSGA000634	-4.0197	-2.7877		BGIOSGA002155	1.1475	0.3049		BGIOSGA005545	0.3207	-2.239		BGIOSGA010778	-0.62156	1.6179		BGIOSGA008556	1.4774	-0.1545
BGIOSGA000635	-3.9461	-1.6196		BGIOSGA002254	0.70154	1.9995		BGIOSGA005729	-0.013621	-1.9751		BGIOSGA010964	-1.1244	0.79262		BGIOSGA008564	1.6556	-0.10813
BGIOSGA000645	-0.96534	-1.9375		BGIOSGA002265	1.0762	0.82699		BGIOSGA005802	1.1638	-5.5234		BGIOSGA011068	0.051353	1.1643		BGIOSGA008983	2.6516	-0.56642
BGIOSGA000657	-0.41333	-1.7137		BGIOSGA002281	1.0341	0.11354		BGIOSGA005869	0.032348	-2.4946		BGIOSGA011133	0.12801	1.4708		BGIOSGA009380	3.2345	-2.8277
BGIOSGA000658	-1.0935	-2.4966		BGIOSGA002299	1.1457	1.9177		BGIOSGA006014	0.53762	-2.6089		BGIOSGA011326	-0.17215	1.2214		BGIOSGA009502	1.0478	-1.2097
BGIOSGA000659	-3.7927	-4.1431		BGIOSGA002306	1.7903	2.6754		BGIOSGA006087	0.41349	-3.4431		BGIOSGA011562	0.12378	1.0888		BGIOSGA009619	3.4218	-2.2028
BGIOSGA000660	-1.1333	-2.6516		BGIOSGA002307	4.275	3.7045		BGIOSGA006274	0.47016	-2.1118		BGIOSGA011567	-0.056602	1.075		BGIOSGA009826	4.243	-2.5109
BGIOSGA000677	-0.79211	-3.3852		BGIOSGA002310	1.0433	1.6385		BGIOSGA006292	0.034271	-2.8087		BGIOSGA011660	0.10594	1.5737		BGIOSGA010121	1.4683	-0.41347
BGIOSGA000689	-3.5823	-5.7122		BGIOSGA002432	0.96413	1.2046		BGIOSGA006365	0.75422	-2.0702		BGIOSGA011831	0.26191	3.0953		BGIOSGA010890	2.323	-1.567
BGIOSGA000693	-1.7678	-3.5725		BGIOSGA002447	2.1149	1.244		BGIOSGA006399	0.27711	-2.4684		BGIOSGA012220	0.6667	2.2579		BGIOSGA010938	1.3191	-0.50875
BGIOSGA000706	-0.23614	-1.1605		BGIOSGA002449	0.62108	1.2741		BGIOSGA006505	1.3549	-2.2586		BGIOSGA013642	-0.0053057	1.1078		BGIOSGA010948	1.553	-2.0934
BGIOSGA000719	-2.1127	-2.4637		BGIOSGA002451	1.4844	1.094		BGIOSGA007036	0.18121	-1.2037		BGIOSGA014122	-1.6806	0.3098		BGIOSGA011106	1.5016	-0.35103
BGIOSGA000724	-1.0455	-2.7186		BGIOSGA002458	2.0216	0.331		BGIOSGA007436	0.22809	-1.7962		BGIOSGA014578	-0.13086	1.3349		BGIOSGA011848	1.023	-0.1971
BGIOSGA000747	-0.30352	-1.7877		BGIOSGA002503	1.0988	1.6443		BGIOSGA007637	0.34979	-2.3747		BGIOSGA015825	-1.3435	0.2279		BGIOSGA012500	2.0945	-0.26885
BGIOSGA000748	-2.2343	-3.2731		BGIOSGA002507	1.23	1.5772		BGIOSGA007875	0.33213	-2.2067		BGIOSGA016364	-0.79824	1.2056		BGIOSGA013300	2.1889	-2.7828
BGIOSGA000753	-0.60158	-4.2723		BGIOSGA002527	1.1768	0.40886		BGIOSGA007879	1.0645	-2.6822		BGIOSGA016450	0.16755	1.4347		BGIOSGA013301	6.4931	-1.4862
BGIOSGA000754	-0.62901	-2.1232		BGIOSGA002551	3.7687	1.5362		BGIOSGA008148	0.8023	-1.7209		BGIOSGA017389	-3.1771	0.45062		BGIOSGA013365	1.0621	-0.57048
BGIOSGA000756	-4.166	-1.6851		BGIOSGA002564	3.0318	2.5024		BGIOSGA008177	0.1216	-1.7176		BGIOSGA017625	-0.76095	1.1957		BGIOSGA014182	1.7121	-0.6393
BGIOSGA000795	-3.0973	-3.8199		BGIOSGA002633	0.36685	1.1416		BGIOSGA008278	0.022325	-3.6646		BGIOSGA017715	-0.096638	1.3179		BGIOSGA014483	2.3799	-0.28241
BGIOSGA000823	-1.3378	-2.8272		BGIOSGA002634	1.0565	2.1188		BGIOSGA008338	0.76543	-1.877		BGIOSGA018405	-1.3466	0.5887		BGIOSGA015065	1.0974	-0.30898
BGIOSGA000826	-0.77779	-1.3144		BGIOSGA002690	2.0115	0.0072555		BGIOSGA008342	0.30389	-1.9206		BGIOSGA018439	-0.64042	4.7947		BGIOSGA015483	1.7458	-0.68299
BGIOSGA000827	-1.388	-1.5821		BGIOSGA002704	0.50751	2.4422		BGIOSGA008632	0.78878	-3.275		BGIOSGA018441	-1.0446	6.1834		BGIOSGA015546	1.9902	-0.87479
BGIOSGA000828	-0.30427	-2.0067		BGIOSGA002744	0.73529	1.7889		BGIOSGA008640	1.1796	-4.6959		BGIOSGA018592	-0.081635	2.176		BGIOSGA015713	1.7042	-0.11356
BGIOSGA000836	-1.0101	-2.4505		BGIOSGA002869	1.2492	2.3939		BGIOSGA008641	1.7244	-2.6842		BGIOSGA018799	-2.5582	0.73775		BGIOSGA015928	1.1435	-0.73153
BGIOSGA000856	-1.4871	-1.8216		BGIOSGA002939	0.73605	1.6224		BGIOSGA008647	0.020768	-1.6005		BGIOSGA019252	0.0187	1.1328		BGIOSGA016275	1.1131	-0.1218
BGIOSGA000885	-0.066161	-1.7774		BGIOSGA002993	1.1328	2.1222		BGIOSGA008732	0.12674	-1.1106		BGIOSGA020030	-2.2497	2.362		BGIOSGA016401	1.7075	-2.0443
BGIOSGA000901	-1.8662	-1.7574		BGIOSGA003109	1.0058	0.96252		BGIOSGA008765	0.39468	-1.7774		BGIOSGA020031	-2.6217	1.5812		BGIOSGA016526	5.2029	-1.8873
BGIOSGA000905	-1.0211	-2.3493		BGIOSGA003198	1.24	2.3311		BGIOSGA008858	-0.0095197	-1.324		BGIOSGA020701	0.24166	2.6651		BGIOSGA016736	1.1482	-0.35507
BGIOSGA000911	-0.91059	-2.6892		BGIOSGA003215	5.5823	1.2396		BGIOSGA009118	0.29345	-2.902		BGIOSGA021108	-5.5076	0.90716		BGIOSGA017260	1.0052	-0.075172
BGIOSGA000945	-1.8425	-2.2197		BGIOSGA003251	0.23043	1.3482		BGIOSGA009455	0.81187	-2.4879		BGIOSGA021183	-0.28844	1.2503		BGIOSGA017365	3.5229	-0.34539
BGIOSGA000946	-1.0276	-3.9672		BGIOSGA003269	0.40323	1.753		BGIOSGA009480	0.022926	-1.137		BGIOSGA021512	-0.55874	1.3974		BGIOSGA017703	2.3261	-0.32906
BGIOSGA000957	-4.0259	-3.2484		BGIOSGA003361	2.1353	2.2668		BGIOSGA009843	0.30714	-1.4724		BGIOSGA021522	-0.11528	1.3841		BGIOSGA017720	3.8784	-0.63086
BGIOSGA000958	-3.3723	-2.5367		BGIOSGA003377	2.2287	0.94082		BGIOSGA009845	0.25133	-2.152		BGIOSGA021653	0.043733	1.6933		BGIOSGA017959	1.5456	-0.75589
BGIOSGA000982	-1.4315	-2.2356		BGIOSGA003411	2.153	1.6777		BGIOSGA009988	0.16374	-1.1975		BGIOSGA022836	-0.50698	1.4386		BGIOSGA017978	1.5014	-1.0113
BGIOSGA000988	-1.4001	-2.334		BGIOSGA003498	1.7505	0.20839		BGIOSGA010384	1.4703	-4.0443		BGIOSGA023120	-1.1805	4.3791		BGIOSGA018301	1.5013	-0.21689
BGIOSGA000995	-0.86606	-1.8042		BGIOSGA003516	0.55417	1.1607		BGIOSGA010611	0.57065	-1.8375		BGIOSGA023124	-0.59763	1.1056		BGIOSGA018547	0.86873	-1.0111
BGIOSGA001006	-1.3337	-0.88351		BGIOSGA003613	1.3275	1.699		BGIOSGA010704	0.13498	-2.9201		BGIOSGA023458	0.10677	1.2891		BGIOSGA019621	3.2115	-0.90662
BGIOSGA001029	-2.9334	-2.7636		BGIOSGA003766	1.0187	1.0435		BGIOSGA010816	0.090051	-1.3905		BGIOSGA023552	0.11278	1.4309		BGIOSGA019666	1.888	-2.7047
BGIOSGA001055	-1.3347	-2.8578		BGIOSGA003780	3.7098	4.1896		BGIOSGA011134	0.30837	-1.3377		BGIOSGA023852	-1.4416	0.3543		BGIOSGA019782	1.7308	-0.26543
BGIOSGA001060	-0.3976	-1.3303		BGIOSGA003781	3.8784	3.1177		BGIOSGA011196	0.94276	-2.8424		BGIOSGA024236	-0.056529	1.5923		BGIOSGA019928	4.6798	-1.198
BGIOSGA001066	-0.76403	-3.5011		BGIOSGA003832	1.6604	1.5952		BGIOSGA011309	-0.039291	-2.7011		BGIOSGA024321	-1.9167	0.6528		BGIOSGA020151	1.0355	-1.4186
BGIOSGA001093	-3.1216	-4.6746		BGIOSGA003885	2.7956	2.2884		BGIOSGA011714	0.43218	-1.1707		BGIOSGA025171	-1.2989	0.21571		BGIOSGA020220	1.7529	-0.90954
BGIOSGA001117	-1.1321	-1.8618		BGIOSGA004050	2.0227	1.0783		BGIOSGA011778	0.34671	-1.1321		BGIOSGA025243	-0.26412	2.5405		BGIOSGA020501	1.4211	-1.6554
BGIOSGA001172	-0.24508	-2.5971		BGIOSGA004123	1.9367	2.7441		BGIOSGA011834	1.9423	-4.3856		BGIOSGA025849	0.11686	3.1707		BGIOSGA020606	1.1925	-0.28691
BGIOSGA001181	-2.7757	-3.1503		BGIOSGA004131	1.5603	1.3375		BGIOSGA011856	1.3301	-2.282		BGIOSGA026375	0.13403	1.6142		BGIOSGA020821	1.4938	-2.0464
BGIOSGA001209	-1.1367	-1.8765		BGIOSGA004154	1.4952	2.1529		BGIOSGA011915	0.004716	-1.5004		BGIOSGA028054	-0.59973	1.4012		BGIOSGA020881	2.1432	-1.0646
BGIOSGA001229	-0.8449	-1.0548		BGIOSGA004187	1.2757	0.65186		BGIOSGA012275	0.32928	-1.1343		BGIOSGA028948	-0.17208	1.9806		BGIOSGA020972	2.6916	-0.86172
BGIOSGA001257	-1.0614	-2.667		BGIOSGA004259	3.2501	0.81679		BGIOSGA012306	0.20863	-2.0359		BGIOSGA029122	0.084981	1.2267		BGIOSGA021074	1.3067	-0.55455
BGIOSGA001314	-0.91307	-2.5835		BGIOSGA004310	1.136	-0.036916		BGIOSGA012380	1.1244	-2.7339		BGIOSGA029650	-2.0825	1.3335		BGIOSGA021665	2.1571	-0.26659
BGIOSGA001376	-2.3015	-2.9652		BGIOSGA004313	1.1724	0.28614		BGIOSGA012967	0.41296	-3.3366		BGIOSGA029673	-0.15721	1.2637		BGIOSGA021674	1.261	-1.8332
BGIOSGA001387	-0.31088	-1.587		BGIOSGA004323	1.1226	1.3714		BGIOSGA013470	0.15622	-1.1205		BGIOSGA029737	-0.007466	1.371		BGIOSGA021954	4.3936	-0.31402
BGIOSGA001432	-1.6872	-3.611		BGIOSGA004339	1.5537	2.0886		BGIOSGA013612	-0.014405	-3.2409		BGIOSGA029738	-0.2376	1.2834		BGIOSGA022167	1.0054	-0.3394
BGIOSGA001439	-0.63631	-1.4905		BGIOSGA004477	1.7453	2.1393		BGIOSGA013752	0.047057	-2.4306		BGIOSGA030826	-1.4561	0.39959		BGIOSGA022246	1.216	-0.30883
BGIOSGA001452	-0.46534	-1.5666		BGIOSGA004601	2.4584	2.0835		BGIOSGA013855	0.29345	-3.1278		BGIOSGA031098	-3.1154	3.8776		BGIOSGA022483	2.0861	-1.0274
BGIOSGA001540	-0.3808	-1.3825		BGIOSGA004691	1.4291	0.47652		BGIOSGA014124	0.22514	-1.4372		BGIOSGA031406	0.1706	1.6046		BGIOSGA022996	1.0883	-0.33487
BGIOSGA001549	-1.0936	-2.2051		BGIOSGA004707	2.8537	2.0575		BGIOSGA014177	0.86301	-1.4679		BGIOSGA031916	-0.040624	1.3772		BGIOSGA023473	1.49	-0.66376
BGIOSGA001576	-2.9207	-2.8186		BGIOSGA004775	1.7157	0.19247		BGIOSGA014319	0.24651	-1.0284		BGIOSGA032706	-1.5248	0.29204		BGIOSGA023476	1.2716	-0.88619
BGIOSGA001674	-0.80721	-1.6805		BGIOSGA004799	1.5851	0.96231		BGIOSGA014332	0.58646	-3.3822		BGIOSGA032858	-0.21201	1.2754		BGIOSGA023726	2.1627	-1.4851
BGIOSGA001791	-0.27059	-2.1167		BGIOSGA004810	2.1496	4.1677		BGIOSGA014358	0.07106	-2.3727		BGIOSGA033084	-1.0488	0.37601		BGIOSGA023953	1.4026	-0.24635
BGIOSGA001839	-1.7185	-2.541		BGIOSGA004820	2.1361	1.0298		BGIOSGA014412	0.54727	-2.276		BGIOSGA033092	-0.25864	2.5776		BGIOSGA024440	2.0327	-1.0662
BGIOSGA001856	-0.37452	-1.5988		BGIOSGA004840	2.1089	2.207		BGIOSGA014446	0.26308	-1.0804		BGIOSGA033443	-0.18864	1.3408		BGIOSGA024816	1.0283	-0.49331
BGIOSGA001876	-1.2788	-0.8405		BGIOSGA004882	1.1544	0.5926		BGIOSGA014635	0.25672	-1.0938		BGIOSGA034624	-0.31799	1.073		BGIOSGA025452	1.0652	-0.48345
BGIOSGA001894	-2.6533	-2.8588		BGIOSGA004889	1.1357	0.50758		BGIOSGA014981	0.1007	-1.2077		BGIOSGA035053	0.085472	1.2409		BGIOSGA026016	1.3268	-0.32781
BGIOSGA001951	-0.94259	-2.1627		BGIOSGA004908	0.42249	1.0032		BGIOSGA014994	0.049602	-2.114		BGIOSGA035696	-0.036769	1.2742		BGIOSGA026372	3.2037	-0.18847
BGIOSGA001967	-1.6827	-0.79927		BGIOSGA004923	0.50577	1.7664		BGIOSGA015091	-0.041414	-2.6791		BGIOSGA035952	-0.21334	1.6137		BGIOSGA026374	1.5959	-1.0402
BGIOSGA001968	-1.8121	-1.228		BGIOSGA005009	1.3406	0.22984		BGIOSGA015488	0.50185	-1.3001		BGIOSGA036143	-1.1914	5.836		BGIOSGA027176	1.0828	-0.18885
BGIOSGA002002	-4.4064	-1.4687		BGIOSGA005017	0.65685	1.1006		BGIOSGA016449	0.1231	-1.8268		BGIOSGA037623	0.069121	1.6538		BGIOSGA027919	2.8531	-0.20017
BGIOSGA002077	-0.11174	-2.724		BGIOSGA005044	1.085	0.24203		BGIOSGA016494	0.32692	-4.5391		BGIOSGA038158	-1.4894	2.4266		BGIOSGA027993	1.2594	-0.18428
BGIOSGA002129	-0.61489	-2.8781		BGIOSGA005063	0.33803	1.1167		BGIOSGA016514	0.37318	-2.1524		BGIOSGA040575	-0.30463	1.448		BGIOSGA028019	2.2094	-2.4606
BGIOSGA002186	-1.8395	-0.775		BGIOSGA005090	1.148	1.2777		BGIOSGA016747	0.30964	-1.5288		Novel00079	-3.8921	1.3971		BGIOSGA028103	1.2613	-0.09546
BGIOSGA002204	-2.7041	-2.6968		BGIOSGA005203	0.55315	1.2584		BGIOSGA016813	0.1885	-1.4673		Novel00388	-0.075029	1.3838		BGIOSGA028505	1.0561	-0.47973
BGIOSGA002207	-0.3425	-3.6191		BGIOSGA005264	1.3978	0.14896		BGIOSGA016847	0.32258	-1.8472						BGIOSGA028607	1.785	-0.18625
BGIOSGA002209	-1.5482	-2.0065		BGIOSGA005401	0.90631	1.6423		BGIOSGA017051	0.04664	-1.933						BGIOSGA028777	1.7502	-1.9728
BGIOSGA002217	-1.0957	-0.53186		BGIOSGA005463	1.6802	2.4671		BGIOSGA017090	0.51205	-1.0677						BGIOSGA028855	1.0388	-0.36126
BGIOSGA002229	-0.1302	-1.5758		BGIOSGA005537	1.0177	2.2007		BGIOSGA017186	0.053965	-1.8594						BGIOSGA029377	1.0941	-0.93994
BGIOSGA002260	-1.3581	-1.5219		BGIOSGA005555	3.5924	0.24203		BGIOSGA017295	-0.21469	-8.6854						BGIOSGA029976	1.5852	-0.36376
BGIOSGA002291	-1.039	-1.2261		BGIOSGA005652	0.45906	1.0396		BGIOSGA017440	0.10012	-2.0753						BGIOSGA030193	2.4619	-0.39846
BGIOSGA002311	-0.88209	-1.0247		BGIOSGA005660	1.3457	0.39447		BGIOSGA017452	0.62491	-1.7129						BGIOSGA030535	3.1611	-0.97692
BGIOSGA002348	-1.3769	-2.1731		BGIOSGA005667	1.2843	0.15848		BGIOSGA017481	0.3696	-2.5435						BGIOSGA030997	3.1299	-1.7574
BGIOSGA002441	-0.20858	-1.8153		BGIOSGA005774	1.6851	0.21085		BGIOSGA017506	0.37452	-2.6224						BGIOSGA031804	5.2643	-1.1451
BGIOSGA002446	-1.9445	-3.0682		BGIOSGA005777	3.109	3.5616		BGIOSGA017521	0.69308	-2.6294						BGIOSGA031944	2.8908	-3.2261
BGIOSGA002464	-1.2766	-0.80926		BGIOSGA005912	1.5584	0.99181		BGIOSGA017753	0.35758	-5.0946						BGIOSGA032580	3.41	-1.4562
BGIOSGA002492	-2.6675	-2.6636		BGIOSGA005934	0.73447	1.0073		BGIOSGA017876	3.5229	-4.2522						BGIOSGA032916	1.3219	-0.21412
BGIOSGA002556	-2.0328	-0.28991		BGIOSGA006116	3.4865	2.6651		BGIOSGA017886	-0.024723	-5.485						BGIOSGA033329	1.3946	-1.8544
BGIOSGA002618	-1.843	-2.1091		BGIOSGA006117	1.0205	0.666		BGIOSGA017926	-0.037372	-1.954						BGIOSGA033387	1.4109	-1.6347
BGIOSGA002635	-3.8453	-4.3599		BGIOSGA006531	1.3228	1.0914		BGIOSGA017964	0.49344	-1.1549						BGIOSGA033424	1.1672	-0.079861
BGIOSGA002640	-1.5128	-2.2742		BGIOSGA006546	1.0634	0.83266		BGIOSGA017976	0.54606	-1.0012						BGIOSGA033940	4.1008	-4.3879
BGIOSGA002693	-1.0069	-0.26238		BGIOSGA006714	0.97969	1.0117		BGIOSGA018389	0.61025	-4.0975						BGIOSGA034244	5.045	-0.71733
BGIOSGA002694	-0.97044	-1.7853		BGIOSGA006745	0.59812	1.0562		BGIOSGA018390	0.31846	-3.1039						BGIOSGA034432	5.1736	-0.59802
BGIOSGA002706	-0.17394	-1.7802		BGIOSGA006761	1.4033	1.257		BGIOSGA018508	1.5766	-2.7251						BGIOSGA034552	1.6986	-0.49454
BGIOSGA002708	-0.59722	-1.113		BGIOSGA006839	2.9013	2.7704		BGIOSGA018582	0.4844	-2.679						BGIOSGA034619	3.3238	-0.58341
BGIOSGA002720	-1.1593	-1.7647		BGIOSGA006914	0.31379	1.0265		BGIOSGA018699	0.070422	-1.1382						BGIOSGA034670	1.7983	-0.99641
BGIOSGA002733	-0.2113	-3.8237		BGIOSGA006970	0.84769	1.4365		BGIOSGA018760	0.2261	-1.8064						BGIOSGA035159	1.0812	-0.062784
BGIOSGA002866	-3.4294	-2.8381		BGIOSGA007196	3.2433	0.69488		BGIOSGA018789	0.23131	-2.0271						BGIOSGA035541	1.6742	-0.6421
BGIOSGA002875	-0.9157	-2.4298		BGIOSGA007252	1.3953	2.9005		BGIOSGA018948	0.6575	-1.3865						BGIOSGA036091	1.0266	-0.83981
BGIOSGA002880	-1.4058	-2.2889		BGIOSGA007267	1.29	1.4656		BGIOSGA019137	0.060548	-3.0589						BGIOSGA036477	2.9959	-2.8254
BGIOSGA002918	-5.035	-5.3716		BGIOSGA007300	0.44694	1.6538		BGIOSGA019338	1.6627	-4.8686						BGIOSGA036501	1.108	-0.23339
BGIOSGA002954	-1.7495	-0.47714		BGIOSGA007410	0.83842	1.2292		BGIOSGA019502	0.5113	-2.3527						BGIOSGA036773	1.0494	-0.090925
BGIOSGA002986	-0.16005	-1.6231		BGIOSGA007420	1.916	2.6325		BGIOSGA019646	2.9394	-2.7067						BGIOSGA037181	1.8873	-1.9184
BGIOSGA003043	-1.7136	-1.6426		BGIOSGA007449	2.0937	6.4459		BGIOSGA020018	0.1749	-1.8027						BGIOSGA037333	3.182	-1.5909
BGIOSGA003134	-1.5123	-3.0776		BGIOSGA007480	0.26372	1.2632		BGIOSGA020022	2.1459	-4.2365						BGIOSGA040494	4.4489	-3.7386
BGIOSGA003143	-0.45436	-2.4247		BGIOSGA007514	1.4227	0.71444		BGIOSGA020115	0.19431	-1.4979						Novel00024	1.5539	-0.66049
BGIOSGA003277	-3.4896	-1.9791		BGIOSGA007573	0.72835	1.0801		BGIOSGA020225	0.20153	-3.4345						Novel00398	2.6051	-0.6575
BGIOSGA003323	-4.9656	-5.134		BGIOSGA007620	1.2173	1.2268		BGIOSGA020289	0.83198	-2.7001						Novel01524	2.0495	-0.31
BGIOSGA003342	-5.0829	-3.0248		BGIOSGA007623	1.3987	1.0378		BGIOSGA020443	0.018593	-2.7454						Novel01794	3.7853	-0.76871
BGIOSGA003344	-0.63503	-2.5596		BGIOSGA007804	1.4304	1.1498		BGIOSGA020459	0.4722	-3.2991
BGIOSGA003457	-1.5793	-2.916		BGIOSGA007805	1.4186	1.0814		BGIOSGA020486	0.49883	-1.9908
BGIOSGA003576	-3.1279	-2.6333		BGIOSGA007818	1.6746	1.0125		BGIOSGA020510	0.39918	-4.171
BGIOSGA003620	-0.2964	-2.0029		BGIOSGA007853	1.7115	2.3248		BGIOSGA020802	0.0019571	-1.3891
BGIOSGA003801	-1.0469	-0.40352		BGIOSGA007854	0.64259	1.7291		BGIOSGA020862	0.14989	-1.4503
BGIOSGA003814	-2.0325	-1.4584		BGIOSGA007920	1.9257	3.0445		BGIOSGA020969	0.21747	-4.1237
BGIOSGA003836	-1.9488	-2.8054		BGIOSGA007956	1.297	0.418		BGIOSGA021046	0.77532	-1.2083
BGIOSGA003837	-2.5221	-3.1857		BGIOSGA007979	1.2447	0.65556		BGIOSGA021171	-0.0071016	-2.0545
BGIOSGA003839	-0.29687	-2.2745		BGIOSGA008027	1.9033	2.4556		BGIOSGA021174	2.3809	-4.9158
BGIOSGA003912	-3.1278	-2.3316		BGIOSGA008079	2.8867	3.8997		BGIOSGA021196	-0.070959	-3.2561
BGIOSGA003983	-1.2518	-2.4227		BGIOSGA008119	3.1098	3.2262		BGIOSGA021343	0.37949	-1.2781
BGIOSGA004016	-0.962	-1.4688		BGIOSGA008261	3.9581	3.4377		BGIOSGA021667	0.38636	-4.3289
BGIOSGA004017	-0.50911	-1.0949		BGIOSGA008343	0.69212	1.2108		BGIOSGA021669	0.25717	-4.4282
BGIOSGA004018	-0.13481	-1.9918		BGIOSGA008363	1.1749	0.58777		BGIOSGA021670	0.045106	-3.8239
BGIOSGA004035	-2.0747	-1.8532		BGIOSGA008375	2.6073	4.7447		BGIOSGA021672	0.49107	-1.7615
BGIOSGA004049	-3.5565	-4.7322		BGIOSGA008402	1.0492	0.30127		BGIOSGA021680	0.33191	-1.2633
BGIOSGA004078	-1.1458	-3.4573		BGIOSGA008543	1.2395	2.6471		BGIOSGA021922	0.00085627	-2.7994
BGIOSGA004099	-1.8538	-1.1248		BGIOSGA008544	1.2428	1.3499		BGIOSGA022125	0.19104	-1.1172
BGIOSGA004115	-3.6722	-2.0229		BGIOSGA008662	0.87255	1.4387		BGIOSGA022298	0.57029	-3.1385
BGIOSGA004125	-1.3604	-0.80695		BGIOSGA008727	2.3894	0.11321		BGIOSGA022334	0.71483	-1.2638
BGIOSGA004140	-0.5174	-2.0636		BGIOSGA008753	3.637	3.0345		BGIOSGA022428	-0.072116	-3.252
BGIOSGA004162	-0.55246	-1.034		BGIOSGA008789	0.95519	1.8089		BGIOSGA022872	1.2003	-4.4053
BGIOSGA004171	-2.486	-3.2942		BGIOSGA008952	1.7477	2.4404		BGIOSGA022873	-0.043582	-4.7305
BGIOSGA004181	-1.8625	-2.435		BGIOSGA008993	2.1782	1.7356		BGIOSGA022900	0.20787	-1.7444
BGIOSGA004200	-2.9623	-3.183		BGIOSGA009042	1.8883	4.2449		BGIOSGA023903	0.10325	-1.12
BGIOSGA004210	-1.5157	-0.99297		BGIOSGA009061	1.0372	1.4607		BGIOSGA023992	0.3531	-3.4009
BGIOSGA004221	-2.0456	-3.3326		BGIOSGA009093	2.0994	1.6198		BGIOSGA024103	0.49899	-2.0722
BGIOSGA004250	-0.11302	-2.486		BGIOSGA009121	3.8851	1.8221		BGIOSGA024257	0.00040586	-2.1138
BGIOSGA004253	-2.0715	-1.8684		BGIOSGA009170	3.477	2.7262		BGIOSGA024381	0.39626	-1.7152
BGIOSGA004262	-0.30923	-1.6971		BGIOSGA009183	3.1638	3.9703		BGIOSGA024701	0.20896	-1.5368
BGIOSGA004268	-1.2798	-3.4981		BGIOSGA009313	0.44522	1.6822		BGIOSGA024735	0.11495	-2.8909
BGIOSGA004269	-2.0269	-2.6672		BGIOSGA009547	2.0241	2.1129		BGIOSGA024748	0.9106	-2.1011
BGIOSGA004292	-0.54255	-2.056		BGIOSGA009572	1.1843	0.10386		BGIOSGA024835	0.1172	-2.9125
BGIOSGA004296	-1.3782	-1.6686		BGIOSGA009631	7.2436	5.7878		BGIOSGA025039	0.27001	-1.1775
BGIOSGA004305	-0.22834	-1.4922		BGIOSGA009700	2.5307	0.07568		BGIOSGA025219	1.7752	-3.0786
BGIOSGA004307	-0.56476	-1.4702		BGIOSGA009775	2.2116	0.038925		BGIOSGA025234	0.6035	-1.5873
BGIOSGA004326	-1.2526	-2.7606		BGIOSGA009850	1.2435	0.95125		BGIOSGA025508	-0.0046336	-1.9777
BGIOSGA004352	-0.96759	-2.1374		BGIOSGA009901	1.4364	1.4308		BGIOSGA025727	0.77706	-1.3297
BGIOSGA004374	-1.1998	-1.7128		BGIOSGA009967	0.79732	1.3166		BGIOSGA025853	0.87419	-2.1175
BGIOSGA004427	-1.4839	-2.0777		BGIOSGA010013	1.1705	1.8622		BGIOSGA026093	1.2289	-10.621
BGIOSGA004437	-2.5846	-4.3307		BGIOSGA010105	1.4851	2.5943		BGIOSGA026094	1.1273	-4.0455
BGIOSGA004455	-0.73892	-1.9069		BGIOSGA010142	1.5259	1.0798		BGIOSGA026129	0.14053	-2.0837
BGIOSGA004480	-0.82661	-1.0672		BGIOSGA010182	1.5507	1.2385		BGIOSGA026164	-0.039299	-2.2646
BGIOSGA004485	-1.0085	-3.5552		BGIOSGA010188	0.86574	1.7888		BGIOSGA026430	0.37417	-2.6718
BGIOSGA004493	-1.4406	-1.3145		BGIOSGA010291	1.1815	0.28599		BGIOSGA026537	0.094144	-3.5778
BGIOSGA004522	-0.79774	-2.9345		BGIOSGA010431	3.1213	1.2523		BGIOSGA026603	0.29394	-1.8019
BGIOSGA004524	-0.37187	-1.9756		BGIOSGA010550	0.78225	1.8718		BGIOSGA026629	0.12895	-1.2116
BGIOSGA004529	-1.7459	-4.0843		BGIOSGA010848	1.6694	0.4554		BGIOSGA026730	3.5977	-0.43271
BGIOSGA004540	-3.1694	-6.6651		BGIOSGA010968	3.4415	1.0553		BGIOSGA026737	0.57359	-1.828
BGIOSGA004554	-1.049	-2.2628		BGIOSGA010969	1.8446	0.89758		BGIOSGA026796	-0.025481	-1.3938
BGIOSGA004602	-4.255	-5.0883		BGIOSGA010998	1.9495	4.0619		BGIOSGA026905	-0.046887	-2.4506
BGIOSGA004611	-1.2767	-1.7343		BGIOSGA011109	1.2471	0.13975		BGIOSGA027333	0.28767	-2.468
BGIOSGA004616	-1.7692	-2.2689		BGIOSGA011128	1.3963	0.64653		BGIOSGA027355	0.65967	-1.2181
BGIOSGA004633	-0.73876	-2.0224		BGIOSGA011132	1.3381	0.68763		BGIOSGA027641	1.9982	-3.3941
BGIOSGA004637	-5.501	-4.248		BGIOSGA011151	0.97357	1.4998		BGIOSGA027872	0.093136	-1.3096
BGIOSGA004673	-2.6879	-3.5723		BGIOSGA011180	0.58676	1.2732		BGIOSGA027915	0.37027	-2.2411
BGIOSGA004674	-0.15824	-1.5207		BGIOSGA011237	0.36384	1.7808		BGIOSGA028161	0.32178	-2.0856
BGIOSGA004696	-0.40477	-1.5402		BGIOSGA011246	0.91999	1.0047		BGIOSGA028355	0.98491	-3.0613
BGIOSGA004699	-1.9227	-3.8398		BGIOSGA011317	0.70418	2.0001		BGIOSGA028468	0.69351	-1.6201
BGIOSGA004705	-1.8226	-3.2767		BGIOSGA011335	1.0877	0.59039		BGIOSGA028543	1.2935	-2.6769
BGIOSGA004746	-1.3842	-1.7301		BGIOSGA011354	1.3834	1.2076		BGIOSGA028940	0.8551	-1.9126
BGIOSGA004768	-1.8685	-4.98		BGIOSGA011389	0.73295	1.1283		BGIOSGA029006	0.0086896	-2.0025
BGIOSGA004772	-0.65545	-1.3791		BGIOSGA011458	0.30482	1.3436		BGIOSGA029075	0.42242	-2.4711
BGIOSGA004776	-3.1685	-3.814		BGIOSGA011499	1.2548	0.93425		BGIOSGA029182	0.81453	-1.4795
BGIOSGA004778	-0.36546	-1.6144		BGIOSGA011504	1.1445	1.309		BGIOSGA029302	0.1891	-1.5098
BGIOSGA004805	-0.68669	-2.3489		BGIOSGA011507	1.2452	1.3924		BGIOSGA029367	0.15934	-1.2121
BGIOSGA004848	-3.4184	-4.9681		BGIOSGA011578	0.48912	1.0895		BGIOSGA029453	1.2626	-2.2568
BGIOSGA004852	-2.4197	-3.2099		BGIOSGA011657	4.1679	4.3571		BGIOSGA029486	0.38051	-1.4663
BGIOSGA004871	-0.65107	-1.7298		BGIOSGA011661	2.1492	2.0044		BGIOSGA029642	0.60906	-1.5324
BGIOSGA004902	-0.77232	-1.0558		BGIOSGA011664	5.7937	4.8356		BGIOSGA029680	0.25881	-2.2561
BGIOSGA004921	-1.0833	-0.84652		BGIOSGA011687	0.92319	1.0517		BGIOSGA029757	0.9181	-2.4512
BGIOSGA004938	-1.4199	-5.0889		BGIOSGA011734	2.1418	0.96286		BGIOSGA029759	0.03554	-1.4667
BGIOSGA004967	-2.8376	-4.2983		BGIOSGA011765	1.2183	-0.0080792		BGIOSGA029767	0.55022	-1.1836
BGIOSGA004971	-0.11237	-2.1832		BGIOSGA011774	0.66053	1.422		BGIOSGA029891	0.38255	-4.2434
BGIOSGA004972	-1.2122	-2.7905		BGIOSGA011782	2.0056	3.2633		BGIOSGA029962	0.45409	-2.1037
BGIOSGA005005	-4.2706	-3.4087		BGIOSGA011838	1.3767	1.1372		BGIOSGA030223	-0.047169	-1.977
BGIOSGA005006	-4.2816	-4.0941		BGIOSGA011866	1.2898	1.1777		BGIOSGA030631	0.01551	-3.3716
BGIOSGA005007	-4.1611	-3.8298		BGIOSGA011919	0.21015	1.2789		BGIOSGA031010	0.33233	-1.6408
BGIOSGA005099	-0.49497	-1.1815		BGIOSGA011956	1.407	0.61783		BGIOSGA031103	0.20902	-1.6724
BGIOSGA005105	-0.93671	-1.926		BGIOSGA011979	3.0678	0.71676		BGIOSGA031105	0.1624	-1.7113
BGIOSGA005118	-0.24614	-1.4547		BGIOSGA012007	1.4232	3.6515		BGIOSGA031518	0.2437	-2.64
BGIOSGA005120	-0.47117	-2.6384		BGIOSGA012015	3.0602	0.44651		BGIOSGA031679	1.3378	-6.6338
BGIOSGA005143	-2.7232	0.075977		BGIOSGA012045	2.4404	2.8168		BGIOSGA031703	0.49681	-1.4548
BGIOSGA005164	-2.0565	-1.6536		BGIOSGA012062	2.6765	2.6014		BGIOSGA031790	1.5981	-2.9358
BGIOSGA005166	-0.57049	-3.329		BGIOSGA012131	1.258	1.872		BGIOSGA031797	0.95832	-1.5018
BGIOSGA005167	-4.466	-5.3432		BGIOSGA012212	2.0266	0.78223		BGIOSGA031798	0.24433	-2.0807
BGIOSGA005168	-0.38061	-3.5184		BGIOSGA012215	2.1266	1.5268		BGIOSGA031800	1.1943	-1.95
BGIOSGA005178	-1.5493	-1.838		BGIOSGA012259	4.4489	3.9601		BGIOSGA031815	0.93964	-3.1851
BGIOSGA005185	-4.0696	-4.9242		BGIOSGA012309	1.3368	2.1534		BGIOSGA031825	0.61183	-1.946
BGIOSGA005196	-0.36341	-1.5383		BGIOSGA012406	2.0744	1.0707		BGIOSGA031826	0.33967	-1.7562
BGIOSGA005228	-1.9898	-0.58235		BGIOSGA012434	0.41286	1.3606		BGIOSGA031952	0.14941	-2.0941
BGIOSGA005257	-4.9299	-5.4279		BGIOSGA012436	2.0792	1.6533		BGIOSGA032182	0.46338	-4.1654
BGIOSGA005266	-3.8632	-2.8615		BGIOSGA012481	4.5984	2.3099		BGIOSGA032693	0.86293	-1.3901
BGIOSGA005283	-3.3276	-2.6538		BGIOSGA012552	1.0499	0.36947		BGIOSGA032778	0.7094	-3.0236
BGIOSGA005340	-0.39477	-3.2682		BGIOSGA012578	0.96357	1.3492		BGIOSGA033034	0.2442	-1.7667
BGIOSGA005376	-1.1501	-2.1965		BGIOSGA012647	1.0631	0.6735		BGIOSGA033076	0.087783	-1.1739
BGIOSGA005419	-0.26951	-3.6254		BGIOSGA012784	1.2754	0.056691		BGIOSGA033260	0.060022	-3.1221
BGIOSGA005458	-2.1216	-5.1789		BGIOSGA012815	0.72742	1.4447		BGIOSGA033328	0.90608	-3.502
BGIOSGA005462	-0.79989	-1.451		BGIOSGA012836	1.1768	2.145		BGIOSGA033393	0.10117	-1.0483
BGIOSGA005466	-0.32492	-1.4714		BGIOSGA012837	1.4401	0.64319		BGIOSGA033455	0.55749	-1.0508
BGIOSGA005481	-0.46166	-1.2254		BGIOSGA012852	1.1103	0.52477		BGIOSGA033993	2.1111	-4.0426
BGIOSGA005486	-6.794	-6.9423		BGIOSGA012871	0.25364	1.6086		BGIOSGA034012	1.5704	-2.9226
BGIOSGA005495	-2.8159	-4.0233		BGIOSGA013086	0.53842	1.6689		BGIOSGA034194	0.63178	-5.5844
BGIOSGA005514	-1.6543	-2.8136		BGIOSGA013088	3.0809	2.1337		BGIOSGA034309	0.72792	-1.8059
BGIOSGA005539	-3.0051	-1.2394		BGIOSGA013093	1.3564	1.3879		BGIOSGA034387	0.0029377	-2.3244
BGIOSGA005551	-1.1725	-2.0163		BGIOSGA013211	1.342	1.3393		BGIOSGA034524	1.3997	-2.7163
BGIOSGA005557	-3.3952	-4.2747		BGIOSGA013235	1.8119	-0.043371		BGIOSGA034674	0.11118	-1.3777
BGIOSGA005581	-1.2896	-0.50969		BGIOSGA013249	2.0168	2.6068		BGIOSGA034801	0.019508	-4.6989
BGIOSGA005584	-2.27	-3.0061		BGIOSGA013266	3.8099	2.0527		BGIOSGA034934	-0.025369	-1.2729
BGIOSGA005588	-1.958	-0.7784		BGIOSGA013327	3.0226	2.6811		BGIOSGA035562	0.7582	-1.6135
BGIOSGA005591	-2.3848	-1.981		BGIOSGA013440	1.2676	0.63485		BGIOSGA035741	0.21004	-2.2432
BGIOSGA005592	-2.1586	-2.1282		BGIOSGA013502	1.1238	-0.017016		BGIOSGA035979	-0.03988	-4.3558
BGIOSGA005593	-3.583	-2.9823		BGIOSGA013516	1.6377	1.4139		BGIOSGA036610	0.8598	-6.6445
BGIOSGA005595	-2.5361	-1.4038		BGIOSGA013525	1.4597	4.0453		BGIOSGA036683	0.071869	-2.366
BGIOSGA005599	-0.77952	-1.9754		BGIOSGA013570	1.5056	0.95459		BGIOSGA036759	0.87139	-1.9793
BGIOSGA005621	-0.79008	-2.0161		BGIOSGA013600	2.3156	2.5211		BGIOSGA036990	0.97093	-2.5887
BGIOSGA005636	-1.9956	-1.845		BGIOSGA013607	1.3951	1.0585		BGIOSGA037080	0.069395	-1.8377
BGIOSGA005648	-1.9954	-3.3261		BGIOSGA013646	1.2893	0.96523		BGIOSGA037452	0.68236	-1.4664
BGIOSGA005649	-2.1617	-4.2966		BGIOSGA013775	2.8609	1.6046		BGIOSGA037531	3.2907	0.096455
BGIOSGA005655	-1.6722	-1.3985		BGIOSGA013836	0.72281	1.1521		BGIOSGA037594	0.089251	-1.6745
BGIOSGA005656	-2.3197	-2.6253		BGIOSGA013861	1.1419	2.2192		BGIOSGA037800	0.18742	-3.958
BGIOSGA005657	-2.5502	-2.934		BGIOSGA013883	0.85273	1.3039		BGIOSGA037904	0.24488	-2.812
BGIOSGA005668	-2.8162	-5.8561		BGIOSGA013903	1.9619	0.28994		BGIOSGA038061	0.47371	-1.4477
BGIOSGA005743	-0.14079	-1.8146		BGIOSGA013939	1.5067	0.75175		Novel00750	0.5917	-3.3231
BGIOSGA005746	-1.2582	-1.7222		BGIOSGA013985	1.6466	2.8796		Novel01238	0.8168	-2.4114
BGIOSGA005752	-2.163	-1.619		BGIOSGA014054	1.1544	1.2255		Novel01455	0.36043	-2.7671
BGIOSGA005770	-1.3672	-2.1463		BGIOSGA014088	1.211	0.046277
BGIOSGA005775	-1.0628	-1.9932		BGIOSGA014106	1.1559	1.5503
BGIOSGA005813	-1.3989	-2.2411		BGIOSGA014116	1.3616	0.48981
BGIOSGA005817	-1.2134	-1.2592		BGIOSGA014158	2.8303	1.7995
BGIOSGA005822	-1.1624	-1.7023		BGIOSGA014207	1.8074	0.56554
BGIOSGA005831	-0.55275	-1.0943		BGIOSGA014213	1.7684	0.71852
BGIOSGA005837	-0.44598	-1.9203		BGIOSGA014250	1.122	1.9943
BGIOSGA005838	-3.9826	-3.6965		BGIOSGA014273	2.762	2.5367
BGIOSGA005852	-2.1083	-1.5728		BGIOSGA014274	3.4009	2.0743
BGIOSGA005855	-1.0805	-1.6593		BGIOSGA014275	4.9303	2.4421
BGIOSGA005856	-3.9984	-1.4217		BGIOSGA014276	4.3134	2.2523
BGIOSGA005863	-1.8357	-2.6163		BGIOSGA014316	0.51498	1.2525
BGIOSGA005875	-0.59384	-1.6819		BGIOSGA014393	1.0895	0.99286
BGIOSGA005896	-2.9508	-3.3101		BGIOSGA014466	1.5436	0.863
BGIOSGA005915	-1.5388	-1.3343		BGIOSGA014467	1.2208	1.6089
BGIOSGA005916	-1.5793	-2.3953		BGIOSGA014500	5.9682	-0.035223
BGIOSGA005930	-1.1544	-3.3165		BGIOSGA014517	0.27511	1.2171
BGIOSGA005931	-2.8413	-1.9132		BGIOSGA014539	1.5567	1.4888
BGIOSGA005966	-2.605	-2.155		BGIOSGA014547	0.53567	1.0729
BGIOSGA005991	-0.35799	-2.691		BGIOSGA014892	0.96962	1.3118
BGIOSGA005994	-1.9827	-0.71733		BGIOSGA014893	2.3907	3.0094
BGIOSGA005995	-2.1189	-2.5158		BGIOSGA014985	1.2052	1.5448
BGIOSGA005998	-0.36493	-1.8639		BGIOSGA015125	1.1828	1.473
BGIOSGA005999	-2.425	-2.2271		BGIOSGA015140	1.3784	1.2084
BGIOSGA006005	-2.7315	-3.4726		BGIOSGA015157	1.0333	0.081077
BGIOSGA006030	-4.4174	-4.838		BGIOSGA015291	2.5062	4.3621
BGIOSGA006057	-2.5821	-1.257		BGIOSGA015491	3.8498	0.28857
BGIOSGA006132	-1.3349	-1.4743		BGIOSGA015512	1.2263	1.4218
BGIOSGA006159	-3.0997	-1.9267		BGIOSGA015742	0.3679	1.1499
BGIOSGA006160	-4.2468	-2.8961		BGIOSGA015756	1.3284	0.063055
BGIOSGA006161	-3.0472	-2.2587		BGIOSGA015834	1.5193	2.7849
BGIOSGA006162	-4.5817	-4.0683		BGIOSGA015843	1.879	1.7239
BGIOSGA006165	-2.6287	-5.5351		BGIOSGA016027	1.329	0.18662
BGIOSGA006198	-0.73745	-3.1876		BGIOSGA016105	2.7585	2.7304
BGIOSGA006207	-0.33803	-1.7792		BGIOSGA016129	2.373	1.3251
BGIOSGA006208	-2.0442	-2.1031		BGIOSGA016156	5.3981	1.3711
BGIOSGA006221	-1.3781	-1.3994		BGIOSGA016230	1.2283	1.255
BGIOSGA006243	-0.775	-1.7689		BGIOSGA016262	1.4982	2.1652
BGIOSGA006261	-0.69629	-1.4679		BGIOSGA016280	1.1167	1.5218
BGIOSGA006264	-1.2605	-2.7586		BGIOSGA016390	0.81009	1.994
BGIOSGA006283	-1.6793	-1.7152		BGIOSGA016393	4.5789	0.68522
BGIOSGA006284	-3.9451	0.065443		BGIOSGA016430	1.8678	0.2401
BGIOSGA006299	-2.4282	-5.5657		BGIOSGA016528	1.6434	0.16454
BGIOSGA006315	-2.6433	-2.2221		BGIOSGA016636	1.0171	0.56421
BGIOSGA006323	-0.6356	-2.2593		BGIOSGA016640	0.74774	1.0567
BGIOSGA006330	-0.12158	-2.0556		BGIOSGA016718	1.3068	0.6515
BGIOSGA006348	-3.9309	-4.5309		BGIOSGA016729	0.33492	1.4568
BGIOSGA006349	-2.4844	-1.4143		BGIOSGA016784	1.2041	1.3928
BGIOSGA006386	-1.6878	-3.2474		BGIOSGA016980	7.6063	3.7801
BGIOSGA006449	-2.581	-7.1677		BGIOSGA017057	3.5418	1.7013
BGIOSGA006467	-4.5276	-5.5762		BGIOSGA017060	1.7658	0.11529
BGIOSGA006492	-0.30845	-2.3586		BGIOSGA017123	2.5906	3.4294
BGIOSGA006502	-0.18287	-2.3361		BGIOSGA017143	0.76224	1.0987
BGIOSGA006504	-1.2617	-0.89873		BGIOSGA017251	1.6199	2.3938
BGIOSGA006559	-2.4334	-3.2427		BGIOSGA017254	1.414	0.99564
BGIOSGA006602	-1.4155	-3.5915		BGIOSGA017279	1.3752	0.59036
BGIOSGA006646	-1.1536	-3.7047		BGIOSGA017285	3.379	3.4132
BGIOSGA006724	-1.9343	-4.6319		BGIOSGA017361	1.4642	0.95051
BGIOSGA006753	-0.19296	-1.5319		BGIOSGA017399	1.4166	1.5151
BGIOSGA006817	-2.1113	-0.49665		BGIOSGA017460	1.1919	2.0143
BGIOSGA006846	-0.92184	-2.6371		BGIOSGA017468	1.0464	0.87441
BGIOSGA006891	-0.58643	-3.5161		BGIOSGA017477	0.7025	1.1227
BGIOSGA006907	-2.0561	-2.1102		BGIOSGA017483	1.0471	0.689
BGIOSGA006911	-1.0206	-1.9787		BGIOSGA017490	1.9088	0.93554
BGIOSGA006930	-0.74507	-1.3761		BGIOSGA017493	0.45925	1.0214
BGIOSGA006983	-0.059657	-1.8228		BGIOSGA017494	5.0887	4.212
BGIOSGA007049	-0.15274	-1.2044		BGIOSGA017727	4.4342	0.20467
BGIOSGA007082	-1.9355	-1.1065		BGIOSGA017730	2.0151	3.2587
BGIOSGA007161	-0.19884	-1.4176		BGIOSGA017731	1.4867	1.247
BGIOSGA007175	-3.4549	-3.4807		BGIOSGA017738	3.8577	1.3506
BGIOSGA007181	-0.21734	-1.4429		BGIOSGA017823	1.9975	1.2405
BGIOSGA007217	-1.7999	-0.50744		BGIOSGA017864	1.2749	1.0253
BGIOSGA007429	-0.78136	-1.3932		BGIOSGA017984	0.93594	1.7128
BGIOSGA007434	-2.0064	-2.2493		BGIOSGA017996	1.9535	2.7188
BGIOSGA007528	-0.37874	-1.9961		BGIOSGA018078	1.8361	0.33042
BGIOSGA007568	-0.96239	-4.3173		BGIOSGA018130	1.0381	0.61081
BGIOSGA007579	-0.17445	-1.4533		BGIOSGA018169	0.6062	1.183
BGIOSGA007596	-3.6359	-2.5223		BGIOSGA018202	0.81006	1.8954
BGIOSGA007605	-2.8513	-3.8083		BGIOSGA018214	2.0347	1.7713
BGIOSGA007669	-0.78785	-1.6713		BGIOSGA018236	1.6181	0.53849
BGIOSGA007717	-1.2638	-1.9916		BGIOSGA018242	1.289	1.6046
BGIOSGA007726	-0.55222	-2.8306		BGIOSGA018391	1.0215	-0.035828
BGIOSGA007732	-0.94511	-1.1153		BGIOSGA018537	0.52385	1.0324
BGIOSGA007926	-0.40392	-3.4356		BGIOSGA018546	1.6923	0.06272
BGIOSGA008018	-2.3404	-1.7853		BGIOSGA018678	0.81935	1.0537
BGIOSGA008055	-3.5112	-2.9253		BGIOSGA018714	1.4478	0.94445
BGIOSGA008063	-0.20551	-1.6654		BGIOSGA018735	0.40633	1.1964
BGIOSGA008090	-0.99707	-1.3409		BGIOSGA018787	1.4429	0.25237
BGIOSGA008104	-1.7295	-2.1206		BGIOSGA018883	1.9571	2.2857
BGIOSGA008122	-1.9465	-2.6923		BGIOSGA018890	0.60742	1.9312
BGIOSGA008174	-2.3673	-2.6004		BGIOSGA018911	1.3691	0.96833
BGIOSGA008194	-1.053	-1.3001		BGIOSGA018926	0.92538	1.3428
BGIOSGA008199	-0.63172	-2.0969		BGIOSGA018938	2.544	1.9902
BGIOSGA008212	-0.67119	-1.5214		BGIOSGA019002	0.65379	1.2596
BGIOSGA008288	-1.1549	-0.018772		BGIOSGA019027	1.5276	0.88476
BGIOSGA008300	-0.64647	-2.0748		BGIOSGA019039	1.4479	-0.0051017
BGIOSGA008302	-1.1726	0.049342		BGIOSGA019067	1.0672	0.8328
BGIOSGA008357	-3.5304	-1.7355		BGIOSGA019075	1.2614	1.8589
BGIOSGA008383	-2.881	-3.6391		BGIOSGA019094	0.5904	1.4749
BGIOSGA008385	-0.83342	-1.2882		BGIOSGA019131	1.4045	1.2588
BGIOSGA008502	-0.62771	-1.5924		BGIOSGA019146	2.0372	1.2924
BGIOSGA008524	-0.21944	-1.6026		BGIOSGA019148	0.52904	1.3219
BGIOSGA008546	-2.3205	-2.681		BGIOSGA019160	1.5763	1.2232
BGIOSGA008598	-0.41385	-3.2374		BGIOSGA019235	1.2841	0.73559
BGIOSGA008607	-0.94459	-1.225		BGIOSGA019259	0.81201	1.2971
BGIOSGA008609	-0.27536	-1.0223		BGIOSGA019282	0.84778	1.0444
BGIOSGA008619	-2.4697	-1.9355		BGIOSGA019328	1.0403	1.313
BGIOSGA008633	-1.0893	-0.13076		BGIOSGA019365	1.7738	1.195
BGIOSGA008650	-0.72471	-1.1177		BGIOSGA019378	1.1135	4.5265
BGIOSGA008660	-1.6811	-0.70799		BGIOSGA019397	0.7867	2.1354
BGIOSGA008665	-0.32363	-1.4165		BGIOSGA019408	1.1716	2.8765
BGIOSGA008689	-0.10441	-2.2102		BGIOSGA019450	0.28353	1.3624
BGIOSGA008704	-1.7452	-2.0116		BGIOSGA019479	7.931	2.3982
BGIOSGA008716	-1.8865	-2.5975		BGIOSGA019578	1.0488	0.4079
BGIOSGA008733	-2.3599	-1.4714		BGIOSGA019596	1.7259	1.046
BGIOSGA008780	-2.6251	-1.5224		BGIOSGA019635	0.60483	1.6403
BGIOSGA008785	-3.6875	-3.7682		BGIOSGA019650	0.54601	1.4913
BGIOSGA008799	-1.5715	-2.3355		BGIOSGA019672	0.76473	1.0127
BGIOSGA008802	-3.1933	-5.2268		BGIOSGA019694	5.431	0.11252
BGIOSGA008804	-5.2628	-5.7114		BGIOSGA019701	1.2472	-0.026384
BGIOSGA008823	-0.15114	-1.3621		BGIOSGA019907	1.8509	2.437
BGIOSGA008829	-0.96987	-1.2371		BGIOSGA020021	5.3158	0.38737
BGIOSGA008848	-0.88937	-1.4098		BGIOSGA020114	2.005	1.5472
BGIOSGA008867	-0.96882	-2.7702		BGIOSGA020149	1.1638	0.89377
BGIOSGA008868	-0.52545	-2.4601		BGIOSGA020188	1.8391	1.6717
BGIOSGA008883	-1.6775	-1.0948		BGIOSGA020318	4.6118	3.9538
BGIOSGA008885	-0.31277	-1.2557		BGIOSGA020357	0.72985	1.3518
BGIOSGA008911	-4.8369	-4.4908		BGIOSGA020437	0.2956	1.3321
BGIOSGA008945	-0.85059	-1.696		BGIOSGA020466	1.1911	1.5769
BGIOSGA008974	-0.20943	-2.1444		BGIOSGA020539	1.525	0.73821
BGIOSGA008996	-0.1725	-1.8346		BGIOSGA020546	0.81652	1.2838
BGIOSGA009019	-0.92159	-1.5422		BGIOSGA020552	2.931	0.14903
BGIOSGA009043	-2.3428	-1.0552		BGIOSGA020577	1.4078	1.6276
BGIOSGA009045	-1.601	-2.7613		BGIOSGA020682	0.3731	1.1185
BGIOSGA009078	-0.9089	-2.4207		BGIOSGA020688	1.4012	3.269
BGIOSGA009080	-2.4877	-1.1372		BGIOSGA020825	1.7084	1.5826
BGIOSGA009084	-0.86733	-3.0861		BGIOSGA020871	1.098	3.0682
BGIOSGA009086	-2.2702	-3.9871		BGIOSGA021064	3.2055	1.9023
BGIOSGA009114	-2.0256	-1.3139		BGIOSGA021069	0.44305	1.5776
BGIOSGA009117	-1.343	-2.7405		BGIOSGA021076	0.66754	2.6769
BGIOSGA009149	-2.2759	-2.523		BGIOSGA021078	1.8969	0.87777
BGIOSGA009178	-1.9814	-2.3885		BGIOSGA021154	1.3347	2.6777
BGIOSGA009181	-0.77609	-1.5526		BGIOSGA021180	1.6736	2.0094
BGIOSGA009184	-1.6265	-0.87184		BGIOSGA021377	1.9335	1.8741
BGIOSGA009210	-1.1251	-1.5616		BGIOSGA021416	2.504	1.8428
BGIOSGA009218	-0.377	-1.3522		BGIOSGA021439	1.0497	1.6428
BGIOSGA009227	-0.6734	-1.2272		BGIOSGA021485	1.0397	0.76189
BGIOSGA009230	-1.4394	-2.181		BGIOSGA021615	0.31977	1.3976
BGIOSGA009254	-0.26393	-1.6124		BGIOSGA021616	1.2556	1.2751
BGIOSGA009300	-0.93944	-1.3189		BGIOSGA021643	1.1698	0.59703
BGIOSGA009326	-0.67413	-4.5058		BGIOSGA021662	3.4084	1.8161
BGIOSGA009335	-0.65966	-1.1269		BGIOSGA021664	1.8575	1.2812
BGIOSGA009399	-4.0151	-1.9067		BGIOSGA021769	2.9346	3.8138
BGIOSGA009400	-3.8596	-2.1616		BGIOSGA021860	1.7184	2.8941
BGIOSGA009425	-2.1266	-1.6492		BGIOSGA021861	2.0721	0.46615
BGIOSGA009515	-1.6105	-3.8484		BGIOSGA021876	2.9233	1.4367
BGIOSGA009523	-5.5411	-1.8979		BGIOSGA021955	4.8002	1.0868
BGIOSGA009539	-0.70291	-1.8672		BGIOSGA021956	3.9819	1.1268
BGIOSGA009543	-2.6567	-1.8478		BGIOSGA021957	3.2003	0.30061
BGIOSGA009551	-0.88215	-2.453		BGIOSGA021980	4.2921	1.8659
BGIOSGA009555	-0.58639	-1.2777		BGIOSGA021999	1.4498	0.033567
BGIOSGA009564	-0.81283	-2.5857		BGIOSGA022078	1.4862	0.87641
BGIOSGA009565	-2.1351	-3.8472		BGIOSGA022084	1.9079	0.52824
BGIOSGA009607	-0.39631	-1.5405		BGIOSGA022244	2.2042	4.1599
BGIOSGA009641	-0.89531	-2.9553		BGIOSGA022272	1.2898	1.7644
BGIOSGA009739	-0.83747	-2.5361		BGIOSGA022523	0.65203	1.1772
BGIOSGA009741	-2.1201	-1.38		BGIOSGA022550	1.1115	0.46764
BGIOSGA009755	-3.0709	-3.0402		BGIOSGA022643	1.243	0.11942
BGIOSGA009765	-0.85016	-1.5895		BGIOSGA022659	2.0253	3.1273
BGIOSGA009766	-2.5948	-2.55		BGIOSGA022688	2.3481	0.37957
BGIOSGA009773	-1.3112	-2.8647		BGIOSGA022816	1.6335	0.23498
BGIOSGA009781	-0.97352	-1.7748		BGIOSGA022876	0.68772	1.2415
BGIOSGA009848	-0.30087	-1.4633		BGIOSGA022968	1.4647	0.56272
BGIOSGA009858	-3.3848	-3.4701		BGIOSGA023021	1.5516	1.9979
BGIOSGA009874	-1.3185	-3.3101		BGIOSGA023032	2.2935	2.1798
BGIOSGA009886	-2.6461	-3.5603		BGIOSGA023093	1.2262	0.91925
BGIOSGA009894	-3.3128	-3.7149		BGIOSGA023108	5.2254	3.5179
BGIOSGA009906	-1.2768	-0.28127		BGIOSGA023291	1.4934	2.6625
BGIOSGA009929	-1.3419	-3.1851		BGIOSGA023315	0.89229	1.0274
BGIOSGA009939	-0.54646	-1.8257		BGIOSGA023353	1.001	1.1627
BGIOSGA009948	-0.10498	-1.8035		BGIOSGA023362	1.2375	1.0003
BGIOSGA009963	-0.59336	-1.8516		BGIOSGA023470	1.2057	1.0554
BGIOSGA009965	-0.81744	-1.1334		BGIOSGA023499	0.89484	2.1708
BGIOSGA009984	-0.93223	-3.2857		BGIOSGA023530	1.6846	2.0045
BGIOSGA010087	-1.7694	-0.2036		BGIOSGA023563	1.3495	0.72806
BGIOSGA010092	-1.2463	-1.9434		BGIOSGA023591	0.85459	1.2799
BGIOSGA010094	-1.4494	-4.5506		BGIOSGA023594	0.9967	1.0486
BGIOSGA010095	-0.0874	-5.948		BGIOSGA023607	1.3964	-0.00099944
BGIOSGA010114	-1.5865	-2.0914		BGIOSGA023624	1.7591	1.4233
BGIOSGA010128	-0.10896	-1.1964		BGIOSGA023626	3.5635	2.764
BGIOSGA010171	-2.8972	-2.4489		BGIOSGA023633	2.7359	0.29717
BGIOSGA010175	-0.7855	-1.5769		BGIOSGA023664	3.2028	3.546
BGIOSGA010303	-1.0175	-1.6901		BGIOSGA023753	0.57984	1.4081
BGIOSGA010365	-0.40739	-2.0291		BGIOSGA023856	0.99704	1.0075
BGIOSGA010466	-0.6829	-1.3414		BGIOSGA023919	1.8265	1.208
BGIOSGA010468	-3.4031	-2.8866		BGIOSGA023934	1.5056	0.41341
BGIOSGA010483	-3.2686	-4.2729		BGIOSGA023967	1.0384	0.59392
BGIOSGA010552	-0.98408	-3.734		BGIOSGA024054	1.2277	0.78058
BGIOSGA010559	-1.3742	-2.3283		BGIOSGA024079	0.34938	1.2437
BGIOSGA010716	-1.4372	-4.4376		BGIOSGA024119	2.347	2.0816
BGIOSGA010761	-1.4671	-1.8295		BGIOSGA024167	1.1525	3.4457
BGIOSGA010773	-3.0946	-0.14682		BGIOSGA024194	2.7164	3.7429
BGIOSGA010774	-3.6367	-0.55834		BGIOSGA024240	3.1691	0.48722
BGIOSGA010801	-2.8674	-0.99137		BGIOSGA024281	1.074	0.052843
BGIOSGA010806	-0.72955	-1.8801		BGIOSGA024325	1.6902	2.3574
BGIOSGA010822	-0.41597	-2.0397		BGIOSGA024403	1.6507	1.3854
BGIOSGA010837	-0.8106	-2.1062		BGIOSGA024424	2.7576	1.2491
BGIOSGA010845	-0.39094	-1.7859		BGIOSGA024535	1.2332	1.1529
BGIOSGA010857	-2.217	-2.9697		BGIOSGA024571	1.938	0.69007
BGIOSGA010865	-1.6837	-2.3598		BGIOSGA024606	3.2581	1.7176
BGIOSGA010891	-0.19063	-1.8606		BGIOSGA024616	1.3101	1.0907
BGIOSGA010921	-1.6202	-3.5821		BGIOSGA024622	3.9432	4.2895
BGIOSGA010945	-1.8265	-4.0864		BGIOSGA024623	1.3021	0.85244
BGIOSGA010959	-1.7136	-2.2596		BGIOSGA024672	2.481	-0.080666
BGIOSGA010981	-0.3808	-1.395		BGIOSGA024763	0.68128	2.0297
BGIOSGA010984	-1.3659	-2.8326		BGIOSGA024808	1.7329	1.6395
BGIOSGA010995	-0.78503	-1.4554		BGIOSGA024825	1.7627	2.1343
BGIOSGA011015	-2.0774	-3.7891		BGIOSGA024866	1.9209	1.6727
BGIOSGA011032	-0.74813	-2.3214		BGIOSGA024867	0.577	1.2433
BGIOSGA011051	-0.78469	-1.6267		BGIOSGA025077	8.8413	5.4797
BGIOSGA011056	-0.79875	-1.4442		BGIOSGA025094	0.89424	3.4466
BGIOSGA011066	-1.7485	-2.2141		BGIOSGA025158	0.54227	1.9304
BGIOSGA011082	-2.7039	-4.0305		BGIOSGA025211	1.0039	1.1668
BGIOSGA011087	-0.81217	-1.3069		BGIOSGA025264	1.6676	1.2605
BGIOSGA011135	-1.8168	-4.059		BGIOSGA025296	1.3597	0.30161
BGIOSGA011140	-2.9215	-4.6646		BGIOSGA025316	1.2837	0.0066315
BGIOSGA011160	-1.6196	-1.4894		BGIOSGA025334	5.1961	5.0253
BGIOSGA011193	-2.0588	-0.65385		BGIOSGA025423	2.1596	3.1523
BGIOSGA011208	-2.9837	-1.9447		BGIOSGA025531	1.4447	1.7741
BGIOSGA011258	-1.8314	-1.0643		BGIOSGA025616	1.0971	0.83288
BGIOSGA011282	-0.98298	-3.0283		BGIOSGA025694	3.4882	3.3876
BGIOSGA011298	-2.3927	-2.1148		BGIOSGA025770	1.8951	1.4486
BGIOSGA011305	-2.1737	-4.2668		BGIOSGA025836	3.1384	1.0944
BGIOSGA011324	-2.5949	-1.7806		BGIOSGA025949	0.17643	1.3309
BGIOSGA011332	-4.8172	-3.6527		BGIOSGA026047	1.2834	1.0226
BGIOSGA011368	-0.65101	-1.1932		BGIOSGA026095	1.2277	0.69198
BGIOSGA011369	-2.3542	-1.5156		BGIOSGA026169	3.2268	1.4133
BGIOSGA011417	-1.4369	-0.26942		BGIOSGA026185	1.4514	0.93718
BGIOSGA011433	-3.1945	-3.2963		BGIOSGA026224	0.87281	1.6784
BGIOSGA011440	-0.7259	-1.2718		BGIOSGA026235	1.1671	2.005
BGIOSGA011441	-1.1786	-1.9687		BGIOSGA026304	3.768	3.0391
BGIOSGA011443	-2.8162	-0.099866		BGIOSGA026337	1.5144	2.0832
BGIOSGA011485	-0.14122	-1.4527		BGIOSGA026338	4.9158	2.0128
BGIOSGA011514	-2.9882	-1.6754		BGIOSGA026366	1.6864	1.1398
BGIOSGA011531	-2.4806	-2.5902		BGIOSGA026387	0.76359	2.1265
BGIOSGA011536	-1.2272	-1.0351		BGIOSGA026388	6.8353	4.7124
BGIOSGA011542	-2.7707	-3.999		BGIOSGA026389	3.8646	4.6493
BGIOSGA011548	-0.60919	-2.3605		BGIOSGA026390	2.5925	4.247
BGIOSGA011580	-0.60007	-2.6136		BGIOSGA026405	1.2313	1.3076
BGIOSGA011592	-0.39218	-1.3781		BGIOSGA026413	2.9669	1.577
BGIOSGA011605	-3.8393	-1.6762		BGIOSGA026439	1.464	0.52183
BGIOSGA011677	-2.6418	-2.6806		BGIOSGA026442	0.59329	1.018
BGIOSGA011686	-2.8808	-0.6201		BGIOSGA026495	1.2728	0.48559
BGIOSGA011715	-0.72341	-1.0977		BGIOSGA026530	2.1548	7.8296
BGIOSGA011747	-1.1798	-1.7082		BGIOSGA026538	1.3392	0.55409
BGIOSGA011750	-1.8777	-1.848		BGIOSGA026540	1.1624	0.32725
BGIOSGA011751	-0.83523	-1.5822		BGIOSGA026625	0.61985	1.7009
BGIOSGA011785	0.0062	-3.5206		BGIOSGA026643	1.4675	1.2865
BGIOSGA011826	-0.66335	-1.6693		BGIOSGA026677	1.6836	1.3547
BGIOSGA011829	-0.73177	-2.0474		BGIOSGA026706	0.94474	1.0809
BGIOSGA011873	-0.59455	-2.245		BGIOSGA026736	3.5577	2.0507
BGIOSGA011886	-0.15047	-2.2233		BGIOSGA026872	1.0117	0.75939
BGIOSGA011890	-2.1651	-5.4835		BGIOSGA026994	0.95376	1.4537
BGIOSGA011900	-1.4186	-3.518		BGIOSGA027085	1.5388	3.5158
BGIOSGA011908	-0.17841	-1.282		BGIOSGA027173	3.6801	1.7992
BGIOSGA011916	-0.51425	-3.2621		BGIOSGA027198	1.0276	1.2215
BGIOSGA011953	-0.45359	-1.3738		BGIOSGA027318	1.342	1.9097
BGIOSGA011969	-0.35322	-1.634		BGIOSGA027391	5.0767	4.7443
BGIOSGA011983	-2.104	-3.3138		BGIOSGA027394	2.1719	1.7509
BGIOSGA011988	-1.6324	-2.2498		BGIOSGA027464	1.0616	1.6727
BGIOSGA011998	-3.85	-0.80139		BGIOSGA027488	1.625	1.8617
BGIOSGA012010	-0.23448	-1.9656		BGIOSGA027635	0.91687	1.0848
BGIOSGA012011	-0.73288	-2.337		BGIOSGA027642	3.2878	2.4744
BGIOSGA012012	-0.84718	-1.7759		BGIOSGA027686	1.2901	0.26799
BGIOSGA012018	-2.6481	-3.5476		BGIOSGA027693	5.8767	3.7801
BGIOSGA012040	-1.4736	-3.9943		BGIOSGA027695	6.2953	4.0088
BGIOSGA012041	-2.2148	-2.0802		BGIOSGA027705	0.30342	1.211
BGIOSGA012069	-1.1389	-2.241		BGIOSGA027757	2.7262	0.25142
BGIOSGA012080	-2.2634	-3.6283		BGIOSGA027813	0.41582	1.1645
BGIOSGA012149	-0.37612	-2.5523		BGIOSGA027841	5.4568	1.4011
BGIOSGA012151	-1.0211	-2.8516		BGIOSGA027880	0.82136	3.3613
BGIOSGA012169	-2.0752	-1.7996		BGIOSGA027913	1.3004	0.84719
BGIOSGA012172	-0.72158	-2.9844		BGIOSGA027952	5.0273	3.5346
BGIOSGA012175	-0.25822	-2.2664		BGIOSGA028188	0.74766	2.3394
BGIOSGA012181	-2.3982	-2.9711		BGIOSGA028232	1.0327	0.68462
BGIOSGA012193	-0.41903	-2.7052		BGIOSGA028368	0.75484	1.2341
BGIOSGA012201	-0.95979	-1.5841		BGIOSGA028486	1.7342	0.062746
BGIOSGA012209	-2.0672	-2.6338		BGIOSGA028522	1.9439	1.6835
BGIOSGA012228	-3.1417	-1.9543		BGIOSGA028580	1.0003	1.7387
BGIOSGA012235	-1.0308	-2.935		BGIOSGA028621	1.0818	1.1123
BGIOSGA012256	-1.7988	-2.2739		BGIOSGA028686	0.4031	1.3168
BGIOSGA012278	-1.3517	-2.2339		BGIOSGA028700	1.3916	2.1818
BGIOSGA012293	-2.5042	-0.72227		BGIOSGA028709	6.98	2.1293
BGIOSGA012299	-0.14302	-1.9286		BGIOSGA028722	2.3722	-0.08483
BGIOSGA012326	-1.2509	-1.6699		BGIOSGA028780	1.0116	0.63611
BGIOSGA012333	-0.28768	-2.6604		BGIOSGA028861	1.1675	0.37901
BGIOSGA012338	-0.6594	-1.3375		BGIOSGA028887	1.2932	0.43532
BGIOSGA012357	-1.3178	-2.017		BGIOSGA028891	1.1321	1.3301
BGIOSGA012379	-0.88453	-1.2758		BGIOSGA028915	1.9454	0.71592
BGIOSGA012398	-2.3866	-2.2675		BGIOSGA028928	1.3429	0.61092
BGIOSGA012433	-1.1936	-3.0334		BGIOSGA028949	1.1144	0.7109
BGIOSGA012438	-2.4237	-1.7049		BGIOSGA028958	1.6504	1.2698
BGIOSGA012447	-2.1642	-2.6207		BGIOSGA028998	1.0935	1.2542
BGIOSGA012450	-3.2128	-3.084		BGIOSGA029009	2.8265	0.29898
BGIOSGA012464	-1.0811	-2.4353		BGIOSGA029025	1.2585	1.3635
BGIOSGA012485	-2.0415	-3.4151		BGIOSGA029174	0.34703	1.0656
BGIOSGA012498	-0.48268	-3.7877		BGIOSGA029341	3.1869	3.31
BGIOSGA012504	-0.8531	-4.6684		BGIOSGA029354	3.7875	6.8776
BGIOSGA012509	-0.90901	-4.5205		BGIOSGA029359	1.3344	-0.024528
BGIOSGA012521	-1.4118	-2.5454		BGIOSGA029374	1.2014	1.0662
BGIOSGA012568	-1.6554	-3.5645		BGIOSGA029400	1.0111	0.59667
BGIOSGA012571	-2.2034	-3.5547		BGIOSGA029410	0.61757	1.1062
BGIOSGA012597	-2.3109	-4.4864		BGIOSGA029473	0.70176	2.2822
BGIOSGA012598	-0.73001	-2.4363		BGIOSGA029493	1.0649	1.3685
BGIOSGA012628	-1.7722	-1.0757		BGIOSGA029497	1.7883	0.99173
BGIOSGA012664	-2.9289	-5.8123		BGIOSGA029506	1.0669	1.6661
BGIOSGA012686	-1.6938	-3.7895		BGIOSGA029583	0.73658	1.3433
BGIOSGA012703	-2.3771	-4.3332		BGIOSGA029613	0.38559	1.3648
BGIOSGA012707	-1.2065	-2.0936		BGIOSGA029629	1.4669	2.3023
BGIOSGA012711	-0.71485	-2.2824		BGIOSGA029726	1.0595	1.6757
BGIOSGA012779	-1.2212	-1.0334		BGIOSGA029756	1.9634	1.2636
BGIOSGA012823	-1.9693	-0.73277		BGIOSGA029771	1.9154	1.7945
BGIOSGA012883	-0.84851	-1.3182		BGIOSGA029778	7.9817	0.57603
BGIOSGA012915	-0.38183	-1.1468		BGIOSGA029790	1.786	0.17654
BGIOSGA013019	-1.6925	-1.0315		BGIOSGA029798	0.75776	1.78
BGIOSGA013214	-1.4646	-2.125		BGIOSGA029799	1.2796	1.4709
BGIOSGA013220	-1.3075	-4.6379		BGIOSGA029804	1.5296	1.4103
BGIOSGA013241	-2.0176	-1.8044		BGIOSGA029860	1.0687	1.173
BGIOSGA013314	-0.88349	-2.185		BGIOSGA029893	5.5789	1.8592
BGIOSGA013325	-4.4478	-2.801		BGIOSGA029907	0.39851	1.0566
BGIOSGA013348	-0.74991	-1.604		BGIOSGA029990	1.771	0.48821
BGIOSGA013391	-2.1287	-1.6556		BGIOSGA030012	1.1336	1.3961
BGIOSGA013412	-0.51704	-1.5307		BGIOSGA030039	2.061	1.2576
BGIOSGA013426	-2.3478	-3.3552		BGIOSGA030110	1.2902	1.735
BGIOSGA013465	-2.5589	-3.9864		BGIOSGA030140	1.3529	0.32925
BGIOSGA013479	-1.3391	-0.45388		BGIOSGA030166	1.5406	0.97647
BGIOSGA013482	-0.94224	-2.0594		BGIOSGA030202	2.3423	0.35346
BGIOSGA013486	-1.8781	-2.6808		BGIOSGA030237	1.1312	3.0972
BGIOSGA013493	-0.61667	-1.2461		BGIOSGA030292	5.3145	5.8923
BGIOSGA013495	-2.4957	-1.1418		BGIOSGA030354	0.88305	1.4376
BGIOSGA013520	-0.65848	-1.0913		BGIOSGA030372	0.313	1.3349
BGIOSGA013533	-3.7917	-3.0681		BGIOSGA030408	1.1106	1.4
BGIOSGA013535	-1.3858	-0.56059		BGIOSGA030409	4.5464	3.753
BGIOSGA013566	-1.0942	-1.7803		BGIOSGA030674	0.7761	1.2906
BGIOSGA013604	-1.198	-1.6158		BGIOSGA030789	0.66004	1.1365
BGIOSGA013620	-1.97	-1.5945		BGIOSGA030816	2.0204	0.42922
BGIOSGA013629	-2.2591	-1.9551		BGIOSGA030829	1.3192	0.38143
BGIOSGA013685	-0.53091	-1.5761		BGIOSGA030864	0.76373	1.04
BGIOSGA013690	-1.9338	-3.1038		BGIOSGA030883	0.34176	1.6384
BGIOSGA013692	-0.29902	-1.775		BGIOSGA030936	1.2177	1.8787
BGIOSGA013697	-1.8481	-2.6452		BGIOSGA030941	0.32548	1.6648
BGIOSGA013720	-1.51	0.028827		BGIOSGA031039	0.79852	2.2454
BGIOSGA013729	-1.0273	-0.022117		BGIOSGA031040	0.90468	1.1927
BGIOSGA013814	-1.7114	-2.157		BGIOSGA031062	0.44376	1.8437
BGIOSGA013831	-2.1666	-4.7801		BGIOSGA031095	0.4684	1.7637
BGIOSGA013832	-3.5288	-5.5894		BGIOSGA031100	1.4514	0.054276
BGIOSGA013882	-1.2225	-0.082575		BGIOSGA031231	1.2476	0.46528
BGIOSGA013990	-0.88342	-1.8261		BGIOSGA031245	0.19188	1.1155
BGIOSGA014038	-1.6037	-0.62804		BGIOSGA031250	0.537	1.0354
BGIOSGA014055	-2.7583	-2.9302		BGIOSGA031289	1.4866	0.51922
BGIOSGA014059	-2.9233	-1.8596		BGIOSGA031338	2.2886	1.6159
BGIOSGA014062	-0.12532	-1.8067		BGIOSGA031427	4.1273	4.1436
BGIOSGA014090	-1.4852	-4.1822		BGIOSGA031429	1.5332	0.96415
BGIOSGA014108	-1.9867	-2.5175		BGIOSGA031440	1.3294	0.8374
BGIOSGA014123	-0.33101	-2.3843		BGIOSGA031474	2.8592	3.1859
BGIOSGA014134	-2.8886	-1.6302		BGIOSGA031535	1.8898	0.21727
BGIOSGA014151	-1.7372	-0.15746		BGIOSGA031561	1.1649	1.7625
BGIOSGA014221	-0.25499	-1.0674		BGIOSGA031574	4.2441	5.2779
BGIOSGA014234	-1.4091	-1.6741		BGIOSGA031575	4.199	0.92944
BGIOSGA014248	-1.061	-2.3767		BGIOSGA031635	1.0495	1.7545
BGIOSGA014331	-0.60939	-2.3991		BGIOSGA031777	1.6021	1.8473
BGIOSGA014335	0.7981	-2.4053		BGIOSGA031802	3.1174	1.0936
BGIOSGA014354	-0.77236	-1.6358		BGIOSGA031806	11.526	9.2888
BGIOSGA014356	-0.080537	-2.0287		BGIOSGA031896	0.35248	1.1472
BGIOSGA014374	-1.0691	-0.25842		BGIOSGA031909	1.7571	0.40499
BGIOSGA014377	-0.893	-1.5389		BGIOSGA031936	1.7604	1.3308
BGIOSGA014378	-0.56566	-2.028		BGIOSGA032057	1.5634	0.94756
BGIOSGA014389	-0.91395	-2.0441		BGIOSGA032071	0.74488	1.0127
BGIOSGA014396	-1.3496	-2.115		BGIOSGA032247	1.121	0.32243
BGIOSGA014397	-1.2186	-1.837		BGIOSGA032264	1.6648	0.75097
BGIOSGA014403	-2.8754	-3.5907		BGIOSGA032265	2.1376	0.86689
BGIOSGA014408	-0.214	-1.4609		BGIOSGA032373	0.63267	1.064
BGIOSGA014422	-0.54884	-1.7681		BGIOSGA032599	5.1438	1.2222
BGIOSGA014439	-0.21352	-1.6657		BGIOSGA032686	2.2573	0.024241
BGIOSGA014451	-1.0113	-0.82768		BGIOSGA032733	1.0792	1.3747
BGIOSGA014487	-0.80404	-1.5904		BGIOSGA032792	1.0934	1.5261
BGIOSGA014498	-0.68947	-2.307		BGIOSGA032814	6.0601	2.6884
BGIOSGA014504	-0.64156	-2.1657		BGIOSGA032818	1.7898	0.53521
BGIOSGA014531	-5.6911	-3.7038		BGIOSGA033142	1.2749	1.2
BGIOSGA014536	-3.344	-0.83988		BGIOSGA033144	1.2392	1.2345
BGIOSGA014538	-3.2666	-3.2635		BGIOSGA033183	2.8683	1.7464
BGIOSGA014541	-3.0087	-3.6924		BGIOSGA033300	1.2188	1.1119
BGIOSGA014626	-1.2692	-2.8139		BGIOSGA033338	2.4272	0.58766
BGIOSGA014629	-0.28619	-1.7173		BGIOSGA033397	6.7887	6.7678
BGIOSGA014633	-2.7681	-2.2749		BGIOSGA033426	0.40312	1.4454
BGIOSGA014662	-2.7518	-1.4061		BGIOSGA033476	3.0468	2.6897
BGIOSGA014663	-0.49184	-1.5075		BGIOSGA033527	3.8967	4.168
BGIOSGA014673	-2.6533	-2.6578		BGIOSGA033574	1.8253	1.995
BGIOSGA014679	-0.67789	-1.1967		BGIOSGA033575	8.5944	3.412
BGIOSGA014710	-2.0857	-1.9127		BGIOSGA033638	1.8876	1.1069
BGIOSGA014719	-2.1054	-2.9165		BGIOSGA033688	3.0654	3.21
BGIOSGA014738	-0.6727	-2.4589		BGIOSGA033689	2.4369	3.097
BGIOSGA014746	-1.4777	-6.0842		BGIOSGA033833	1.7479	2.3855
BGIOSGA014800	-2.5329	-4.1663		BGIOSGA033928	2.3188	0.86094
BGIOSGA014817	-2.581	-3.6082		BGIOSGA034000	1.9179	2.6409
BGIOSGA014831	-0.68044	-1.2821		BGIOSGA034037	2.2935	2.69
BGIOSGA014839	-1.8843	-1.3703		BGIOSGA034046	1.2847	0.74724
BGIOSGA014842	-0.48113	-1.5051		BGIOSGA034071	1.0195	0.48869
BGIOSGA014934	-2.9048	-3.9081		BGIOSGA034101	2.2839	0.12461
BGIOSGA014945	-2.4893	-3.2227		BGIOSGA034103	3.5383	3.8122
BGIOSGA014947	-1.0573	-2.0454		BGIOSGA034166	1.1603	1.9686
BGIOSGA014954	-1.8317	-0.94929		BGIOSGA034207	2.1911	2.6826
BGIOSGA014964	-1.213	-1.3191		BGIOSGA034219	0.1871	1.0811
BGIOSGA014966	-1.2821	0.0099053		BGIOSGA034249	1.0771	1.6612
BGIOSGA014989	-0.41928	-2.2502		BGIOSGA034297	3.9927	3.1489
BGIOSGA014990	-1.3378	-2.9662		BGIOSGA034298	4.8628	3.5583
BGIOSGA015014	-3.8525	-2.2374		BGIOSGA034312	4.124	1.7127
BGIOSGA015029	-0.20474	-1.5497		BGIOSGA034434	0.44931	1.0902
BGIOSGA015072	-0.051865	-1.3603		BGIOSGA034500	1.2806	0.32761
BGIOSGA015122	-0.83384	-3.3723		BGIOSGA034502	1.3604	0.78836
BGIOSGA015129	-2.3751	-4.3864		BGIOSGA034606	0.89985	1.8101
BGIOSGA015205	-0.75765	-2.0254		BGIOSGA034632	1.4038	0.05981
BGIOSGA015511	-1.9806	-1.8273		BGIOSGA034640	1.2873	0.67966
BGIOSGA015521	-1.9362	-1.5613		BGIOSGA034654	1.0794	1.456
BGIOSGA015653	-0.16621	-2.7473		BGIOSGA034669	3.8337	0.56546
BGIOSGA015677	-4.606	-3.6766		BGIOSGA034680	4.1028	4.0296
BGIOSGA015687	-2.6153	-3.2835		BGIOSGA034712	2.1806	1.6292
BGIOSGA015737	-0.91478	-2.0453		BGIOSGA034730	3.2553	2.6282
BGIOSGA015855	-4.4451	-2.3668		BGIOSGA034765	1.4494	0.69237
BGIOSGA015864	-0.10237	-1.6723		BGIOSGA034792	1.1221	1.3237
BGIOSGA015955	-1.3287	-2.1927		BGIOSGA035008	1.9685	0.96296
BGIOSGA015960	-3.3258	-1.5788		BGIOSGA035025	1.3999	0.80426
BGIOSGA015961	-3.0939	-0.72532		BGIOSGA035273	2.8023	5.1489
BGIOSGA016012	-1.1643	-0.73133		BGIOSGA035301	1.1737	2.22
BGIOSGA016111	-1.384	-0.44457		BGIOSGA035352	0.72485	1.5432
BGIOSGA016214	-1.3484	-3.5882		BGIOSGA035354	0.97757	1.5407
BGIOSGA016287	-1.1152	-1.0753		BGIOSGA035438	1.0272	1.1126
BGIOSGA016354	-0.64636	-4.1067		BGIOSGA035673	2.6315	2.2823
BGIOSGA016358	-2.8633	-2.1258		BGIOSGA035717	3.9173	2.7669
BGIOSGA016388	-1.1392	-1.7506		BGIOSGA035719	6.2631	7.4375
BGIOSGA016419	-1.5917	-0.389		BGIOSGA035721	2.5969	2.7067
BGIOSGA016468	-0.69514	-1.7401		BGIOSGA035722	4.7224	2.5521
BGIOSGA016491	-3.5896	-2.7373		BGIOSGA035748	1.4156	0.32167
BGIOSGA016507	-0.17119	-2.5121		BGIOSGA035766	1.1419	0.48182
BGIOSGA016511	-0.71365	-3.0528		BGIOSGA035781	1.0419	0.86592
BGIOSGA016512	-0.32815	-1.009		BGIOSGA035805	2.1897	1.347
BGIOSGA016515	-3.3267	-4.0358		BGIOSGA035815	1.4894	1.449
BGIOSGA016521	-1.9938	-2.1455		BGIOSGA035818	2.5374	2.4684
BGIOSGA016600	-0.66313	-2.0132		BGIOSGA035827	1.3272	3.4701
BGIOSGA016624	-1.3574	-2.8226		BGIOSGA035840	0.63436	1.5501
BGIOSGA016651	-1.6873	-1.3763		BGIOSGA035845	2.1367	1.9535
BGIOSGA016656	-1.5165	-3.5223		BGIOSGA035880	0.63673	1.6546
BGIOSGA016666	-0.62905	-2.4215		BGIOSGA035884	0.63789	1.5083
BGIOSGA016668	-1.9945	-3.2623		BGIOSGA036005	1.13	1.8769
BGIOSGA016719	-0.98029	-1.5195		BGIOSGA036177	3.2753	4.6395
BGIOSGA016724	-1.6163	-0.70709		BGIOSGA036198	0.87171	1.023
BGIOSGA016731	-4.0912	-3.7723		BGIOSGA036214	3.3199	3.4091
BGIOSGA016734	-1.7513	-2.098		BGIOSGA036237	0.87405	1.6765
BGIOSGA016770	-2.2509	-0.64347		BGIOSGA036265	0.70884	1.1281
BGIOSGA016815	-0.52638	-1.1786		BGIOSGA036271	2.0879	0.57615
BGIOSGA016843	-0.33766	-2.8024		BGIOSGA036475	0.30395	1.3554
BGIOSGA016861	-1.3674	-2.6776		BGIOSGA036639	1.035	2.3969
BGIOSGA016863	-1.171	-2.1537		BGIOSGA036640	1.3762	0.38131
BGIOSGA016881	-0.32273	-1.0174		BGIOSGA036641	2.3069	1.4253
BGIOSGA016898	-2.7717	-1.2552		BGIOSGA036751	1.5154	2.28
BGIOSGA016903	-2.415	-0.79724		BGIOSGA036847	1.0516	1.1967
BGIOSGA016904	-0.31558	-2.6808		BGIOSGA036858	1.6746	1.7522
BGIOSGA016941	-0.36756	-3.4736		BGIOSGA036862	2.4793	2.4232
BGIOSGA016943	-0.85116	-2.8972		BGIOSGA036874	2.475	1.4177
BGIOSGA016946	-1.9526	-0.11887		BGIOSGA036880	3.1246	5.0677
BGIOSGA016947	-3.7539	-4.6974		BGIOSGA036907	0.39211	1.2599
BGIOSGA016950	-4.7294	-4.0301		BGIOSGA036982	0.9494	1.0233
BGIOSGA016969	-1.3715	-1.3533		BGIOSGA037012	0.62726	1.823
BGIOSGA016994	-1.1419	-1.2289		BGIOSGA037034	0.47805	1.1987
BGIOSGA016996	-2.4202	-3.7246		BGIOSGA037112	4.3216	-0.15862
BGIOSGA016998	-3.5882	-3.391		BGIOSGA037174	1.794	1.1091
BGIOSGA017009	-1.9156	-1.1562		BGIOSGA037179	2.9488	0.60847
BGIOSGA017040	-0.88877	-1.7602		BGIOSGA037180	1.1585	4.0196
BGIOSGA017062	-2.2113	-4.3803		BGIOSGA037230	0.69588	1.2646
BGIOSGA017063	-0.07696	-1.6115		BGIOSGA037304	2.2263	1.0799
BGIOSGA017088	-2.6928	-2.5844		BGIOSGA037323	2.2369	0.65235
BGIOSGA017163	-0.9182	-1.2773		BGIOSGA037466	1.5946	1.282
BGIOSGA017200	-1.6257	-2.821		BGIOSGA037524	1.1755	1.3523
BGIOSGA017219	-1.3831	-2.4774		BGIOSGA037569	1.8775	3.6921
BGIOSGA017269	-0.44448	-1.6985		BGIOSGA037573	2.4529	3.023
BGIOSGA017321	-3.5059	-2.8104		BGIOSGA037574	2.5056	3.2567
BGIOSGA017326	-3.1642	-6.641		BGIOSGA037592	0.9293	1.3038
BGIOSGA017327	-1.6513	-2.1466		BGIOSGA037610	1.238	0.12903
BGIOSGA017334	-0.83411	-1.7129		BGIOSGA037620	1.4117	2.0825
BGIOSGA017340	-0.77612	-2.3071		BGIOSGA037630	1.6792	0.58792
BGIOSGA017385	-3.5291	-2.1593		BGIOSGA037638	1.7121	2.2163
BGIOSGA017445	-0.79799	-1.1169		BGIOSGA037758	0.36219	1.051
BGIOSGA017462	-1.7017	-2.9208		BGIOSGA037773	0.17387	1.1554
BGIOSGA017475	-0.6867	-1.7884		BGIOSGA037886	1.0099	1.5199
BGIOSGA017479	-0.83303	-2.5918		BGIOSGA037984	1.9004	3.036
BGIOSGA017566	-0.26946	-2.6353		BGIOSGA038054	3.5654	4.9614
BGIOSGA017578	-0.33314	-1.1102		BGIOSGA038159	1.344	2.2128
BGIOSGA017588	-0.61699	-1.2569		BGIOSGA040088	2.0559	0.72961
BGIOSGA017601	-0.085261	-2.0635		BGIOSGA040512	1.1359	1.756
BGIOSGA017604	-3.2813	-3.3798		BGIOSGA040533	4.2682	1.3377
BGIOSGA017630	-2.888	-3.6704		BGIOSGA040600	2.7326	1.3814
BGIOSGA017631	-2.8959	-3.1661		BGIOSGA040637	0.62276	1.1234
BGIOSGA017646	-2.1085	-3.1881		Novel00060	1.129	0.42992
BGIOSGA017709	-1.8862	-2.8053		Novel00241	3.9853	0.24821
BGIOSGA017739	-0.073675	-1.1346		Novel00387	1.8211	3.0745
BGIOSGA017742	-1.1167	-2.3932		Novel00567	1.489	2.7118
BGIOSGA017796	-1.6919	-1.8668		Novel00606	1.6327	1.0999
BGIOSGA017797	-1.1836	-2.2304		Novel00614	2.3987	2.7892
BGIOSGA017804	-0.47431	-1.7261		Novel00746	1.3039	2.9364
BGIOSGA017812	-1.3187	-0.36316		Novel00975	2.5053	0.9402
BGIOSGA017834	-1.3073	-3.114		Novel01000	1.1091	5.9631
BGIOSGA017875	-1.3049	-1.9979		Novel01306	3.2234	2.122
BGIOSGA017878	-0.98225	-1.9698		Novel01523	1.8695	2.0454
BGIOSGA017883	-1.1452	-2.4344		Novel01536	1.3741	0.41671
BGIOSGA017885	-0.75957	-1.1751
BGIOSGA017916	-0.19959	-1.8469
BGIOSGA017925	0.11567	-2.9916
BGIOSGA017935	-0.57064	-2.2249
BGIOSGA017949	-2.0008	-2.3363
BGIOSGA017962	-2.5572	-2.7185
BGIOSGA017975	-1.9144	-3.2034
BGIOSGA017979	-0.099479	-1.4346
BGIOSGA017982	-2.8311	-3.3068
BGIOSGA018017	-1.3038	-1.1398
BGIOSGA018019	-0.075113	-1.5879
BGIOSGA018050	-0.4901	-1.1595
BGIOSGA018055	-0.64093	-1.5038
BGIOSGA018056	-1.0856	-0.68056
BGIOSGA018067	-0.91012	-1.4779
BGIOSGA018101	-1.0138	-2.0102
BGIOSGA018120	-1.415	-0.80524
BGIOSGA018153	-2.8674	-3.476
BGIOSGA018154	-2.7982	-3.1791
BGIOSGA018296	-1.3975	-3.966
BGIOSGA018321	-0.70274	-3.1932
BGIOSGA018414	-0.8422	-5.0006
BGIOSGA018556	-1.0028	-2.109
BGIOSGA018573	-0.88984	-1.5103
BGIOSGA018602	-0.60042	-3.1443
BGIOSGA018604	-2.4908	-3.4838
BGIOSGA018652	-1.6309	-0.81464
BGIOSGA018665	-0.42971	-4.0362
BGIOSGA018692	-3.4515	-3.6826
BGIOSGA018734	-0.82924	-2.2197
BGIOSGA018766	-2.321	-0.22572
BGIOSGA018851	-0.77141	-1.4149
BGIOSGA018863	-4.25	-5.4869
BGIOSGA018888	-0.31908	-1.1452
BGIOSGA018891	-2.9207	-2.8261
BGIOSGA018920	-0.85975	-2.0988
BGIOSGA018921	-1.9085	-2.8265
BGIOSGA018922	-2.5863	-3.8449
BGIOSGA018994	-0.68871	-2.1298
BGIOSGA019006	-3.8488	-0.76029
BGIOSGA019016	-3.6354	-1.4187
BGIOSGA019032	-1.9744	-1.8926
BGIOSGA019054	-3.6436	-2.2841
BGIOSGA019108	-2.1922	-2.6995
BGIOSGA019110	-0.62924	-2.548
BGIOSGA019112	-2.7427	-1.922
BGIOSGA019118	-0.92779	-1.4681
BGIOSGA019133	-1.8897	-2.7709
BGIOSGA019140	-0.39181	-1.167
BGIOSGA019177	-1.9331	-3.6134
BGIOSGA019178	-0.18739	-2.2353
BGIOSGA019236	-0.88974	-1.7729
BGIOSGA019276	-1.9839	-2.1987
BGIOSGA019277	-3.5338	-3.285
BGIOSGA019291	-2.427	-4.8732
BGIOSGA019292	-3.3204	-4.5711
BGIOSGA019503	-1.3166	-2.8345
BGIOSGA019586	-1.1106	-1.7248
BGIOSGA019612	-0.43401	-2.7601
BGIOSGA019700	-2.6766	-1.3112
BGIOSGA019777	-1.0627	-4.943
BGIOSGA019812	-0.46994	-2.0609
BGIOSGA019845	-0.55144	-2.201
BGIOSGA019863	-0.10119	-1.3604
BGIOSGA019903	-1.0315	-0.61209
BGIOSGA019909	-1.9092	-2.8418
BGIOSGA019932	-0.70542	-2.2406
BGIOSGA019942	-3.7641	-1.8727
BGIOSGA019945	-1.3533	-2.5191
BGIOSGA019962	-0.92239	-2.5202
BGIOSGA019976	-1.2211	-4.3129
BGIOSGA020048	-3.0761	-2.9797
BGIOSGA020093	-0.65754	-2.1406
BGIOSGA020105	-1.3922	-1.5952
BGIOSGA020106	-2.6212	-3.1516
BGIOSGA020107	-0.8194	-3.0964
BGIOSGA020118	-1.3406	-0.47872
BGIOSGA020147	-1.0219	0.043221
BGIOSGA020160	-2.1536	-2.6055
BGIOSGA020194	-1.6818	-1.9608
BGIOSGA020205	-0.34716	-1.0998
BGIOSGA020217	-3.0993	-3.8562
BGIOSGA020241	-4.5694	-5.8513
BGIOSGA020243	-3.0563	-1.321
BGIOSGA020305	-1.3667	-4.043
BGIOSGA020317	-2.0732	-0.27107
BGIOSGA020319	-0.80638	-2.5586
BGIOSGA020327	-0.27571	-2.5563
BGIOSGA020341	-1.1822	-2.2702
BGIOSGA020349	-0.62836	-1.8337
BGIOSGA020353	-8.9813	0.062708
BGIOSGA020354	-0.79506	-2.3016
BGIOSGA020360	-1.8725	-3.3372
BGIOSGA020384	-0.22797	-2.6912
BGIOSGA020442	-3.7807	-4.779
BGIOSGA020451	-0.71312	-4.7169
BGIOSGA020477	-1.8918	-3.7151
BGIOSGA020497	-1.0639	-1.184
BGIOSGA020525	-1.6279	-2.1492
BGIOSGA020543	-0.50273	-1.5849
BGIOSGA020609	-0.27175	-1.5925
BGIOSGA020610	-0.99208	-1.731
BGIOSGA020616	-2.4181	-0.79696
BGIOSGA020631	-0.41309	-2.1597
BGIOSGA020641	-1.77	-2.558
BGIOSGA020684	-1.9142	-0.9251
BGIOSGA020720	-0.63582	-1.1466
BGIOSGA020732	-0.58195	-1.9691
BGIOSGA020773	-1.406	-3.0801
BGIOSGA020778	-3.4454	-2.5781
BGIOSGA020785	-0.86621	-1.2675
BGIOSGA020815	-0.58473	-1.622
BGIOSGA020819	-1.7681	-1.3754
BGIOSGA020918	-3.955	-1.2778
BGIOSGA020921	-0.72137	-2.2581
BGIOSGA020926	-0.27861	-2.9839
BGIOSGA020960	-1.4337	-4.2448
BGIOSGA021047	-2.1263	-1.5771
BGIOSGA021067	-2.1073	-3.7847
BGIOSGA021272	-1.572	-0.67733
BGIOSGA021288	-3.1718	-2.1824
BGIOSGA021344	-1.408	-3.7023
BGIOSGA021426	-1.504	-2.0474
BGIOSGA021470	-6.5747	-2.362
BGIOSGA021502	-0.3206	-1.5662
BGIOSGA021514	-1.8206	-2.3051
BGIOSGA021518	-1.4691	-2.376
BGIOSGA021541	-1.1651	-0.52387
BGIOSGA021621	-1.5531	-2.5365
BGIOSGA021685	-0.81137	-2.9026
BGIOSGA021708	-2.5833	-2.4325
BGIOSGA021736	-1.2801	-0.66658
BGIOSGA021766	-3.6125	-3.9048
BGIOSGA021767	-2.9434	-4.0023
BGIOSGA022000	-4.5281	-4.5536
BGIOSGA022007	-1.6467	-0.85152
BGIOSGA022008	-0.7468	-1.4642
BGIOSGA022017	-3.8589	-2.9017
BGIOSGA022083	-1.2755	-1.0453
BGIOSGA022162	-1.3812	-2.229
BGIOSGA022219	-6.1436	-5.4716
BGIOSGA022242	-2.2239	-3.3297
BGIOSGA022243	-3.1338	-2.7178
BGIOSGA022269	-0.27882	-1.8977
BGIOSGA022278	-0.47587	-1.5895
BGIOSGA022302	-1.8419	-5.6675
BGIOSGA022355	-1.6212	-4.8165
BGIOSGA022375	-1.8621	-2.1035
BGIOSGA022381	-0.4071	-1.906
BGIOSGA022384	-1.1763	-1.3792
BGIOSGA022398	-1.9361	-1.3129
BGIOSGA022424	-0.44017	-1.6946
BGIOSGA022460	-2.3089	-1.7077
BGIOSGA022468	-1.3462	-0.96137
BGIOSGA022502	-1.8117	-2.6965
BGIOSGA022531	-0.15064	-2.8487
BGIOSGA022534	-2.142	-3.9376
BGIOSGA022549	-0.31215	-1.7548
BGIOSGA022551	-2.1228	-2.7977
BGIOSGA022562	-1.6907	-2.5271
BGIOSGA022582	-0.51526	-1.4123
BGIOSGA022607	-2.7347	-3.3973
BGIOSGA022608	-1.8048	-4.8051
BGIOSGA022609	-3.3695	-0.68896
BGIOSGA022627	-3.1287	-4.5225
BGIOSGA022640	-1.345	-1.7599
BGIOSGA022642	-0.78999	-1.2258
BGIOSGA022703	-0.67849	-1.693
BGIOSGA022812	-0.33921	-1.3341
BGIOSGA022985	-0.98523	-2.0217
BGIOSGA023017	-0.7764	-1.0242
BGIOSGA023082	-0.77899	-1.5087
BGIOSGA023104	-0.15351	-1.1774
BGIOSGA023192	-2.4897	-1.3986
BGIOSGA023210	-1.3434	-1.664
BGIOSGA023222	-1.42	-2.0203
BGIOSGA023264	-1.3855	-0.7082
BGIOSGA023279	-2.1969	-5.8936
BGIOSGA023318	-1.5519	-1.2838
BGIOSGA023323	-1.3259	-5.0728
BGIOSGA023363	-1.5141	-1.7135
BGIOSGA023376	-1.1951	-1.7061
BGIOSGA023378	-1.1835	-0.75325
BGIOSGA023429	-1.414	-1.5996
BGIOSGA023482	-3.5079	-3.2156
BGIOSGA023514	-0.24993	-2.0002
BGIOSGA023544	-1.3297	-0.65033
BGIOSGA023579	-0.54607	-1.3575
BGIOSGA023606	-0.11633	-1.7657
BGIOSGA023617	-1.5284	-2.9364
BGIOSGA023631	-0.33399	-3.6175
BGIOSGA023647	-1.4984	-1.9368
BGIOSGA023660	-1.4706	-2.1283
BGIOSGA023694	-1.0353	-1.8242
BGIOSGA023704	-4.3022	-4.3797
BGIOSGA023739	-0.84504	-1.9664
BGIOSGA023812	-1.7997	-2.1803
BGIOSGA023979	-2.1909	-3.2038
BGIOSGA023995	-1.6056	-2.0546
BGIOSGA024059	-1.868	-2.7742
BGIOSGA024062	-1.4536	-2.3362
BGIOSGA024088	-2.1477	-2.4422
BGIOSGA024093	-0.21864	-1.1836
BGIOSGA024113	-0.43987	-1.2923
BGIOSGA024117	-0.25267	-2.9637
BGIOSGA024123	-2.312	-3.9279
BGIOSGA024163	-4.6908	-1.0843
BGIOSGA024200	-1.519	-1.5142
BGIOSGA024225	-1.3368	-1.4078
BGIOSGA024382	-0.55071	-1.6128
BGIOSGA024385	-0.75793	-1.0953
BGIOSGA024414	-7.8809	-5.5455
BGIOSGA024479	-1.2186	-0.62683
BGIOSGA024671	-1.2986	-2.0391
BGIOSGA024730	-1.6495	-1.4752
BGIOSGA024765	-0.57624	-2.8141
BGIOSGA024775	-1.3796	-2.1973
BGIOSGA024789	-1.5772	-0.25875
BGIOSGA024807	-3.7295	-3.1811
BGIOSGA024842	-4.3354	-4.1546
BGIOSGA024843	-2.7897	-3.1301
BGIOSGA024897	-1.3113	-1.9115
BGIOSGA025003	-2.8487	-2.283
BGIOSGA025004	-1.0867	-5.6087
BGIOSGA025043	-2.5287	0.04095
BGIOSGA025076	-0.9337	-1.4676
BGIOSGA025169	-2.5736	-4.8438
BGIOSGA025203	-1.1789	-3.0207
BGIOSGA025204	-1.2406	-3.1387
BGIOSGA025242	-0.69074	-1.0972
BGIOSGA025321	-1.6002	-2.7761
BGIOSGA025410	-1.1785	-2.5947
BGIOSGA025476	-1.2921	-1.278
BGIOSGA025494	-2.5146	-1.4816
BGIOSGA025495	-2.464	-1.8027
BGIOSGA025609	-0.47508	-3.5657
BGIOSGA025669	-0.731	-2.28
BGIOSGA025671	-2.1276	-0.83776
BGIOSGA025711	-1.0073	-6.1246
BGIOSGA025854	-4.8765	-5.1058
BGIOSGA025873	-0.1724	-2.2465
BGIOSGA025874	-1.3695	-2.2764
BGIOSGA025877	-0.46909	-2.6011
BGIOSGA025878	-0.54855	-2.1139
BGIOSGA025902	-1.8923	-3.6994
BGIOSGA025915	-0.93085	-1.0913
BGIOSGA025925	-3.5693	-3.1164
BGIOSGA025958	-4.5286	-4.1412
BGIOSGA025973	-0.63931	-1.8858
BGIOSGA025989	-1.1886	-1.8859
BGIOSGA026014	-2.2541	-2.1243
BGIOSGA026022	-2.0792	-3.4957
BGIOSGA026025	-0.20862	-2.4214
BGIOSGA026032	-0.2707	-1.3404
BGIOSGA026040	-2.0497	-2.1745
BGIOSGA026049	-3.057	-1.4371
BGIOSGA026092	-0.83779	-2.0269
BGIOSGA026104	-1.0498	-1.126
BGIOSGA026150	-1.0219	-0.40835
BGIOSGA026212	-2.193	-4.8295
BGIOSGA026219	-1.0136	-1.4867
BGIOSGA026226	-0.47122	-1.3361
BGIOSGA026248	-0.81765	-1.5982
BGIOSGA026253	-0.44668	-3.6233
BGIOSGA026378	-2.4188	-1.001
BGIOSGA026398	-1.2704	-2.1717
BGIOSGA026401	-1.2538	-1.8837
BGIOSGA026476	-0.66251	-1.8898
BGIOSGA026494	-1.3458	-2.4914
BGIOSGA026527	-0.1231	-1.6625
BGIOSGA026547	-0.20852	-1.959
BGIOSGA026548	-1.2471	-0.66709
BGIOSGA026567	-1.4862	-3.5037
BGIOSGA026627	-0.55327	-1.9068
BGIOSGA026654	-1.6845	-3.2426
BGIOSGA026697	-0.71762	-1.2428
BGIOSGA026749	-1.5327	-2.474
BGIOSGA026750	-0.13201	-1.2966
BGIOSGA026770	-1.4494	-0.54557
BGIOSGA026785	-0.49666	-2.045
BGIOSGA026786	-2.6227	-3.9185
BGIOSGA026800	-1.7644	-2.3955
BGIOSGA026808	-0.54863	-3.9687
BGIOSGA026823	-1.5261	-0.51015
BGIOSGA026849	-0.49576	-3.8069
BGIOSGA026853	-4.8632	-0.77064
BGIOSGA026879	-2.5335	-2.9149
BGIOSGA026897	-0.93846	-1.3248
BGIOSGA026976	-1.599	-1.0571
BGIOSGA026977	-0.36621	-2.159
BGIOSGA027012	-2.3869	-2.9665
BGIOSGA027020	-0.68664	-1.8699
BGIOSGA027045	-0.80106	-2.1399
BGIOSGA027060	-2.0126	-3.681
BGIOSGA027247	-1.6426	-1.035
BGIOSGA027346	-1.1916	-1.7826
BGIOSGA027404	-1.0295	-2.7694
BGIOSGA027576	-0.92228	-3.8468
BGIOSGA027623	-0.64014	-1.002
BGIOSGA027715	-0.52751	-2.1803
BGIOSGA027772	-2.0593	-1.7858
BGIOSGA027773	-1.5957	-2.0069
BGIOSGA027778	-2.1535	-2.5094
BGIOSGA027782	-3.1784	-3.8661
BGIOSGA027860	-1.367	-3.602
BGIOSGA027863	-0.68109	-1.6812
BGIOSGA027874	-4.3597	-0.27675
BGIOSGA027959	-2.7956	-5.3334
BGIOSGA027960	-2.256	-4.6319
BGIOSGA027961	-1.8509	-3.6282
BGIOSGA027972	-1.7405	-3.3357
BGIOSGA028020	-1.124	-2.2724
BGIOSGA028181	-2.3353	-3.438
BGIOSGA028217	-0.39296	-1.7108
BGIOSGA028253	-0.86937	-2.9482
BGIOSGA028273	-0.40307	-2.2822
BGIOSGA028310	-0.32296	-2.0281
BGIOSGA028549	-0.3902	-2.8981
BGIOSGA028631	-2.9101	-3.1978
BGIOSGA028649	-0.26398	-1.4361
BGIOSGA028650	-1.2196	-0.40986
BGIOSGA028653	-0.92734	-2.1656
BGIOSGA028658	-1.6634	-1.4055
BGIOSGA028663	-1.1376	-2.7122
BGIOSGA028703	-0.38829	-1.7227
BGIOSGA028741	-1.2945	-0.037577
BGIOSGA028755	-4.2381	-4.7721
BGIOSGA028759	-2.8792	-4.0259
BGIOSGA028779	-1.6193	-1.7271
BGIOSGA028838	-4.2467	-4.1869
BGIOSGA028878	-1.4111	-0.31932
BGIOSGA028888	-0.5859	-1.177
BGIOSGA028889	-0.96294	-1.7585
BGIOSGA028901	-0.4791	-1.6053
BGIOSGA028955	-1.3747	-2.1089
BGIOSGA029015	-2.7624	-3.7004
BGIOSGA029074	0.0729	-3.0843
BGIOSGA029097	-1.1779	-2.2796
BGIOSGA029184	-2.1445	-3.12
BGIOSGA029191	-1.0753	-0.47423
BGIOSGA029200	-1.6712	-0.11766
BGIOSGA029226	-0.17933	-2.1534
BGIOSGA029234	-1.2394	-3.0259
BGIOSGA029255	-3.1517	-3.5628
BGIOSGA029256	-2.4751	-2.7942
BGIOSGA029283	-1.3155	-1.569
BGIOSGA029284	-1.0595	-1.9965
BGIOSGA029294	-1.0461	-2.2356
BGIOSGA029338	-0.41704	-3.0635
BGIOSGA029369	-0.74614	-1.5456
BGIOSGA029376	-1.7156	-2.9944
BGIOSGA029396	-0.23162	-1.4396
BGIOSGA029403	-0.12692	-1.6896
BGIOSGA029415	-2.211	-2.4157
BGIOSGA029416	-5.0236	-3.5556
BGIOSGA029417	-6.1698	-4.0826
BGIOSGA029463	-1.0756	0.0047392
BGIOSGA029566	-4.3852	-2.5076
BGIOSGA029581	-1.6925	-1.7321
BGIOSGA029591	-0.51044	-2.1051
BGIOSGA029604	-1.4853	-1.6662
BGIOSGA029609	-2.3116	-1.785
BGIOSGA029649	-0.26924	-1.4748
BGIOSGA029652	-1.5764	-3.32
BGIOSGA029692	-3.3946	-4.6379
BGIOSGA029772	-3.2596	-1.3725
BGIOSGA029796	-0.59945	-1.196
BGIOSGA029797	-1.8963	-3.0603
BGIOSGA029809	-0.31235	-1.8992
BGIOSGA029810	-2.4125	-2.4945
BGIOSGA029832	-2.9552	-3.4969
BGIOSGA029852	-1.3331	-1.5519
BGIOSGA029896	-1.4703	-1.2349
BGIOSGA029947	-5.1844	-2.8637
BGIOSGA029949	-2.8663	-4.567
BGIOSGA029950	-5.2875	-3.0847
BGIOSGA029951	-5.2379	-3.4189
BGIOSGA030182	-1.3949	-1.9481
BGIOSGA030195	-1.3996	-1.0898
BGIOSGA030245	-1.5208	-1.2301
BGIOSGA030307	-2.3873	-3.3253
BGIOSGA030346	-0.71052	-3.5557
BGIOSGA030364	-1.2903	-2.2666
BGIOSGA030607	-0.64721	-2.8609
BGIOSGA030626	-3.6161	-3.7442
BGIOSGA030660	-1.5205	-2.4263
BGIOSGA030727	-2.1216	-3.7438
BGIOSGA030738	-1.2584	-2.4297
BGIOSGA030739	-1.7591	-2.5487
BGIOSGA030741	-0.5914	-1.2334
BGIOSGA030791	-2.2055	-2.7317
BGIOSGA030831	-0.19605	-1.3263
BGIOSGA030854	-0.90634	-1.7733
BGIOSGA030892	-0.56121	-3.522
BGIOSGA030895	-0.094449	-2.2154
BGIOSGA030896	-0.99579	-2.9525
BGIOSGA030902	-0.96332	-2.2125
BGIOSGA030907	-7.5872	-6.7716
BGIOSGA030945	-0.62221	-2.836
BGIOSGA030958	-0.73046	-1.2481
BGIOSGA030974	-2.2835	-2.7206
BGIOSGA030985	-1.733	-1.8671
BGIOSGA030989	-1.9465	-3.7237
BGIOSGA030999	-1.1719	-2.5988
BGIOSGA031000	-1.2149	-2.8017
BGIOSGA031004	-1.8805	-2.2394
BGIOSGA031005	-1.2349	-2.0595
BGIOSGA031012	-0.777	-1.8075
BGIOSGA031075	-4.7366	-3.8628
BGIOSGA031076	-3.5954	-3.1186
BGIOSGA031099	-0.60575	-4.1181
BGIOSGA031183	-3.1059	-3.3105
BGIOSGA031184	-0.24491	-1.5452
BGIOSGA031185	-1.0389	-1.7167
BGIOSGA031243	-0.79813	-1.6324
BGIOSGA031256	-0.86549	-3.0755
BGIOSGA031347	-1.1765	-1.2153
BGIOSGA031390	-2.5057	-2.8548
BGIOSGA031490	-1.8057	-3.2714
BGIOSGA031515	-0.094815	-1.9459
BGIOSGA031524	-0.24289	-1.2885
BGIOSGA031544	-0.83049	-1.3848
BGIOSGA031551	-3.8248	-2.4775
BGIOSGA031572	-1.4116	-3.1104
BGIOSGA031606	-1.1847	-2.2494
BGIOSGA031671	-2.2584	-3.6957
BGIOSGA031688	-1.725	-1.9466
BGIOSGA031695	-0.13921	-1.6733
BGIOSGA031737	-4.0837	-5.5071
BGIOSGA031783	-4.6451	-3.93
BGIOSGA031784	-3.0257	-3.0668
BGIOSGA031785	-4.5491	-3.2203
BGIOSGA031786	-3.2076	-3.9924
BGIOSGA031787	-5.8929	-4.8973
BGIOSGA031788	-2.8196	-4.474
BGIOSGA031793	-2.3146	-3.6606
BGIOSGA031796	-2.3232	-2.8749
BGIOSGA031801	-1.4977	-1.8826
BGIOSGA031846	-0.74422	-4.2567
BGIOSGA031910	-0.30054	-2.5325
BGIOSGA031915	-1.3256	-3.8748
BGIOSGA031973	-6.0758	-6.7218
BGIOSGA031997	-1.3921	-2.073
BGIOSGA032002	-3.4843	-3.0054
BGIOSGA032080	-0.074592	-1.7943
BGIOSGA032104	-1.3051	-2.7585
BGIOSGA032160	-2.3663	-0.57202
BGIOSGA032167	-7.4589	-1.8921
BGIOSGA032186	-3.0301	-2.7761
BGIOSGA032257	-0.98918	-1.9658
BGIOSGA032288	-1.5566	-1.7594
BGIOSGA032385	-0.30192	-1.762
BGIOSGA032395	-4.0609	-2.8926
BGIOSGA032462	-1.044	-2.0217
BGIOSGA032529	-1.3813	-1.2504
BGIOSGA032683	-0.39879	-2.6741
BGIOSGA032695	-1.3381	-4.1707
BGIOSGA032777	-1.598	-0.31157
BGIOSGA032869	-6.2301	-8.7639
BGIOSGA033025	-0.53991	-1.3032
BGIOSGA033066	-3.2629	-2.9766
BGIOSGA033067	-1.9566	-1.8134
BGIOSGA033070	-1.6795	-2.523
BGIOSGA033104	-0.070088	-1.7245
BGIOSGA033178	-1.7799	-1.8811
BGIOSGA033181	-2.6	-2.3507
BGIOSGA033188	-1.1714	-1.8853
BGIOSGA033209	-2.9431	-3.4111
BGIOSGA033216	-2.335	-2.268
BGIOSGA033254	-0.74596	-1.3979
BGIOSGA033262	-0.32077	-1.278
BGIOSGA033275	-2.2771	-4.099
BGIOSGA033288	-1.8001	-3.8207
BGIOSGA033294	-0.3485	-2.8442
BGIOSGA033296	-3.0221	-2.292
BGIOSGA033314	-1.3269	-5.8473
BGIOSGA033316	-0.91374	-4.5558
BGIOSGA033357	-0.40816	-1.3648
BGIOSGA033360	-1.6492	-1.1913
BGIOSGA033364	-0.44141	-2.1153
BGIOSGA033384	-1.8115	-1.6375
BGIOSGA033385	-0.79801	-2.3294
BGIOSGA033386	-0.09342	-2.3536
BGIOSGA033406	-5.6159	-2.0849
BGIOSGA033423	-0.42204	-1.2277
BGIOSGA033425	-1.9422	-2.4756
BGIOSGA033493	-0.092	-3.4098
BGIOSGA033500	-0.79523	-1.8171
BGIOSGA033519	-0.479	-2.3259
BGIOSGA033522	-0.8183	-2.099
BGIOSGA033532	-3.4892	-1.84
BGIOSGA033581	-1.3386	-2.1616
BGIOSGA033582	-1.115	-3.2132
BGIOSGA033659	-2.5865	-2.2302
BGIOSGA033691	-0.75796	-1.5357
BGIOSGA033715	-2.1756	-2.0476
BGIOSGA033774	-3.1233	-3.0813
BGIOSGA033858	-0.67309	-2.3368
BGIOSGA033947	-1.0372	-4.4087
BGIOSGA034262	-0.90188	-1.9009
BGIOSGA034264	-0.95959	-2.9726
BGIOSGA034292	-1.9461	-3.2341
BGIOSGA034294	-1.9947	-3.3432
BGIOSGA034313	-3.3656	-3.4759
BGIOSGA034327	-3.3738	-4.2568
BGIOSGA034377	-0.53901	-1.7236
BGIOSGA034421	-3.8878	-0.58181
BGIOSGA034478	-0.53662	-3.0301
BGIOSGA034481	-0.8802	-2.3935
BGIOSGA034486	-3.8047	-3.2401
BGIOSGA034501	-0.46809	-1.8029
BGIOSGA034528	-0.5075	-2.1538
BGIOSGA034563	-0.21453	-1.795
BGIOSGA034616	-1.0484	-3.3409
BGIOSGA034677	-2.4544	-3.82
BGIOSGA034703	-1.7668	-0.44632
BGIOSGA034713	-0.55292	-2.1225
BGIOSGA034766	-1.3321	-3.2787
BGIOSGA034784	-1.7499	-2.0816
BGIOSGA034796	-1.7306	-0.91266
BGIOSGA034863	-1.2493	-2.597
BGIOSGA034993	-0.54926	-1.1475
BGIOSGA035037	-2.0298	-1.1086
BGIOSGA035038	-1.509	-2.6207
BGIOSGA035077	-1.4646	-2.3096
BGIOSGA035192	-7.9108	-2.8514
BGIOSGA035193	-7.8413	-3.2716
BGIOSGA035267	-1.5878	-1.5448
BGIOSGA035351	-0.35084	-1.8958
BGIOSGA035439	-1.2125	-2.7502
BGIOSGA035519	-0.48479	-1.7094
BGIOSGA035597	-2.8175	-1.3954
BGIOSGA035667	-3.7065	-4.5393
BGIOSGA035695	-5.0618	-4.0449
BGIOSGA035749	-1.0765	-0.78026
BGIOSGA035751	-0.087557	-2.1522
BGIOSGA035913	-1.02	-0.09426
BGIOSGA035923	-1.0982	-0.30303
BGIOSGA035930	-0.7208	-2.324
BGIOSGA035933	-1.69	-2.6512
BGIOSGA035984	-0.64005	-2.9171
BGIOSGA036037	-0.43988	-1.5372
BGIOSGA036038	-0.19708	-1.3386
BGIOSGA036047	-1.0481	-1.9318
BGIOSGA036115	-4.6686	-3.7818
BGIOSGA036141	-0.7728	-1.6695
BGIOSGA036201	-0.74785	-4.3076
BGIOSGA036246	-1.2419	-3.2071
BGIOSGA036403	-1.6571	-1.9192
BGIOSGA036440	-1.231	-1.6096
BGIOSGA036472	-0.17437	-4.6315
BGIOSGA036516	-3.0423	-2.9115
BGIOSGA036544	-1.4221	-2.8927
BGIOSGA036550	-2.4958	-2.0826
BGIOSGA036581	-0.71299	-1.4216
BGIOSGA036589	-1.7995	-0.96252
BGIOSGA036593	-1.4147	-2.1087
BGIOSGA036607	-1.7469	-5.7046
BGIOSGA036608	-3.0243	-6.0282
BGIOSGA036609	-0.78672	-5.4609
BGIOSGA036628	-3.6898	-3.1678
BGIOSGA036663	-0.36413	-2.1549
BGIOSGA036685	-0.16402	-1.8374
BGIOSGA036760	-0.87758	-2.8792
BGIOSGA036832	-2.4356	-2.1883
BGIOSGA036833	-1.3917	-0.6907
BGIOSGA036836	-1.9807	-2.995
BGIOSGA036920	-0.98872	-2.3836
BGIOSGA037048	-1.1532	-2.3455
BGIOSGA037049	-1.4354	-2.7323
BGIOSGA037101	-2.9279	-3.6422
BGIOSGA037241	-1.6008	-5.351
BGIOSGA037252	-1.2991	-0.1096
BGIOSGA037315	-2.1495	-0.79532
BGIOSGA037345	-1.3247	-3.2945
BGIOSGA037385	-4.4282	-4.0156
BGIOSGA037460	-1.3022	-1.9018
BGIOSGA037577	-0.97966	-2.0376
BGIOSGA037633	-2.2194	-2.5988
BGIOSGA037688	-0.35676	-1.0502
BGIOSGA037746	-0.65698	-4.1456
BGIOSGA037853	-2.6187	-3.1936
BGIOSGA037854	-1.0014	-0.19051
BGIOSGA037902	-0.46345	-1.8312
BGIOSGA037907	-1.5017	-2.8122
BGIOSGA038033	-3.7845	-4.8066
BGIOSGA038064	-3.6055	-0.49056
BGIOSGA038333	-2.9657	-3.6679
BGIOSGA040489	-2.1516	-2.6493
BGIOSGA040604	-2.7853	-3.5823
BGIOSGA040642	-3.961	-3.6474
BGIOSGA040675	-0.9763	-1.7178
Novel00073	-0.84731	-2.0376
Novel00191	-1.0529	-2.3791
Novel00213	-0.62731	-1.5191
Novel00256	-0.52281	-2.5847
Novel00259	-1.2033	-0.63932
Novel00274	-0.31868	-1.228
Novel00282	-1.9462	-0.67048
Novel00336	-1.9151	-1.404
Novel00368	-3.6387	-3.9741
Novel00375	-1.2078	-0.19282
Novel00403	-1.6305	-0.83918
Novel00470	-1.859	-2.3107
Novel00488	-1.115	-1.0263
Novel00605	-2.8017	-1.4001
Novel00619	-5.2509	-4.7545
Novel00647	-1.1278	-0.80829
Novel00652	-1.7266	-1.3341
Novel00713	-2.7579	-1.2048
Novel00756	-4.4442	-3.5939
Novel00927	-1.1623	-2.6713
Novel01095	-4.093	-0.51863
Novel01177	-1.0701	-2.409
Novel01249	-2.9399	-1.7792
Novel01283	-1.1302	-0.50304
Novel01348	-7.3685	-1.4398
Novel01446	-2.0267	-5.1122
Novel01487	-1.6314	-4.3503
Novel01537	-3.1309	-2.3628
Novel01608	-3.5952	-4.0654
Novel01654	-2.1553	-1.0192
Novel01675	-1.9221	0.058272
Novel01728	-1.1063	-6.3261
Novel01731	-4.3835	-2.3023
Novel01744	-3.0121	-0.91606
Novel01772	-1.213	-0.77531
Novel01773	-1.5019	-1.1917
Novel01792	-5.143	-0.92378
Novel01808	-5.1058	-0.94719

## Sheet: Gene ontology (GO) analysis
Gene ontology (GO) analysis were performed using PAGE in Agrigo
GO Information_Guinongzhan					CM	log2.Fold_change.				GO Information_Wushansimiao (R534)					CM	log2.Fold_change.
No	GO Term	Onto	Number	Description	1	Z-score	Mean	FDR		No	GO Term	Onto	Number	Description	1	Z-score	Mean	FDRnbsp;
1	GO:0005975	P	121	carbohydrate metabolic process		8.6	0.5	0		1	GO:0005975	P	116	carbohydrate metabolic process		5.1	1.1	0.00012
2	GO:0005976	P	48	polysaccharide metabolic process		5.8	0.61	1.7e-06		2	GO:0008152	P	598	metabolic process		4.6	0.28	0.00093
3	GO:0044264	P	36	cellular polysaccharide metabolic process		5.1	0.67	2.5e-05		3	GO:0055114	P	126	oxidation-reduction process		4.2	0.8	0.002
4	GO:0044042	P	31	glucan metabolic process		5.1	0.82	2.5e-05		4	GO:0044710	P	265	single-organism metabolic process		4.2	0.48	0.002
5	GO:0006073	P	31	cellular glucan metabolic process		5.1	0.82	2.5e-05		5	GO:0044699	P	383	single-organism process		4.2	0.35	0.0023
6	GO:0016052	P	24	carbohydrate catabolic process		4.7	0.9	0.00019		6	GO:0071554	P	46	cell wall organization or biogenesis		3.8	1.3	0.01
7	GO:0000272	P	17	polysaccharide catabolic process		4.6	1.3	0.00028		7	GO:0044036	P	21	cell wall macromolecule metabolic process		3.7	1.9	0.011
8	GO:0009653	P	36	anatomical structure morphogenesis		4.4	0.39	0.00048		8	GO:0044281	P	117	small molecule metabolic process		3.5	0.65	0.02
9	GO:0044262	P	45	cellular carbohydrate metabolic process		4.2	0.15	0.00098		9	GO:1901564	P	90	organonitrogen compound metabolic process		3.3	0.72	0.037
10	GO:0009057	P	31	macromolecule catabolic process		3.7	0.24	0.0051		10	GO:0005976	P	35	polysaccharide metabolic process		3.2	1.2	0.05
11	GO:0048507	P	13	meristem development		3.7	1.1	0.0051		11	GO:0016798	F	53	hydrolase activity, acting on glycosyl bonds		4.9	1.6	4.6e-05
12	GO:0030243	P	12	cellulose metabolic process		3.7	1.2	0.0051		12	GO:0004553	F	52	hydrolase activity, hydrolyzing O-glycosyl compounds		4.9	1.6	4.6e-05
13	GO:0051273	P	13	beta-glucan metabolic process		3.6	1	0.0074		13	GO:0003824	F	520	catalytic activity		4.8	0.35	4.6e-05
14	GO:0007389	P	13	pattern specification process		3.5	0.93	0.011		14	GO:0016491	F	123	oxidoreductase activity		3.8	0.69	0.0042
15	GO:0003002	P	11	regionalization		3.5	1.1	0.011		15	GO:0016787	F	155	hydrolase activity		3.3	0.49	0.022
16	GO:0000271	P	22	polysaccharide biosynthetic process		3.3	0.29	0.021		16	GO:0005576	C	69	extracellular region		4.2	1.1	0.0017
17	GO:0033692	P	17	cellular polysaccharide biosynthetic process		3.2	0.49	0.023		17	GO:0044444	C	168	cytoplasmic part		3.8	0.57	0.0044
18	GO:0009888	P	21	tissue development		3.2	0.29	0.026		18	GO:0005618	C	56	cell wall		3.3	0.95	0.011
19	GO:0009250	P	12	glucan biosynthetic process		3.2	0.8	0.026		19	GO:0009536	C	77	plastid		3.2	0.77	0.011
20	GO:0040007	P	26	growth		3.1	0.092	0.029		20	GO:0009507	C	77	chloroplast		3.2	0.77	0.011
21	GO:0009886	P	10	post-embryonic morphogenesis		3.1	0.95	0.03		21	GO:0005737	C	201	cytoplasm		3.2	0.38	0.011
22	GO:0044036	P	26	cell wall macromolecule metabolic process		3	0.064	0.031		22	GO:0044446	C	71	intracellular organelle part		3.2	0.79	0.011
23	GO:0019693	P	13	ribose phosphate metabolic process		3	0.64	0.031		23	GO:0044422	C	71	organelle part		3.2	0.79	0.011
24	GO:0006996	P	20	organelle organization		3	0.25	0.031		24	GO:0030312	C	57	external encapsulating structure		3	0.83	0.02
25	GO:0048589	P	20	developmental growth		3	0.23	0.033		25	GO:0044434	C	38	chloroplast part		2.9	1	0.023
26	GO:0006091	P	11	generation of precursor metabolites and energy		3	0.75	0.036		26	GO:0005773	C	47	vacuole		2.7	0.85	0.032
27	GO:0071365	P	12	cellular response to auxin stimulus		2.8	0.57	0.049		27	GO:0009570	C	25	chloroplast stroma		2.7	1.2	0.032
28	GO:0009734	P	12	auxin-activated signaling pathway		2.8	0.57	0.049		28	GO:0044435	C	40	plastid part		2.7	0.92	0.033
29	GO:0010410	P	14	hemicellulose metabolic process		2.8	0.42	0.049		29	GO:0048046	C	30	apoplast		2.7	1.1	0.033
30	GO:0055086	P	23	nucleobase-containing small molecule metabolic process		2.8	0.028	0.049
31	GO:0016798	F	73	hydrolase activity, acting on glycosyl bonds		8.8	1.1	0
32	GO:0004553	F	73	hydrolase activity, hydrolyzing O-glycosyl compounds		8.8	1.1	0
33	GO:0005509	F	43	calcium ion binding		-3.2	-2.5	0.034
34	GO:0003700	F	108	transcription factor activity, sequence-specific DNA binding		-3.2	-2.1	0.031
35	GO:0001071	F	108	nucleic acid binding transcription factor activity		-3.2	-2.1	0.031
36	GO:0005576	C	89	extracellular region		5.9	0.13	2.3e-07
37	GO:0009505	C	38	plant-type cell wall		5	0.56	1.9e-05
38	GO:0048046	C	38	apoplast		4.3	0.28	0.00026
39	GO:0031975	C	18	envelope		2.8	0.23	0.023
40	GO:0031967	C	18	organelle envelope		2.8	0.23	0.023
41	GO:0055044	C	15	symplast		2.8	0.35	0.023
42	GO:0030054	C	15	cell junction		2.8	0.35	0.023
43	GO:0009506	C	15	plasmodesma		2.8	0.35	0.023
44	GO:0005911	C	15	cell-cell junction		2.8	0.35	0.023
45	GO:0009941	C	13	chloroplast envelope		2.6	0.37	0.033
46	GO:0009526	C	13	plastid envelope		2.6	0.37	0.033

## Sheet: KEGG analysis
KEGG: 96 and 93 KO terms were detected in Guinongzhan and Wushansimiao (R534) transcripts respectively
Guinongzhan (RKN vs mock)
#Term	Database	ID	Input number	Background number	P-Value	Corrected P-Value	Input	KEGG_ID/KO	Entrez_ID
Plant-pathogen interaction	KEGG PATHWAY	osa04626	43	130	1.62e-10	1.55e-08	BGIOSGA016994|BGIOSGA029074|BGIOSGA004017|BGIOSGA002446|BGIOSGA019646|BGIOSGA018153|BGIOSGA014335|BGIOSGA031997|BGIOSGA026401|BGIOSGA029796|BGIOSGA036663|BGIOSGA026494|BGIOSGA024062|BGIOSGA004722|BGIOSGA010559|BGIOSGA018556|BGIOSGA033493|BGIOSGA011066|BGIOSGA021174|BGIOSGA007926|BGIOSGA010806|BGIOSGA013697|BGIOSGA000109|BGIOSGA008300|BGIOSGA009117|BGIOSGA026567|BGIOSGA017475|BGIOSGA001257|BGIOSGA…	osa:4336783|osa:4346173|osa:4339751|osa:4325693|osa:4338474|osa:4338633|osa:4337016|osa:4348533|osa:4344304|osa:4347000|osa:4351450|osa:4346304|osa:4343644|osa:4327518|osa:4333065|osa:4325693|osa:4349484|osa:4333845|osa:4328953|osa:4328953|osa:4332731|osa:4334366|osa:4325762|osa:4329463|osa:4333845|osa:4346187|osa:4339751|osa:4324100|osa:4336258|osa:4330351|osa:4325862|osa:4331523|osa:4325408|osa…	4336783|4346173|4339751|4325693|4338474|4338633|4337016|4348533|4344304|4347000|4351450|4346304|4343644|4327518|4333065|4325693|4349484|4333845|4328953|4328953|4332731|4334366|4325762|4329463|4333845|4346187|4339751|4324100|4336258|4330351|4325862|4331523|4325408|4326027|4339092|4333845|4331833|4347834|4328155|4348531|4324023|4331832|4349736|
Phenylpropanoid biosynthesis	KEGG PATHWAY	osa00940	34	125	6.73e-07	3.23e-05	BGIOSGA018017|BGIOSGA026387|BGIOSGA026706|BGIOSGA026388|BGIOSGA008609|BGIOSGA003879|BGIOSGA029798|BGIOSGA029799|BGIOSGA008177|BGIOSGA029604|BGIOSGA014893|BGIOSGA014892|BGIOSGA003613|BGIOSGA021076|BGIOSGA026390|BGIOSGA008343|BGIOSGA005998|BGIOSGA005999|BGIOSGA013612|BGIOSGA006502|BGIOSGA012707|BGIOSGA002866|BGIOSGA023530|BGIOSGA026897|BGIOSGA007853|BGIOSGA036874|BGIOSGA009967|BGIOSGA032395|BGIOSGA…	osa:4338861|osa:4344276|osa:4345996|osa:4344277|osa:4329959|osa:4326376|osa:4346989|osa:4346988|osa:4329329|osa:4347336|osa:4336146|osa:4336146|osa:4324050|osa:4341249|osa:4344279|osa:4333841|osa:4330040|osa:4330037|osa:4334200|osa:4329324|osa:4332925|osa:4351703|osa:4341935|osa:4345717|osa:4341249|osa:4349585|osa:4333841|osa:4347963|osa:4337892|osa:4324050|osa:4347545|osa:4344046|osa:4347520|osa…	4338861|4344276|4345996|4344277|4329959|4326376|4346989|4346988|4329329|4347336|4336146|4336146|4324050|4341249|4344279|4333841|4330040|4330037|4334200|4329324|4332925|4351703|4341935|4345717|4341249|4349585|4333841|4347963|4337892|4324050|4347545|4344046|4347520|4343453|
Starch and sucrose metabolism	KEGG PATHWAY	osa00500	31	145	0.000116918	0.00374138	Novel00470|BGIOSGA026706|BGIOSGA028759|BGIOSGA011829|BGIOSGA009181|BGIOSGA020688|BGIOSGA007345|BGIOSGA000827|BGIOSGA014248|BGIOSGA023594|BGIOSGA000847|BGIOSGA029486|BGIOSGA030626|BGIOSGA001797|BGIOSGA008343|BGIOSGA030372|BGIOSGA014893|BGIOSGA014892|BGIOSGA023458|BGIOSGA003361|BGIOSGA021860|BGIOSGA009967|BGIOSGA028653|BGIOSGA005896|BGIOSGA026304|BGIOSGA029453|BGIOSGA033092|BGIOSGA016364|BGIOSGA003…	osa:4345573|osa:4345996|osa:4345706|osa:4331577|osa:4345706|osa:4341824|osa:4328018|osa:4324621|osa:4337166|osa:4347671|osa:4326549|osa:4347499|osa:4346885|osa:4327282|osa:4333841|osa:4346527|osa:4336146|osa:4336146|osa:4341833|osa:4327285|osa:4330709|osa:4333841|osa:4330753|osa:4330221|osa:4324050|osa:4347545|osa:4348838|osa:4335790|osa:4324050|osa:4329532|osa:4337166|	4345573|4345996|4345706|4331577|4345706|4341824|4328018|4324621|4337166|4347671|4326549|4347499|4346885|4327282|4333841|4346527|4336146|4336146|4341833|4327285|4330709|4333841|4330753|4330221|4324050|4347545|4348838|4335790|4324050|4329532|4337166|
Phenylalanine metabolism	KEGG PATHWAY	osa00360	23	99	0.000315254	0.0075661	BGIOSGA018017|BGIOSGA026387|BGIOSGA026388|BGIOSGA008177|BGIOSGA008027|BGIOSGA021076|BGIOSGA026390|BGIOSGA029604|BGIOSGA005998|BGIOSGA005999|BGIOSGA013612|BGIOSGA006502|BGIOSGA012707|BGIOSGA002866|BGIOSGA023530|BGIOSGA026897|BGIOSGA007853|BGIOSGA036874|BGIOSGA032395|BGIOSGA018760|BGIOSGA026226|BGIOSGA029473|BGIOSGA025854	osa:4338861|osa:4344276|osa:4344277|osa:4329329|osa:4329101|osa:4341249|osa:4344279|osa:4347336|osa:4330040|osa:4330037|osa:4334200|osa:4329324|osa:4332925|osa:4351703|osa:4341935|osa:4345717|osa:4341249|osa:4349585|osa:4347963|osa:4337892|osa:4344046|osa:4347520|osa:4343453|	4338861|4344276|4344277|4329329|4329101|4341249|4344279|4347336|4330040|4330037|4334200|4329324|4332925|4351703|4341935|4345717|4341249|4349585|4347963|4337892|4344046|4347520|4343453|
ABC transporters	KEGG PATHWAY	osa02010	6	9	0.0010961	0.0210451	BGIOSGA019148|BGIOSGA001856|BGIOSGA004262|BGIOSGA010981|BGIOSGA005802|BGIOSGA006983	osa:9268765|osa:9268765|osa:9268765|osa:4332438|osa:4330390|osa:4328568|	9268765|9268765|9268765|4332438|4330390|4328568|
Biosynthesis of secondary metabolites	KEGG PATHWAY	osa01110	100	779	0.00289371	0.0462994	BGIOSGA020486|BGIOSGA036685|BGIOSGA012169|BGIOSGA029294|BGIOSGA008385|BGIOSGA033275|BGIOSGA008609|BGIOSGA006907|BGIOSGA031973|BGIOSGA037758|BGIOSGA033076|BGIOSGA017090|BGIOSGA002270|BGIOSGA021621|BGIOSGA018692|BGIOSGA023594|BGIOSGA001898|BGIOSGA008343|BGIOSGA013470|BGIOSGA006087|BGIOSGA004841|BGIOSGA004840|BGIOSGA011548|BGIOSGA029453|BGIOSGA022876|BGIOSGA032869|BGIOSGA009042|BGIOSGA029338|BGIOSGA…	osa:4339812|osa:4351413|osa:4332134|osa:4347813|osa:4329593|osa:4349111|osa:4329959|osa:4328676|osa:4348560|osa:4352747|osa:4348804|osa:4336951|osa:4337968|osa:4340547|osa:4344382|osa:4347671|osa:4324263|osa:4333841|osa:4333932|osa:4329920|osa:4325067|osa:4325066|osa:4331460|osa:4347545|osa:4352058|osa:4348561|osa:4330711|osa:4347746|osa:4348268|osa:4333399|osa:4329329|osa:4345787|osa:4331893|osa…	4339812|4351413|4332134|4347813|4329593|4349111|4329959|4328676|4348560|4352747|4348804|4336951|4337968|4340547|4344382|4347671|4324263|4333841|4333932|4329920|4325067|4325066|4331460|4347545|4352058|4348561|4330711|4347746|4348268|4333399|4329329|4345787|4331893|4328435|4324050|4330451|4347336|4330040|4330037|4337048|4351413|4332925|4331502|4333841|4338861|4346989|4346988|4332184|4348304|4349585…
Plant hormone signal transduction	KEGG PATHWAY	osa04075	31	184	0.00365929	0.0501845	BGIOSGA019942|BGIOSGA026164|BGIOSGA031997|BGIOSGA014158|BGIOSGA023694|BGIOSGA029796|BGIOSGA005551|BGIOSGA010559|BGIOSGA017925|BGIOSGA032002|BGIOSGA033493|BGIOSGA003839|BGIOSGA012220|BGIOSGA031572|BGIOSGA004522|BGIOSGA017578|BGIOSGA001046|BGIOSGA007726|BGIOSGA006930|BGIOSGA010095|BGIOSGA020357|BGIOSGA011983|BGIOSGA008704|BGIOSGA023979|BGIOSGA033386|BGIOSGA011032|BGIOSGA006399|BGIOSGA004140|BGIOSGA…	osa:4338933|osa:4343944|osa:4348533|osa:4337309|osa:4344331|osa:4347000|osa:4330838|osa:4333065|osa:4327465|osa:4348531|osa:4349484|osa:4339797|osa:4332229|osa:4349090|osa:4325503|osa:4339588|osa:4325895|osa:4328605|osa:4328647|osa:4333666|osa:9268260|osa:4331833|osa:4330132|osa:4343785|osa:4331518|osa:4332374|osa:4329459|osa:4324182|osa:4327315|osa:4332111|osa:4331832|	4338933|4343944|4348533|4337309|4344331|4347000|4330838|4333065|4327465|4348531|4349484|4339797|4332229|4349090|4325503|4339588|4325895|4328605|4328647|4333666|9268260|4331833|4330132|4343785|4331518|4332374|4329459|4324182|4327315|4332111|4331832|
Alanine, aspartate and glutamate metabolism	KEGG PATHWAY	osa00250	10	41	0.0115826	0.13633	BGIOSGA016863|BGIOSGA036685|BGIOSGA013470|BGIOSGA027464|BGIOSGA011354|BGIOSGA012193|BGIOSGA034563|BGIOSGA011196|BGIOSGA026849|BGIOSGA010778	osa:4330164|osa:4351413|osa:4333932|osa:4344928|osa:4331792|osa:4332184|osa:4351413|osa:4332108|osa:4345787|osa:4332775|	4330164|4351413|4333932|4344928|4331792|4332184|4351413|4332108|4345787|4332775|
Degradation of aromatic compounds	KEGG PATHWAY	osa01220	5	12	0.0127809	0.13633	BGIOSGA034312|BGIOSGA008177|BGIOSGA034309|BGIOSGA006502|BGIOSGA011309	osa:4350053|osa:4329329|osa:4350054|osa:4329324|osa:4331893|	4350053|4329329|4350054|4329324|4331893|
Cyanoamino acid metabolism	KEGG PATHWAY	osa00460	9	36	0.0143066	0.137343	BGIOSGA008343|BGIOSGA009967|BGIOSGA014893|BGIOSGA014892|BGIOSGA026304|BGIOSGA029453|BGIOSGA026706|BGIOSGA022876|BGIOSGA003613	osa:4333841|osa:4333841|osa:4336146|osa:4336146|osa:4324050|osa:4347545|osa:4345996|osa:4352058|osa:4324050|	4333841|4333841|4336146|4336146|4324050|4347545|4345996|4352058|4324050|
alpha-Linolenic acid metabolism	KEGG PATHWAY	osa00592	8	33	0.0234689	0.204819	BGIOSGA016491|BGIOSGA021669|BGIOSGA021667|BGIOSGA009755|BGIOSGA021672|BGIOSGA021670|BGIOSGA011778|BGIOSGA033076	osa:4331824|osa:4340490|osa:4340490|osa:4334233|osa:4340486|osa:4340490|osa:4331515|osa:4348804|	4331824|4340490|4340490|4334233|4340486|4340490|4331515|4348804|
Ether lipid metabolism	KEGG PATHWAY	osa00565	6	22	0.0310626	0.248501	BGIOSGA020921|BGIOSGA031524|BGIOSGA031184|BGIOSGA023222|BGIOSGA002291|BGIOSGA002564	osa:4341467|osa:4349161|osa:4347745|osa:4341468|osa:4327647|osa:4326465|	4341467|4349161|4347745|4341468|4327647|4326465|
Metabolic pathways	KEGG PATHWAY	osa01100	169	1549	0.0424758	0.288	BGIOSGA008607|BGIOSGA020486|BGIOSGA030012|BGIOSGA036440|BGIOSGA036685|BGIOSGA012169|BGIOSGA029294|BGIOSGA017090|BGIOSGA033275|BGIOSGA008609|BGIOSGA004352|BGIOSGA009227|BGIOSGA031973|BGIOSGA037758|BGIOSGA002564|BGIOSGA009181|BGIOSGA033070|BGIOSGA021621|BGIOSGA037452|BGIOSGA000827|BGIOSGA037594|BGIOSGA018692|BGIOSGA014248|BGIOSGA016491|BGIOSGA029182|BGIOSGA001898|BGIOSGA025849|BGIOSGA011778|BGIOSGA…	osa:4329955|osa:4339812|osa:4345387|osa:4352615|osa:4351413|osa:4332134|osa:4347813|osa:4336951|osa:4349111|osa:4329959|osa:4324655|osa:4345212|osa:4348560|osa:4352747|osa:4326465|osa:4345706|osa:4348791|osa:4340547|osa:4352298|osa:4324621|osa:4332497|osa:4344382|osa:4337166|osa:4331824|osa:4346299|osa:4324263|osa:4343443|osa:4331515|osa:4327282|osa:4330164|osa:4333841|osa:4333932|osa:4337265|osa…	4329955|4339812|4345387|4352615|4351413|4332134|4347813|4336951|4349111|4329959|4324655|4345212|4348560|4352747|4326465|4345706|4348791|4340547|4352298|4324621|4332497|4344382|4337166|4331824|4346299|4324263|4343443|4331515|4327282|4330164|4333841|4333932|4337265|4339554|4348876|4327647|4347204|4329853|4340093|4331460|4347545|9270991|4352058|4348561|4342988|4328285|4339675|4330711|4345573|4333181…
Glycerophospholipid metabolism	KEGG PATHWAY	osa00564	12	68	0.0440644	0.288	BGIOSGA020921|BGIOSGA031524|BGIOSGA031184|BGIOSGA000901|BGIOSGA023222|BGIOSGA020327|BGIOSGA000911|BGIOSGA002291|BGIOSGA030831|BGIOSGA002564|BGIOSGA036440|BGIOSGA028217	osa:4341467|osa:4349161|osa:4347745|osa:4324704|osa:4341468|osa:4339554|osa:4325586|osa:4327647|osa:4347160|osa:4326465|osa:4352615|osa:4348512|	4341467|4349161|4347745|4324704|4341468|4339554|4325586|4327647|4347160|4326465|4352615|4348512|
Stilbenoid, diarylheptanoid and gingerol biosynthesis	KEGG PATHWAY	osa00945	5	18	0.045	0.288	BGIOSGA008177|BGIOSGA013604|BGIOSGA006502|BGIOSGA033275|BGIOSGA008609	osa:4329329|osa:4334183|osa:4329324|osa:4349111|osa:4329959|	4329329|4334183|4329324|4349111|4329959|
Carotenoid biosynthesis	KEGG PATHWAY	osa00906	6	26	0.0556364	0.333818	BGIOSGA013214|BGIOSGA005777|BGIOSGA029294|BGIOSGA025169|BGIOSGA011548|BGIOSGA008883	osa:4333566|osa:4330451|osa:4347813|osa:4342424|osa:4331460|osa:4347261|	4333566|4330451|4347813|4342424|4331460|4347261|
Glutathione metabolism	KEGG PATHWAY	osa00480	13	80	0.0600604	0.337048	BGIOSGA005167|BGIOSGA018537|BGIOSGA029338|BGIOSGA033329|BGIOSGA008765|BGIOSGA019178|BGIOSGA005166|BGIOSGA009948|BGIOSGA029891|BGIOSGA016904|BGIOSGA001631|BGIOSGA033316|BGIOSGA024440	osa:4325764|osa:4351923|osa:4347746|osa:4349190|osa:4330235|osa:4337813|osa:9269614|osa:4333870|osa:4346877|osa:4336627|osa:4325704|osa:4349185|osa:4342988|	4325764|4351923|4347746|4349190|4330235|4337813|9269614|4333870|4346877|4336627|4325704|4349185|4342988|
Diterpenoid biosynthesis	KEGG PATHWAY	osa00904	6	27	0.0631965	0.337048	BGIOSGA002270|BGIOSGA004485|BGIOSGA018604|BGIOSGA018602|BGIOSGA013985|BGIOSGA034012	osa:4337968|osa:4325145|osa:4325537|osa:4325537|osa:4334841|osa:4350502|	4337968|4325145|4325537|4325537|4334841|4350502|
Brassinosteroid biosynthesis	KEGG PATHWAY	osa00905	3	9	0.0805446	0.406962	BGIOSGA012169|BGIOSGA006911|BGIOSGA013086	osa:4332134|osa:9268939|osa:4333399|	4332134|9268939|4333399|
Taurine and hypotaurine metabolism	KEGG PATHWAY	osa00430	4	16	0.0910211	0.436902	BGIOSGA013470|BGIOSGA035805|BGIOSGA026849|BGIOSGA012193	osa:4333932|osa:4352829|osa:4345787|osa:4332184|	4333932|4352829|4345787|4332184|
Flavonoid biosynthesis	KEGG PATHWAY	osa00941	4	19	0.13576	0.569659	BGIOSGA008177|BGIOSGA006502|BGIOSGA032683|BGIOSGA008609	osa:4329329|osa:4329324|osa:4348304|osa:4329959|	4329329|4329324|4348304|4329959|
Cysteine and methionine metabolism	KEGG PATHWAY	osa00270	12	85	0.138009	0.569659	BGIOSGA011915|BGIOSGA008607|BGIOSGA004352|BGIOSGA009121|BGIOSGA031973|BGIOSGA013607|BGIOSGA037758|BGIOSGA009886|BGIOSGA011282|BGIOSGA008027|BGIOSGA029738|BGIOSGA032869	osa:4331707|osa:4329955|osa:4324655|osa:4330873|osa:4348560|osa:4334188|osa:4352747|osa:4333976|osa:4331941|osa:4329101|osa:4347103|osa:4348561|	4331707|4329955|4324655|4330873|4348560|4334188|4352747|4333976|4331941|4329101|4347103|4348561|
Amino sugar and nucleotide sugar metabolism	KEGG PATHWAY	osa00520	14	103	0.140741	0.569659	BGIOSGA004841|BGIOSGA020486|BGIOSGA036685|BGIOSGA011578|BGIOSGA006087|BGIOSGA034563|BGIOSGA004810|BGIOSGA012338|BGIOSGA014248|BGIOSGA014250|BGIOSGA023594|BGIOSGA010845|BGIOSGA004840|BGIOSGA029486	osa:4325067|osa:4339812|osa:4351413|osa:4331392|osa:4329920|osa:4351413|osa:4327172|osa:4332425|osa:4337166|osa:4337166|osa:4347671|osa:4351401|osa:4325066|osa:4347499|	4325067|4339812|4351413|4331392|4329920|4351413|4327172|4332425|4337166|4337166|4347671|4351401|4325066|4347499|
Nitrogen metabolism	KEGG PATHWAY	osa00910	5	27	0.142415	0.569659	BGIOSGA016863|BGIOSGA007262|BGIOSGA011196|BGIOSGA007372|BGIOSGA004285	osa:4330164|osa:4328052|osa:4332108|osa:4328052|osa:4324249|	4330164|4328052|4332108|4328052|4324249|
Butanoate metabolism	KEGG PATHWAY	osa00650	4	20	0.15233	0.584948	BGIOSGA013470|BGIOSGA027464|BGIOSGA026849|BGIOSGA012193	osa:4333932|osa:4344928|osa:4345787|osa:4332184|	4333932|4344928|4345787|4332184|
Galactose metabolism	KEGG PATHWAY	osa00052	8	54	0.170617	0.629971	BGIOSGA020486|BGIOSGA030372|BGIOSGA016364|BGIOSGA023458|BGIOSGA033188|BGIOSGA020688|BGIOSGA007345|BGIOSGA024622	osa:4339812|osa:4346527|osa:4335790|osa:4341833|osa:4348988|osa:4341824|osa:4328018|osa:4342703|	4339812|4346527|4335790|4341833|4348988|4341824|4328018|4342703|
Sphingolipid metabolism	KEGG PATHWAY	osa00600	4	22	0.187549	0.666842	BGIOSGA024385|BGIOSGA009988|BGIOSGA031703|BGIOSGA033188	osa:4348876|osa:4333811|osa:4348876|osa:4348988|	4348876|4333811|4348876|4348988|
Linoleic acid metabolism	KEGG PATHWAY	osa00591	3	15	0.204029	0.69953	BGIOSGA013391|BGIOSGA016491|BGIOSGA013525	osa:4333818|osa:4331824|osa:4334049|	4333818|4331824|4334049|
Riboflavin metabolism	KEGG PATHWAY	osa00740	2	8	0.215348	0.712877	BGIOSGA029302|BGIOSGA006207	osa:4347801|osa:4329733|	4347801|4329733|
Pentose and glucuronate interconversions	KEGG PATHWAY	osa00040	6	41	0.224355	0.717936	BGIOSGA001797|BGIOSGA003361|BGIOSGA031777|BGIOSGA015834|BGIOSGA001452|BGIOSGA000847	osa:4327282|osa:4327285|osa:4348800|osa:4335013|osa:4326883|osa:4326549|	4327282|4327285|4348800|4335013|4326883|4326549|
Sulfur metabolism	KEGG PATHWAY	osa00920	5	35	0.268578	0.831724	BGIOSGA004352|BGIOSGA011282|BGIOSGA001060|BGIOSGA031973|BGIOSGA032869	osa:4324655|osa:4331941|osa:4326319|osa:4348560|osa:4348561|	4324655|4331941|4326319|4348560|4348561|
Thiamine metabolism	KEGG PATHWAY	osa00730	2	10	0.282547	0.847641	BGIOSGA025849|BGIOSGA013327	osa:4343443|osa:4333719|	4343443|4333719|
Endocytosis	KEGG PATHWAY	osa04144	12	103	0.30247	0.856778	BGIOSGA020921|BGIOSGA031524|BGIOSGA031184|BGIOSGA017326|BGIOSGA023222|BGIOSGA017916|BGIOSGA013836|BGIOSGA002291|BGIOSGA004771|BGIOSGA012333|BGIOSGA031695|BGIOSGA033522	osa:4341467|osa:4349161|osa:4347745|osa:4337342|osa:4341468|osa:4339012|osa:4334598|osa:4327647|osa:4327388|osa:4332413|osa:4348891|osa:4351205|	4341467|4349161|4347745|4337342|4341468|4339012|4334598|4327647|4327388|4332413|4348891|4351205|
Tyrosine metabolism	KEGG PATHWAY	osa00350	5	37	0.303442	0.856778	BGIOSGA008027|BGIOSGA034312|BGIOSGA034309|BGIOSGA017742|BGIOSGA011309	osa:4329101|osa:4350053|osa:4350054|osa:4339281|osa:4331893|	4329101|4350053|4350054|4339281|4331893|
Biotin metabolism	KEGG PATHWAY	osa00780	3	20	0.325682	0.893298	BGIOSGA025219|BGIOSGA024748|BGIOSGA033070	osa:4342507|osa:9270991|osa:4348791|	4342507|9270991|4348791|
Arachidonic acid metabolism	KEGG PATHWAY	osa00590	2	12	0.349218	0.923527	BGIOSGA016904|BGIOSGA008765	osa:4336627|osa:4330235|	4336627|4330235|
Biosynthesis of unsaturated fatty acids	KEGG PATHWAY	osa01040	5	40	0.356802	0.923527	BGIOSGA025219|BGIOSGA010945|BGIOSGA024748|BGIOSGA033076|BGIOSGA033070	osa:4342507|osa:4332500|osa:9270991|osa:4348804|osa:4348791|	4342507|4332500|9270991|4348804|4348791|
Ubiquinone and other terpenoid-quinone biosynthesis	KEGG PATHWAY	osa00130	4	32	0.386525	0.923527	BGIOSGA008027|BGIOSGA008177|BGIOSGA006502|BGIOSGA026897	osa:4329101|osa:4329329|osa:4329324|osa:4345717|	4329101|4329329|4329324|4345717|
beta-Alanine metabolism	KEGG PATHWAY	osa00410	4	33	0.406926	0.923527	BGIOSGA013470|BGIOSGA014319|BGIOSGA026849|BGIOSGA012193	osa:4333932|osa:4337046|osa:4345787|osa:4332184|	4333932|4337046|4345787|4332184|
Arginine and proline metabolism	KEGG PATHWAY	osa00330	7	63	0.412863	0.923527	BGIOSGA008607|BGIOSGA014319|BGIOSGA016863|BGIOSGA017731|BGIOSGA029338|BGIOSGA011196|BGIOSGA029738	osa:4329955|osa:4337046|osa:4330164|osa:4339305|osa:4347746|osa:4332108|osa:4347103|	4329955|4337046|4330164|4339305|4347746|4332108|4347103|
Other glycan degradation	KEGG PATHWAY	osa00511	2	14	0.413663	0.923527	BGIOSGA024385|BGIOSGA031703	osa:4348876|osa:4348876|	4348876|4348876|
Limonene and pinene degradation	KEGG PATHWAY	osa00903	2	14	0.413663	0.923527	BGIOSGA013604|BGIOSGA033275	osa:4334183|osa:4349111|	4334183|4349111|
Zeatin biosynthesis	KEGG PATHWAY	osa00908	2	14	0.413663	0.923527	BGIOSGA000724|BGIOSGA037012	osa:4327887|osa:4348932|	4327887|4348932|
One carbon pool by folate	KEGG PATHWAY	osa00670	2	15	0.444683	0.948657	BGIOSGA030864|BGIOSGA022876	osa:4347204|osa:4352058|	4347204|4352058|
Lysine biosynthesis	KEGG PATHWAY	osa00300	2	15	0.444683	0.948657	BGIOSGA013607|BGIOSGA012434	osa:4334188|osa:4332563|	4334188|4332563|
Selenocompound metabolism	KEGG PATHWAY	osa00450	2	16	0.474765	0.990814	BGIOSGA031973|BGIOSGA032869	osa:4348560|osa:4348561|	4348560|4348561|
Fatty acid biosynthesis	KEGG PATHWAY	osa00061	4	40	0.543572	0.999277	BGIOSGA025219|BGIOSGA024748|BGIOSGA022278|BGIOSGA033070	osa:4342507|osa:9270991|osa:4340093|osa:4348791|	4342507|9270991|4340093|4348791|
Glycosphingolipid biosynthesis - globo series	KEGG PATHWAY	osa00603	1	8	0.560887	0.999277	BGIOSGA033188	osa:4348988|	4348988|
Fatty acid degradation	KEGG PATHWAY	osa00071	4	41	0.561793	0.999277	BGIOSGA033076|BGIOSGA034309|BGIOSGA034312|BGIOSGA011309	osa:4348804|osa:4350054|osa:4350053|osa:4331893|	4348804|4350054|4350053|4331893|
Phenylalanine, tyrosine and tryptophan biosynthesis	KEGG PATHWAY	osa00400	4	42	0.579611	0.999277	BGIOSGA008027|BGIOSGA021621|BGIOSGA011056|BGIOSGA014945	osa:4329101|osa:4340547|osa:4332341|osa:4336076|	4329101|4340547|4332341|4336076|
Isoquinoline alkaloid biosynthesis	KEGG PATHWAY	osa00950	2	20	0.584531	0.999277	BGIOSGA008027|BGIOSGA017742	osa:4329101|osa:4339281|	4329101|4339281|
Glycolysis / Gluconeogenesis	KEGG PATHWAY	osa00010	11	119	0.590047	0.999277	BGIOSGA034309|BGIOSGA011309|BGIOSGA034312|BGIOSGA027394|BGIOSGA018692|BGIOSGA032182|BGIOSGA021980|Novel00606|BGIOSGA001898|BGIOSGA007623|BGIOSGA020022	osa:4350054|osa:4331893|osa:4350053|osa:4337265|osa:4344382|osa:4348268|osa:4340042|osa:4344564|osa:4324263|osa:4328435|osa:4339066|	4350054|4331893|4350053|4337265|4344382|4348268|4340042|4344564|4324263|4328435|4339066|
Carbon fixation in photosynthetic organisms	KEGG PATHWAY	osa00710	7	77	0.608765	0.999277	BGIOSGA030012|BGIOSGA010483|BGIOSGA027085|BGIOSGA032182|Novel00606|BGIOSGA002229|BGIOSGA007623	osa:4345387|osa:4333181|osa:4345387|osa:4348268|osa:4344564|osa:4326769|osa:4328435|	4345387|4333181|4345387|4348268|4344564|4326769|4328435|
Porphyrin and chlorophyll metabolism	KEGG PATHWAY	osa00860	3	35	0.656979	0.999277	BGIOSGA031606|BGIOSGA009042|BGIOSGA017090	osa:4349044|osa:4330711|osa:4336951|	4349044|4330711|4336951|
Fatty acid metabolism	KEGG PATHWAY	osa01212	6	72	0.686994	0.999277	BGIOSGA010945|BGIOSGA022278|BGIOSGA025219|BGIOSGA024748|BGIOSGA033076|BGIOSGA033070	osa:4332500|osa:4340093|osa:4342507|osa:9270991|osa:4348804|osa:4348791|	4332500|4340093|4342507|9270991|4348804|4348791|
Circadian rhythm - plant	KEGG PATHWAY	osa04712	2	25	0.696611	0.999277	BGIOSGA028019|BGIOSGA002246	osa:4344703|osa:4325329|	4344703|4325329|
Pyruvate metabolism	KEGG PATHWAY	osa00620	6	75	0.72178	0.999277	BGIOSGA027085|BGIOSGA010483|BGIOSGA030012|BGIOSGA032182|BGIOSGA001898|BGIOSGA002229	osa:4345387|osa:4333181|osa:4345387|osa:4348268|osa:4324263|osa:4326769|	4345387|4333181|4345387|4348268|4324263|4326769|
Nicotinate and nicotinamide metabolism	KEGG PATHWAY	osa00760	1	13	0.722121	0.999277	BGIOSGA004307	osa:4327823|	4327823|
Sulfur relay system	KEGG PATHWAY	osa04122	1	14	0.746429	0.999277	BGIOSGA037452	osa:4352298|	4352298|
Histidine metabolism	KEGG PATHWAY	osa00340	1	15	0.768614	0.999277	BGIOSGA008385	osa:4329593|	4329593|
Phosphatidylinositol signaling system	KEGG PATHWAY	osa04070	3	43	0.778516	0.999277	BGIOSGA037594|BGIOSGA036440|BGIOSGA008174	osa:4332497|osa:4352615|osa:4329322|	4332497|4352615|4329322|
Glycerolipid metabolism	KEGG PATHWAY	osa00561	3	43	0.778516	0.999277	BGIOSGA036440|BGIOSGA009227|BGIOSGA033188	osa:4352615|osa:4345212|osa:4348988|	4352615|4345212|4348988|
Tropane, piperidine and pyridine alkaloid biosynthesis	KEGG PATHWAY	osa00960	1	16	0.78886	0.999277	BGIOSGA008027	osa:4329101|	4329101|
Glyoxylate and dicarboxylate metabolism	KEGG PATHWAY	osa00630	4	58	0.802353	0.999277	BGIOSGA017163|BGIOSGA011196|BGIOSGA007252|BGIOSGA022876	osa:4337048|osa:4332108|osa:4328073|osa:4352058|	4337048|4332108|4328073|4352058|
Inositol phosphate metabolism	KEGG PATHWAY	osa00562	3	45	0.802687	0.999277	BGIOSGA002564|BGIOSGA037594|BGIOSGA008174	osa:4326465|osa:4332497|osa:4329322|	4326465|4332497|4329322|
Cutin, suberine and wax biosynthesis	KEGG PATHWAY	osa00073	1	17	0.807336	0.999277	BGIOSGA029184	osa:4346301|	4346301|
Terpenoid backbone biosynthesis	KEGG PATHWAY	osa00900	3	47	0.824603	0.999277	BGIOSGA005875|BGIOSGA009042|BGIOSGA003143	osa:4330260|osa:4330711|osa:9272383|	4330260|4330711|9272383|
Biosynthesis of amino acids	KEGG PATHWAY	osa01230	16	207	0.829776	0.999277	BGIOSGA021621|BGIOSGA011196|BGIOSGA031973|BGIOSGA012434|BGIOSGA013607|BGIOSGA011056|BGIOSGA014945|BGIOSGA011282|BGIOSGA008027|BGIOSGA004352|BGIOSGA021980|BGIOSGA022876|BGIOSGA032869|Novel00606|BGIOSGA001898|BGIOSGA007623	osa:4340547|osa:4332108|osa:4348560|osa:4332563|osa:4334188|osa:4332341|osa:4336076|osa:4331941|osa:4329101|osa:4324655|osa:4340042|osa:4352058|osa:4348561|osa:4344564|osa:4324263|osa:4328435|	4340547|4332108|4348560|4332563|4334188|4332341|4336076|4331941|4329101|4324655|4340042|4352058|4348561|4344564|4324263|4328435|
Folate biosynthesis	KEGG PATHWAY	osa00790	1	19	0.839584	0.999277	BGIOSGA037452	osa:4352298|	4352298|
N-Glycan biosynthesis	KEGG PATHWAY	osa00510	2	35	0.846213	0.999277	BGIOSGA006132|BGIOSGA007528	osa:4329853|osa:4328285|	4329853|4328285|
Peroxisome	KEGG PATHWAY	osa04146	5	78	0.861688	0.999277	BGIOSGA033076|BGIOSGA029184|BGIOSGA013685|BGIOSGA007252|BGIOSGA017163	osa:4348804|osa:4346301|osa:4334348|osa:4328073|osa:4337048|	4348804|4346301|4334348|4328073|4337048|
Tryptophan metabolism	KEGG PATHWAY	osa00380	1	21	0.86644	0.999277	BGIOSGA007252	osa:4328073|	4328073|
Glycine, serine and threonine metabolism	KEGG PATHWAY	osa00260	3	55	0.892589	0.999277	BGIOSGA013607|BGIOSGA010778|BGIOSGA022876	osa:4334188|osa:4332775|osa:4352058|	4334188|4332775|4352058|
Fatty acid elongation	KEGG PATHWAY	osa00062	1	24	0.898542	0.999277	BGIOSGA006907	osa:4328676|	4328676|
Regulation of autophagy	KEGG PATHWAY	osa04140	1	26	0.915536	0.999277	BGIOSGA000113	osa:4325756|	4325756|
Carbon metabolism	KEGG PATHWAY	osa01200	15	225	0.938536	0.999277	BGIOSGA030012|BGIOSGA011309|BGIOSGA027085|BGIOSGA010483|BGIOSGA004352|BGIOSGA011282|BGIOSGA030864|BGIOSGA032182|BGIOSGA021980|BGIOSGA022876|Novel00606|BGIOSGA001898|BGIOSGA002229|BGIOSGA007623|BGIOSGA024440	osa:4345387|osa:4331893|osa:4345387|osa:4333181|osa:4324655|osa:4331941|osa:4347204|osa:4348268|osa:4340042|osa:4352058|osa:4344564|osa:4324263|osa:4326769|osa:4328435|osa:4342988|	4345387|4331893|4345387|4333181|4324655|4331941|4347204|4348268|4340042|4352058|4344564|4324263|4326769|4328435|4342988|
Ascorbate and aldarate metabolism	KEGG PATHWAY	osa00053	1	36	0.966245	0.999277	BGIOSGA029182	osa:4346299|	4346299|
Valine, leucine and isoleucine degradation	KEGG PATHWAY	osa00280	1	36	0.966245	0.999277	BGIOSGA033076	osa:4348804|	4348804|
Protein export	KEGG PATHWAY	osa03060	2	56	0.967704	0.999277	BGIOSGA026796|BGIOSGA029649	osa:4345847|osa:4347239|	4345847|4347239|
Protein processing in endoplasmic reticulum	KEGG PATHWAY	osa04141	12	203	0.969005	0.999277	BGIOSGA013692|BGIOSGA013314|BGIOSGA009084|BGIOSGA017916|BGIOSGA013836|BGIOSGA016881|BGIOSGA021171|BGIOSGA004771|BGIOSGA012333|BGIOSGA021653|BGIOSGA006264|BGIOSGA000754	osa:4334359|osa:4333714|osa:4330786|osa:4339012|osa:4334598|osa:4336584|osa:4337331|osa:4327388|osa:4332413|osa:4340508|osa:4329652|osa:4325492|	4334359|4333714|4330786|4339012|4334598|4336584|4337331|4327388|4332413|4340508|4329652|4325492|
Ribosome biogenesis in eukaryotes	KEGG PATHWAY	osa03008	4	90	0.969482	0.999277	BGIOSGA037773|BGIOSGA017715|BGIOSGA040494|BGIOSGA008212	osa:4352760|osa:4339341|osa:4352036|osa:4329368|	4352760|4339341|4352036|4329368|
Purine metabolism	KEGG PATHWAY	osa00230	7	135	0.970103	0.999277	BGIOSGA011354|BGIOSGA004307|BGIOSGA036477|BGIOSGA001898|BGIOSGA000438|BGIOSGA029302|BGIOSGA014124	osa:4331792|osa:4327823|osa:4351721|osa:4324263|osa:4324793|osa:4347801|osa:4331502|	4331792|4327823|4351721|4324263|4324793|4347801|4331502|
SNARE interactions in vesicular transport	KEGG PATHWAY	osa04130	1	38	0.971906	0.999277	BGIOSGA013690	osa:4334356|	4334356|
RNA degradation	KEGG PATHWAY	osa03018	4	92	0.973147	0.999277	BGIOSGA004524|BGIOSGA017385|BGIOSGA021980|BGIOSGA008212	osa:4325594|osa:4337457|osa:4340042|osa:4329368|	4325594|4337457|4340042|4329368|
Pyrimidine metabolism	KEGG PATHWAY	osa00240	5	112	0.979593	0.999277	BGIOSGA004307|BGIOSGA017521|BGIOSGA004131|BGIOSGA001203|BGIOSGA006714	osa:4327823|osa:4339675|osa:4324172|osa:4339675|osa:4328991|	4327823|4339675|4324172|4339675|4328991|
Aminoacyl-tRNA biosynthesis	KEGG PATHWAY	osa00970	5	114	0.981952	0.999277	BGIOSGA029860|BGIOSGA023362|BGIOSGA031040|BGIOSGA001620|BGIOSGA018678	osa:4346920|osa:9272464|osa:4347497|osa:4325717|osa:4337996|	4346920|9272464|4347497|4325717|4337996|
2-Oxocarboxylic acid metabolism	KEGG PATHWAY	osa01210	1	46	0.986524	0.999277	BGIOSGA013607	osa:4334188|	4334188|
Ubiquitin mediated proteolysis	KEGG PATHWAY	osa04120	5	119	0.986778	0.999277	BGIOSGA017588|BGIOSGA021171|BGIOSGA011856|BGIOSGA026442|BGIOSGA000905	osa:4326008|osa:4337331|osa:4348796|osa:4344380|osa:4324695|	4326008|4337331|4348796|4344380|4324695|
Pentose phosphate pathway	KEGG PATHWAY	osa00030	1	48	0.988786	0.999277	BGIOSGA024440	osa:4342988|	4342988|
mRNA surveillance pathway	KEGG PATHWAY	osa03015	4	107	0.990028	0.999277	BGIOSGA029341|BGIOSGA010865|BGIOSGA025076|BGIOSGA010995	osa:4339558|osa:9272301|osa:4342307|osa:4332426|	4339558|9272301|4342307|4332426|
Citrate cycle (TCA cycle)	KEGG PATHWAY	osa00020	1	50	0.990669	0.999277	BGIOSGA032182	osa:4348268|	4348268|
Fructose and mannose metabolism	KEGG PATHWAY	osa00051	1	53	0.992918	0.999277	BGIOSGA011578	osa:4331392|	4331392|
RNA transport	KEGG PATHWAY	osa03013	6	151	0.995156	0.999277	BGIOSGA019672|BGIOSGA003516|BGIOSGA000657|BGIOSGA020115|BGIOSGA010995|BGIOSGA008018	osa:4338508|osa:4325820|osa:4324136|osa:4339216|osa:4332426|osa:4329091|	4338508|4325820|4324136|4339216|4332426|4329091|
Proteasome	KEGG PATHWAY	osa03050	1	64	0.997426	0.999277	BGIOSGA000187	osa:4328287|	4328287|
Spliceosome	KEGG PATHWAY	osa03040	8	196	0.997831	0.999277	BGIOSGA031012|BGIOSGA026750|BGIOSGA000279|BGIOSGA017916|BGIOSGA013836|BGIOSGA004771|BGIOSGA012333|BGIOSGA010995	osa:9268567|osa:4345910|osa:4326190|osa:4339012|osa:4334598|osa:4327388|osa:4332413|osa:4332426|	9268567|4345910|4326190|4339012|4334598|4327388|4332413|4332426|
Oxidative phosphorylation	KEGG PATHWAY	osa00190	4	144	0.999277	0.999277	BGIOSGA018938|BGIOSGA019932|BGIOSGA005419|BGIOSGA005458	osa:4337608|osa:4338911|osa:4331044|osa:4330974|	4337608|4338911|4331044|4330974|
Wushansimiao (R534) (RKN vs mock)
#Term	Database	ID	Input number	Background number	P-Value	Corrected P-Value	Input	KEGG_ID/KO	Entrez_ID
Phenylalanine metabolism	KEGG PATHWAY	osa00360	27	99	5.62396e-06	0.000523028	BGIOSGA018017|BGIOSGA026390|BGIOSGA026388|BGIOSGA007656|BGIOSGA020118|BGIOSGA018301|BGIOSGA034669|BGIOSGA021078|BGIOSGA021074|BGIOSGA025043|BGIOSGA014207|BGIOSGA016027|BGIOSGA008027|BGIOSGA005999|BGIOSGA033360|BGIOSGA034670|BGIOSGA012707|BGIOSGA002866|BGIOSGA004889|BGIOSGA023530|BGIOSGA027874|BGIOSGA016419|BGIOSGA002265|BGIOSGA007853|BGIOSGA036874|BGIOSGA011160|BGIOSGA032395	osa:4338861|osa:4344279|osa:4344277|osa:4328485|osa:4339222|osa:4338409|osa:4349585|osa:4341247|osa:4341252|osa:4342251|osa:4337232|osa:4335335|osa:4329101|osa:4330037|osa:4349241|osa:4351300|osa:4332925|osa:4351703|osa:4324941|osa:4341935|osa:4344496|osa:4335846|osa:4324941|osa:4341249|osa:4349585|osa:4332175|osa:4347963|	4338861|4344279|4344277|4328485|4339222|4338409|4349585|4341247|4341252|4342251|4337232|4335335|4329101|4330037|4349241|4351300|4332925|4351703|4324941|4341935|4344496|4335846|4324941|4341249|4349585|4332175|4347963|
Phenylpropanoid biosynthesis	KEGG PATHWAY	osa00940	29	125	3.52032e-05	0.00119627	BGIOSGA018017|BGIOSGA026390|BGIOSGA026388|BGIOSGA007656|BGIOSGA029799|BGIOSGA020118|BGIOSGA018301|BGIOSGA034669|BGIOSGA021078|BGIOSGA003613|BGIOSGA006996|BGIOSGA014207|BGIOSGA014893|BGIOSGA005999|BGIOSGA004982|BGIOSGA033360|BGIOSGA034670|BGIOSGA012707|BGIOSGA002866|BGIOSGA023530|BGIOSGA027874|BGIOSGA016419|BGIOSGA007853|BGIOSGA036874|BGIOSGA011160|BGIOSGA032395|BGIOSGA029453|BGIOSGA030202|BGIOSGA…	osa:4338861|osa:4344279|osa:4344277|osa:4328485|osa:4346988|osa:4339222|osa:4338409|osa:4349585|osa:4341247|osa:4324050|osa:4328552|osa:4337232|osa:4336146|osa:4330037|osa:4348315|osa:4349241|osa:4351300|osa:4332925|osa:4351703|osa:4341935|osa:4344496|osa:4335846|osa:4341249|osa:4349585|osa:4332175|osa:4347963|osa:4347545|osa:4346438|osa:4342251|	4338861|4344279|4344277|4328485|4346988|4339222|4338409|4349585|4341247|4324050|4328552|4337232|4336146|4330037|4348315|4349241|4351300|4332925|4351703|4341935|4344496|4335846|4341249|4349585|4332175|4347963|4347545|4346438|4342251|
Glycolysis / Gluconeogenesis	KEGG PATHWAY	osa00010	28	119	3.85895e-05	0.00119627	BGIOSGA004691|BGIOSGA016636|BGIOSGA008564|BGIOSGA017279|BGIOSGA013440|BGIOSGA029976|BGIOSGA014088|BGIOSGA032247|BGIOSGA001898|BGIOSGA007623|BGIOSGA032264|BGIOSGA004775|BGIOSGA034421|BGIOSGA000859|BGIOSGA022643|Novel00606|BGIOSGA021980|BGIOSGA027913|BGIOSGA034500|BGIOSGA020021|BGIOSGA035008|BGIOSGA017060|BGIOSGA017978|BGIOSGA034312|BGIOSGA027394|BGIOSGA036640|BGIOSGA011109|BGIOSGA010938	osa:4327493|osa:4336216|osa:4329892|osa:4337265|osa:4333895|osa:4346747|osa:4337406|osa:4348176|osa:4324263|osa:4328435|osa:4348152|osa:4327400|osa:4349897|osa:4339369|osa:4340677|osa:4344564|osa:4340042|osa:4344564|osa:4349774|osa:4339066|osa:4350078|osa:4337265|osa:4325071|osa:4350053|osa:4337265|osa:4351493|osa:4332253|osa:4332519|	4327493|4336216|4329892|4337265|4333895|4346747|4337406|4348176|4324263|4328435|4348152|4327400|4349897|4339369|4340677|4344564|4340042|4344564|4349774|4339066|4350078|4337265|4325071|4350053|4337265|4351493|4332253|4332519|
Plant-pathogen interaction	KEGG PATHWAY	osa04626	28	130	0.00014422	0.00335312	BGIOSGA016994|BGIOSGA001663|BGIOSGA018154|BGIOSGA019646|BGIOSGA031997|BGIOSGA011983|BGIOSGA024062|BGIOSGA004722|BGIOSGA010559|BGIOSGA033493|BGIOSGA011066|BGIOSGA013697|BGIOSGA000109|BGIOSGA009117|BGIOSGA026567|BGIOSGA005164|BGIOSGA017260|BGIOSGA026730|BGIOSGA014719|BGIOSGA000087|BGIOSGA017876|BGIOSGA002446|BGIOSGA037531|BGIOSGA007434|BGIOSGA032002|BGIOSGA011332|BGIOSGA011765|BGIOSGA000756	osa:4336783|osa:4326027|osa:4338633|osa:4338474|osa:4348533|osa:4331833|osa:4343644|osa:4327518|osa:4333065|osa:4349484|osa:4333845|osa:4334366|osa:4325762|osa:4333845|osa:4346187|osa:4325760|osa:4337240|osa:9267802|osa:4325862|osa:4325408|osa:4339092|osa:4325693|osa:4326027|osa:4328155|osa:4348531|osa:4331832|osa:4331490|osa:4325488|	4336783|4326027|4338633|4338474|4348533|4331833|4343644|4327518|4333065|4349484|4333845|4334366|4325762|4333845|4346187|4325760|4337240|9267802|4325862|4325408|4339092|4325693|4326027|4328155|4348531|4331832|4331490|4325488|
Biosynthesis of secondary metabolites	KEGG PATHWAY	osa01110	104	779	0.000293047	0.00545068	BGIOSGA001013|BGIOSGA004125|BGIOSGA004691|BGIOSGA012169|BGIOSGA029359|BGIOSGA006907|BGIOSGA000215|BGIOSGA008027|BGIOSGA017490|BGIOSGA037610|BGIOSGA032395|BGIOSGA014088|BGIOSGA000765|BGIOSGA001898|BGIOSGA029990|BGIOSGA006996|BGIOSGA032264|BGIOSGA001006|BGIOSGA034421|BGIOSGA017060|BGIOSGA022643|BGIOSGA033360|BGIOSGA034500|BGIOSGA016419|BGIOSGA004840|BGIOSGA029453|BGIOSGA029191|BGIOSGA010938|BGIOSGA…	osa:4324398|osa:4325375|osa:4327493|osa:4332134|osa:4347717|osa:4328676|osa:4327239|osa:4329101|osa:4339718|osa:4352549|osa:4347963|osa:4337406|osa:4326889|osa:4324263|osa:4346723|osa:4328552|osa:4348152|osa:4324117|osa:4349897|osa:4337265|osa:4340677|osa:4349241|osa:4349774|osa:4335846|osa:4325066|osa:4347545|osa:4346318|osa:4332519|osa:4338719|osa:4348172|osa:4336216|osa:4328485|osa:4335335|osa…	4324398|4325375|4327493|4332134|4347717|4328676|4327239|4329101|4339718|4352549|4347963|4337406|4326889|4324263|4346723|4328552|4348152|4324117|4349897|4337265|4340677|4349241|4349774|4335846|4325066|4347545|4346318|4332519|4338719|4348172|4336216|4328485|4335335|4338409|4339892|4340026|4328435|4324050|4342251|4333014|4330451|4330037|4348315|4344564|4337232|4332925|9269735|4332175|4327400|4339369…
Biosynthesis of amino acids	KEGG PATHWAY	osa01230	37	207	0.00037878	0.00587109	BGIOSGA001013|BGIOSGA004125|BGIOSGA004691|BGIOSGA016636|BGIOSGA013607|BGIOSGA005667|BGIOSGA029359|BGIOSGA008564|BGIOSGA021999|BGIOSGA022246|BGIOSGA016111|BGIOSGA014088|BGIOSGA000765|BGIOSGA034421|BGIOSGA001898|BGIOSGA007623|BGIOSGA021074|BGIOSGA000215|BGIOSGA004775|BGIOSGA014182|BGIOSGA008027|BGIOSGA032247|BGIOSGA029191|BGIOSGA008288|BGIOSGA021980|BGIOSGA027913|BGIOSGA012784|BGIOSGA034500|BGIOSGA…	osa:4324398|osa:4325375|osa:4327493|osa:4336216|osa:4334188|osa:4330649|osa:4347717|osa:4329892|osa:4340025|osa:4340026|osa:4335430|osa:4337406|osa:4326889|osa:4349897|osa:4324263|osa:4328435|osa:4341252|osa:4327239|osa:4327400|osa:4337272|osa:4329101|osa:4348176|osa:4346318|osa:4329450|osa:4340042|osa:4344564|osa:4333014|osa:4349774|osa:4324941|osa:4324941|osa:4350078|osa:4336076|osa:4339369|osa…	4324398|4325375|4327493|4336216|4334188|4330649|4347717|4329892|4340025|4340026|4335430|4337406|4326889|4349897|4324263|4328435|4341252|4327239|4327400|4337272|4329101|4348176|4346318|4329450|4340042|4344564|4333014|4349774|4324941|4324941|4350078|4336076|4339369|4351493|4332253|4344564|4336353|
Nitrogen metabolism	KEGG PATHWAY	osa00910	10	27	0.000788433	0.0104749	BGIOSGA001013|BGIOSGA016863|BGIOSGA005555|BGIOSGA014182|BGIOSGA005667|BGIOSGA004285|BGIOSGA001448|BGIOSGA003498|BGIOSGA005531|BGIOSGA007372	osa:4324398|osa:4330164|osa:4326014|osa:4337272|osa:4330649|osa:4324249|osa:4328052|osa:4326014|osa:4330867|osa:4328052|	4324398|4330164|4326014|4337272|4330649|4324249|4328052|4326014|4330867|4328052|
Starch and sucrose metabolism	KEGG PATHWAY	osa00500	27	145	0.00133525	0.0155223	BGIOSGA019700|BGIOSGA031535|BGIOSGA026169|BGIOSGA013440|BGIOSGA020688|BGIOSGA009184|BGIOSGA000827|BGIOSGA017490|BGIOSGA009850|BGIOSGA030039|BGIOSGA000339|BGIOSGA003613|BGIOSGA008363|BGIOSGA030626|BGIOSGA014893|BGIOSGA022643|BGIOSGA015483|BGIOSGA004982|BGIOSGA026976|BGIOSGA003361|BGIOSGA026185|BGIOSGA005896|BGIOSGA028759|BGIOSGA029453|BGIOSGA015140|BGIOSGA031231|BGIOSGA014250	osa:4327282|osa:4349141|osa:4343959|osa:4333895|osa:4341824|osa:4330975|osa:4324621|osa:4339718|osa:4334029|osa:4346656|osa:4324962|osa:4324050|osa:4329561|osa:4346885|osa:4336146|osa:4340677|osa:4335447|osa:4348315|osa:4345573|osa:4327285|osa:4343975|osa:4330221|osa:4345706|osa:4347545|osa:4329532|osa:4347800|osa:4337166|	4327282|4349141|4343959|4333895|4341824|4330975|4324621|4339718|4334029|4346656|4324962|4324050|4329561|4346885|4336146|4340677|4335447|4348315|4345573|4327285|4343975|4330221|4345706|4347545|4329532|4347800|4337166|
Pentose phosphate pathway	KEGG PATHWAY	osa00030	11	48	0.0101087	0.104457	BGIOSGA000215|BGIOSGA022167|BGIOSGA016111|BGIOSGA034421|BGIOSGA022643|BGIOSGA013440|BGIOSGA017978|BGIOSGA000859|BGIOSGA024440|BGIOSGA008556|BGIOSGA021999	osa:4327239|osa:4339892|osa:4335430|osa:4349897|osa:4340677|osa:4333895|osa:4325071|osa:4339369|osa:4342988|osa:4329889|osa:4340025|	4327239|4339892|4335430|4349897|4340677|4333895|4325071|4339369|4342988|4329889|4340025|
Carbon metabolism	KEGG PATHWAY	osa01200	33	225	0.01166	0.108438	BGIOSGA004691|BGIOSGA016636|BGIOSGA008564|BGIOSGA009572|BGIOSGA018078|BGIOSGA021999|BGIOSGA022167|BGIOSGA010483|BGIOSGA000820|BGIOSGA016111|BGIOSGA004313|BGIOSGA014088|BGIOSGA032247|BGIOSGA001898|BGIOSGA007623|BGIOSGA014839|BGIOSGA021074|BGIOSGA024440|BGIOSGA000215|BGIOSGA004775|BGIOSGA034421|BGIOSGA000859|BGIOSGA022643|BGIOSGA021980|BGIOSGA027913|BGIOSGA034500|BGIOSGA008556|BGIOSGA035008|BGIOSGA…	osa:4327493|osa:4336216|osa:4329892|osa:4334554|osa:4338750|osa:4340025|osa:4339892|osa:4333181|osa:4324637|osa:4335430|osa:4325932|osa:4337406|osa:4348176|osa:4324263|osa:4328435|osa:9268154|osa:4341252|osa:4342988|osa:4327239|osa:4327400|osa:4349897|osa:4339369|osa:4340677|osa:4340042|osa:4344564|osa:4349774|osa:4329889|osa:4350078|osa:4325071|osa:4351493|osa:4332253|osa:4344564|osa:4336353|	4327493|4336216|4329892|4334554|4338750|4340025|4339892|4333181|4324637|4335430|4325932|4337406|4348176|4324263|4328435|9268154|4341252|4342988|4327239|4327400|4349897|4339369|4340677|4340042|4344564|4349774|4329889|4350078|4325071|4351493|4332253|4344564|4336353|
Phenylalanine, tyrosine and tryptophan biosynthesis	KEGG PATHWAY	osa00400	9	42	0.0266571	0.220999	BGIOSGA012784|BGIOSGA002265|BGIOSGA008027|BGIOSGA014945|BGIOSGA022246|BGIOSGA029359|BGIOSGA000765|BGIOSGA004889|BGIOSGA021074	osa:4333014|osa:4324941|osa:4329101|osa:4336076|osa:4340026|osa:4347717|osa:4326889|osa:4324941|osa:4341252|	4333014|4324941|4329101|4336076|4340026|4347717|4326889|4324941|4341252|
Plant hormone signal transduction	KEGG PATHWAY	osa04075	28	184	0.2763	0.222873	BGIOSGA019942|BGIOSGA005551|BGIOSGA023694|BGIOSGA017260|BGIOSGA001046|BGIOSGA023979|BGIOSGA004882|BGIOSGA033493|BGIOSGA020539|BGIOSGA031997|BGIOSGA032002|BGIOSGA010559|BGIOSGA011332|BGIOSGA009114|BGIOSGA014158|BGIOSGA031572|BGIOSGA011983|BGIOSGA035923	osa:4338933|osa:4330838|osa:4344331|osa:4337240|osa:4325895|osa:4343785|osa:4324934|osa:4349484|osa:4342060|osa:4348533|osa:4348531|osa:4333065|osa:4331832|osa:4330855|55|osa:4337309|osa:4349090||osa:4344331|osa:4337240|osa:4325895|osa:4349484|osa:4342060|55|osa:4337309|osa:4349090|osa:4337240|osa:4325895|osa:4343785|osa:4324934	4338933|4330838|4344331|4337240|4325895|4343785|4324934|4349484|4342060|4348533|4348531|4333065|4331832|4330855|4337309|4349090|4331833|4352660|
Tropane, piperidine and pyridine alkaloid biosynthesis	KEGG PATHWAY	osa00960	5	16	0.028516	0.220999	BGIOSGA008027|BGIOSGA002265|BGIOSGA016027|BGIOSGA004889|BGIOSGA021074	osa:4329101|osa:4324941|osa:4335335|osa:4324941|osa:4341252|	4329101|4324941|4335335|4324941|4341252|
Metabolic pathways	KEGG PATHWAY	osa01100	164	1549	0.0474743	0.307798	BGIOSGA016491|BGIOSGA035805|BGIOSGA001013|BGIOSGA004125|BGIOSGA036440|BGIOSGA004691|BGIOSGA012169|BGIOSGA029359|BGIOSGA022246|BGIOSGA002564|BGIOSGA033070|BGIOSGA009184|BGIOSGA034670|BGIOSGA016111|BGIOSGA000827|BGIOSGA020021|BGIOSGA017490|BGIOSGA011956|BGIOSGA037610|BGIOSGA000820|BGIOSGA017978|BGIOSGA014088|BGIOSGA000765|BGIOSGA005667|BGIOSGA001898|BGIOSGA029990|BGIOSGA006996|BGIOSGA032264|BGIOSGA…	osa:4331824|osa:4352829|osa:4324398|osa:4325375|osa:4352615|osa:4327493|osa:4332134|osa:4347717|osa:4340026|osa:4326465|osa:4348791|osa:4330975|osa:4351300|osa:4335430|osa:4324621|osa:4339066|osa:4339718|osa:4331779|osa:4352549|osa:4324637|osa:4325071|osa:4337406|osa:4326889|osa:4330649|osa:4324263|osa:4346723|osa:4328552|osa:4348152|osa:4330164|osa:4337272|osa:4350816|osa:4337265|osa:4340677|osa…	4331824|4352829|4324398|4325375|4352615|4327493|4332134|4347717|4340026|4326465|4348791|4330975|4351300|4335430|4324621|4339066|4339718|4331779|4352549|4324637|4325071|4337406|4326889|4330649|4324263|4346723|4328552|4348152|4330164|4337272|4350816|4337265|4340677|4327647|4349241|4325932|4333014|4349774|4335846|4336327|4329853|4347545|4346318|4332519|4342988|4348172|4336216|4328485|4334233|4335335…
Glutathione metabolism	KEGG PATHWAY	osa00480	13	80	0.0508844	0.307798	BGIOSGA008556|BGIOSGA005167|BGIOSGA033338|BGIOSGA022167|BGIOSGA010969|BGIOSGA010968|BGIOSGA015065|BGIOSGA006817|BGIOSGA018056|BGIOSGA033329|BGIOSGA015546|BGIOSGA016736|BGIOSGA024440	osa:4329889|osa:4325764|osa:4349207|osa:4339892|osa:4332455|osa:4332456|osa:4335896|osa:4328835|osa:4347319|osa:4349190|osa:4335202|osa:4336353|osa:4342988|	4329889|4325764|4349207|4339892|4332455|4332456|4335896|4328835|4347319|4349190|4335202|4336353|4342988|
Alanine, aspartate and glutamate metabolism	KEGG PATHWAY	osa00250	8	41	0.0532144	0.307798	BGIOSGA001013|BGIOSGA011354|BGIOSGA014182|BGIOSGA005667|BGIOSGA016863|BGIOSGA027464|BGIOSGA021074|BGIOSGA011956	osa:4324398|osa:4331792|osa:4337272|osa:4330649|osa:4330164|osa:4344928|osa:4341252|osa:4331779|	4324398|4331792|4337272|4330649|4330164|4344928|4341252|4331779|
Isoquinoline alkaloid biosynthesis	KEGG PATHWAY	osa00950	5	20	0.0562642	0.307798	BGIOSGA008027|BGIOSGA002265|BGIOSGA016027|BGIOSGA004889|BGIOSGA021074	osa:4329101|osa:4324941|osa:4335335|osa:4324941|osa:4341252|	4329101|4324941|4335335|4324941|4341252|
Ascorbate and aldarate metabolism	KEGG PATHWAY	osa00053	7	36	0.0690564	0.356791	BGIOSGA036501|BGIOSGA031289|BGIOSGA015546|BGIOSGA018236|BGIOSGA015065|BGIOSGA023093|BGIOSGA027993	osa:4351698|osa:4347885|osa:4335202|osa:4350816|osa:4335896|osa:4341305|osa:4344670|	4351698|4347885|4335202|4350816|4335896|4341305|4344670|
Tyrosine metabolism	KEGG PATHWAY	osa00350	7	37	0.0763864	0.373891	BGIOSGA032264|BGIOSGA002265|BGIOSGA016027|BGIOSGA008027|BGIOSGA034312|BGIOSGA004889|BGIOSGA021074	osa:4348152|osa:4324941|osa:4335335|osa:4329101|osa:4350053|osa:4324941|osa:4341252|	4348152|4324941|4335335|4329101|4350053|4324941|4341252|
Arginine and proline metabolism	KEGG PATHWAY	osa00330	10	63	0.0893227	0.415351	BGIOSGA016863|BGIOSGA017731|BGIOSGA014182|BGIOSGA005667|BGIOSGA022007|BGIOSGA006817|BGIOSGA014122|BGIOSGA009619|BGIOSGA021074|BGIOSGA024672	osa:4330164|osa:4339305|osa:4337272|osa:4330649|osa:4340008|osa:4328835|osa:4337360|osa:4342642|osa:4341252|osa:4342642|	4330164|4339305|4337272|4330649|4340008|4328835|4337360|4342642|4341252|4342642|
Circadian rhythm - plant	KEGG PATHWAY	osa04712	5	25	0.106837	0.473134	BGIOSGA008633|BGIOSGA002246|BGIOSGA009906|BGIOSGA010964|BGIOSGA028019	osa:4330000|osa:4325329|osa:4333930|osa:4332464|osa:4344703|	4330000|4325329|4333930|4332464|4344703|
Carotenoid biosynthesis	KEGG PATHWAY	osa00906	5	26	0.118959	0.491932	BGIOSGA008883|BGIOSGA005777|BGIOSGA026823|BGIOSGA025169|BGIOSGA008626	osa:4347261|osa:4330451|osa:4345810|osa:4342424|osa:4331854|	4347261|4330451|4345810|4342424|4331854|
Amino sugar and nucleotide sugar metabolism	KEGG PATHWAY	osa00520	14	103	0.121661	0.491932	BGIOSGA004840|BGIOSGA001006|BGIOSGA018236|BGIOSGA017490|BGIOSGA031231|BGIOSGA022643|BGIOSGA030039|BGIOSGA013440|BGIOSGA004810|BGIOSGA000339|BGIOSGA014250|BGIOSGA019833|BGIOSGA029990|BGIOSGA009184	osa:4325066|osa:4324117|osa:4350816|osa:4339718|osa:4347800|osa:4340677|osa:4346656|osa:4333895|osa:4327172|osa:4324962|osa:4337166|osa:4338719|osa:4346723|osa:4330975|	4325066|4324117|4350816|4339718|4347800|4340677|4346656|4333895|4327172|4324962|4337166|4338719|4346723|4330975|
Degradation of aromatic compounds	KEGG PATHWAY	osa01220	3	12	0.129876	0.503271	BGIOSGA032264|BGIOSGA018301|BGIOSGA034312	osa:4348152|osa:4338409|osa:4350053|	4348152|4338409|4350053|
Galactose metabolism	KEGG PATHWAY	osa00052	8	54	0.154425	0.574461	BGIOSGA028915|BGIOSGA031231|BGIOSGA013440|BGIOSGA024622|BGIOSGA000859|BGIOSGA020688|BGIOSGA029990|BGIOSGA008363	osa:4345925|osa:4347800|osa:4333895|osa:4342703|osa:4339369|osa:4341824|osa:4346723|osa:4329561|	4345925|4347800|4333895|4342703|4339369|4341824|4346723|4329561|
Valine, leucine and isoleucine biosynthesis	KEGG PATHWAY	osa00290	3	14	0.171579	0.613726	BGIOSGA004125|BGIOSGA008288|BGIOSGA029191	osa:4325375|osa:4329450|osa:4346318|	4325375|4329450|4346318|
Linoleic acid metabolism	KEGG PATHWAY	osa00591	3	15	0.193686	0.667141	BGIOSGA016491|BGIOSGA013391|BGIOSGA013525	osa:4331824|osa:4333818|osa:4334049|	4331824|4333818|4334049|
ABC transporters	KEGG PATHWAY	osa02010	2	9	0.239624	0.795894	BGIOSGA014966|BGIOSGA004259	osa:4336042|osa:9268765|	4336042|9268765|
2-Oxocarboxylic acid metabolism	KEGG PATHWAY	osa01210	6	46	0.279989	0.885637	BGIOSGA004125|BGIOSGA013607|BGIOSGA008288|BGIOSGA029191|BGIOSGA021074|BGIOSGA016736	osa:4325375|osa:4334188|osa:4329450|osa:4346318|osa:4341252|osa:4336353|	4325375|4334188|4329450|4346318|4341252|4336353|
Cysteine and methionine metabolism	KEGG PATHWAY	osa00270	10	85	0.288647	0.885637	BGIOSGA009121|BGIOSGA008027|BGIOSGA018799|BGIOSGA034046|BGIOSGA013607|BGIOSGA006817|BGIOSGA031909|BGIOSGA016156|BGIOSGA009886|BGIOSGA021074	osa:4330873|osa:4329101|osa:4337818|osa:4350455|osa:4334188|osa:4328835|osa:4348646|osa:4331707|osa:4333976|osa:4341252|	4330873|4329101|4337818|4350455|4334188|4328835|4348646|4331707|4333976|4341252|
Purine metabolism	KEGG PATHWAY	osa00230	15	135	0.295212	0.885637	BGIOSGA015713|BGIOSGA011354|BGIOSGA024281|BGIOSGA035008|BGIOSGA036477|BGIOSGA013440|BGIOSGA014088|BGIOSGA016724|BGIOSGA036640|BGIOSGA035597|BGIOSGA001898|BGIOSGA036091|BGIOSGA034500|BGIOSGA000438|BGIOSGA017365	osa:4334073|osa:4331792|osa:4343275|osa:4350078|osa:4351721|osa:4333895|osa:4337406|osa:4336327|osa:4351493|osa:4343681|osa:4324263|osa:4352344|osa:4349774|osa:4324793|osa:4337428|	4334073|4331792|4343275|4350078|4351721|4333895|4337406|4336327|4351493|4343681|4324263|4352344|4349774|4324793|4337428|
Carbon fixation in photosynthetic organisms	KEGG PATHWAY	osa00710	13	77	0.0406286	0.290651	BGIOSGA016636|BGIOSGA034421|BGIOSGA010483|BGIOSGA008564|BGIOSGA021074|BGIOSGA016111|BGIOSGA017978|BGIOSGA004775|BGIOSGA027913|Novel00606|BGIOSGA007623|BGIOSGA018078|BGIOSGA021999	osa:4336216|osa:4349897|osa:4333181|osa:4329892|osa:4341252|osa:4335430|osa:4325071|osa:4327400|osa:4344564|osa:4344564|osa:4328435|osa:4338750|osa:4340025|	4336216|4349897|4333181|4329892|4341252|4335430|4325071|4327400|4344564|4344564|4328435|4338750|4340025|
Ether lipid metabolism	KEGG PATHWAY	osa00565	3	22	0.359591	0.952873	BGIOSGA002564|BGIOSGA023222|BGIOSGA002291	osa:4326465|osa:4341468|osa:4327647|	4326465|4341468|4327647|
Nicotinate and nicotinamide metabolism	KEGG PATHWAY	osa00760	2	13	0.36948	0.952873	BGIOSGA026495|BGIOSGA016430	osa:4346302|osa:4334711|	4346302|4334711|
alpha-Linolenic acid metabolism	KEGG PATHWAY	osa00592	4	33	0.38792	0.952873	BGIOSGA016491|BGIOSGA037333|BGIOSGA021674|BGIOSGA009755	osa:4331824|osa:4352160|osa:4340485|osa:4334233|	4331824|4352160|4340485|4334233|
beta-Alanine metabolism	KEGG PATHWAY	osa00410	4	33	0.38792	0.952873	BGIOSGA014122|BGIOSGA016027|BGIOSGA006817|BGIOSGA000820	osa:4337360|osa:4335335|osa:4328835|osa:4324637|	4337360|4335335|4328835|4324637|
Fructose and mannose metabolism	KEGG PATHWAY	osa00051	6	53	0.388322	0.952873	BGIOSGA004775|BGIOSGA017978|BGIOSGA000859|BGIOSGA000339|BGIOSGA034421|BGIOSGA028505	osa:4327400|osa:4325071|osa:4339369|osa:4324962|osa:4349897|osa:4345338|	4327400|4325071|4339369|4324962|4349897|4345338|
Pantothenate and CoA biosynthesis	KEGG PATHWAY	osa00770	3	24	0.407285	0.952873	BGIOSGA004125|BGIOSGA008288|BGIOSGA029191	osa:4325375|osa:4329450|osa:4346318|	4325375|4329450|4346318|
Pyruvate metabolism	KEGG PATHWAY	osa00620	8	75	0.411752	0.952873	BGIOSGA035008|BGIOSGA010483|BGIOSGA014088|BGIOSGA036640|BGIOSGA001898|BGIOSGA034500|BGIOSGA014839|BGIOSGA018078	osa:4350078|osa:4333181|osa:4337406|osa:4351493|osa:4324263|osa:4349774|osa:9268154|osa:4338750|	4350078|4333181|4337406|4351493|4324263|4349774|9268154|4338750|
Sesquiterpenoid and triterpenoid biosynthesis	KEGG PATHWAY	osa00909	1	5	0.413834	0.952873	BGIOSGA011998	osa:9269735|	9269735|
C5-Branched dibasic acid metabolism	KEGG PATHWAY	osa00660	1	5	0.413834	0.952873	BGIOSGA008288	osa:4329450|	4329450|
Inositol phosphate metabolism	KEGG PATHWAY	osa00562	5	45	0.423631	0.952873	BGIOSGA002564|BGIOSGA008174|BGIOSGA013495|BGIOSGA023093|BGIOSGA004775	osa:4326465|osa:4329322|osa:4333967|osa:4341305|osa:4327400|	4326465|4329322|4333967|4341305|4327400|
Cyanoamino acid metabolism	KEGG PATHWAY	osa00460	4	36	0.447059	0.952873	BGIOSGA029453|BGIOSGA014893|BGIOSGA004982|BGIOSGA003613	osa:4347545|osa:4336146|osa:4348315|osa:4324050|	4347545|4336146|4348315|4324050|
Glycerophospholipid metabolism	KEGG PATHWAY	osa00564	7	68	0.458442	0.952873	BGIOSGA036440|BGIOSGA000901|BGIOSGA002281|BGIOSGA002291|BGIOSGA002564|BGIOSGA013088|BGIOSGA023222	osa:4352615|osa:4324704|osa:4327131|osa:4327647|osa:4326465|osa:4333407|osa:4341468|	4352615|4324704|4327131|4327647|4326465|4333407|4341468|
Taurine and hypotaurine metabolism	KEGG PATHWAY	osa00430	2	16	0.461068	0.952873	BGIOSGA035805|BGIOSGA013235	osa:4352829|osa:4352829|	4352829|4352829|
Stilbenoid, diarylheptanoid and gingerol biosynthesis	KEGG PATHWAY	osa00945	2	18	0.51764	1	BGIOSGA018301|BGIOSGA032580	osa:4338409|osa:4348172|	4338409|4348172|
Butanoate metabolism	KEGG PATHWAY	osa00650	2	20	0.570116	1	BGIOSGA008288|BGIOSGA027464	osa:4329450|osa:4344928|	4329450|4344928|
Ubiquinone and other terpenoid-quinone biosynthesis	KEGG PATHWAY	osa00130	3	32	0.582664	1	BGIOSGA008027|BGIOSGA018301|BGIOSGA007656	osa:4329101|osa:4338409|osa:4328485|	4329101|4338409|4328485|
Glycine, serine and threonine metabolism	KEGG PATHWAY	osa00260	5	55	0.587561	1	BGIOSGA013607|BGIOSGA016027|BGIOSGA004691|BGIOSGA004313|BGIOSGA011956	osa:4334188|osa:4335335|osa:4327493|osa:4325932|osa:4331779|	4334188|4335335|4327493|4325932|4331779|
Brassinosteroid biosynthesis	KEGG PATHWAY	osa00905	1	9	0.589528	1	BGIOSGA012169	osa:4332134|	4332134|
Thiamine metabolism	KEGG PATHWAY	osa00730	1	10	0.624519	1	BGIOSGA013327	osa:4333719|	4333719|
Sulfur metabolism	KEGG PATHWAY	osa00920	3	35	0.63937	1	BGIOSGA015713|BGIOSGA024240|BGIOSGA035597	osa:4334073|osa:4343348|osa:4343681|	4334073|4343348|4343681|
Fatty acid elongation	KEGG PATHWAY	osa00062	2	24	0.662265	1	BGIOSGA006907|BGIOSGA036833	osa:4328676|osa:9272332|	4328676|9272332|
Biosynthesis of unsaturated fatty acids	KEGG PATHWAY	osa01040	3	40	0.721352	1	BGIOSGA010945|BGIOSGA004922|BGIOSGA033070	osa:4332500|osa:4324844|osa:4348791|	4332500|4324844|4348791|
Pentose and glucuronate interconversions	KEGG PATHWAY	osa00040	3	41	0.735881	1	BGIOSGA019700|BGIOSGA003361|BGIOSGA031231	osa:4327282|osa:4327285|osa:4347800|	4327282|4327285|4347800|
Limonene and pinene degradation	KEGG PATHWAY	osa00903	1	14	0.737115	1	BGIOSGA032580	osa:4348172|	4348172|
Propanoate metabolism	KEGG PATHWAY	osa00640	1	14	0.737115	1	BGIOSGA000820	osa:4324637|	4324637|
One carbon pool by folate	KEGG PATHWAY	osa00670	1	15	0.759536	1	BGIOSGA009572	osa:4334554|	4334554|
Lysine biosynthesis	KEGG PATHWAY	osa00300	1	15	0.759536	1	BGIOSGA013607	osa:4334188|	4334188|
Phosphatidylinositol signaling system	KEGG PATHWAY	osa04070	3	43	0.763133	1	BGIOSGA008174|BGIOSGA013495|BGIOSGA036440	osa:4329322|osa:4333967|osa:4352615|	4329322|4333967|4352615|
Selenocompound metabolism	KEGG PATHWAY	osa00450	1	16	0.780047	1	BGIOSGA015713	osa:4334073|	4334073|
Glyoxylate and dicarboxylate metabolism	KEGG PATHWAY	osa00630	4	58	0.785553	1	BGIOSGA005667|BGIOSGA007252|BGIOSGA014839|BGIOSGA014182	osa:4330649|osa:4328073|osa:9268154|osa:4337272|	4330649|4328073|9268154|4337272|
Cutin, suberine and wax biosynthesis	KEGG PATHWAY	osa00073	1	17	0.798811	1	BGIOSGA029184	osa:4346301|	4346301|
Flavonoid biosynthesis	KEGG PATHWAY	osa00941	1	19	0.831677	1	BGIOSGA018301	osa:4338409|	4338409|
Biotin metabolism	KEGG PATHWAY	osa00780	1	20	0.846041	1	BGIOSGA033070	osa:4348791|	4348791|
Tryptophan metabolism	KEGG PATHWAY	osa00380	1	21	0.85918	1	BGIOSGA007252	osa:4328073|	4328073|
Fatty acid biosynthesis	KEGG PATHWAY	osa00061	2	40	0.883696	1	BGIOSGA004922|BGIOSGA033070	osa:4324844|osa:4348791|	4324844|4348791|
Fatty acid degradation	KEGG PATHWAY	osa00071	2	41	0.891615	1	BGIOSGA032264|BGIOSGA034312	osa:4348152|osa:4350053|	4348152|4350053|
Fatty acid metabolism	KEGG PATHWAY	osa01212	4	72	0.897641	1	BGIOSGA010945|BGIOSGA004922|BGIOSGA033070|BGIOSGA036833	osa:4332500|osa:4324844|osa:4348791|osa:9272332|	4332500|4324844|4348791|9272332|
Regulation of autophagy	KEGG PATHWAY	osa04140	1	26	0.909865	1	BGIOSGA000113	osa:4325756|	4325756|
Diterpenoid biosynthesis	KEGG PATHWAY	osa00904	1	27	0.917563	1	BGIOSGA034012	osa:4350502|	4350502|
RNA degradation	KEGG PATHWAY	osa03018	5	92	0.924552	1	BGIOSGA028741|BGIOSGA011109|BGIOSGA017385|BGIOSGA021980|BGIOSGA032247	osa:4347066|osa:4332253|osa:4337457|osa:4340042|osa:4348176|	4347066|4332253|4337457|4340042|4348176|
Citrate cycle (TCA cycle)	KEGG PATHWAY	osa00020	2	50	0.94338	1	BGIOSGA016736|BGIOSGA037610	osa:4336353|osa:4352549|	4336353|4352549|
Porphyrin and chlorophyll metabolism	KEGG PATHWAY	osa00860	1	35	0.959651	1	BGIOSGA031606	osa:4349044|	4349044|
N-Glycan biosynthesis	KEGG PATHWAY	osa00510	1	35	0.959651	1	BGIOSGA006132	osa:4329853|	4329853|
Valine, leucine and isoleucine degradation	KEGG PATHWAY	osa00280	1	36	0.9631	1	BGIOSGA000820	osa:4324637|	4324637|
SNARE interactions in vesicular transport	KEGG PATHWAY	osa04130	1	38	0.969139	1	BGIOSGA013690	osa:4334356|	4334356|
Peroxisome	KEGG PATHWAY	osa04146	3	78	0.973364	1	BGIOSGA029184|BGIOSGA007252|BGIOSGA016736	osa:4346301|osa:4328073|osa:4336353|	4346301|4328073|4336353|
Glycerolipid metabolism	KEGG PATHWAY	osa00561	1	43	0.980264	1	BGIOSGA036440	osa:4352615|	4352615|
Base excision repair	KEGG PATHWAY	osa03410	1	43	0.980264	1	BGIOSGA028887	osa:9272626|	9272626|
Terpenoid backbone biosynthesis	KEGG PATHWAY	osa00900	1	47	0.9862	1	BGIOSGA011998	osa:9269735|	9269735|
Pyrimidine metabolism	KEGG PATHWAY	osa00240	4	112	0.991297	1	BGIOSGA024281|BGIOSGA026495|BGIOSGA004131|BGIOSGA010087	osa:4343275|osa:4346302|osa:4324172|osa:4333679|	4343275|4346302|4324172|4333679|
Photosynthesis	KEGG PATHWAY	osa00195	2	79	0.99383	1	BGIOSGA003595|BGIOSGA009700	osa:4324479|osa:4334338|	4324479|4334338|
Phagosome	KEGG PATHWAY	osa04145	2	80	0.994297	1	BGIOSGA004310|BGIOSGA020149	osa:4327833|osa:4339262|	4327833|4339262|
Endocytosis	KEGG PATHWAY	osa04144	3	103	0.995434	1	BGIOSGA017326|BGIOSGA023222|BGIOSGA002291	osa:4337342|osa:4341468|osa:4327647|	4337342|4341468|4327647|
Aminoacyl-tRNA biosynthesis	KEGG PATHWAY	osa00970	3	114	0.997967	1	BGIOSGA029860|BGIOSGA023362|BGIOSGA001620	osa:4346920|osa:9272464|osa:4325717|	4346920|9272464|4325717|
Ubiquitin mediated proteolysis	KEGG PATHWAY	osa04120	3	119	0.9986	1	BGIOSGA000382|BGIOSGA000905|BGIOSGA019903	osa:4324993|osa:4324695|osa:4338850|	4324993|4324695|4338850|
Oxidative phosphorylation	KEGG PATHWAY	osa00190	4	144	0.999043	1	BGIOSGA005774|BGIOSGA018938|BGIOSGA025316|BGIOSGA004310	osa:4330457|osa:4337608|osa:4342621|osa:4327833|	4330457|4337608|4342621|4327833|
Ribosome biogenesis in eukaryotes	KEGG PATHWAY	osa03008	1	90	0.999708	1	BGIOSGA021736	osa:4340389|	4340389|
mRNA surveillance pathway	KEGG PATHWAY	osa03015	1	107	0.999937	1	BGIOSGA029341	osa:4339558|	4339558|
Protein processing in endoplasmic reticulum	KEGG PATHWAY	osa04141	3	203	0.999998	1	BGIOSGA026730|BGIOSGA012293|BGIOSGA020149	osa:9267802|osa:4332357|osa:4339262|	9267802|4332357|4339262|
RNA transport	KEGG PATHWAY	osa03013	1	151	0.999999	1	BGIOSGA008018	osa:4329091|	4329091|
Spliceosome	KEGG PATHWAY	osa03040	2	196	1	1	BGIOSGA005581|BGIOSGA026770	osa:4330796|osa:4345884|	4330796|4345884|
Guinongzhan (RKN vs mock)		Wushansimiao (R534) (RKN vs mock)
osa01000 Enzymes (206)		osa01000 Enzymes (178)
osa02000 Transporters (41)		osa03000 Transcription factors (33)
osa03000 Transcription factors (40)		osa02000 Transporters (27)
osa04131 Membrane trafficking (17)		osa04147 Exosome (19)
osa01001 Protein kinases (14)		osa01003 Glycosyltransferases (14)
osa01003 Glycosyltransferases (12)		osa04131 Membrane trafficking (13)
osa04147 Exosome (12)		osa01002 Peptidases and inhibitors (7)
osa00199 Cytochrome P450 (11)		osa04121 Ubiquitin system (6)
osa01002 Peptidases and inhibitors (10)		osa01001 Protein kinases (6)
osa03110 Chaperones and folding catalysts (10)		osa01009 Protein phosphatases and associated proteins (6)
osa04121 Ubiquitin system (9)		osa01007 Amino acid related enzymes (6)
osa01009 Protein phosphatases and associated proteins (9)		osa00199 Cytochrome P450 (5)
osa03029 Mitochondrial biogenesis (8)		osa03029 Mitochondrial biogenesis (5)
osa03036 Chromosome and associated proteins (8)		osa03016 Transfer RNA biogenesis (4)
osa01007 Amino acid related enzymes (7)		osa03019 Messenger RNA biogenesis (3)
osa03019 Messenger RNA biogenesis (4)		osa03036 Chromosome and associated proteins (3)
osa03016 Transfer RNA biogenesis (4)		osa03400 DNA repair and recombination proteins (3)
osa03009 Ribosome biogenesis (4)		osa01004 Lipid biosynthesis proteins (2)
osa03400 DNA repair and recombination proteins (3)		osa03041 Spliceosome (2)
osa04812 Cytoskeleton proteins (2)		osa04812 Cytoskeleton proteins (2)
osa01004 Lipid biosynthesis proteins (2)		osa03051 Proteasome (1)
osa04031 GTP-binding proteins (2)		osa01008 Polyketide biosynthesis proteins (1)
osa03012 Translation factors (2)		osa03110 Chaperones and folding catalysts (1)
osa01006 Prenyltransferases (1)		osa03009 Ribosome biogenesis (1)
osa03051 Proteasome (1)		osa00194 Photosynthesis proteins (1)
osa04030 G protein-coupled receptors (1)		osa03012 Translation factors (1)
osa03021 Transcription machinery (1)		osa04030 G protein-coupled receptors (1)
		osa04031 GTP-binding proteins (1)

## Sheet: Mapman  analysis
Mapman analysis the biotic stress of DEGs in indica cultivar Guinongzhan and Wushansimiao (R534)
Cluster analysis:Group 1								Cluster analysis: Group 4								Cluster analysis: Group 2, 3 and 5
proteolysis								Cell wall								transcription factor
BinCode	BinName	id	type	description	R534_mock	GNZ_mock		BinCode	BinName	id	type	description	R534_mock	GNZ_mock		BinCode	BinName	id	type	description	R534_mock	GNZ_mock
29.5.1	protein.degradation.subtilases	loc_os02g17060.1	Transcript	moderately similar to ( 349) AT1G32960 | Symbols: ATSBT3.3, SBT3.3 | SBT3.3; identical protein binding / serine-type endopeptidase | chr1:11945351-11948429 FORWARD protein|OsSub15 - Putative Subtilisin homologue, expressed	-1.9343	-4.6319		10.1.1.2	cell wall.precursor synthesis.NDP sugar pyrophosphorylase.GDP fucose and fucokinase	loc_os03g02410.1	Transcript	nearly identical (1312) AT1G01220 | Symbols: | GHMP kinase-related | chr1:91750-95552 FORWARD Fucokinase COG2605 protein|GHMP kinases ATP-binding protein, putative, expressed	0.48912	1.0895		27.3.3	RNA.regulation of transcription.AP2/EREBP, APETALA2/Ethylene-responsive element binding protein family	loc_os11g06770.1	Transcript	very weakly similar to (87.4) AT5G61890 | Symbols: | AP2 domain-containing transcription factor family protein | chr5:24852639-24853744 REVERSEAP2 AP2 protein|ethylene-responsive transcription factor ERF110, putative, expressed	5.1736	-0.59802
29.5.1	protein.degradation.subtilases	loc_os09g30458.1	Transcript	highly similar to ( 611) AT1G20160 | Symbols: ATSBT5.2 | ATSBT5.2; identical protein binding / serine-type endopeptidase | chr1:6990852-6993737 REVERSEPA_subtilisin_like protein|subtilisin-like protease, putative, expressed	-4.3852	-2.5076		10.1.2	cell wall.precursor synthesis.UGE	loc_os09g15420.1	Transcript	highly similar to ( 554) AT4G10960 | Symbols: UGE5 | UGE5 (UDP-D-glucose/UDP-D-galactose 4-epimerase 5); UDP-glucose 4-epimerase/ protein dimerization | chr4:6716083-6718472 REVERSEmoderately similar to ( 472) GALE1_PEA UDP-glucose 4-epimerase (EC 5.1.3.2) (Galactowaldenase) (UDP-galactose 4-epimerase) - Pisum sativum (Garden pea) GalE PRK10675 Epimerase WcaG RfbB Gmd PRK10084 PRK10217 protein|NA…	1.771	0.48821		27.3.3	RNA.regulation of transcription.AP2/EREBP, APETALA2/Ethylene-responsive element binding protein family	loc_os03g08500.1	Transcript	AP2 AP2 protein|AP2 domain containing protein, expressed	-0.17215	1.2214
29.5.3	protein.degradation.cysteine protease	loc_os01g58890.1	Transcript	weakly similar to ( 101) AT3G12490 | Symbols: ATCYSB | cysteine protease inhibitor, putative / cystatin, putative | chr3:3960523-3961777 REVERSEweakly similar to ( 157) CYT1_ORYSA Cysteine proteinase inhibitor 1 (Oryzacystatin-1) (Oryzacystatin I) - Oryza sativa (Rice)CY CY protein|cysteine proteinase inhibitor precursor protein, putative, expressed	-0.73876	-2.0224		10.2	cell wall.cellulose synthesis	loc_os02g09930.1	Transcript	highly similar to ( 767) AT5G22740 | Symbols: ATCSLA02, CSLA02, ATCSLA2 | ATCSLA02; mannan synthase/ transferase, transferring glycosyl groups | chr5:7555379-7559866 REVERSECOG1215 bcsA protein|CSLA1 - cellulose synthase-like family A; mannan synthase, expressed	0.84769	1.4365		27.3.3	RNA.regulation of transcription.AP2/EREBP, APETALA2/Ethylene-responsive element binding protein family	loc_os07g47790.1	Transcript	very weakly similar to (97.8) AT2G47520 | Symbols: | AP2 domain-containing transcription factor, putative | chr2:19502891-19503490 REVERSEAP2 AP2 protein|AP2 domain containing protein, expressed	2.1627	-1.4851
29.5.4	protein.degradation.aspartate protease	loc_os10g39260.1	Transcript	weakly similar to ( 164) AT2G03200 | Symbols: | aspartyl protease family protein | chr2:966506-967891 REVERSE protein|aspartic proteinase nepenthesin, putative, expressed	-0.44141	-2.1153		10.2	cell wall.cellulose synthesis	loc_os09g25900.1	Transcript	highly similar to ( 842) AT4G31590 | Symbols: ATCSLC05, CSLC05, ATCSLC5 | ATCSLC5 (CELLULOSE-SYNTHASE LIKE C5); cellulose synthase/ transferase, transferring glycosyl groups | chr4:15309889-15312336 REVERSECOG1215 bcsA PRK11204 protein|CSLC2 - cellulose synthase-like family C, expressed	1.0595	1.6757		27.3.3	RNA.regulation of transcription.AP2/EREBP, APETALA2/Ethylene-responsive element binding protein family	loc_os07g47790.2	Transcript	very weakly similar to (94.4) AT3G16770 | Symbols: RAP2.3, ATEBP, ERF72 | ATEBP (ETHYLENE-RESPONSIVE ELEMENT BINDING PROTEIN); DNA binding / protein binding / transcription activator/ transcription factor | chr3:5705784-5706768 FORWARDAP2 AP2 protein|AP2 domain containing protein, expressed	2.1627	-1.4851
29.5.4	protein.degradation.aspartate protease	loc_os02g27360.1	Transcript	moderately similar to ( 494) AT1G05840 | Symbols: | aspartyl protease family protein | chr1:1762843-1766150 REVERSEweakly similar to ( 117) ASP1_ORYSA Aspartic proteinase Asp1 precursor (EC 3.4.23.-) (OsAsp1) (OSAP1) (Nucellin-like protein) - Oryza sativa (Rice) Asp protein|aspartic proteinase-like protein 2 precursor, putative, expressed	-0.30845	-2.3586		10.2.1	cell wall.cellulose synthesis.cellulose synthase	loc_os07g36630.1	Transcript	highly similar to ( 790) AT3G03050 | Symbols: CSLD3, KJK, ATCSLD3 | CSLD3 (CELLULOSE SYNTHASE-LIKE D3); cellulose synthase/ transferase, transferring glycosyl groups | chr3:687873-691629 FORWARDCellulose_synt protein|CSLF8 - cellulose synthase-like family F; beta1,3;1,4 glucan synthase, expressed	2.347	2.0816		27.3.3	RNA.regulation of transcription.AP2/EREBP, APETALA2/Ethylene-responsive element binding protein family	loc_os05g36100.1	Transcript	AP2 AP2 protein|AP2 domain containing protein, expressed	4.6798	-1.198
29.5.4	protein.degradation.aspartate protease	loc_os03g20210.1	Transcript	moderately similar to ( 268) AT2G03200 | Symbols: | aspartyl protease family protein | chr2:966506-967891 REVERSE Asp protein|aspartic proteinase nepenthesin precursor, putative, expressed	-0.8531	-4.6684		10.2.1	cell wall.cellulose synthesis.cellulose synthase	loc_os05g08370.1	Transcript	nearly identical (1753) AT4G32410 | Symbols: CESA1, RSW1 | CESA1 (CELLULOSE SYNTHASE 1); cellulose synthase/ transferase, transferring glycosyl groups | chr4:15641009-15646388 REVERSECellulose_synt protein|CESA1 - cellulose synthase, expressed	1.4478	0.94445		27.3.3	RNA.regulation of transcription.AP2/EREBP, APETALA2/Ethylene-responsive element binding protein family	loc_os01g64790.1	Transcript	AP2 AP2 protein|AP2 domain containing protein, expressed	-0.047794	-3.0499
29.5.4	protein.degradation.aspartate protease	loc_os03g20290.1	Transcript	moderately similar to ( 274) AT2G03200 | Symbols: | aspartyl protease family protein | chr2:966506-967891 REVERSE Asp protein|aspartic proteinase nepenthesin-1 precursor, putative, expressed	-0.90901	-4.5205		10.2.1	cell wall.cellulose synthesis.cellulose synthase	loc_os10g20090.1	Transcript	highly similar to ( 604) AT2G32540 | Symbols: ATCSLB04, CSLB04, ATCSLB4 | ATCSLB04; cellulose synthase/ transferase/ transferase, transferring glycosyl groups | chr2:13814686-13818289 FORWARDCellulose_synt protein|CSLH1 - cellulose synthase-like family H, expressed	1.0792	1.3747		27.3.3	RNA.regulation of transcription.AP2/EREBP, APETALA2/Ethylene-responsive element binding protein family	loc_os01g21120.1	Transcript	very weakly similar to (97.4) AT2G47520 | Symbols: | AP2 domain-containing transcription factor, putative | chr2:19502891-19503490 REVERSEAP2 AP2 protein|AP2 domain containing protein, expressed	1.074	-0.30439
29.5.4	protein.degradation.aspartate protease	loc_os01g56930.1	Transcript	moderately similar to ( 455) AT5G22850 | Symbols: | aspartyl protease family protein | chr5:7633717-7636298 REVERSEvery weakly similar to (82.0) ASP1_ORYSA Aspartic proteinase Asp1 precursor (EC 3.4.23.-) (OsAsp1) (OSAP1) (Nucellin-like protein) - Oryza sativa (Rice) Asp protein|eukaryotic aspartyl protease domain containing protein, expressed	-1.049	-2.2628		10.2.1	cell wall.cellulose synthesis.cellulose synthase	loc_os09g30130.1	Transcript	highly similar to ( 734) AT1G55850 | Symbols: ATCSLE1, CSLE1 | ATCSLE1; cellulose synthase/ transferase, transferring glycosyl groups | chr1:20876752-20879414 FORWARDCellulose_synt protein|CSLE6 - cellulose synthase-like family E, expressed	0.73658	1.3433		27.3.3	RNA.regulation of transcription.AP2/EREBP, APETALA2/Ethylene-responsive element binding protein family	loc_os07g42510.1	Transcript	weakly similar to ( 122) AT3G16770 | Symbols: RAP2.3, ATEBP, ERF72 | ATEBP (ETHYLENE-RESPONSIVE ELEMENT BINDING PROTEIN); DNA binding / protein binding / transcription activator/ transcription factor | chr3:5705784-5706768 FORWARDweakly similar to ( 122) ERF1_ORYSA Ethylene-responsive transcription factor 1 (Ethylene-responsive element-binding factor 1) (EREBP-1) (OsEREBP1) - Oryza sativa (Rice)A…	0.10325	-1.12
29.5.4	protein.degradation.aspartate protease	loc_os02g48860.1	Transcript	moderately similar to ( 279) AT5G10770 | Symbols: | chloroplast nucleoid DNA-binding protein, putative | chr5:3403331-3405331 REVERSE Asp protein|aspartic proteinase nepenthesin-2 precursor, putative, expressed	-0.85059	-1.696		10.2.2	cell wall.cellulose synthesis.COBRA	loc_os05g32110.1	Transcript	highly similar to ( 664) AT5G60920 | Symbols: COB | COB (COBRA) | chr5:24511466-24513932 REVERSEhighly similar to ( 876) COBL3_ORYSA COBRA-like 3 protein precursor (BRITTLE CULM1-like 4 protein) - Oryza sativa (Rice)Phytochel_synth protein|COBRA, putative, expressed	1.0381	0.61081		27.3.3	RNA.regulation of transcription.AP2/EREBP, APETALA2/Ethylene-responsive element binding protein family	loc_os01g54890.1	Transcript	AP2 AP2 protein|ethylene-responsive transcription factor 2, putative, expressed	1.5874	-1.9043
29.5.4	protein.degradation.aspartate protease	loc_os06g50390.1	Transcript	moderately similar to ( 345) AT4G35880 | Symbols: | aspartyl protease family protein | chr4:16993339-16995721 FORWARD Asp protein|eukaryotic aspartyl protease domain containing protein, expressed	-1.5284	-2.9364		10.2.2	cell wall.cellulose synthesis.COBRA	loc_os03g30250.1	Transcript	highly similar to ( 628) AT5G15630 | Symbols: COBL4, IRX6 | IRX6 | chr5:5084842-5086545 FORWARDhighly similar to ( 799) COBL5_ORYSA COBRA-like 5 protein precursor (Protein BRITTLE CULM1) - Oryza sativa (Rice)Phytochel_synth protein|COBRA-like protein precursor, putative, expressed	0.25364	1.6086		27.3.32	RNA.regulation of transcription.WRKY domain transcription factor family	loc_os09g16510.1	Transcript	weakly similar to ( 115) AT2G46400 | Symbols: WRKY46, ATWRKY46 | WRKY46; transcription factor | chr2:19043676-19044754 REVERSEWRKY protein|WRKY74, expressed	3.1611	-0.97692
29.5.4	protein.degradation.aspartate protease	loc_os05g33400.1	Transcript	moderately similar to ( 360) AT1G03220 | Symbols: | extracellular dermal glycoprotein, putative / EDGP, putative | chr1:787143-788444 FORWARDmoderately similar to ( 205) 7SB1_SOYBN Basic 7S globulin precursor (Bg) (SBg7S) [Contains: Basic 7S globulin high kDa subunit; Basic 7S globulin low kDa subunit] - Glycine max (Soybean) protein|basic 7S globulin precursor, putative, expressed	-0.55144	-2.201		10.5.1.1	cell wall.cell wall proteins.AGPs.AGP	loc_os09g07350.1	Transcript	moderately similar to ( 274) AT4G12730 | Symbols: FLA2 | FLA2 (FASCICLIN-LIKE ARABINOGALACTAN 2) | chr4:7491598-7492809 REVERSE protein|fasciclin-like arabinogalactan protein 8 precursor, putative, expressed	0.88305	1.4376		27.3.32	RNA.regulation of transcription.WRKY domain transcription factor family	loc_os02g53100.1	Transcript	weakly similar to ( 160) AT1G68150 | Symbols: WRKY9, ATWRKY9 | WRKY9; transcription factor | chr1:25543970-25545615 FORWARDWRKY protein|WRKY32, expressed	0.29345	-2.902
29.5.4	protein.degradation.aspartate protease	loc_os09g30414.1	Transcript	moderately similar to ( 304) AT5G10770 | Symbols: | chloroplast nucleoid DNA-binding protein, putative | chr5:3403331-3405331 REVERSE Asp protein|aspartic proteinase nepenthesin-2 precursor, putative, expressed	-1.733	-1.8671		10.5.1.1	cell wall.cell wall proteins.AGPs.AGP	loc_os04g48490.1	Transcript	moderately similar to ( 323) AT2G45470 | Symbols: FLA8, AGP8 | FLA8 (FASCICLIN-LIKE ARABINOGALACTAN PROTEIN 8) | chr2:18742797-18744059 REVERSE protein|fasciclin-like arabinogalactan protein, putative, expressed	0.27511	1.2171		27.3.32	RNA.regulation of transcription.WRKY domain transcription factor family	loc_os12g02420.1	Transcript	very weakly similar to (87.0) AT2G40740 | Symbols: WRKY55, ATWRKY55 | WRKY55; transcription factor | chr2:16997177-16999276 FORWARD protein|WRKY97, expressed	0.87139	-1.9793
29.5.5	protein.degradation.serine protease	loc_os03g02530.1	Transcript	moderately similar to ( 309) AT1G63120 | Symbols: ATRBL2 | ATRBL2 (Arabidopsis thaliana Rhomboid-like 2); serine-type endopeptidase | chr1:23409054-23410725 REVERSE Rhomboid COG0705 protein|OsRhmbd7 - Putative Rhomboid homologue, expressed	-0.72341	-1.0977		10.5.1.1	cell wall.cell wall proteins.AGPs.AGP	loc_os08g38270.1	Transcript	weakly similar to ( 154) AT5G55730 | Symbols: FLA1 | FLA1 (FASCICLIN-LIKE ARAB INOGALACTAN 1) | chr5:22558375-22560392 REVERSE protein|fasciclin domain containing protein, expressed	1.1321	1.3301		27.3.32	RNA.regulation of transcription.WRKY domain transcription factor family	loc_os01g60520.1	Transcript	very weakly similar to (80.9) AT2G46400 | Symbols: WRKY46, ATWRKY46 | WRKY46; transcription factor | chr2:19043676-19044754 REVERSE protein|WRKY116, expressed	5.7819	-2.3449
29.5.5	protein.degradation.serine protease	loc_os04g48130.1	Transcript	moderately similar to ( 281) AT2G29050 | Symbols: ATRBL1 | ATRBL1 (Arabidopsis thaliana Rhomboid-like 1) | chr2:12478245-12479653 FORWARD Rhomboid COG0705 protein|OsRhmbd11 - Putative Rhomboid homologue, expressed	-0.85116	-2.8972		10.5.1.1	cell wall.cell wall proteins.AGPs.AGP	loc_os08g23180.1	Transcript	moderately similar to ( 273) AT5G55730 | Symbols: FLA1 | FLA1 (FASCICLIN-LIKE ARAB INOGALACTAN 1) | chr5:22558375-22560392 REVERSE protein|fasciclin-like arabinogalactan protein 8 precursor, putative, expressed	1.0276	1.2215		27.3.32	RNA.regulation of transcription.WRKY domain transcription factor family	loc_os09g25070.1	Transcript	weakly similar to ( 121) AT4G31800 | Symbols: WRKY18 | WRKY18; transcription factor | chr4:15383296-15384812 FORWARDWRKY protein|WRKY62, expressed	0.9181	-2.4512
29.5.5	protein.degradation.serine protease	loc_os10g37760.2	Transcript	weakly similar to ( 196) AT5G07250 | Symbols: ATRBL3 | ATRBL3 (ARABIDOPSIS RHOMBOID-LIKE PROTEIN 3) | chr5:2274437-2275935 REVERSE Rhomboid protein|OsRhmbd17 - Putative Rhomboid homologue, expressed	-3.0221	-2.292		10.5.3	cell wall.cell wall proteins.LRR	loc_os04g42620.1	Transcript	moderately similar to ( 340) AT4G06744 | Symbols: | leucine-rich repeat family protein / extensin family protein | chr4:4070870-4072084 REVERSEweakly similar to ( 103) PSKR_DAUCA Phytosulfokine receptor precursor (EC 2.7.11.1) (Phytosulfokine LRR receptor kinase) - Daucus carota (Carrot) protein|uncharacterized protein At4g06744 precursor, putative, expressed	0.33492	1.4568		27.3.32	RNA.regulation of transcription.WRKY domain transcription factor family	loc_os06g05380.1	Transcript	weakly similar to ( 190) AT5G15130 | Symbols: WRKY72, ATWRKY72 | WRKY72; transcription factor | chr5:4904426-4906879 FORWARDWRKY protein|WRKY73, expressed	0.57029	-3.1385
29.5.7	protein.degradation.metalloprotease	loc_os02g50730.1	Transcript	moderately similar to ( 324) AT1G24140 | Symbols: | matrixin family protein | chr1:8536131-8537285 REVERSEmoderately similar to ( 229) MEP1_SOYBN Metalloendoproteinase 1 precursor (EC 3.4.24.-) (SMEP1) - Glycine max (Soybean) ZnMc_MMP Peptidase_M10 ZnMc protein|metalloendoproteinase 1 precursor, putative, expressed	-1.9954	-3.3261		10.5.5	cell wall.cell wall proteins.RGP	loc_os07g41360.1	Transcript	highly similar to ( 654) AT3G08900 | Symbols: RGP3, RGP | RGP3 (REVERSIBLY GLYCOSYLATED POLYPEPTIDE 3); transferase, transferring hexosyl groups | chr3:2708347-2709714 REVERSEhighly similar to ( 671) UPTG1_SOLTU Alpha-1,4-glucan-protein synthase [UDP-forming] 1 (EC 2.4.1.112) (UDP-glucose:protein transglucosylase 1) (UPTG 1) - Solanum tuberosum (Potato)RGP protein|alpha-1,4-glucan-protein synthas…	1.2277	0.69198		27.3.32	RNA.regulation of transcription.WRKY domain transcription factor family	loc_os05g39720.1	Transcript	moderately similar to ( 241) AT2G38470 | Symbols: WRKY33, ATWRKY33 | WRKY33; transcription factor | chr2:16108476-16110539 FORWARDWRKY protein|WRKY70, expressed	3.5229	-4.2522
29.5.7	protein.degradation.metalloprotease	loc_os06g13180.1	Transcript	moderately similar to ( 295) AT1G70170 | Symbols: MMP | MMP (MATRIX METALLOPROTEINASE); metalloendopeptidase/ metallopeptidase | chr1:26424005-26425141 FORWARDmoderately similar to ( 221) MEP1_SOYBN Metalloendoproteinase 1 precursor (EC 3.4.24.-) (SMEP1) - Glycine max (Soybean) ZnMc_MMP Peptidase_M10 ZnMc protein|metalloendoproteinase 1 precursor, putative, expressed	-2.7347	-3.3973		10.6.2	cell wall.degradation.mannan-xylose-arabinose-fucose	loc_os03g61280.1	Transcript	moderately similar to ( 395) AT5G66460 | Symbols: | (1-4)-beta-mannan endohydrolase, putative | chr5:26538911-26540837 REVERSECOG3934 protein|OsMan05 - Endo-Beta-Mannanase, expressed	1.1419	2.2192		27.3.32	RNA.regulation of transcription.WRKY domain transcription factor family	loc_os01g47560.1	Transcript	weakly similar to ( 159) AT1G29860 | Symbols: WRKY71, ATWRKY71 | WRKY71; transcription factor | chr1:10454482-10455652 FORWARDWRKY protein|WRKY16, expressed	0.061861	-2.4534
29.5.9	protein.degradation.AAA type	loc_os12g44190.1	Transcript	moderately similar to ( 498) AT5G40010 | Symbols: AATP1 | AATP1 (AAA-ATPase 1); ATP binding / ATPase/ nucleoside-triphosphatase/ nucleotide binding | chr5:16020218-16021762 REVERSE AAA protein|ATPase 3, putative, expressed	-0.087557	-2.1522		10.6.2	cell wall.degradation.mannan-xylose-arabinose-fucose	loc_os01g47400.1	Transcript	highly similar to ( 506) AT5G66460 | Symbols: | (1-4)-beta-mannan endohydrolase, putative | chr5:26538911-26540837 REVERSECOG3934 protein|OsMan01 - Endo-Beta-Mannanase, expressed	1.4952	2.1529		27.3.32	RNA.regulation of transcription.WRKY domain transcription factor family	loc_os02g08440.1	Transcript	weakly similar to ( 161) AT1G80840 | Symbols: WRKY40, ATWRKY40 | WRKY40; transcription factor | chr1:30383834-30385356 FORWARDWRKY protein|WRKY71, expressed	2.4633	-3.3074
29.5.9	protein.degradation.AAA type	loc_os01g43480.1	Transcript	highly similar to ( 711) AT1G64110 | Symbols: | AAA-type ATPase family protein | chr1:23796887-23801255 REVERSEweakly similar to ( 157) CDC48_CAPAN Cell division cycle protein 48 homolog - Capsicum annuum (Bell pepper) SpoVK PRK03992 RPT1 AAA HflB hflB COG1223 protein|AAA-type ATPase family protein, putative, expressed	-0.13481	-1.9918		10.6.2	cell wall.degradation.mannan-xylose-arabinose-fucose	loc_os01g04300.1	Transcript	highly similar to ( 545) AT1G58370 | Symbols: RXF12, ATXYN1 | RXF12; endo-1,4-beta-xylanase/ hydrolase, hydrolyzing O-glycosyl compounds | chr1:21684751-21688209 FORWARDweakly similar to ( 148) POLB_MAIZE Putative Pol polyprotein from transposon element Bs1 (ORF 1) - Zea mays (Maize)Glyco_10 Glyco_hydro_10 XynA protein|glycosyl hydrolase family 10 protein, putative, expressed	2.1149	1.244		27.3.32	RNA.regulation of transcription.WRKY domain transcription factor family	loc_os09g25070.2	Transcript	weakly similar to ( 122) AT4G31800 | Symbols: WRKY18 | WRKY18; transcription factor | chr4:15383296-15384812 FORWARDWRKY protein|WRKY62, expressed	0.9181	-2.4512
29.5.9	protein.degradation.AAA type	loc_os07g09420.1	Transcript	moderately similar to ( 421) AT3G28580 | Symbols: | AAA-type ATPase family protein | chr3:10715736-10717238 FORWARD AAA protein|ATPase, putative, expressed	-1.6002	-2.7761		10.6.2	cell wall.degradation.mannan-xylose-arabinose-fucose	loc_os03g10440.1	Transcript	highly similar to ( 536) AT4G33840 | Symbols: | glycosyl hydrolase family 10 protein | chr4:16223694-16226095 REVERSEGlyco_10 Glyco_hydro_10 XynA protein|glycosyl hydrolase family 10 protein, putative, expressed	2.6765	2.6014		27.3.32	RNA.regulation of transcription.WRKY domain transcription factor family	loc_os12g02420.2	Transcript	very weakly similar to (84.0) AT2G40740 | Symbols: WRKY55, ATWRKY55 | WRKY55; transcription factor | chr2:16997177-16999276 FORWARD protein|WRKY97, expressed	0.87139	-1.9793
29.5.9	protein.degradation.AAA type	loc_os03g02330.1	Transcript	moderately similar to ( 340) AT2G46620 | Symbols: | AAA-type ATPase family protein | chr2:19139071-19140546 REVERSE protein|AAA-type ATPase family protein, putative, expressed	-0.60007	-2.6136		10.6.2	cell wall.degradation.mannan-xylose-arabinose-fucose	loc_os04g54810.1	Transcript	nearly identical (1093) AT5G64570 | Symbols: XYL4, ATBXL4 | XYL4; hydrolase, hydrolyzing O-glycosyl compounds / xylan 1,4-beta-xylosidase | chr5:25810227-25813309 REVERSEmoderately similar to ( 469) XYNB_PRUPE Putative beta-D-xylosidase (EC 3.2.1.-) (PpAz152) (Fragment) - Prunus persica (Peach)BglX Glyco_hydro_3 Glyco_hydro_3_C protein|beta-D-xylosidase, putative, expressed	1.122	1.9943		27.3.32	RNA.regulation of transcription.WRKY domain transcription factor family	loc_os01g61080.1	Transcript	moderately similar to ( 258) AT2G38470 | Symbols: WRKY33, ATWRKY33 | WRKY33; transcription factor | chr2:16108476-16110539 FORWARDWRKY protein|WRKY24, expressed	2.5987	-3.6732
29.5.9	protein.degradation.AAA type	loc_os05g51130.1	Transcript	moderately similar to ( 436) AT3G50930 | Symbols: BCS1 | BCS1 (CYTOCHROME BC1 SYNTHESIS); ATP binding / ATPase/ nucleoside-triphosphatase/ nucleotide binding | chr3:18929817-18931547 FORWARD protein|mitochondrial chaperone BCS1, putative, expressed	-1.7017	-2.9208		10.6.2	cell wall.degradation.mannan-xylose-arabinose-fucose	loc_os01g54300.1	Transcript	highly similar to ( 522) AT2G20680 | Symbols: | glycosyl hydrolase family 5 protein / cellulase family protein | chr2:8921024-8923066 FORWARDCOG3934 protein|OsMan02 - Endo-Beta-Mannanase, expressed	1.8542	2.5262		27.3.32	RNA.regulation of transcription.WRKY domain transcription factor family	loc_os01g09080.1	Transcript	weakly similar to ( 145) AT5G15130 | Symbols: WRKY72, ATWRKY72 | WRKY72; transcription factor | chr5:4904426-4906879 FORWARDWRKY protein|WRKY107, expressed	0.41422	-3.6427
29.5.9	protein.degradation.AAA type	loc_os10g37500.1	Transcript	moderately similar to ( 341) AT2G46620 | Symbols: | AAA-type ATPase family protein | chr2:19139071-19140546 REVERSE protein|AAA-type ATPase family protein, putative, expressed	-0.83049	-1.3848		10.6.3	cell wall.degradation.pectate lyases and polygalacturonases	loc_os01g43490.1	Transcript	moderately similar to ( 362) AT2G43890 | Symbols: | polygalacturonase, putative / pectinase, putative | chr2:18176924-18178390 FORWARDmoderately similar to ( 382) PGLR_PRUPE Polygalacturonase precursor (EC 3.2.1.15) (PG) (Pectinase) - Prunus persica (Peach)Glyco_hydro_28 PGU1 protein|polygalacturonase, putative, expressed	1.172	4.2142		27.3.32	RNA.regulation of transcription.WRKY domain transcription factor family	loc_os05g25770.1	Transcript	very weakly similar to (97.4) AT3G56400 | Symbols: WRKY70, ATWRKY70 | WRKY70; transcription factor/ transcription repressor | chr3:20909082-20910409 REVERSEWRKY protein|WRKY45, expressed	3.2115	-0.90662
[truncated: 223 more rows]

## Sheet: putative genes in this study
Gene_name	Gene ID
OsHIPP	BGIOSGA013570,BGIOSGA026405,BGIOSGA034792,BGIOSGA036982，BGIOSGA037304
calcium-dependent protein kinase genes CDPKs	BGIOSGA008829, BGIOSGA024062, BGIOSGA026567
calcium-binding proteins CAMCML	BGIOSGA001257, BGIOSGA000087, BGIOSGA000756, BGIOSGA002446, BGIOSGA005164, BGIOSGA010806, BGIOSGA000109, BGIOSGA016668, BGIOSGA018321, BGIOSGA018153
mitogen-activated protein kinase 1 and 5	BGIOSGA009963，BGIOSGA010959
protein phosphatase 2C	BGIOSGA017925, BGIOSGA011032, BGIOSGA003839
ABSCISIC ACID-INSENSITIVE 5-like protein	BGIOSGA005551
[truncated: 3 more rows]

## Sheet: Validation RNA-seq by qRT-PCR
Verification of transcription expression using qRT-PCR
Gene name	GNZ_RNA-Seq_log2FC	GNZ_RT_log2FC	GNZ_RT_2-△△Ct	R534_RNA-Seq	R534_RT_log2FC	R534_RT_2-△△Ct
[truncated: 34 more rows]
